# Supplementary material for: Systematic identification of ALK substrates by integrated phosphoproteome and interactome analysis
Source: Life Sci Alliance. 2022 May 4;5(8):e202101202. doi: 10.26508/lsa.202101202 (PMC9069051; doi:10.26508/lsa.202101202)
Supplement: Supplementary file 1 [file LSA-2021-01202_SdataF1_F2_F3_F4_F5_F6.xlsx]

## Sheet: Fig1B
Gene names	Positions		Dox NT	Dox 2h	Dox 4h	Dox 8h	Dox 24h
ALK	total	ALK_total	0	0.206416	0.825538	1.6545	2.04743
ALK	Y1507	ALK_Y1507	0	0.651653	2.41959	4.60699	5.28117
				2	4	8	24

## Sheet: Fig1C
	Time cource (h)	2	4	8	24
	<0.66	16	21	21	77
	0.66< ratio <1.5	651	642	626	494
	> 1.5	7	11	27	99

## Sheet: Fig1C_2
Log2 intensity Dox -	Log2 intensityDox 2h	Log2 intensityDox 4h	Log2 intensityDox 8h	Log2 intensityDox 24h	Amino acid	Charge	Localization prob	PEP	Score	Delta score	Proteins	Positions within proteins	Leading proteins	Protein	Protein names	Gene names	Sequence window	Score diff	Modification window	Peptide window coverage	Phospho (STY) Probabilities	Phospho (STY) Score diffs	up regulated sites	PPI interactor
0	-0.0261904	1.0937	2.10855	4.47654	Y	3	1	6.8e-20	203.27	181.38	Q9UM73	1096	Q9UM73	Q9UM73	ALK tyrosine kinase receptor	ALK	SKLRTSTIMTDYNPNYCFAGKTSSISDLKEV	79.8164	X;X;X;X;Phospho (STY);X;X;X;Oxidation (M);X;X;X;X;X;X;Phospho (STY);X;X;X;X;X;X;X;X;X;X;X;X;X;X;X	XXPPPPPPPPPPPPPPPPPPPXXXXXXXXXX	TSTIMTDYNPNY(1)CFAGK	T(-139.65)S(-139.65)T(-134.56)IMT(-117.48)DY(-79.82)NPNY(79.82)CFAGK	yes	yes
0	0.651653	2.41959	4.60699	5.28117	Y	4	0.801388	1.03e-27	221.14	210	Q9UM73	1507	Q9UM73	Q9UM73	ALK tyrosine kinase receptor	ALK	VHGSRNKPTSLWNPTYGSWFTEKPTKKNNPI	6.06113	X;X;X;X;X;X;X;X;X;X;X;X;X;X;X;Phospho (STY);X;X;X;X;X;X;X;X;X;X;X;X;X;X;X	XXXXXPPPPPPPPPPPPPPPPPPPPPXXXXX	NKPTSLWNPT(0.198)Y(0.801)GSWFTEKPTK	NKPT(-113.06)S(-106.51)LWNPT(-6.06)Y(6.06)GS(-38.04)WFT(-71.15)EKPT(-105.58)K	yes	yes
0	0.930286	1.62004	2.48452	4.56323	Y	4	0.99713	1.95e-31	216.52	208.48	Q9UM73	1586	Q9UM73	Q9UM73	ALK tyrosine kinase receptor	ALK	LFRLRHFPCGNVNYGYQQQGLPLEAATAPGA	25.408	X;X;X;X;X;X;X;X;X;X;X;X;X;X;X;Phospho (STY);X;X;X;X;X;X;X;X;X;X;X;X;X;X;X	XXXXXPPPPPPPPPPPPPPPPPPPPPPPPPP	HFPCGNVNY(0.003)GY(0.997)QQQGLPLEAATAPGAGHYEDTILK	HFPCGNVNY(-25.41)GY(25.41)QQQGLPLEAAT(-137.88)APGAGHY(-179.06)EDT(-190.56)ILK	yes	yes
0	0.260864	0.844512	1.19868	3.9943	Y	3	1	8.74e-15	208.63	165.32	Q9UM73;P29376-5;P29376-4;P29376	1278;542;611;672	Q9UM73	Q9UM73	ALK tyrosine kinase receptor;Leukocyte tyrosine kinase receptor	ALK;LTK	GRVAKIGDFGMARDIYRASYYRKGGCAMLPV	105.082	X;X;X;X;X;X;X;X;X;X;X;X;X;X;X;Phospho (STY);X;X;Phospho (STY);Phospho (STY);Phospho (STY);X;X;X;X;X;X;X;X;X;X	XXXXXXXXXXXXXPPPPPPPPPPXXXXXXXX	DIY(1)RASYYR	DIY(105.08)RAS(-105.08)Y(-127.94)Y(-156.08)R	yes	yes
0	0.321528	0.870122	1.1008	3.49818	Y	3	0.997983	1.7e-09	157.66	127.05	Q9UM73;P29376-5;P29376-4;P29376	1282;546;615;676	Q9UM73	Q9UM73	ALK tyrosine kinase receptor;Leukocyte tyrosine kinase receptor	ALK;LTK	KIGDFGMARDIYRASYYRKGGCAMLPVKWMP	27.0074	X;X;X;X;X;X;X;X;X;X;X;Phospho (STY);X;X;X;Phospho (STY);Phospho (STY);X;X;X;X;X;X;X;X;X;X;X;X;X;X	XXXXXXXXXPPPPPPPPPPXXXXXXXXXXXX	DIY(1)RAS(0.002)Y(0.998)YR	DIY(77.43)RAS(-27.01)Y(27.01)Y(-45.31)R	yes	yes
0	0.19417	0.555457	0.847204	3.56044	Y	3	0.999886	3.3e-07	151.83	115.92	Q9UM73;P29376-5;P29376-4;P29376	1283;547;616;677	Q9UM73	Q9UM73	ALK tyrosine kinase receptor;Leukocyte tyrosine kinase receptor	ALK;LTK	IGDFGMARDIYRASYYRKGGCAMLPVKWMPP	39.7187	X;X;X;X;X;X;X;X;X;X;Phospho (STY);X;X;X;Phospho (STY);Phospho (STY);X;X;X;X;X;X;X;X;X;X;X;X;X;X;X	XXXXXXXXPPPPPPPPPPXXXXXXXXXXXXX	DIY(1)RASYY(1)R	DIY(71.84)RAS(-51.58)Y(-39.72)Y(39.72)R	yes	yes
0	0.26289	0.296503	0.401795	0.736018	Y	2	0.989786	1.22e-19	203.06	183.39	P07355;A6NMY6;P07355-2	30;30;48	P07355	P07355	Annexin A2;Putative annexin A2-like protein	ANXA2;ANXA2P2	GDHSTPPSAYGSVKAYTNFDAERDALNIETA	19.8635	X;X;X;X;X;X;X;X;X;Phospho (STY);X;X;X;X;X;Phospho (STY);X;X;X;X;X;X;X;X;X;X;X;X;X;X;X	XXXXXXXXXXXXXXPPPPPPPPPPPPPPPPP	AY(0.99)T(0.01)NFDAER	AY(19.86)T(-19.86)NFDAER	yes	yes
0	-0.0928183	0.0389303	0.0585019	0.66377	Y	3	1	7.29e-09	137.95	115.89	Q06481-5;Q06481-4;Q06481-2;Q06481-3;Q06481-6;Q06481	509;682;694;738;748;750	Q06481-5	Q06481-5	Amyloid-like protein 2	APLP2	LTPEERHLNKMQNHGYENPTYKYLEQMQI__	102.679	X;X;X;X;X;X;X;X;X;X;Oxidation (M);X;X;X;X;Phospho (STY);X;X;X;X;X;X;X;X;X;X;X;X;X;X;X	XXXXXXXXXXPPPPPPPPPPPPXXXXXXXXX	MQNHGY(1)ENPTYK	MQNHGY(102.68)ENPT(-102.68)Y(-105.4)K	yes	yes
0	-0.0988281	0.0116207	0.253331	0.83366	Y	3	1	7.21e-08	138.45	114.1	P09543-2;P09543	90;110	P09543-2	P09543-2	2',3'-cyclic-nucleotide 3'-phosphodiesterase	CNP	AFSEEYKRLDEDLAAYCRRRDIRILVLDDTN	138.449	X;X;X;X;X;X;X;X;X;X;X;X;X;X;X;Phospho (STY);X;X;X;X;X;X;X;X;X;X;X;X;X;X;X	XXXXXXXPPPPPPPPPPPXXXXXXXXXXXXX	RLDEDLAAY(1)CR	RLDEDLAAY(138.45)CR	yes	yes
0	0.115801	-0.0437816	0.0293752	1.01975	Y	2	1	1.13e-08	146.16	117.21	Q7L576-3;Q7L576-2;Q96F07-2;Q7L576;Q96F07	248;623;1053;1054;1078	Q7L576-3	Q7L576-3	Cytoplasmic FMR1-interacting protein 1;Cytoplasmic FMR1-interacting protein 2	CYFIP1;CYFIP2	EGERLDAKMKRLESKYAPLHLVPLIERLGTP	146.163	X;X;X;X;X;X;X;X;X;X;X;X;X;X;X;Phospho (STY);X;X;X;X;X;X;X;X;X;X;X;X;X;X;X	XXXXXXXXXXXXXXXPPPPPPPPPPPPXXXX	Y(1)APLHLVPLIER	Y(146.16)APLHLVPLIER	yes	yes
0	0.260211	0.692485	1.69937	1.14694	Y	3	0.997002	2.94e-20	211.06	179.65	P50402	161	P50402	P50402	Emerin	EMD	ECKDRERPMYGRDSAYQSITHYRPVSASRSS	26.8398	X;X;X;X;X;X;X;X;X;X;X;X;X;X;X;Phospho (STY);X;X;X;X;X;X;X;X;X;X;X;X;X;X;X	XXXXXXXXXXXXPPPPPPPPPPPPPPPPPXX	DS(0.002)AY(0.997)QS(0.001)ITHYRPVSASR	DS(-26.84)AY(26.84)QS(-30.28)IT(-93.28)HY(-139.8)RPVS(-168.45)AS(-177.69)R	yes	yes
0	0.455039	1.34137	2.64179	2.97488	Y	2	0.999999	0.000220742	121.67	49.794	Q9BSJ8;Q9BSJ8-2	359;359	Q9BSJ8	Q9BSJ8	Extended synaptotagmin-1	ESYT1	KDKYVKGLIEGKSDPYALVRLGTQTFCSRVI	58.7912	X;X;X;X;X;X;X;X;X;X;X;X;X;X;X;Phospho (STY);X;X;X;X;X;X;X;X;X;X;X;X;X;X;X	XXXXXXXXXXXXPPPPPPPPXXXXXXXXXXX	SDPY(1)ALVR	S(-58.79)DPY(58.79)ALVR	yes	yes
0	-0.335603	0.18178	0.497282	1.98588	Y	4	0.999996	2.01e-27	224.06	196.73	Q9BSJ8;Q9BSJ8-2	822;832	Q9BSJ8	Q9BSJ8	Extended synaptotagmin-1	ESYT1	AEDLPLRKGTKHLSPYATLTVGDSSHKTKTI	53.8905	X;X;X;X;X;X;X;X;X;X;X;X;X;X;X;Phospho (STY);X;X;X;X;X;X;X;X;X;X;X;X;X;X;X	XXXXXXXXXXXPPPPPPPPPPPPPPPPXXXX	HLSPY(1)ATLTVGDSSHK	HLS(-53.89)PY(53.89)AT(-74.03)LT(-110.05)VGDS(-138.64)S(-144.28)HK	yes	yes
0	0.0807479	-0.00425924	0.541532	1.27447	Y	2	0.999716	1.5e-08	147.12	128.5	A0FGR8-5;A0FGR8-2;A0FGR8;A0FGR8-6	231;796;824;845	A0FGR8-5	A0FGR8-5	Extended synaptotagmin-2	ESYT2	ACRNLIAFSEDGSDPYVRMYLLPDKRRSGRR	35.4589	X;X;X;X;X;X;X;X;X;X;X;X;X;X;X;Phospho (STY);X;X;X;X;X;X;X;X;X;X;X;X;X;X;X	XXXPPPPPPPPPPPPPPPXXXXXXXXXXXXX	NLIAFSEDGSDPY(1)VR	NLIAFS(-75)EDGS(-35.46)DPY(35.46)VR	yes	yes
0	0.547725	1.50368	2.1108	1.67689	Y	3	0.850197	1.84e-12	165.58	134.86	Q96CS3	79	Q96CS3	Q96CS3	FAS-associated factor 2	FAF2	PPSRPLQVNTADHRIYSYVVSRPQPRGLLGW	7.54244	X;X;X;X;X;X;X;X;X;X;X;X;X;X;X;Phospho (STY);X;X;X;X;X;X;X;X;X;X;X;X;X;X;X	XXXXXXXXXXXXXXPPPPPPPPPPPPXXXXX	IY(0.85)S(0.15)YVVSRPQPR	IY(7.54)S(-7.54)Y(-40.04)VVS(-109.38)RPQPR	yes	yes
0	0.0805737	0.221974	0.213333	1.20357	Y	3	1	0.0224715	50.966	7.9657	O75955-2;O75955	168;216	O75955-2	O75955-2	Flotillin-1	FLOT1	AQYLSEIEMAKAQRDYELKKAAYDIEVNTRR	50.9659	X;X;X;X;X;X;X;X;X;X;X;X;X;X;X;Phospho (STY);X;X;X;X;X;X;X;X;X;X;X;X;X;X;X	XXXXXXXXXXXXXXPPPPPPXXXXXXXXXXX	DY(1)ELKK	DY(50.97)ELKK	yes	yes
0	0.0702001	0.447274	0.116332	0.603363	Y	3	1	9.75e-09	144.8	113.91	O75955-2;O75955	190;238	O75955-2	O75955-2	Flotillin-1	FLOT1	YDIEVNTRRAQADLAYQLQVAKTKQQIEEQR	144.803	X;X;X;X;X;X;X;X;X;X;X;X;X;X;X;Phospho (STY);X;X;X;X;X;X;X;X;X;X;X;X;X;X;X	XXXXXXXXPPPPPPPPPPPPPPXXXXXXXXX	RAQADLAY(1)QLQVAK	RAQADLAY(144.8)QLQVAK	yes	yes
0	-0.0744846	-0.0191067	0.145277	0.667429	Y	3	0.781783	7.22e-09	151.39	135.06	O60547-2;O60547	293;323	O60547-2	O60547-2	GDP-mannose 4,6 dehydratase	GMDS	RCKETGKVHVTVDLKYYRPTEVDFLQGDCTK	6.05818	X;X;X;X;X;X;X;X;X;X;X;X;X;X;X;Phospho (STY);X;X;X;X;X;X;X;X;X;X;X;X;X;X;X	XXXXXXXXXXXXXXXPPPPPPPPPPPPPPPP	Y(0.782)Y(0.194)RPT(0.024)EVDFLQGDCTK	Y(6.06)Y(-6.06)RPT(-15.05)EVDFLQGDCT(-135.87)K	yes	yes
0	0.0831918	0.233397	0.380361	1.75061	Y	3	1	4.9e-18	198.72	168.11	O14654	151	O14654	O14654	Insulin receptor substrate 4	IRS4	AAIPPLIPPRRVITLYQCFSVSQRADARYRH	71.9224	X;X;X;X;X;X;X;X;X;X;X;X;X;X;X;Phospho (STY);X;X;X;X;X;X;X;X;X;X;X;X;X;X;X	XXXXXXXXXXPPPPPPPPPPPPPPXXXXXXX	VITLY(1)QCFSVSQR	VIT(-71.92)LY(71.92)QCFS(-122.01)VS(-142.4)QR	yes	yes
0	-0.0724529	0.10516	0.41649	1.87437	Y	3	1	7.57e-36	242.19	199.24	O14654	291	O14654	O14654	Insulin receptor substrate 4	IRS4	VVQLLSIRRCGHSEQYFFLEVGRSTVIGPGE	81.3964	X;X;X;X;X;X;X;X;X;X;X;X;X;X;X;Phospho (STY);X;X;X;X;X;X;X;X;X;X;X;X;X;X;X	XXXXXXXXPPPPPPPPPPPPPPPXXXXXXXX	RCGHSEQY(1)FFLEVGR	RCGHS(-81.4)EQY(81.4)FFLEVGR	yes	yes
0	-0.207479	-0.352118	0.216398	1.03829	Y	2	1	3.76e-15	188.04	166.05	O14654	336	O14654	O14654	Insulin receptor substrate 4	IRS4	HELFLEKMRALCADEYRARCRSYSISIGAHL	133.807	X;X;X;X;X;X;X;X;X;X;X;X;X;X;X;Phospho (STY);X;X;X;X;X;X;X;X;X;X;X;X;X;X;X	XXXXXXXXXPPPPPPPPPPXXXXXXXXXXXX	ALCADEY(1)RAR	ALCADEY(133.81)RAR	yes	yes
0	0.133662	0.100671	0.603229	1.49276	Y	3	0.999543	7.28e-06	122.7	98.669	O14654	615	O14654	O14654	Insulin receptor substrate 4	IRS4	SDGDGERGKSLKKRSYFGKLTQSKQQQMPPP	33.4033	X;X;X;X;X;X;X;X;X;X;X;X;X;X;X;Phospho (STY);X;X;X;X;X;X;X;X;X;X;X;X;X;X;X	XXXXXXXXXXXXPPPPPPPPPPPPXXXXXXX	RSY(1)FGK	RS(-33.4)Y(33.4)FGK	yes	yes
0	-0.151455	-0.360789	0.327761	1.38909	Y	2	1	9.11e-10	176.41	136.78	O14654	656	O14654	O14654	Insulin receptor substrate 4	IRS4	GGTGGKGKSGGRFRLYFCVDRGATKECKEAK	75.2127	X;X;X;X;X;X;X;X;X;X;X;X;X;X;X;Phospho (STY);X;X;X;X;X;X;X;X;X;X;X;X;X;X;X	XXXXXXXXXXXXPPPPPPPPPXXXXXXXXXX	LY(1)FCVDR	LY(75.21)FCVDR	yes	yes
0	-0.0117829	0.170052	0.426513	0.762386	Y	3	0.999978	4.74e-36	245.96	226.29	O14654	921	O14654	O14654	Insulin receptor substrate 4	IRS4	QKPTHEQREADSSSDYVNMDFTKRESNTPAP	47.0277	X;X;X;X;X;X;X;X;X;X;X;X;X;X;X;Phospho (STY);X;X;Oxidation (M);X;X;X;X;X;X;X;X;X;X;X;X	XXXXXXXXPPPPPPPPPPPPPPPPXXXXXXX	EADSSSDY(1)VNMDFTK	EADS(-66.25)S(-56.75)S(-47.03)DY(47.03)VNMDFT(-147.19)K	yes	yes
0	-0.272884	0.0225526	-0.0740322	1.17038	Y	4	1	0.000165998	99.815	82.149	Q14847;O76041-2;Q14847-2	57;57;57	Q14847	Q14847	LIM and SH3 domain protein 1	LASP1	KNYKGYEKKPYCNAHYPKQSFTMVADTPENL	70.8572	X;X;X;X;X;X;X;X;X;X;X;X;X;X;X;Phospho (STY);X;X;X;X;X;X;X;X;X;X;X;X;X;X;X	XXXXXXXXPPPPPPPPPPXXXXXXXXXXXXX	KPYCNAHY(1)PK	KPY(-70.86)CNAHY(70.86)PK	yes	yes
0	0.302114	0.223329	0.213582	1.68643	Y	3	1	0.0164504	59.641	11.399	P07948;P07948-2	363;342	P07948	P07948	Tyrosine-protein kinase Lyn	LYN	SAQIAEGMAYIERKNYIHRDLRAANVLVSES	59.6408	X;X;X;X;X;X;X;X;X;X;X;X;X;X;X;Phospho (STY);X;X;X;X;X;X;X;X;X;X;X;X;X;X;X	XXXXXXXXXXXXXPPPPPPXXXXXXXXXXXX	KNY(1)IHR	KNY(59.64)IHR	yes	yes
0	-0.433323	-0.105769	-0.309486	1.03352	Y	3	1	1.28e-11	138.78	91.791	O95819-4;O95819-2;O95819;O95819-5;O95819-6;O95819-3	467;467;467;467;467;467	O95819-4	O95819-4	Mitogen-activated protein kinase kinase kinase kinase 4	MAP4K4	RRAEEEKRRVEREQEYIRRQLEEEQRHLEVL	138.785	X;X;X;X;X;X;X;X;X;X;X;X;X;X;X;Phospho (STY);X;X;X;X;X;X;X;X;X;X;X;X;X;X;X	XXXXXXXXXXXXPPPPPPPXXXXXXXXXXXX	EQEY(1)IRR	EQEY(138.78)IRR	yes	yes
0	-0.319425	-0.306164	-0.218745	0.615952	Y	3	1	0.00036486	93.843	81.316	Q9Y237;Q9Y237-2	122;147	Q9Y237	Q9Y237	Peptidyl-prolyl cis-trans isomerase NIMA-interacting 4	PIN4	DKPVFTDPPVKTKFGYHIIMVEGRK______	66.6031	X;X;X;X;X;X;X;X;X;X;X;X;X;X;X;Phospho (STY);X;X;X;Oxidation (M);X;X;X;X;X;X;X;X;X;X;X	XXXXXXXXXXXXXPPPPPPPPPPPPXXXXXX	FGY(1)HIIMVEGRK	FGY(66.6)HIIMVEGRK	yes	yes
0	-0.0820314	0.000250436	0.00675624	0.898197	Y	3	1	1.88e-09	158.42	131.71	Q06124-2;Q06124;Q06124-3	279;279;279	Q06124-2	Q06124-2	Tyrosine-protein phosphatase non-receptor type 11	PTPN11	SRKEGQRQENKNKNRYKNILPFDHTRVVLHD	144.832	X;X;X;X;X;X;X;X;X;X;X;X;X;X;X;Phospho (STY);X;X;X;X;X;X;X;X;X;X;X;X;X;X;X	XXXXXXXXXXXXXXXPPPPPPPPPPPXXXXX	Y(1)KNILPFDHTR	Y(144.83)KNILPFDHT(-144.83)R	yes	yes
0	0.112856	0.598631	0.0530818	2.92473	Y	3	0.999999	6.5e-11	175.15	134.68	Q06124-2;Q06124	542;546	Q06124-2	Q06124-2	Tyrosine-protein phosphatase non-receptor type 11	PTPN11	RRIEEEQKSKRKGHEYTNIKYSLADQTSGDQ	58.3352	X;X;X;X;X;X;X;X;X;X;X;X;X;X;X;Phospho (STY);X;X;X;X;X;X;X;X;X;X;X;X;X;X;X	XXXXXXXXXXPPPPPPPPPPXXXXXXXXXXX	GHEY(1)TNIK	GHEY(58.34)T(-58.34)NIK	yes	yes
0	0.132626	0.354095	0.0860763	1.26882	Y	3	1	3.83e-06	118.77	102.42	Q06124-2;Q06124	580;584	Q06124-2	Q06124-2	Tyrosine-protein phosphatase non-receptor type 11	PTPN11	PTPPCAEMREDSARVYENVGLMQQQKSFR__	118.766	X;X;X;X;X;X;X;X;X;X;X;X;X;X;X;Phospho (STY);X;X;X;X;X;Oxidation (M);X;X;X;X;X;X;X;X;X	XXXXXXXXXXXXXXPPPPPPPPPPPPXXXXX	VY(1)ENVGLMQQQK	VY(118.77)ENVGLMQQQK	yes	yes
0	0.206992	0.174315	0.514975	2.00413	Y	2	1	8.05e-05	126.52	85.074	P10586-2;P10586	1612;1621	P10586-2	P10586-2	Receptor-type tyrosine-protein phosphatase F	PTPRF	EAATCGHTEVPARNLYAHIQKLGQVPPGESV	123.983	X;X;X;X;X;X;X;X;X;X;X;X;X;X;X;Phospho (STY);X;X;X;X;X;X;X;X;X;X;X;X;X;X;X	XXXXXXXXXXXXXPPPPPPPPXXXXXXXXXX	NLY(1)AHIQK	NLY(123.98)AHIQK	yes	yes
0	0.280102	0.233736	0.472025	0.881136	Y	3	1	1.26e-05	113.69	19.928	P10586-2;P10586;P23468-3;Q13332-7;P23468-7;P23468-5;P23468-4;P23468-6;Q13332-5;P23468-2;Q13332-6;P23468;Q13332-3;Q13332-4;Q13332-2;Q13332	1372;1381;857;975;976;979;979;980;1004;1364;1384;1386;1402;1413;1413;1422	P10586-2	P10586-2	Receptor-type tyrosine-protein phosphatase F;Receptor-type tyrosine-protein phosphatase delta;Receptor-type tyrosine-protein phosphatase S	PTPRF;PTPRD;PTPRS	TWENSNLEVNKPKNRYANVIAYDHSRVILTS	80.5023	X;X;X;X;X;X;X;X;X;X;X;X;X;X;X;Phospho (STY);X;X;X;X;X;X;X;X;X;X;X;X;X;X;X	XXXXXXXXXXXXXPPPPPPPPPPPPPXXXXX	NRY(1)ANVIAYDHSR	NRY(80.5)ANVIAY(-80.5)DHS(-102.27)R	yes	yes
0	1.03533	0.611576	-0.588712	-0.145566	Y	3	0.998013	3.05e-13	175.19	156.66	P49023-2;P49023;P49023-3	88;88;88	P49023-2	P49023-2	Paxillin	PXN	SSRFIHQQPQSSSPVYGSSAKTSSVSNPQDS	29.6546	X;X;X;X;X;X;X;X;X;X;X;X;X;X;X;Phospho (STY);X;X;X;X;X;X;X;X;X;X;X;X;X;X;X	XXXPPPPPPPPPPPPPPPPPPXXXXXXXXXX	FIHQQPQSSSPVY(0.998)GS(0.001)SAK	FIHQQPQS(-42.55)S(-36.37)S(-35.91)PVY(29.65)GS(-29.65)S(-34.38)AK	yes	yes
0	0.00998551	0.316751	1.26589	1.99822	Y	3	0.998175	9.33e-37	256.67	214.14	P29353-5;P29353-3;P29353-2;P29353-7;P29353;P29353-6	213;272;317;318;427;428	P29353-5	P29353-5	SHC-transforming protein 1	SHC1	PPPPCPGRELFDDPSYVNVQNLDKARQAVGG	27.3792	X;X;X;X;X;X;X;X;X;X;X;X;X;X;X;Phospho (STY);X;X;X;X;X;X;X;X;X;X;X;X;X;X;X	XXXXXXXXPPPPPPPPPPPPPPPPPPXXXXX	ELFDDPS(0.002)Y(0.998)VNVQNLDK	ELFDDPS(-27.38)Y(27.38)VNVQNLDK	yes	yes
0	-0.0236459	-0.153519	0.215633	0.840421	Y	3	1	6.32e-05	121.74	96.968	P84022-2;P84022;O15198-2;Q15796-2;Q99717;Q15797;Q15796;O15198	44;88;92;98;89;88;128;92	P84022-2	P84022-2	Mothers against decapentaplegic homolog 3;Mothers against decapentaplegic homolog 9;Mothers against decapentaplegic homolog 2;Mothers against decapentaplegic homolog 5;Mothers against decapentaplegic homolog 1	SMAD3;SMAD9;SMAD2;SMAD5;SMAD1	GRLQVSHRKGLPHVIYCRLWRWPDLHSHHEL	121.744	X;X;X;X;X;X;X;X;X;X;X;X;X;X;X;Phospho (STY);X;X;X;X;X;X;X;X;X;X;X;X;X;X;X	XXXXXXXXXPPPPPPPPPXXXXXXXXXXXXX	GLPHVIY(1)CR	GLPHVIY(121.74)CR	yes	yes
0	0.408297	0.129245	0.695592	3.15327	Y	3	0.996032	0.000207779	110.76	68.566	Q9BZV1-2;Q9BZV1	283;336	Q9BZV1-2	Q9BZV1-2	UBX domain-containing protein 6	UBXN6	AMREKEEQRGLRKYNYTLLRVRLPDGCLLQG	24.0861	X;X;X;X;X;X;X;X;X;X;X;X;X;X;X;Phospho (STY);X;X;X;X;X;X;X;X;X;X;X;X;X;X;X	XXXXXXXXXXXXPPPPPPPPXXXXXXXXXXX	KYNY(0.996)T(0.004)LLR	KY(-40.94)NY(24.09)T(-24.09)LLR	yes	yes
0	-0.0447232	0.067668	0.106313	0.774109	Y	3	1	0.00484977	88.734	42.383	O15144	261	O15144	O15144	Actin-related protein 2/3 complex subunit 2	ARPC2	TFRDYLHYHIKCSKAYIHTRMRAKTSDFLKV	72.1944	X;X;X;X;X;X;X;X;X;X;X;X;X;X;X;Phospho (STY);X;X;X;X;X;X;X;X;X;X;X;X;X;X;X	XXXXXXXXXXXXXXPPPPPPXXXXXXXXXXX	AY(1)IHTR	AY(72.19)IHT(-72.19)R	yes
0	0.396471	0.735887	1.31355	2.7485	Y	2	1	0.00238145	102.98	75.663	Q9BSB4	164	Q9BSB4	Q9BSB4	Autophagy-related protein 101	ATG101	CEKIINIVEVMNRHEYLPKMPTQSEVDNVFD	102.98	X;X;X;X;X;X;X;X;X;X;X;X;X;X;X;Phospho (STY);X;X;X;X;X;X;X;X;X;X;X;X;X;X;X	XXXXXXXXXXXXXPPPPPPXXXXXXXXXXXX	HEY(1)LPK	HEY(102.98)LPK	yes
0	-0.120343	-0.651034	0.378653	1.99989	Y	3	0.998701	8.92e-09	147.62	127.04	Q04656-5;Q04656;Q04656-2;Q04656-3	594;594;608;675	Q04656-5	Q04656-5	Copper-transporting ATPase 1	ATP7A	VHKIESSLTKHRGILYCSVALATNKAHIKYD	28.8579	X;X;X;X;X;X;X;X;X;X;X;X;X;X;X;Phospho (STY);X;X;X;X;X;X;X;X;X;X;X;X;X;X;X	XXXXXXXXXXXXPPPPPPPPPPPPPXXXXXX	GILY(0.999)CS(0.001)VALATNK	GILY(28.86)CS(-28.86)VALAT(-130.38)NK	yes
0	0.0833905	0.132958	0.385899	0.947958	Y	3	1	0.000739388	90.827	73.007	Q96GD4-3;Q9UQB9-2;Q9UQB9-3;Q96GD4-4;Q9UQB9;Q96GD4;Q96GD4-5;O14965	93;24;39;51;58;92;93;148	Q96GD4-3	Q96GD4-3	Aurora kinase B;Aurora kinase C;Aurora kinase A	AURKB;AURKC;AURKA	FEIGRPLGKGKFGNVYLAREKKSHFIVALKV	90.827	X;X;X;X;X;X;X;X;X;X;X;X;X;X;X;Phospho (STY);X;X;X;X;X;X;X;X;X;X;X;X;X;X;X	XXXXXXXXXPPPPPPPPPPXXXXXXXXXXXX	GKFGNVY(1)LAR	GKFGNVY(90.83)LAR	yes
0	0.955519	0.716628	0.857878	0.84193	Y	4	0.994736	0.0125818	50.865	46.067	Q9Y276	181	Q9Y276	Q9Y276	Mitochondrial chaperone BCS1	BCS1L	TVMYTAVGSEWRPFGYPRRRRPLNSVVLQQG	23.4406	X;X;Oxidation (M);X;X;X;X;X;X;X;X;X;X;X;X;Phospho (STY);X;X;X;X;X;X;X;X;X;X;X;X;X;X;X	PPPPPPPPPPPPPPPPPPXXXXXXXXXXXXX	ELALQQEEGKTVMYTAVGS(0.005)EWRPFGY(0.995)PR	ELALQQEEGKT(-40.44)VMY(-34.84)T(-34.62)AVGS(-23.44)EWRPFGY(23.44)PR	yes
0	-0.043898	0.0387814	0.413461	1.52296	Y	3	1	9.43e-05	101.71	86.122	P41223;P41223-2	97;97	P41223	P41223	Protein BUD31 homolog	BUD31	GYADKNLIAKWKKQGYENLCCLRCIQTRDTN	101.712	X;X;X;X;X;X;X;X;X;X;X;X;X;X;X;Phospho (STY);X;X;X;X;X;X;X;X;X;X;X;X;X;X;X	XXXXXXXXXXXXPPPPPPPPPPPXXXXXXXX	KQGY(1)ENLCCLR	KQGY(101.71)ENLCCLR	yes
0	-0.124326	0.341369	0.439445	2.5761	Y	3	1	0.0399999	40.103	31.763	Q9Y5K6	273	Q9Y5K6	Q9Y5K6	CD2-associated protein	CD2AP	EITKTDTEGKIKAKEYCRTLFAYEGTNEDEL	40.1031	X;X;X;X;X;X;X;X;X;X;X;X;X;X;X;Phospho (STY);X;X;X;X;X;X;X;X;X;X;X;X;X;X;X	XXXXXXXXXXXXPPPPPPXXXXXXXXXXXXX	AKEY(1)CR	AKEY(40.1)CR	yes
0	0.328289	0.00089521	0.611189	0.188243	Y	2	1	0.00286902	79.713	75.593	P60606	79	P60606	P60606	Cortexin-1	CTXN1	SWTDHKEALERGQFDYALV____________	79.7126	X;X;X;X;X;X;X;X;X;X;X;X;X;X;X;Phospho (STY);X;X;X;X;X;X;X;X;X;X;X;X;X;X;X	XXXXXXXXXXXPPPPPPPPXXXXXXXXXXXX	GQFDY(1)ALV	GQFDY(79.71)ALV	yes
0	0.420346	1.18387	0.0226818	0.623698	Y	4	0.996432	2.02e-13	167.92	143.44	Q8N8Z6	621	Q8N8Z6	Q8N8Z6	Discoidin, CUB and LCCL domain-containing protein 1	DCBLD1	ERHVLRAHTFSAQSGYRVPGPQPGHKHSLSS	24.4607	X;X;X;X;X;X;X;X;X;X;X;X;X;X;X;Phospho (STY);X;X;X;X;X;X;X;X;X;X;X;X;X;X;X	XXXXXXPPPPPPPPPPPPPPPPPPPPXXXXX	AHTFSAQS(0.004)GY(0.996)RVPGPQPGHK	AHT(-93.36)FS(-73.66)AQS(-24.46)GY(24.46)RVPGPQPGHK	yes
0	-0.0379769	0.103115	-0.338048	0.616377	Y	3	0.99914	0.000420602	90.422	74.908	Q12959-8;Q12959-9;Q12959-5;Q12959-3;Q12959-6;Q12959-4;Q12959;Q12959-7;Q12959-2	644;656;709;727;747;749;760;773;782	Q12959-8	Q12959-8	Disks large homolog 1	DLG1	HTTRPKRDYEVDGRDYHFVTSREQMEKDIQE	32.8267	X;X;X;X;X;X;X;X;X;X;X;X;X;X;X;Phospho (STY);X;X;X;X;X;X;X;X;X;X;X;X;X;X;X	XXXXXXPPPPPPPPPPPPPPPPXXXXXXXXX	RDYEVDGRDY(0.999)HFVT(0.001)SR	RDY(-37.56)EVDGRDY(32.83)HFVT(-32.83)S(-37.85)R	yes
0	-0.103424	0.609575	0.658891	3.07344	Y	2	1	0.00136961	104.06	47.547	Q8TDM6-2;Q8TDM6-4;Q8TDM6	188;78;188	Q8TDM6-2	Q8TDM6-2	Disks large homolog 5	DLG5	GTAFDKRPYHRLNPDYERLKIQCVRAMSDLQ	104.057	X;X;X;X;X;X;X;X;X;X;X;X;X;X;X;Phospho (STY);X;X;X;X;X;X;X;X;X;X;X;X;X;X;X	XXXXXXXXXXXPPPPPPPXXXXXXXXXXXXX	LNPDY(1)ER	LNPDY(104.06)ER	yes
0	0.353017	0.243906	-0.240937	0.626273	Y	3	0.883164	0.0121802	65.278	51.877	Q9H7D0	1827	Q9H7D0	Q9H7D0	Dedicator of cytokinesis protein 5	DOCK5	AATPVPPPPPPKSKPYEGSQRNSTELAPPLP	8.84607	X;X;X;X;X;X;X;X;X;X;X;X;X;X;X;Phospho (STY);X;X;X;X;X;X;X;X;X;X;X;X;X;X;X	XXXXXXXXXXXXPPPPPPPPPXXXXXXXXXX	S(0.002)KPY(0.883)EGS(0.115)QR	S(-27.31)KPY(8.85)EGS(-8.85)QR	yes
0	0.401966	0.422856	0.186675	1.43536	Y	3	0.996179	2.24e-12	173.19	147.07	Q5VTE0;P68104;Q05639	141;141;141	Q5VTE0	Q5VTE0	Putative elongation factor 1-alpha-like 3;Elongation factor 1-alpha 1;Elongation factor 1-alpha 2	EEF1A1P5;EEF1A1;EEF1A2	GISKNGQTREHALLAYTLGVKQLIVGVNKMD	24.162	X;X;X;X;X;X;X;X;X;X;X;X;X;X;X;Phospho (STY);X;X;X;X;X;X;X;X;X;X;X;X;X;X;X	XXXXXXXXXPPPPPPPPPPPPXXXXXXXXXX	EHALLAY(0.996)T(0.004)LGVK	EHALLAY(24.16)T(-24.16)LGVK	yes
0	0.0276262	0.35115	0.269801	1.34165	Y	2	0.998942	3.71e-06	141.88	106.58	Q12929;Q12929-2	774;514	Q12929	Q12929	Epidermal growth factor receptor kinase substrate 8	EPS8	NKDELRTVCPEGARVYSQITVQKAALEDSSG	29.7493	X;X;X;X;X;X;X;X;X;X;X;X;X;X;X;Phospho (STY);X;X;X;X;X;X;X;X;X;X;X;X;X;X;X	XXXXXXXXXXXXXXPPPPPPPPPXXXXXXXX	VY(0.999)S(0.001)QITVQK	VY(29.75)S(-29.75)QIT(-72.3)VQK	yes
0	0.0102097	-0.144177	0.0493898	0.700036	Y	3	1	0.000287028	120.65	90.033	Q5RKV6	40	Q5RKV6	Q5RKV6	Exosome complex component MTR3	EXOSC6	EEAPGTRDPTRLRPVYARAGLLSQAKGSAYL	120.645	X;X;X;X;X;X;X;X;X;X;X;X;X;X;X;Phospho (STY);X;X;X;X;X;X;X;X;X;X;X;X;X;X;X	XXXXXXXXXXXPPPPPPPXXXXXXXXXXXXX	LRPVY(1)AR	LRPVY(120.65)AR	yes
0	0.0861502	0.170548	0.470518	0.862433	Y	2	0.999576	0.000234112	121.05	49.669	P81408-2;P81408-3;P81408;P81408-4	265;343;361;362	P81408-2	P81408-2	Protein FAM189B	FAM189B	DSCLLELQGSVRSVDYVLFRSIQRSRAGYCL	33.7259	X;X;X;X;X;X;X;X;X;X;X;X;X;X;X;Phospho (STY);X;X;X;X;X;X;X;X;X;X;X;X;X;X;X	XXXXXXXXXXXXPPPPPPPPXXXXXXXXXXX	SVDY(1)VLFR	S(-33.73)VDY(33.73)VLFR	yes
0	0.116356	0.230376	0.0945528	0.604391	Y	3	1	1.85e-05	109.16	92.134	Q86XX4;Q86XX4-2	3966;3970	Q86XX4	Q86XX4	Extracellular matrix protein FRAS1	FRAS1	PKRHPDRVEKNVNRHYCTVRNVNILSEPEAA	66.0538	X;X;X;X;X;X;X;X;X;X;X;X;X;X;X;Phospho (STY);X;X;X;X;X;X;X;X;X;X;X;X;X;X;X	XXXXXXXXXXPPPPPPPPPPXXXXXXXXXXX	HY(1)CTVR	HY(66.05)CT(-66.05)VR	yes
0	-0.277004	-0.0443601	0.321192	0.829446	Y	3	1	5.29e-09	145.81	120.96	Q8WU20	471	Q8WU20	Q8WU20	Fibroblast growth factor receptor substrate 2	FRS2	PTTPLPQTPTRRTELYAVIDIERTAAMSNLQ	66.1762	X;X;X;X;X;X;X;X;X;X;X;X;X;X;X;Phospho (STY);X;X;X;X;X;X;X;X;X;X;X;X;X;X;X	XXXXXXXXXXXPPPPPPPPPPPPXXXXXXXX	RTELY(1)AVIDIER	RT(-66.18)ELY(66.18)AVIDIER	yes
0	0.507056	0.315724	0.324179	0.789227	Y	3	0.853206	0.037533	42.336	22.129	Q8N1G2	258	Q8N1G2	Q8N1G2	Cap-specific mRNA (nucleoside-2'-O-)-methyltransferase 1	FTSJD2	MDFVFDRMFTNPRDSYGKPLVKDREAELLYF	7.64347	X;X;X;X;X;X;X;X;X;X;X;X;X;X;X;Phospho (STY);X;X;X;X;X;X;X;X;X;X;X;X;X;X;X	XXXXXXXXXXXXXPPPPPPPPPXXXXXXXXX	DS(0.147)Y(0.853)GKPLVK	DS(-7.64)Y(7.64)GKPLVK	yes
0	0.219923	0.0143057	0.0801626	0.669652	Y	3	0.981079	2.49e-05	108.7	78.512	P11413;P11413-3;P11413-2	401;431;447	P11413	P11413	Glucose-6-phosphate 1-dehydrogenase	G6PD	KRNELVIRVQPNEAVYTKMMTKKPGMFFNPE	17.1475	X;X;X;X;X;X;X;X;X;X;X;X;X;X;X;Phospho (STY);X;X;X;X;X;X;X;X;X;X;X;X;X;X;X	XXXXXXXXPPPPPPPPPPXXXXXXXXXXXXX	VQPNEAVY(0.981)T(0.019)K	VQPNEAVY(17.15)T(-17.15)K	yes
0	-0.114665	0.128851	0.0075131	0.65419	Y	2	0.951198	0.00301695	78.149	29.588	P22102-2;P22102	348;348	P22102-2	P22102-2	Trifunctional purine biosynthetic protein adenosine-3;Phosphoribosylamine--glycine ligase;Phosphoribosylformylglycinamidine cyclo-ligase;Phosphoribosylglycinamide formyltransferase	GART	TALTVVMASKGYPGDYTKGVEITGFPEAQAL	12.9027	X;X;X;X;X;X;X;X;X;X;X;X;X;X;X;Phospho (STY);X;X;X;X;X;X;X;X;X;X;X;X;X;X;X	XXXXXXXXXXPPPPPPPPXXXXXXXXXXXXX	GYPGDY(0.951)T(0.049)K	GY(-42.88)PGDY(12.9)T(-12.9)K	yes
0	0.0724121	0.0298643	0.0794963	0.615014	Y	4	0.994262	9.89e-06	116.96	107.67	P36383	356	P36383	P36383	Gap junction gamma-1 protein	GJC1	EIRMAQERLDLAVQAYSHQNNPHGPREKKAK	22.3871	X;X;X;X;X;X;X;X;X;X;X;X;X;X;X;Phospho (STY);X;X;X;X;X;X;X;X;X;X;X;X;X;X;X	XXXXXXXXPPPPPPPPPPPPPPPPPPXXXXX	LDLAVQAY(0.994)S(0.006)HQNNPHGPR	LDLAVQAY(22.39)S(-22.39)HQNNPHGPR	yes
0	0.0441936	0.535759	0.775631	2.83666	Y	3	1	3.78e-09	152.7	130.12	P81274	146	P81274	P81274	G-protein-signaling modulator 2	GPSM2	ISRELNDKVGEARALYNLGNVYHAKGKSFGC	88.1124	X;X;X;X;X;X;X;X;X;X;X;X;X;X;X;Phospho (STY);X;X;X;X;X;X;X;X;X;X;X;X;X;X;X	XXXXXXXXXXXXXPPPPPPPPPPPPXXXXXX	ALY(1)NLGNVYHAK	ALY(88.11)NLGNVY(-88.11)HAK	yes
0	0.653943	0.557879	0.0977658	0.372431	Y	3	1	2.26e-06	139.02	82.586	Q6NXT2;Q71DI3;Q16695;P84243;P68431	41;42;42;42;42	Q6NXT2	Q6NXT2	Histone H3.3C;Histone H3.2;Histone H3.1t;Histone H3.3;Histone H3.1	H3F3C;HIST2H3A;HIST3H3;H3F3A;HIST1H3A	ARKSTPSTCGVKPHRYRPGTVALREIRRYQK	75.4862	X;X;X;X;X;X;X;X;X;X;X;X;X;X;X;Phospho (STY);X;X;X;X;X;X;X;X;X;X;X;X;Phospho (STY);X;X	XXXXXXXXXXXXXXXPPPPPPPPPXXXXXXX	Y(1)RPGTVALR	Y(75.49)RPGT(-75.49)VALR	yes
0	0.25717	0.404665	0.968842	2.4015	Y	3	1	1.17e-06	128.85	92.43	Q00341-2;Q00341	404;437	Q00341-2	Q00341-2	Vigilin	HDLBP	EQIEGMVKDLINRMDYVEINIDHKFHRHLIG	128.847	X;X;X;X;X;X;X;X;X;X;X;X;X;Oxidation (M);X;Phospho (STY);X;X;X;X;X;X;X;X;X;X;X;X;X;X;X	XXXXXXXXXXXXXPPPPPPPPPPPXXXXXXX	MDY(1)VEINIDHK	MDY(128.85)VEINIDHK	yes
0	0.750391	0.270705	0.328985	0.209372	Y	3	1	0.0172754	56.432	36.993	Q99878;Q96KK5;Q9BTM1;Q16777;Q93077;Q8IUE6;Q6FI13;P0C0S8;Q96QV6;Q9BTM1-2	40;40;40;40;40;40;40;40;40;40	Q99878	Q99878	Histone H2A type 1-J;Histone H2A type 1-H;Histone H2A.J;Histone H2A type 2-C;Histone H2A type 1-C;Histone H2A type 2-B;Histone H2A type 2-A;Histone H2A type 1;Histone H2A type 1-A	HIST1H2AJ;HIST1H2AH;H2AFJ;HIST2H2AC;HIST1H2AC;HIST2H2AB;HIST2H2AA3;HIST1H2AG;HIST1H2AA	QFPVGRVHRLLRKGNYAERVGAGAPVYLAAV	56.4315	X;X;X;X;X;X;X;X;X;X;X;X;X;X;X;Phospho (STY);X;X;X;X;X;X;X;X;X;X;X;X;X;X;X	XXXXXXXXXXXXPPPPPPPXXXXXXXXXXXX	KGNY(1)AER	KGNY(56.43)AER	yes
0	3.31035	1.52838	0.0985577	4.43181	Y	3	1	0.0025718	81.381	61.745	O60814;Q8N257;Q16778;P33778;P23527;Q99880;Q99879;Q99877;Q93079;Q5QNW6;P62807;P58876;Q5QNW6-2	84;84;84;84;84;84;84;84;84;84;84;84;84	O60814;Q8N257;Q99880	Q99880	Histone H2B type 1-K;Histone H2B type 3-B;Histone H2B type 2-E;Histone H2B type 1-B;Histone H2B type 1-O;Histone H2B type 1-L;Histone H2B type 1-M;Histone H2B type 1-N;Histone H2B type 1-H;Histone H2B type 2-F;Histone H2B type 1-C/E/F/G/I;Histone H2B type 1-D	HIST1H2BK;HIST3H2BB;HIST2H2BE;HIST1H2BB;HIST1H2BO;HIST1H2BL;HIST1H2BM;HIST1H2BN;HIST1H2BH;HIST2H2BF;HIST1H2BC;HIST1H2BD	DIFERIAGEASRLAHYNKRSTITSREIQTAV;DIFERIASEASRLAHYNKRSTITSREIQTAV;DIFERIASEASRLAHYNKRSTITSREVQTAV	81.3812	X;X;X;X;X;X;X;X;X;X;X;X;X;X;X;Phospho (STY);X;X;X;X;X;X;X;X;X;X;X;X;X;X;X	XXXXXXXXXXXXPPPPPPPXXXXXXXXXXXX	LAHY(1)NKR	LAHY(81.38)NKR	yes
0	0.265255	0.54409	-0.420591	1.37797	Y	3	1	0.0022076	76.221	54.774	Q14103-4;Q14103-3;Q14103-2;Q14103	225;244;225;244	Q14103-4	Q14103-4	Heterogeneous nuclear ribonucleoprotein D0	HNRNPD	TFKEEEPVKKIMEKKYHNVGLSKCEIKVAMS	73.5421	X;X;X;X;X;X;X;X;X;X;X;X;X;X;X;Phospho (STY);X;X;X;X;X;X;X;X;X;X;X;X;X;X;X	XXXXXXXXXXXXXXXPPPPPPPPXXXXXXXX	Y(1)HNVGLSK	Y(73.54)HNVGLS(-73.54)K	yes
0	0.763254	0.246162	0.34878	0.509	Y	2	0.996423	7.93e-09	145.91	130.07	P10809	223	P10809	P10809	60 kDa heat shock protein, mitochondrial	HSPD1	NDELEIIEGMKFDRGYISPYFINTSKGQKCE	24.4495	X;X;X;X;X;X;X;X;X;X;X;X;X;X;X;Phospho (STY);X;X;X;X;X;X;X;X;X;X;X;X;X;X;X	XXXXXXXXXXXXXXPPPPPPPPPPPPXXXXX	GY(0.996)IS(0.004)PYFINTSK	GY(24.45)IS(-24.45)PY(-68.99)FINT(-85.49)S(-90.92)K	yes
0	0.0889627	-0.117993	0.230584	0.619802	Y	3	0.830018	5.77e-06	121.44	111.75	Q9BY32-3;Q9BY32-2;Q9BY32	72;96;113	Q9BY32-3	Q9BY32-3	Inosine triphosphate pyrophosphatase	ITPA	EGLHQLLAGFEDKSAYALCTFALSTGDPSQP	6.88761	X;X;X;X;X;X;X;X;X;X;X;X;X;X;X;Phospho (STY);X;X;X;X;X;X;X;X;X;X;X;X;X;X;X	XXXXXXXXXXXXXPPPPPPPPPPPPPPPPPP	S(0.17)AY(0.83)ALCTFALSTGDPSQPVR	S(-6.89)AY(6.89)ALCT(-44.36)FALS(-98.14)T(-102.5)GDPS(-116.31)QPVR	yes
0	0.124178	0.528667	0.255092	2.53779	Y	3	0.929212	0.00100616	89.698	53.303	Q96CX2	271	Q96CX2	Q96CX2	BTB/POZ domain-containing protein KCTD12	KCTD12	SRDPDRPPERYTSRYYLKFNFLEQAFDKLSE	11.1819	X;X;X;X;X;X;X;X;X;X;X;X;X;X;X;Phospho (STY);X;X;X;X;X;X;X;X;X;X;X;X;X;X;X	XXXXXXXXXXPPPPPPPPXXXXXXXXXXXXX	YTSRY(0.071)Y(0.929)LK	Y(-63.31)T(-62.44)S(-53.14)RY(-11.18)Y(11.18)LK	yes
0	0.0979649	0.262012	0.10793	0.724189	Y	2	0.999967	0.00138487	103.75	74.85	Q9BXB1-2;Q9BXB1	908;932	Q9BXB1-2	Q9BXB1-2	Leucine-rich repeat-containing G-protein coupled receptor 4	LGR4	SDSSDQVQACGRACFYQSRGFPLVRYAYNLP	44.7671	X;X;X;X;X;X;X;X;X;X;X;X;X;X;X;Phospho (STY);X;X;X;X;X;X;X;X;X;X;X;X;X;X;X	XXXXXXXXXXXXPPPPPPPXXXXXXXXXXXX	ACFY(1)QSR	ACFY(44.77)QS(-44.77)R	yes
0	0.0153673	-0.0178105	0.416626	0.768255	Y	3	0.999332	5.86e-39	269.16	240.48	P27361-2;P27361-3;P27361	204;204;204	P27361-2	P27361-2	Mitogen-activated protein kinase 3	MAPK3	RIADPEHDHTGFLTEYVATRWYRAPEIMLNS	32.9936	X;X;X;X;X;X;X;X;X;X;X;X;X;X;X;Phospho (STY);X;X;X;X;X;X;X;X;X;X;X;X;X;X;X	XPPPPPPPPPPPPPPPPPPPXXXXXXXXXXX	IADPEHDHTGFLT(0.001)EY(0.999)VATR	IADPEHDHT(-123.32)GFLT(-32.99)EY(32.99)VAT(-37.79)R	yes
0	-0.0327809	0.197165	0.336834	0.637518	Y	3	0.99994	4.84e-06	119.39	87.091	P56270-3;P56270;P56270-2	167;190;190	P56270-3	P56270-3	Myc-associated zinc finger protein	MAZ	PVASALEKKTKSKGPYICALCAKEFKNGYNL	42.2012	X;X;X;X;X;X;X;X;X;X;X;X;X;X;X;Phospho (STY);X;X;X;X;X;X;X;X;X;X;X;X;X;X;X	XXXXXXXXXXXPPPPPPPPPPPPXXXXXXXX	SKGPY(1)ICALCAK	S(-42.2)KGPY(42.2)ICALCAK	yes
0	0.679039	0.447938	0.924577	0.943885	Y	3	0.999998	0.000144842	122.18	94.859	Q9UJV3-2;Q9UJV3	81;81	Q9UJV3-2	Q9UJV3-2	Probable E3 ubiquitin-protein ligase MID2	MID2	ESIEPITAFQCPTCRYVISLNHRGLDGLKRN	56.9239	X;X;X;X;X;X;X;X;X;X;X;X;X;X;X;Phospho (STY);X;X;X;X;X;X;X;X;X;X;X;X;X;X;X	XXXXXXXXXXXXXXXPPPPPPPPXXXXXXXX	Y(1)VISLNHR	Y(56.92)VIS(-56.92)LNHR	yes
0	0.641247	0.307095	0.18384	1.73237	Y	3	0.998969	1.36e-05	137.18	76.391	Q9BRT2	67	Q9BRT2	Q9BRT2	Mitochondrial nucleoid factor 1	MNF1	ACDQMYESLARLHSNYYKHKYPRPRDTSFSG	29.862	X;X;X;X;X;X;X;X;X;X;X;X;X;X;X;Phospho (STY);X;X;X;X;X;X;X;X;X;X;X;X;X;X;X	XXXXXXXXXXXPPPPPPPXXXXXXXXXXXXX	LHSNY(0.999)Y(0.001)K	LHS(-68.26)NY(29.86)Y(-29.86)K	yes
0	0.0966919	0.0728582	-0.343372	1.17338	Y	3	0.999933	9.72e-07	130.29	112.28	Q8N3R9-2;Q8N3R9	494;528	Q8N3R9-2	Q8N3R9-2	MAGUK p55 subfamily member 5	MPP5	HTTRSRRDQEVAGRDYHFVSRQAFEADIAAG	41.7335	X;X;X;X;X;X;X;X;X;X;X;X;X;X;X;Phospho (STY);X;X;X;X;X;X;X;X;X;X;X;X;X;X;X	XXXXXXXPPPPPPPPPPPPPPXXXXXXXXXX	DQEVAGRDY(1)HFVSR	DQEVAGRDY(41.73)HFVS(-41.73)R	yes
0	0.014091	0.0461753	-0.0268319	0.743113	Y	3	0.999993	0.000228294	116.54	85.978	Q9NWU5-2;Q9NWU5-3;Q9NWU5	79;85;165	Q9NWU5-2	Q9NWU5-2	39S ribosomal protein L22, mitochondrial	MRPL22	IRYHGRGRFGIMEKVYCHYFVKLVEGPPPPP	51.7849	X;X;X;X;X;X;X;X;X;X;X;X;X;X;X;Phospho (STY);X;X;X;X;X;X;X;X;X;X;X;X;X;X;X	XXXXXXXXXXXXXXPPPPPPPPXXXXXXXXX	VY(1)CHYFVK	VY(51.78)CHY(-51.78)FVK	yes
0	-0.152467	-0.183	0.10733	1.24973	Y	2	0.959723	0.0122724	75.269	38.24	Q6T4R5-4;Q6T4R5-3;Q6T4R5-2;Q6T4R5	24;25;202;202	Q6T4R5-4	Q6T4R5-4	Nance-Horan syndrome protein	NHS	LAAVSNLDIESKLSVYYRAPWHQQRNIFLPA	13.7743	X;X;X;X;X;X;X;X;X;X;X;X;X;X;X;Phospho (STY);X;X;X;X;X;X;X;X;X;X;X;X;X;X;X	XXXXXXXXXXXXPPPPPPXXXXXXXXXXXXX	LSVY(0.96)Y(0.04)R	LS(-44.82)VY(13.77)Y(-13.77)R	yes
0	0.316068	0.218555	-0.0291371	0.863834	Y	3	0.933812	0.00131887	86.189	73.152	Q9H857-4;Q9H857;Q9H857-3;Q9H857-2	327;457;469;494	Q9H857-4	Q9H857-4	5'-nucleotidase domain-containing protein 2	NT5DC2	NAQFGSIFRTFHNPTYFSRRLVRFSDLYMAS	12.3478	X;X;X;X;X;X;X;X;X;X;X;X;X;X;X;Phospho (STY);X;X;X;X;X;X;X;X;X;X;X;X;X;X;X	XXXXXXXXXPPPPPPPPPPXXXXXXXXXXXX	TFHNPT(0.054)Y(0.934)FS(0.012)R	T(-74.73)FHNPT(-12.35)Y(12.35)FS(-18.98)R	yes
0	0.219935	0.473002	0.240654	2.45481	Y	3	1	0.00656821	81.1	48.986	P04181	133	P04181	P04181	Ornithine aminotransferase, mitochondrial;Ornithine aminotransferase, hepatic form;Ornithine aminotransferase, renal form	OAT	NVLGEYEEYITKLFNYHKVLPMNTGVEAGET	81.0998	X;X;X;X;X;X;X;X;X;X;X;X;X;X;X;Phospho (STY);X;X;X;X;X;X;X;X;X;X;X;X;X;X;X	XXXXXXXXXXXXPPPPPPXXXXXXXXXXXXX	LFNY(1)HK	LFNY(81.1)HK	yes
0	0.183704	0.111151	0.320034	1.13762	Y	2	1	0.00170325	109.7	64.758	P11940-2;P11940;Q9H361	262;262;262	P11940-2	P11940-2	Polyadenylate-binding protein 1;Polyadenylate-binding protein 3	PABPC1;PABPC3	AVDEMNGKELNGKQIYVGRAQKKVERQTELK	109.704	X;X;X;X;X;X;X;X;X;X;X;X;X;X;X;Phospho (STY);X;X;X;X;X;X;X;X;X;X;X;X;X;X;X	XXXXXXXXXXXXXPPPPPPXXXXXXXXXXXX	QIY(1)VGR	QIY(109.7)VGR	yes
0	0.66586	0.195427	0.863718	1.128	Y	3	0.935103	0.035117	40.941	21.81	P11940-2;P11940;Q9H361	364;364;364	P11940-2	P11940-2	Polyadenylate-binding protein 1;Polyadenylate-binding protein 3	PABPC1;PABPC3	AVTEMNGRIVATKPLYVALAQRKEERQAHLT	11.5863	X;X;X;X;X;X;X;X;X;X;X;X;X;X;X;Phospho (STY);X;X;X;X;X;X;X;X;X;X;X;X;X;X;X	XXXXXXXXPPPPPPPPPPPPPPXXXXXXXXX	IVAT(0.065)KPLY(0.935)VALAQR	IVAT(-11.59)KPLY(11.59)VALAQR	yes
0	0.0885953	-0.0879291	0.22825	0.846727	Y	3	0.9672	3.38e-13	173.03	145.26	P11940-2;P11940;Q13310-2;Q13310;Q13310-3	54;54;54;54;54	P11940-2;Q13310-2	P11940-2	Polyadenylate-binding protein 1;Polyadenylate-binding protein 4	PABPC1;PABPC4	SIRVCRDMITRRSLGYAYVNFQQPADAERAL	16.5405	X;X;X;X;X;X;X;X;X;X;X;X;X;X;X;Phospho (STY);X;X;X;X;X;X;X;X;X;X;X;X;X;X;X	XXXXXXXXXXXXPPPPPPPPPPPPPPPPPXX	S(0.021)LGY(0.967)AY(0.011)VNFQQPADAER	S(-16.54)LGY(16.54)AY(-19.31)VNFQQPADAER	yes
0	-0.346464	-0.25718	-0.0305852	0.720285	Y	3	0.999988	1.9e-08	134.88	122.97	Q13310-2;Q13310;Q13310-3	364;364;364	Q13310-2	Q13310-2	Polyadenylate-binding protein 4	PABPC4	AVTEMNGRIVGSKPLYVALAQRKEERKAHLT	49.0475	X;X;X;X;X;X;X;X;X;X;X;X;X;X;X;Phospho (STY);X;X;X;X;X;X;X;X;X;X;X;X;X;X;X	XXXXXXXXPPPPPPPPPPPPPPXXXXXXXXX	IVGSKPLY(1)VALAQR	IVGS(-49.05)KPLY(49.05)VALAQR	yes
0	-0.0670975	-0.00587767	0.0613326	0.979482	Y	3	1	1.36e-14	186.13	157.51	Q8TEW0-5;Q8TEW0-3;Q8TEW0-7;Q8TEW0-6;Q8TEW0-4;Q8TEW0-11;Q8TEW0-2;Q8TEW0;Q8TEW0-9;Q8TEW0-10;Q8TEW0-8	445;445;489;489;489;489;489;489;489;489;489	Q8TEW0-5	Q8TEW0-5	Partitioning defective 3 homolog	PARD3	SITSRDVTIGGSAPIYVKNILPRGAAIQDGR	73.6833	X;X;X;X;X;X;X;X;X;X;X;X;X;X;X;Phospho (STY);X;X;X;X;X;X;X;X;X;X;X;X;X;X;X	XXXXXPPPPPPPPPPPPPXXXXXXXXXXXXX	DVTIGGSAPIY(1)VK	DVT(-102.29)IGGS(-73.68)APIY(73.68)VK	yes
0	0.320966	-0.147876	0.171889	0.92461	Y	2	0.99711	0.0244931	64.64	21.198	Q9UGN5-2;Q9UGN5	460;473	Q9UGN5-2	Q9UGN5-2	Poly [ADP-ribose] polymerase 2	PARP2	GKGIYFADMSSKSANYCFASRLKNTGLLLLS	25.4608	X;X;X;X;X;X;X;X;X;X;X;X;X;X;X;Phospho (STY);X;X;X;X;X;X;X;X;X;X;X;X;X;X;X	XXXXXXXXXXXXPPPPPPPPPXXXXXXXXXX	S(0.003)ANY(0.997)CFASR	S(-25.46)ANY(25.46)CFAS(-42.61)R	yes
0	0.704865	0.200645	0.622755	0.702511	Y	2	1	0.00138068	103.83	55.984	P00558-2;P00558	168;196	P00558-2	P00558-2	Phosphoglycerate kinase 1	PGK1	LPQKAGGFLMKKELNYFAKALESPERPFLAI	103.833	X;X;X;X;X;X;X;X;X;X;X;X;X;X;X;Phospho (STY);X;X;X;X;X;X;X;X;X;X;X;X;X;X;X	XXXXXXXXXXXXPPPPPPPXXXXXXXXXXXX	ELNY(1)FAK	ELNY(103.83)FAK	yes
0	0.454263	1.17699	1.99374	1.89588	Y	3	0.978429	0.0108199	65.627	43.776	O15173;O15173-2	196;220	O15173	O15173	Membrane-associated progesterone receptor component 2	PGRMC2	ESVREWEMQFKEKYDYVGRLLKPGEEPSEYT	16.5666	X;X;X;X;X;X;X;X;X;X;X;X;X;X;X;Phospho (STY);X;X;X;X;X;X;X;X;X;X;X;X;X;X;X	XXXXXXXXXXXPPPPPPPPXXXXXXXXXXXX	EKY(0.022)DY(0.978)VGR	EKY(-16.57)DY(16.57)VGR	yes
0	-0.107318	0.0564154	0.0813409	0.702076	Y	2	0.999989	3.39e-24	220.21	198.53	O00459	464	O00459	O00459	Phosphatidylinositol 3-kinase regulatory subunit beta	PIK3R2	YHQQYQDKSREYDQLYEEYTRTSQELQMKRT	49.6643	X;X;X;X;X;X;X;X;X;X;X;X;X;X;X;Phospho (STY);X;X;X;X;X;X;X;X;X;X;X;X;X;X;X	XXXXXXXXPPPPPPPPPPPPPXXXXXXXXXX	EYDQLY(1)EEYTR	EY(-73.21)DQLY(49.66)EEY(-49.66)T(-75.11)R	yes
0	-0.0380614	0.301411	0.341131	1.24479	Y	3	0.999998	1.05e-07	132.79	113.33	Q92569-3;Q92569-2;Q92569	163;199;199	Q92569-3	Q92569-3	Phosphatidylinositol 3-kinase regulatory subunit gamma	PIK3R3	YHSQYQEKSKEYDRLYEEYTRTSQEIQMKRT	58.9091	X;X;X;X;X;X;X;X;X;X;X;X;X;X;X;Phospho (STY);X;X;X;X;X;X;X;X;X;X;X;X;X;X;X	XXXXXXXXPPPPPPPPPPPPPXXXXXXXXXX	EYDRLY(1)EEYTR	EY(-58.91)DRLY(58.91)EEY(-60.06)T(-83.51)R	yes
0	0.39287	0.075954	0.766744	0.224637	Y	4	0.889854	0.000128803	90.706	80.565	Q6IQ23-3;Q6IQ23;Q6IQ23-2	462;888;888	Q6IQ23-3	Q6IQ23-3	Pleckstrin homology domain-containing family A member 7	PLEKHA7	VRTPLEVRLFPQLQTYVPYRPHPPQLRKVTS	9.47993	X;X;X;X;X;X;X;X;X;X;X;X;X;X;X;Phospho (STY);X;X;X;X;X;X;X;X;X;X;X;X;X;X;X	XXXXXXXXPPPPPPPPPPPPPPPPPPPXXXX	LFPQLQT(0.1)Y(0.89)VPY(0.01)RPHPPQLR	LFPQLQT(-9.48)Y(9.48)VPY(-19.56)RPHPPQLR	yes
0	0.127307	1.33735	-0.610061	4.37155	Y	3	1	0.00072091	118.18	89.543	Q494U1-3;Q494U1-2;Q494U1	99;99;99	Q494U1-3	Q494U1-3	Pleckstrin homology domain-containing family N member 1	PLEKHN1	GRRRVPVRNLGKVVHYAKVQLRFQHSQDVSD	118.181	X;X;X;X;X;X;X;X;X;X;X;X;X;X;X;Phospho (STY);X;X;X;X;X;X;X;X;X;X;X;X;X;X;X	XXXXXXXXXXXXPPPPPPXXXXXXXXXXXXX	VVHY(1)AK	VVHY(118.18)AK	yes
0	0.0766558	0.328218	-0.184314	1.83115	Y	2	1	0.00415171	89.142	33.638	P51153	5	P51153	P51153	Ras-related protein Rab-13	RAB13	___________MAKAYDHLFKLLLIGDSGVG	89.1423	X;X;X;X;X;X;X;X;X;X;X;X;X;X;X;Phospho (STY);X;X;X;X;X;X;X;X;X;X;X;X;X;X;X	XXXXXXXXXXXXXXPPPPPPPXXXXXXXXXX	AY(1)DHLFK	AY(89.14)DHLFK	yes
0	0.226985	0.108552	0.321653	1.0568	Y	3	0.790395	0.00476628	71.879	63.082	P63173	43	P63173	P63173	60S ribosomal protein L38	RPL38	NKDNVKFKVRCSRYLYTLVITDKEKAEKLKQ	5.87434	X;X;X;X;X;X;X;X;X;X;X;X;X;X;X;Phospho (STY);X;X;X;X;X;X;X;X;X;X;X;X;X;X;X	XXXXXXXXXXXXXPPPPPPPPPPPPXXXXXX	Y(0.005)LY(0.79)T(0.204)LVITDKEK	Y(-21.79)LY(5.87)T(-5.87)LVIT(-52.2)DKEK	yes
0	0.368009	0.304885	0.609192	1.88254	Y	3	0.97963	0.000625755	86.8	65.74	P62851	65	P62851	P62851	40S ribosomal protein S25	RPS25	FDKATYDKLCKEVPNYKLITPAVVSERLKIR	16.8207	X;X;X;X;X;X;X;X;X;X;X;X;X;X;X;Phospho (STY);X;X;X;X;X;X;X;X;X;X;X;X;X;X;X	XXXXXXXXXXXPPPPPPPPPPPPPPPPXXXX	EVPNY(0.98)KLIT(0.02)PAVVSER	EVPNY(16.82)KLIT(-16.82)PAVVS(-63.57)ER	yes
0	0.355253	-0.297621	0.659266	-0.322831	Y	3	0.975035	0.0259067	45.829	23.251	Q15424-2;Q15424;Q15424-4;Q15424-3	688;757;756;757	Q15424-2	Q15424-2	Scaffold attachment factor B1	SAFB	RQDRFHDFDHRDRGRYPDHSVDRREGSRSMM	15.9168	X;X;X;X;X;X;X;X;X;X;X;X;X;X;X;Phospho (STY);X;X;X;X;X;X;X;X;X;X;X;X;X;X;X	XXXXXXXXXXXXXPPPPPPPPPPPXXXXXXX	GRY(0.975)PDHS(0.025)VDRR	GRY(15.92)PDHS(-15.92)VDRR	yes
0	0.277606	0.587889	-0.23915	-0.245758	Y	3	1	0.00835438	66.692	33.429	Q15424-2;Q15424;Q15424-4;Q15424-3;Q14151	645;714;713;714;732	Q15424-2	Q15424-2	Scaffold attachment factor B1;Scaffold attachment factor B2	SAFB;SAFB2	ELRYEQERRPAVRRPYDLDRRDDAYWPEAKR	66.6919	X;X;X;X;X;X;X;X;X;X;X;X;X;X;X;Phospho (STY);X;X;X;X;X;X;X;X;X;X;X;X;X;X;X	XXXXXXXXXXXXXPPPPPPPPXXXXXXXXXX	RPY(1)DLDRR	RPY(66.69)DLDRR	yes
0	0.776823	0.7063	0.891328	2.0006	Y	2	1	1.19e-07	136.57	121.89	Q9Y3B4	86	Q9Y3B4	Q9Y3B4	Pre-mRNA branch site protein p14	SF3B14	KNACDHLSGFNVCNRYLVVLYYNANRAFQKM	88.6562	X;X;X;X;X;X;X;X;X;X;X;X;X;X;X;Phospho (STY);X;X;X;X;X;X;X;X;X;X;X;X;X;X;X	XXXXXXXXXXXXXXXPPPPPPPPPPPXXXXX	Y(1)LVVLYYNANR	Y(88.66)LVVLY(-88.66)Y(-98.99)NANR	yes
0	0.309322	0.45677	0.746475	1.56827	Y	2	0.999986	3.73e-05	127.76	96.343	Q9H1N7-2;Q9H1N7-3;Q9H1N7	43;43;43	Q9H1N7-2	Q9H1N7-2	Adenosine 3'-phospho 5'-phosphosulfate transporter 2	SLC35B3	CSKITMDLKFNNSRKYISITVPSKTQTMSPH	48.6167	X;X;X;X;X;X;X;X;X;X;X;X;X;X;X;Phospho (STY);X;X;X;X;X;X;X;X;X;X;X;X;X;X;X	XXXXXXXXXXXXXXXPPPPPPPPPXXXXXXX	Y(1)ISITVPSK	Y(48.62)IS(-48.62)IT(-81.3)VPS(-124.83)K	yes
0	0.0746559	0.161023	0.304729	1.96638	Y	3	1	7.27e-05	102.53	83.399	Q9Y6M7-11;Q9Y6M7-14;Q9Y6M7-2;Q9Y6M7-9;Q9Y6M7-6;Q9Y6M7-13;Q9Y6M7;Q9Y6M7-7;Q9Y6M7-10;Q9Y6M7-12;Q9Y6M7-8	49;53;44;49;49;53;44;53;49;49;53	Q9Y6M7-11	Q9Y6M7-11	Sodium bicarbonate cotransporter 3	SLC4A7	NTKFEKEELESHRAVYIGVHVPFSKESRRRH	76.7999	X;X;X;X;X;X;X;X;X;X;X;X;X;X;X;Phospho (STY);X;X;X;X;X;X;X;X;X;X;X;X;X;X;X	XXXXXXXXXXXXXPPPPPPPPPPPPXXXXXX	AVY(1)IGVHVPFSK	AVY(76.8)IGVHVPFS(-76.8)K	yes
0	-0.0638614	-0.13585	0.102496	1.13755	Y	3	1	0.0300019	43.083	32.325	Q7Z7L1	226	Q7Z7L1	Q7Z7L1	Schlafen family member 11	SLFN11	QLVEFKQFSTKHFQEYVKRTIPEYVPAFANT	43.0829	X;X;X;X;X;X;X;X;X;X;X;X;X;X;X;Phospho (STY);X;X;X;X;X;X;X;X;X;X;X;X;X;X;X	XXXXXXXXXXXPPPPPPPPXXXXXXXXXXXX	HFQEY(1)VKR	HFQEY(43.08)VKR	yes
0	0.551991	0.180228	0.245553	1.95715	Y	3	1	1.14e-15	208.11	170.77	Q07955	189	Q07955	Q07955	Serine/arginine-rich splicing factor 1	SRSF1	KLDNTKFRSHEGETAYIRVKVDGPRSPSYGR	73.0112	X;X;X;X;X;X;X;X;X;X;X;X;X;X;X;Phospho (STY);X;X;X;X;X;X;X;X;X;Phospho (STY);X;X;X;X;X	XXXXXXXXPPPPPPPPPPXXXXXXXXXXXXX	SHEGETAY(1)IR	S(-165.68)HEGET(-73.01)AY(73.01)IR	yes
0	-0.177498	0.101143	0.075557	0.914615	Y	3	1	9.78e-06	115.33	77.358	P42229-2;P51692;P42229	664;699;694	P42229-2	P42229-2	Signal transducer and activator of transcription 5A;Signal transducer and activator of transcription 5B	STAT5A;STAT5B	FSKYYTPVLAKAVDGYVKPQIKQVVPEFVNA	115.327	X;X;X;X;X;X;X;X;X;X;X;X;X;X;X;Phospho (STY);X;X;X;X;X;X;X;X;X;X;X;X;X;X;X	XXXXXXXXXXXPPPPPPPPPPPXXXXXXXXX	AVDGY(1)VKPQIK	AVDGY(115.33)VKPQIK	yes
0	0.202992	0.310769	0.573617	1.80637	Y	3	1	0.0115228	64.244	52.535	O60506-5;O60506-4;O60506-3;O60506-2;O60506	221;338;373;338;373	O60506-5	O60506-5	Heterogeneous nuclear ribonucleoprotein Q	SYNCRIP	FSQFGKLERVKKLKDYAFIHFDERDGAVKAM	64.2439	X;X;X;X;X;X;X;X;X;X;X;X;X;X;X;Phospho (STY);X;X;X;X;X;X;X;X;X;X;X;X;X;X;X	XXXXXXXXXXXXPPPPPPPPPPPPXXXXXXX	LKDY(1)AFIHFDER	LKDY(64.24)AFIHFDER	yes
0	0.067759	0.139682	0.407213	2.14443	Y	2	0.999999	0.00682125	89.369	47.94	Q96C24	396	Q96C24	Q96C24	Synaptotagmin-like protein 4	SYTL4	HQLAYADEAKKRSNPYVKTYLLPDKSRQGKR	59.5624	X;X;X;X;X;X;X;X;X;X;X;X;X;X;X;Phospho (STY);X;X;X;X;X;X;X;X;X;X;X;X;X;X;X	XXXXXXXXXXXXPPPPPPXXXXXXXXXXXXX	SNPY(1)VK	S(-59.56)NPY(59.56)VK	yes
0	0.693365	0.682277	0.179742	-0.0249215	Y	2	1	0.000761431	88.101	65.03	Q92804-2;Q92804	415;418	Q92804-2	Q92804-2	TATA-binding protein-associated factor 2N	TAF15	RGYRGRGGRGGDRGGYGGDRSGGGYGGDRSS	72.5312	X;X;X;X;X;X;X;X;X;X;X;X;X;X;X;Phospho (STY);X;X;X;X;X;X;X;X;X;X;X;X;X;X;X	XXXXXXXXXPPPPPPPPPPPXXXXXXXXXXX	GGDRGGY(1)GGDR	GGDRGGY(72.53)GGDR	yes
0	-0.228609	0.125559	0.120373	0.886203	Y	3	0.999989	0.00129059	83.948	47.523	P42680	343	P42680	P42680	Tyrosine-protein kinase Tec	TEC	EYHKHNAAGLVTRLRYPVSVKGKNAPTTAGF	49.695	X;X;X;X;X;X;X;X;X;X;X;X;X;X;X;Phospho (STY);X;X;X;X;X;X;X;X;X;X;X;X;X;X;X	XXXXXXXXXXXXXPPPPPPPPXXXXXXXXXX	LRY(1)PVSVK	LRY(49.69)PVS(-49.69)VK	yes
0	-0.0775332	0.126075	0.210006	0.710203	Y	4	1	6.37e-20	199.28	190.93	P68366-2;P68366;P68363;P68363-2;Q71U36-2;Q13748-2;Q9BQE3;Q13748;Q71U36;Q9NY65-2;Q9NY65	88;103;103;103;68;103;103;103;103;37;103	P68366-2	P68366-2	Tubulin alpha-4A chain;Tubulin alpha-1B chain;Tubulin alpha-1A chain;Tubulin alpha-3C/D chain;Tubulin alpha-1C chain;Tubulin alpha-8 chain	TUBA4A;TUBA1B;TUBA1A;TUBA3C;TUBA1C;TUBA8	HPEQLITGKEDAANNYARGHYTIGKEIIDPV	77.8429	X;X;X;X;X;X;X;X;X;X;X;X;X;X;X;Phospho (STY);X;X;X;X;X;X;X;X;X;X;X;X;X;X;X	PPPPPPPPPPPPPPPPPPXXXXXXXXXXXXX	QLFHPEQLITGKEDAANNY(1)AR	QLFHPEQLIT(-77.84)GKEDAANNY(77.84)AR	yes
0	0.618865	-0.280105	0.400854	0.04535	Y	2	0.999689	5.52e-32	246.86	210.44	P08670	53	P08670	P08670	Vimentin	VIM	YSLGSALRPSTSRSLYASSPGGVYATRSSAV	35.0841	Phospho (STY);Phospho (STY);X;X;X;X;X;X;X;X;X;X;X;X;X;Phospho (STY);X;X;X;X;X;X;X;X;X;X;X;X;X;X;X	XXXXXXXXXXXXXPPPPPPPPPPPPPPXXXX	SLY(1)ASSPGGVYATR	S(-62.09)LY(35.08)AS(-35.08)S(-62.75)PGGVY(-154.71)AT(-184.99)R	yes
0	-0.0265402	0.0818232	0.146738	0.742682	Y	3	1	1.45e-09	170.47	127.16	P08670	117	P08670	P08670	Vimentin	VIM	NEKVELQELNDRFANYIDKVRFLEQQNKILL	170.471	X;X;X;X;X;X;X;X;X;X;X;X;X;X;X;Phospho (STY);X;X;X;X;X;X;X;X;X;X;X;X;X;X;X	XXXXXXXXXXXXPPPPPPPPPXXXXXXXXXX	FANY(1)IDKVR	FANY(170.47)IDKVR	yes
0	0.778616	0.459071	0.172756	0.0872865	Y	3	1	0.000272067	104.2	85.513	P08670	319	P08670	P08670	Vimentin	VIM	RNNDALRQAKQESTEYRRQVQSLTCEVDALK	65.4218	X;X;X;X;X;X;X;X;X;X;X;X;X;X;X;Phospho (STY);X;X;X;X;X;X;X;X;X;X;X;X;X;X;X	XXXXXXXXXXPPPPPPPPXXXXXXXXXXXXX	QESTEY(1)RR	QES(-74.66)T(-65.42)EY(65.42)RR	yes
0	-0.0852054	0.636632	-0.243077	-0.281609	Y	3	0.994133	2.76e-16	210.15	159.36	O43709;O43709-3	272;289	O43709	O43709	Uncharacterized methyltransferase WBSCR22	WBSCR22	ERHRRQGREVRPDTQYTGRKRKPRF______	22.2941	X;X;X;X;X;X;X;X;X;X;X;X;X;X;X;Phospho (STY);X;X;X;X;X;X;X;X;X;X;X;X;X;X;X	XXXXXXXXPPPPPPPPPPPXXXXXXXXXXXX	EVRPDTQY(0.994)T(0.006)GR	EVRPDT(-52.47)QY(22.29)T(-22.29)GR	yes
0	-0.216942	0.172857	-0.0465826	2.33634	Y	3	0.771425	0.0230052	48.561	28.639	Q9ULJ8-2;Q9ULJ8-4;Q9ULJ8-5;Q9ULJ8-3	189;1116;1098;1138	Q9ULJ8-2	Q9ULJ8-2			PCMPFSWFNDSRKGSYSFRNLPAPTSSLQPS	8.29294	X;X;X;X;X;X;X;X;X;X;X;X;X;X;X;Phospho (STY);X;X;X;X;X;X;X;X;X;X;X;X;X;X;X	XXXXXXXXXXXXPPPPPPPXXXXXXXXXXXX	KGS(0.114)Y(0.771)S(0.114)FR	KGS(-8.29)Y(8.29)S(-8.29)FR	yes
0	-0.0447288	-0.000583649	0.109714	NaN	Y	3	0.998921	0.000934096	76.728	65.02	Q96MU7-2;Q96MU7	522;540	Q96MU7-2	Q96MU7-2	YTH domain-containing protein 1	YTHDC1	RREPVRDVGRRRPEDYDIHNSRKKPRIDYPP	29.6663	X;X;X;X;X;X;X;X;X;X;X;X;X;X;X;Phospho (STY);X;X;X;X;X;X;X;X;X;X;X;X;X;X;X	XXXXXXXXXXPPPPPPPPPPPPXXXXXXXXX	RRPEDY(0.999)DIHNS(0.001)R	RRPEDY(29.67)DIHNS(-29.67)R
0	-0.225573	-0.327317	-0.299443	NaN	Y	2	0.999999	0.0027192	81.296	72.056	P16104	143	P16104	P16104	Histone H2A.x	H2AFX	KAPSGGKKATQASQEY_______________	61.6377	X;X;X;X;X;X;X;X;X;X;X;X;X;X;X;Phospho (STY);X;X;X;X;X;X;X;X;X;X;X;X;X;X;X	XXXXXXXXPPPPPPPPXXXXXXXXXXXXXXX	ATQASQEY(1)	AT(-76.4)QAS(-61.64)QEY(61.64)
0	0.290359	-0.159118	0.019552	0.577323	Y	3	0.999246	1.87e-08	142.85	118.43	Q86YQ8-2;Q86YQ8	79;410	Q86YQ8-2	Q86YQ8-2	Copine-8	CPNE8	GVMEAYYRSLKSVQLYGPTNFAPVINHVARY	32.7481	X;X;X;X;X;X;X;X;X;X;X;X;X;X;X;Phospho (STY);X;X;X;X;X;X;X;X;X;X;X;X;X;X;X	XXXXXXXXXXXPPPPPPPPPPPPPPPPPPPX	S(0.001)VQLY(0.999)GPTNFAPVINHVAR	S(-32.75)VQLY(32.75)GPT(-36.51)NFAPVINHVAR
0	0.253576	-0.19391	-0.0761247	0.575462	Y	3	1	0.00133558	81.972	62.335	P67809	138	P67809	P67809	Nuclease-sensitive element-binding protein 1	YBX1	ANVTGPGGVPVQGSKYAADRNHYRRYPRRRG	67.8534	X;X;X;X;X;X;X;X;X;X;X;X;X;X;X;Phospho (STY);X;X;X;X;X;X;X;X;X;X;X;X;X;X;X	XXXXXXXXXXXXXXXPPPPPPPPPXXXXXXX	Y(1)AADRNHYR	Y(67.85)AADRNHY(-67.85)R
0	0.0472948	0.0409615	0.229214	0.558798	Y	2	0.99767	0.0212185	69.383	24.41	Q15843;Q15011-3;Q15011-4;Q15011-2;Q15011	45;58;58;58;58	Q15843	Q15843	NEDD8;Homocysteine-responsive endoplasmic reticulum-resident ubiquitin-like domain member 1 protein	NEDD8;HERPUD1	VEEKEGIPPQQQRLIYSGKQMNDEKTAADYK	26.3172	X;X;X;X;X;X;X;X;X;X;X;X;X;X;X;Phospho (STY);X;X;X;X;X;X;X;X;X;X;X;X;X;X;X	XXXXXXXXXXXXXPPPPPPXXXXXXXXXXXX	LIY(0.998)S(0.002)GK	LIY(26.32)S(-26.32)GK
0	0.220836	0.154599	-0.227529	0.557876	Y	2	1	0.000215933	107.95	91.412	Q9C0C4	789	Q9C0C4	Q9C0C4	Semaphorin-4C	SEMA4C	TRLHLGGGRNSNANGYVRLQLGGEDRGGLGH	80.1801	X;X;X;X;X;X;X;X;X;X;X;X;X;X;X;Phospho (STY);X;X;X;X;X;X;X;X;X;X;X;X;X;X;X	XXXXXXXXXPPPPPPPPPXXXXXXXXXXXXX	NSNANGY(1)VR	NS(-80.18)NANGY(80.18)VR
0	-0.0172836	-0.0834649	0	0.536592	Y	3	0.990272	1.63e-06	102.65	96.145	O95071-2;O95071	1746;1746	O95071-2	O95071-2	E3 ubiquitin-protein ligase UBR5	UBR5	PSSTSTPAASSAGLIYIDPSNLRRSGTISTS	21.9681	X;X;X;X;X;X;X;X;X;X;X;X;X;X;X;Phospho (STY);X;X;X;X;X;X;X;X;X;X;X;X;X;X;X	PPPPPPPPPPPPPPPPPPPPPPPXXXXXXXX	AASTAPSSTSTPAAS(0.002)S(0.006)AGLIY(0.99)IDPS(0.001)NLR	AAS(-60.8)T(-61.29)APS(-56.8)S(-52.11)T(-47.24)S(-52.11)T(-52.11)PAAS(-26.41)S(-21.97)AGLIY(21.97)IDPS(-29.44)NLR
0	0.142978	0.159855	0.0212508	0.536388	Y	3	0.999983	0.00491051	72.325	45.536	P48444-2;P48444	222;310	P48444-2	P48444-2	Coatomer subunit delta	ARCN1	MELHGMIMLRISDDKYGRIRLHVENEDKKGV	47.8155	X;X;X;X;X;X;X;X;X;X;X;X;X;X;X;Phospho (STY);X;X;X;X;X;X;X;X;X;X;X;X;X;X;X	XXXXXXXXXXPPPPPPPPXXXXXXXXXXXXX	ISDDKY(1)GR	IS(-47.82)DDKY(47.82)GR		yes
0	-0.0874962	0.204639	0.318215	0.524555	Y	3	0.999998	1.05e-07	132.79	113.33	P27986-5;P27986-3;P27986-2;P27986;P27986-4	104;167;197;467;467	P27986-5	P27986-5	Phosphatidylinositol 3-kinase regulatory subunit alpha	PIK3R1	YNTQFQEKSREYDRLYEEYTRTSQEIQMKRT	58.9091	X;X;X;X;X;X;X;X;X;X;X;X;X;X;X;Phospho (STY);X;X;X;X;X;X;X;X;X;X;X;X;X;X;X	XXXXXXXXPPPPPPPPPPPPPXXXXXXXXXX	EYDRLY(1)EEYTR	EY(-58.91)DRLY(58.91)EEY(-60.06)T(-83.51)R		yes
0	0.17004	-0.186071	0.546198	0.515117	Y	2	0.992777	0.00307664	77.058	64.627	O60245	1064	O60245	O60245	Protocadherin-7	PCDH7	CQTNNKYSKQMRLHPYITVFG__________	21.3816	X;X;X;X;X;X;X;X;X;X;X;X;X;X;X;Phospho (STY);X;X;X;X;X;X;X;X;X;X;X;X;X;X;X	XXXXXXXXXXXXPPPPPPPPPXXXXXXXXXX	LHPY(0.993)IT(0.007)VFG	LHPY(21.38)IT(-21.38)VFG
0	0.147303	0.491466	0.25838	0.508828	Y	3	0.95002	0.00161499	76.943	54.365	P46776	108	P46776	P46776	60S ribosomal protein L27a	RPL27A	NKTGAAPIIDVVRSGYYKVLGKGKLPKQPVI	15.1636	X;X;X;X;X;X;X;X;X;X;X;X;X;X;X;Phospho (STY);X;X;X;X;X;X;X;X;X;X;X;X;X;X;X	XXXXXXXXXXXXXPPPPPPPPPXXXXXXXXX	S(0.029)GY(0.95)Y(0.021)KVLGK	S(-15.16)GY(15.16)Y(-16.55)KVLGK		yes
0	-0.0198105	-0.060743	0.0604287	0.506208	Y	3	1	0.000108178	114.51	87.21	Q6WCQ1-3;Q6WCQ1;Q6WCQ1-2;Q9H2D6-6;Q9H2D6-5;Q9H2D6-7;Q9H2D6-3;Q9H2D6-2;Q9H2D6	412;450;450;141;82;141;1682;1756;1854	Q6WCQ1-3	Q6WCQ1-3	Myosin phosphatase Rho-interacting protein;TRIO and F-actin-binding protein	MPRIP;TRIOBP	LSACYDVTEYPVQRNYGFQIHTKEGEFTLSA	86.9595	X;X;X;X;X;X;X;X;X;X;X;X;X;X;X;Phospho (STY);X;X;X;X;X;X;X;X;X;X;X;X;X;X;X	XXXXXXXXXXXXXXPPPPPPPPPXXXXXXXX	NY(1)GFQIHTK	NY(86.96)GFQIHT(-86.96)K
0	-0.223556	0.035195	-0.142391	0.500482	Y	2	1	0.000721374	117.16	35.376	P07948;P07948-2	306;285	P07948	P07948	Tyrosine-protein kinase Lyn	LYN	ANLMKTLQHDKLVRLYAVVTREEPIYIITEY	75.0854	X;X;X;X;X;X;X;X;X;X;X;X;X;X;X;Phospho (STY);X;X;X;X;X;X;X;X;X;X;X;X;X;X;X	XXXXXXXXXXXXXXPPPPPPPXXXXXXXXXX	LY(1)AVVTR	LY(75.09)AVVT(-75.09)R		yes
0	0.226029	0.274206	0.199376	0.49033	Y	3	0.999308	3.9e-13	169.64	157.01	P17302	313	P17302	P17302	Gap junction alpha-1 protein	GJA1	CRNYNKQASEQNWANYSAEQNRMGQAGSTIS	31.5941	X;X;X;X;X;X;X;X;X;X;X;X;X;X;X;Phospho (STY);X;X;X;X;X;X;X;X;X;X;X;X;X;X;X	XXXXXXPPPPPPPPPPPPPPPPXXXXXXXXX	QASEQNWANY(0.999)S(0.001)AEQNR	QAS(-129.29)EQNWANY(31.59)S(-31.59)AEQNR		yes
0	-0.217653	0.17601	0.227932	0.487513	Y	3	0.768424	0.000877317	89.507	72.582	P14923	550	P14923	P14923	Junction plakoglobin	JUP	HQDAQRHVAAGTQQPYTDGVRMEEIVEGCTG	5.20952	X;X;X;X;X;X;X;X;X;X;X;X;X;X;X;Phospho (STY);X;X;X;X;X;X;X;X;X;X;X;X;X;X;X	XXXXXXPPPPPPPPPPPPPPPXXXXXXXXXX	HVAAGTQQPY(0.768)T(0.232)DGVR	HVAAGT(-45.12)QQPY(5.21)T(-5.21)DGVR		yes
0	-0.0445757	-0.0785356	-0.0847931	0.48398	Y	3	1	0.000647572	96.948	50.577	P35579-2;P35579;P35580;P35580-5;P35580-2;P35580-3;P35580-4;Q7Z406-5;Q7Z406-4;Q7Z406;Q7Z406-6;Q7Z406-2	264;400;407;416;423;407;417;426;426;426;434;434	P35579-2	P35579-2	Myosin-9;Myosin-10;Myosin-14	MYH9;MYH10;MYH14	FTRGILTPRIKVGRDYVQKAQTKEQADFAIE	96.9477	X;X;X;X;X;X;X;X;X;X;X;X;X;X;X;Phospho (STY);X;X;X;X;X;X;X;X;X;X;X;X;X;X;X	XXXXXXXXXXXPPPPPPPPXXXXXXXXXXXX	VGRDY(1)VQK	VGRDY(96.95)VQK
0	0.128014	0.220304	0.0705805	0.479582	Y	2	1	8.43e-08	148.28	118.11	Q9Y520-2;Q9Y520-3;Q9Y520-6;Q9Y520-4;Q9Y520-5;Q9Y520;Q9Y520-7	975;1218;1218;1218;1218;1218;1220	Q9Y520-2	Q9Y520-2	Protein PRRC2C	PRRC2C	SYGGRGRGGRGHTRDYPQYRDNKPRAEHIPS	86.4215	X;Phospho (STY);X;X;X;X;X;X;X;X;X;X;X;X;X;Phospho (STY);X;X;X;X;X;X;X;X;X;X;X;X;X;X;X	XXXXXXXXXXPPPPPPPPPPPPPPPXXXXXX	DY(1)PQYR	DY(86.42)PQY(-86.42)R
0	0.194816	0.132308	0.326686	0.475837	Y	3	1	1.88e-05	106.58	89.032	A8MVW0	546	A8MVW0	A8MVW0	Protein FAM171A2	FAM171A2	NVYRNVMPTLVIPAHYVRLGGEAGAAGVGDE	89.4927	X;X;X;X;X;X;Oxidation (M);X;X;X;X;X;X;X;X;Phospho (STY);X;X;X;X;X;X;X;X;X;X;X;X;X;X;X	XXXXPPPPPPPPPPPPPPXXXXXXXXXXXXX	NVMPTLVIPAHY(1)VR	NVMPT(-89.49)LVIPAHY(89.49)VR
0	-0.0420796	-0.153599	-0.17887	0.47299	Y	2	0.999398	0.0023416	98.629	66.694	P62851	109	P62851	P62851	40S ribosomal protein S25	RPS25	KGLIKLVSKHRAQVIYTRNTKGGDAPAAGED	32.2001	X;X;X;X;X;X;X;X;X;X;X;X;X;X;X;Phospho (STY);X;X;X;X;X;X;X;X;X;X;X;X;X;X;X	XXXXXXXXXXXPPPPPPPXXXXXXXXXXXXX	AQVIY(0.999)T(0.001)R	AQVIY(32.2)T(-32.2)R
0	0.138591	0.00864303	0.0695643	0.467462	Y	4	0.786695	5.45e-14	176.69	169.27	P0DMV8-2;P0DMV9;P0DMV8	15;15;15	P0DMV8-2	P0DMV8-2			_MAKAAAIGIDLGTTYSCVGVFQHGKVEIIA	6.07768	X;X;X;X;X;X;X;X;X;X;X;X;X;X;X;Phospho (STY);X;X;X;X;X;X;X;X;X;X;X;X;X;X;X	XXXXPPPPPPPPPPPPPPPPPPPPPPXXXXX	AAAIGIDLGTT(0.194)Y(0.787)S(0.019)CVGVFQHGK	AAAIGIDLGT(-41.6)T(-6.08)Y(6.08)S(-16.14)CVGVFQHGK
0	0.263749	0.0392542	-0.279266	0.457597	Y	3	0.833101	0.00297424	73.138	65.265	Q9C0B0	236	Q9C0B0	Q9C0B0	RING finger protein unkempt homolog	UNK	CKKPPRLCRQGYACPYYHNSKDRRRSPRKHK	6.98585	X;X;X;X;X;X;X;X;X;X;X;X;X;X;X;Phospho (STY);X;X;X;Phospho (STY);X;X;X;X;X;X;X;X;X;X;X	XXXXXXXXXPPPPPPPPPPPPPPXXXXXXXX	QGYACPY(0.833)Y(0.167)HNS(1)KDR	QGY(-38)ACPY(6.99)Y(-6.99)HNS(51.47)KDR
0	0.046116	-0.0443256	0.306038	0.455835	Y	3	0.999938	1.06e-61	318.69	284.85	Q13523	849	Q13523	Q13523	Serine/threonine-protein kinase PRP4 homolog	PRPF4B	DFGSASHVADNDITPYLVSRFYRAPEIIIGK	44.1499	X;X;X;X;X;X;X;X;X;X;X;X;X;X;X;Phospho (STY);X;X;X;X;X;X;X;X;X;X;X;X;X;X;X	PPPPPPPPPPPPPPPPPPPPXXXXXXXXXXX	LCDFGSASHVADNDITPY(1)LVSR	LCDFGS(-192.36)AS(-167.64)HVADNDIT(-44.15)PY(44.15)LVS(-46.23)R
0	-0.484148	-0.091496	-0.144952	0.443248	Y	2	0.988903	0.00181711	108.24	8.3185	Q04206-2;Q04206-3;Q04206-4;Q04206	293;296;303;306	Q04206-2	Q04206-2	Transcription factor p65	RELA	DTDDRHRIEEKRKRTYETFKSIMKKSPFSGP	19.5036	X;X;X;X;X;X;X;X;X;X;X;X;X;X;X;Phospho (STY);X;X;X;X;X;X;X;X;X;X;X;X;X;X;X	XXXXXXXXXXXXXXPPPPPPXXXXXXXXXXX	T(0.011)Y(0.989)ETFK	T(-19.5)Y(19.5)ET(-49.58)FK
0	-0.0577947	0.234824	0.538664	0.439837	Y	3	0.990598	6.44e-06	120.4	104.89	A6NI28	792	A6NI28	A6NI28	Rho GTPase-activating protein 42	ARHGAP42	KMCRRLRLDTASSNGYQRPGSVVAAKAQLFE	20.3775	X;X;X;X;X;X;X;X;X;X;X;X;X;X;X;Phospho (STY);X;X;X;X;X;X;X;X;X;X;X;X;X;X;X	XXXXXXXPPPPPPPPPPPPPPPPPPPXXXXX	LDTASS(0.009)NGY(0.991)QRPGSVVAAK	LDT(-62.38)AS(-36.15)S(-20.38)NGY(20.38)QRPGS(-40.91)VVAAK
0	0.0884899	0.076823	-0.00986278	0.439425	Y	3	0.967356	0.0384713	41.689	19.111	Q9UQ80-2;Q9UQ80	201;255	Q9UQ80-2	Q9UQ80-2	Proliferation-associated protein 2G4	PA2G4	AGQRTTIYKRDPSKQYGLKMKTSRAFFSEVE	14.7179	X;X;X;X;X;X;X;X;X;X;X;X;X;X;X;Phospho (STY);X;X;X;X;X;X;X;X;X;X;X;X;X;X;X	XXXXXXXXXXPPPPPPPPPXXXXXXXXXXXX	DPS(0.033)KQY(0.967)GLK	DPS(-14.72)KQY(14.72)GLK
0	-0.176837	0.313515	0.141465	0.430623	Y	2	0.999988	0.000942747	78.098	52.29	P42356	1154	P42356	P42356	Phosphatidylinositol 4-kinase alpha	PI4KA	FMASLNLRNRYAGEVYGMIRFSGTTGQMSDL	49.3004	X;X;X;X;X;X;X;X;X;X;X;X;X;X;X;Phospho (STY);X;Oxidation (M);X;X;X;X;X;X;X;X;X;X;X;X;X	XXXXXXXXPPPPPPPPPPPPXXXXXXXXXXX	YAGEVY(1)GMIR	Y(-49.3)AGEVY(49.3)GMIR		yes
0	-0.152523	-0.0242109	0.0755436	0.422809	Y	3	0.98111	0.0191627	60.549	39.761	O43252	30	O43252	O43252	Bifunctional 3'-phosphoadenosine 5'-phosphosulfate synthase 1;Sulfate adenylyltransferase;Adenylyl-sulfate kinase	PAPSS1	NNAQNWGMQRATNVTYQAHHVSRNKRGQVVG	17.5911	X;X;X;X;X;X;X;X;X;X;X;X;X;X;X;Phospho (STY);X;X;X;X;X;X;X;X;X;X;X;X;X;X;X	XXXXXXXXXXPPPPPPPPPPPPPXXXXXXXX	AT(0.002)NVT(0.017)Y(0.981)QAHHVSR	AT(-27.4)NVT(-17.59)Y(17.59)QAHHVS(-46.8)R
0	0.256953	0.266579	-0.986613	0.413266	Y	3	1	2.7e-05	127.56	109.13	P09622-2;P09622	54;153	P09622-2	P09622-2	Dihydrolipoyl dehydrogenase, mitochondrial	DLD	IAHLFKQNKVVHVNGYGKITGKNQVTATKAD	127.565	X;X;X;X;X;X;X;X;X;X;X;X;X;X;X;Phospho (STY);X;X;X;X;X;X;X;X;X;X;X;X;X;X;X	XXXXXXXXXPPPPPPPPPXXXXXXXXXXXXX	VVHVNGY(1)GK	VVHVNGY(127.56)GK
0	0.238105	0.160802	0.172774	0.409863	Y	3	1	0.032236	44.543	24.884	Q03135	25	Q03135	Q03135	Caveolin-1	CAV1	EGHLYTVPIREQGNIYKPNNKAMADELSEKQ	44.5427	X;X;X;X;X;X;X;X;X;X;X;X;X;X;X;Phospho (STY);X;X;X;X;X;X;X;X;X;X;X;X;X;X;X	XXXXXXXXXXPPPPPPPPPPPXXXXXXXXXX	EQGNIY(1)KPNNK	EQGNIY(44.54)KPNNK		yes
0	0.100667	0.011002	0.195799	0.404494	Y	3	1	0.0154075	61.679	10.976	Q9NUQ6-2;Q9NUQ6;Q9NUQ6-4;Q9NUQ6-3	15;15;23;45	Q9NUQ6-2	Q9NUQ6-2	SPATS2-like protein	SPATS2L	_MAELNTHVNVKEKIYAVRSVVPNKSNNEIV	61.6789	X;X;X;X;X;X;X;X;X;X;X;X;X;X;X;Phospho (STY);X;X;X;X;X;X;X;X;X;X;X;X;X;X;X	XXXXXXXXXXXXPPPPPPPXXXXXXXXXXXX	EKIY(1)AVR	EKIY(61.68)AVR
0	0.245718	0.149957	0.282427	0.396753	Y	3	1	2.6e-05	113.25	105.25	Q01484-5;Q01484-2;Q01484	717;738;738	Q01484-5	Q01484-5	Ankyrin-2	ANK2	AHTKLGYTPLIVACHYGNVKMVNFLLKQGAN	90.8878	X;X;X;X;X;X;X;X;X;X;X;X;X;X;X;Phospho (STY);X;X;X;X;X;X;X;X;X;X;X;X;X;X;X	XXXXPPPPPPPPPPPPPPPPXXXXXXXXXXX	LGYTPLIVACHY(1)GNVK	LGY(-96.51)T(-90.89)PLIVACHY(90.89)GNVK
0	-0.0248044	-0.146692	-0.0637474	0.395077	Y	3	0.91361	0.012886	64.776	31.038	Q13123	81	Q13123	Q13123	Protein Red	IK	EDEDPAARRRKKKSYYAKLRQQEIERERELA	10.2512	X;X;X;X;X;X;X;X;X;X;X;X;X;X;X;Phospho (STY);X;X;X;X;X;X;X;X;X;X;X;X;X;X;X	XXXXXXXXXXXXPPPPPPXXXXXXXXXXXXX	KSY(0.086)Y(0.914)AK	KS(-37.46)Y(-10.25)Y(10.25)AK
0	-0.161676	-0.0267714	-0.151331	0.395014	Y	4	0.999985	0.000581703	81.157	70.803	Q92796-3;Q92796-2;Q92796	222;368;673	Q92796-3	Q92796-3	Disks large homolog 3	DLG3	HTTRPRRDNEVDGQDYHFVVSREQMEKDIQD	48.2985	X;X;X;X;X;X;X;X;X;X;X;X;X;X;X;Phospho (STY);X;X;X;X;X;X;X;X;X;X;X;X;X;X;X	XXXXXXPPPPPPPPPPPPPPPPXXXXXXXXX	RDNEVDGQDY(1)HFVVSR	RDNEVDGQDY(48.3)HFVVS(-48.3)R
0	-0.00575232	-0.0543257	0.0915749	0.391894	Y	2	0.864629	0.00715375	88.35	36.894	Q75N03-2;Q75N03	175;176	Q75N03-2	Q75N03-2	E3 ubiquitin-protein ligase Hakai	CBLL1	GSLFMCSIVQGCKRTYLSQRDLQAHINHRHM	8.0561	X;X;X;X;X;X;X;X;X;X;X;X;X;X;X;Phospho (STY);X;X;X;X;X;X;X;X;X;X;X;X;X;X;X	XXXXXXXXXXXXXXPPPPPPXXXXXXXXXXX	T(0.135)Y(0.865)LSQR	T(-8.06)Y(8.06)LS(-39.59)QR
0	0.0621252	-0.258843	0.156667	0.388003	Y	2	0.994572	5.21e-13	160.63	139.97	O60637-3;O60637-2;O60637	179;218;243	O60637-3	O60637-3	Tetraspanin-3	TSPAN3	LCACIVLCRRSRDPAYELLITGGTYA_____	22.6413	X;X;X;X;X;X;X;X;X;X;X;X;X;X;X;Phospho (STY);X;X;X;X;X;X;X;X;X;X;X;X;X;X;X	XXXXXXXXXPPPPPPPPPPPPPPPPPXXXXX	S(0.005)RDPAY(0.995)ELLITGGTYA	S(-22.64)RDPAY(22.64)ELLIT(-48.6)GGT(-70.19)Y(-96.09)A
0	0.500427	0.126816	0.125416	0.383173	Y	3	0.999269	0.0161597	56.916	32.14	P68366-2;P68366;P68363;Q71U36-2;Q13748-2;Q9BQE3;Q13748;Q71U36	146;161;161;126;161;161;161;161	P68366-2	P68366-2	Tubulin alpha-4A chain;Tubulin alpha-1B chain;Tubulin alpha-1A chain;Tubulin alpha-3C/D chain;Tubulin alpha-1C chain	TUBA4A;TUBA1B;TUBA1A;TUBA3C;TUBA1C	GSGFTSLLMERLSVDYGKKSKLEFSIYPAPQ	31.3567	X;X;X;X;X;X;X;X;X;X;X;X;X;X;X;Phospho (STY);X;X;X;X;X;X;X;X;X;X;X;X;X;X;X	XXXXXXXXXXXPPPPPPPPXXXXXXXXXXXX	LS(0.001)VDY(0.999)GKK	LS(-31.36)VDY(31.36)GKK
0	-0.129093	0.144654	0.304997	0.381019	Y	3	0.999981	3.93e-13	171.76	151.71	O95340;O95340-2	20;20	O95340	O95340	Bifunctional 3'-phosphoadenosine 5'-phosphosulfate synthase 2;Sulfate adenylyltransferase;Adenylyl-sulfate kinase	PAPSS2	KKQKTENQQKSTNVVYQAHHVSRNKRGQVVG	50.3139	X;X;X;X;X;X;X;X;X;X;X;X;X;X;X;Phospho (STY);X;X;X;X;X;X;X;X;X;X;X;X;X;X;X	XXXXXXXXXXPPPPPPPPPPPPPXXXXXXXX	STNVVY(1)QAHHVSR	S(-50.31)T(-50.31)NVVY(50.31)QAHHVS(-131.16)R
0	0.396742	0.0365511	0.432328	0.375964	Y	3	0.999998	5.61e-13	181.66	162.84	P10809	227	P10809	P10809	60 kDa heat shock protein, mitochondrial	HSPD1	EIIEGMKFDRGYISPYFINTSKGQKCEFQDA	58.6536	X;X;X;X;X;X;X;X;X;X;X;X;X;X;X;Phospho (STY);X;X;X;X;X;X;X;X;X;X;X;X;X;X;X	XXXXXXXXXXPPPPPPPPPPPPXXXXXXXXX	GYISPY(1)FINTSK	GY(-60.81)IS(-58.65)PY(58.65)FINT(-111.5)S(-118.4)K
0	-0.0594642	-0.0791938	0.0843573	0.368549	Y	4	0.999593	1.11e-08	135.02	112.03	P08758	94	P08758	P08758	Annexin A5	ANXA5	KLIVALMKPSRLYDAYELKHALKGAGTNEKV	33.9066	X;X;X;X;X;X;X;X;X;X;X;X;X;X;X;Phospho (STY);X;X;X;X;X;X;X;X;X;X;X;X;X;X;X	XXXXXXXXXXXPPPPPPPPPPPPXXXXXXXX	LYDAY(1)ELKHALK	LY(-33.91)DAY(33.91)ELKHALK		yes
0	0.05941	-0.183232	0.111588	0.368088	Y	3	0.966827	0.000191506	99.055	85.729	P38919;P60842-2;P60842;Q14240;Q14240-2	54;48;48;49;50	P38919	P38919	Eukaryotic initiation factor 4A-III;Eukaryotic initiation factor 4A-III, N-terminally processed;Eukaryotic initiation factor 4A-I;Eukaryotic initiation factor 4A-II	EIF4A3;EIF4A1;EIF4A2	TFDTMGLREDLLRGIYAYGFEKPSAIQQRAI	14.6458	X;X;X;X;X;X;X;X;X;X;X;X;X;X;X;Phospho (STY);X;X;X;X;X;X;X;X;X;X;X;X;X;X;X	XXXXXXXXXXXXXPPPPPPPPPPPPPPPPXX	GIY(0.967)AY(0.033)GFEKPSAIQQR	GIY(14.65)AY(-14.65)GFEKPS(-59.05)AIQQR		yes
0	-0.236077	-0.0540383	-0.0705361	0.361363	Y	2	0.998905	8.41e-17	186.94	148.37	P07948;P07948-2	193;172	P07948	P07948	Tyrosine-protein kinase Lyn	LYN	DVIKHYKIRSLDNGGYYISPRITFPCISDMI	29.6002	X;X;X;X;X;X;X;X;X;X;X;X;X;X;X;Phospho (STY);X;X;X;X;X;X;X;X;X;X;X;X;X;X;X	XXXXXXXXXPPPPPPPPPPPPXXXXXXXXXX	SLDNGGY(0.999)Y(0.001)ISPR	S(-95.84)LDNGGY(29.6)Y(-29.6)IS(-71.69)PR		yes
0	0.183713	-0.526044	0.058655	0.360323	Y	3	0.995047	0.000314775	98.407	82.467	Q86SQ0-2;Q86SQ0-3;Q86SQ0	567;594;567	Q86SQ0-2	Q86SQ0-2	Pleckstrin homology-like domain family B member 2	PHLDB2	PPPSSTFPKASSESSYLSILPKTPEGISEEQ	24.0147	X;X;X;X;X;X;X;X;X;X;X;X;X;X;X;Phospho (STY);X;X;X;X;X;X;X;X;X;X;X;X;X;X;X	XXXXXXXXXPPPPPPPPPPPPPXXXXXXXXX	ASSES(0.001)S(0.004)Y(0.995)LSILPK	AS(-36.75)S(-37.75)ES(-32.35)S(-24.01)Y(24.01)LS(-43.15)ILPK
0	-0.260802	-0.0510551	0.0328417	0.357233	Y	3	0.861635	0.00435127	72.607	54.84	Q9BZE0;Q8NBF1;Q8NEA6;P10070-4;P10070-3;Q8NEA6-2;P08151-3;P08151-2;P08151;P10070-2;P10070-1;P10071;P10070	304;333;483;230;247;638;245;332;373;230;247;618;575	Q9BZE0	Q9BZE0	Zinc finger protein GLIS2;Zinc finger protein GLIS1;Zinc finger protein GLIS3;Zinc finger protein GLI2;Zinc finger protein GLI1;Transcriptional activator GLI3;Transcriptional repressor GLI3R	GLIS2;GLIS1;GLIS3;GLI2;GLI1;GLI3	VDKPYYCKMPGCHKRYTDPSSLRKHIKAHGH	7.95338	X;X;X;X;X;X;X;X;X;X;X;X;X;X;X;Phospho (STY);X;X;X;X;X;X;X;X;X;X;X;X;X;X;X	XXXXXXXXXXXXXXXPPPPPPPPPXXXXXXX	Y(0.862)T(0.138)DPSSLRK	Y(7.95)T(-7.95)DPS(-34.3)S(-48.58)LRK
0	0.13959	0.0190881	0.197712	0.354774	Y	3	0.939253	3.3e-06	120.41	112.07	P07900;P07900-2;Q58FG0	492;614;177	P07900	P07900	Heat shock protein HSP 90-alpha;Putative heat shock protein HSP 90-alpha A5	HSP90AA1;HSP90AA5P	LKDYCTRMKENQKHIYYITGETKDQVANSAF	11.8926	X;X;X;X;X;X;X;X;X;X;X;X;X;X;X;Phospho (STY);X;X;X;X;X;X;X;X;X;X;X;X;X;X;X	XXXXXXXXXXXXXPPPPPPPPPPPPPPPPPP	HIY(0.939)Y(0.061)ITGETK	HIY(11.89)Y(-11.89)IT(-65.61)GET(-105.5)K		yes
0	0.077759	0.152702	0.0533849	0.350121	Y	2	0.998904	1.87e-08	141	119.94	O14828	35	O14828	O14828	Secretory carrier-associated membrane protein 3	SCAMP3	PFQDPAVIQHRPSRQYATLDVYNPFETREPP	29.5987	X;X;X;X;X;X;X;X;X;X;X;X;X;X;X;Phospho (STY);X;X;X;X;X;X;X;X;X;X;X;X;X;X;X	XXXXXXXXXXXXXXPPPPPPPPPPPPPPXXX	QY(0.999)AT(0.001)LDVYNPFETR	QY(29.6)AT(-29.6)LDVY(-84.03)NPFET(-115.98)R		yes
0	0.0573567	0.266588	0.124083	0.349022	Y	3	1	0.00452063	77.741	59.921	O14654	743	O14654	O14654	Insulin receptor substrate 4	IRS4	SKKRHSRSPFEDSRGYMMMFPRVSPPPAPSP	77.7407	X;X;X;X;X;X;X;X;X;X;X;X;X;X;X;Phospho (STY);Oxidation (M);Oxidation (M);Oxidation (M);X;X;X;X;X;X;X;X;X;X;X;X	XXXXXXXPPPPPPPPPPPPPPPXXXXXXXXX	GY(1)MMMFPR	GY(77.74)MMMFPR		yes
0	0.142029	0.179891	0.571135	0.346658	Y	3	0.999991	0.0236365	57.59	37.813	Q99442	46	Q99442	Q99442	Translocation protein SEC62	SEC62	NCPTKSTNMMGHRVDYFIASKAVDCLLDSKW	50.3694	X;X;X;X;X;X;X;X;X;X;X;X;X;X;X;Phospho (STY);X;X;X;X;X;X;X;X;X;X;X;X;X;X;X	XXXXXXXXXXXXXPPPPPPPPXXXXXXXXXX	VDY(1)FIASK	VDY(50.37)FIAS(-50.37)K
0	0.222626	0.00155713	0.123491	0.346529	Y	3	0.999867	6.3e-06	134.25	77.989	Q7L0J3-2;Q7L0J3	41;41	Q7L0J3-2	Q7L0J3-2	Synaptic vesicle glycoprotein 2A	SV2A	AAKKVVKGLDRVQDEYSRRSYSRFEEEDDDD	38.7452	X;X;X;X;X;X;X;X;X;X;X;X;X;X;X;Phospho (STY);X;X;X;X;X;X;X;X;X;X;X;X;X;X;X	XXXXXXXXXXXPPPPPPPPXXXXXXXXXXXX	VQDEY(1)SRR	VQDEY(38.75)S(-38.75)RR
0	0.310586	0.181652	0.0594844	0.345606	Y	3	0.994481	2.38e-13	171.56	149.13	P62937-2;P62937	19;79	P62937-2	P62937-2	Peptidyl-prolyl cis-trans isomerase A;Peptidyl-prolyl cis-trans isomerase A, N-terminally processed	PPIA	GGDFTRHNGTGGKSIYGEKFEDENFILKHTG	22.5573	X;X;X;X;X;X;X;X;X;X;X;X;X;X;X;Phospho (STY);X;X;X;X;X;X;X;X;X;X;X;X;X;X;X	XXXXXXXXXXXXXPPPPPPPPPPPPPPPXXX	S(0.006)IY(0.994)GEKFEDENFILK	S(-22.56)IY(22.56)GEKFEDENFILK		yes
0	-0.115042	0.0914153	-0.0319391	0.343209	Y	2	1	0.000117314	121.5	91.835	O00154-2;O00154-3;O00154-6;O00154-4;O00154-5;O00154-7;O00154	152;152;143;152;164;184;194	O00154-2	O00154-2	Cytosolic acyl coenzyme A thioester hydrolase	ACOT7	VVYSRQEQEEEGRKRYEAQKLERMETKWRNG	112.357	X;X;X;X;X;X;X;X;X;X;X;X;X;X;X;Phospho (STY);X;X;X;X;X;X;X;X;X;X;X;X;X;X;X	XXXXXXXXXXXXXXXPPPPPPPPXXXXXXXX	Y(1)EAQKLER	Y(112.36)EAQKLER		yes
0	0.244765	0.102507	0.336764	0.340377	Y	3	1	3.5e-05	107.03	95.91	Q08211	251	Q08211	Q08211	ATP-dependent RNA helicase A	DHX9	KLAAQSCALSLVRQLYHLGVVEAYSGLTKKK	72.0969	X;X;X;X;X;X;X;X;X;X;X;X;X;X;X;Phospho (STY);X;X;X;X;X;X;X;X;X;X;X;X;X;X;X	XXXXXXXXXXXXXPPPPPPPPPPPPPPPPXX	QLY(1)HLGVVEAYSGLTK	QLY(72.1)HLGVVEAY(-72.1)S(-87.73)GLT(-99.71)K
0	-0.0430378	-0.222404	0.106212	0.339282	Y	3	0.999994	1.92e-05	131.06	107.11	Q9Y5K6	409	Q9Y5K6	Q9Y5K6	CD2-associated protein	CD2AP	PPTKASNLLRSSGTVYPKRPEKPVPPPPPIA	52.4302	X;X;X;X;X;X;X;X;X;X;X;X;X;X;X;Phospho (STY);X;X;X;X;X;X;X;X;X;X;X;X;X;X;X	XXXXXXXXXXPPPPPPPPXXXXXXXXXXXXX	SSGTVY(1)PK	S(-68.05)S(-68.05)GT(-52.43)VY(52.43)PK
0	0.0557752	-0.162916	-0.30949	0.332629	Y	4	0.999862	5.12e-23	182.56	178.69	O00560-2;O00560	46;46	O00560-2	O00560-2	Syntenin-1	SDCBP	ILSEASAPIPHDGNLYPRLYPELSQYMGLSL	38.6812	X;X;X;X;X;X;X;X;X;X;X;X;X;X;X;Phospho (STY);X;X;X;X;X;X;X;X;X;X;X;X;X;X;X	PPPPPPPPPPPPPPPPPPXXXXXXXXXXXXX	VDKVIQAQTAFSANPANPAILSEASAPIPHDGNLY(1)PR	VDKVIQAQT(-163.75)AFS(-154.86)ANPANPAILS(-56.19)EAS(-38.68)APIPHDGNLY(38.68)PR		yes
0	0.340224	0.320396	0.167921	0.327944	Y	4	0.990678	6.39e-11	153.88	142.9	Q15019;Q15019-3;Q15019-2	17;17;52	Q15019	Q15019	Septin-2	SEPT2	SKQQPTQFINPETPGYVGFANLPNQVHRKSV	20.2642	X;X;X;X;X;X;X;X;X;X;X;X;X;X;X;Phospho (STY);X;X;X;X;X;X;X;X;X;X;X;X;X;X;X	XXPPPPPPPPPPPPPPPPPPPPPPPPPPXXX	QQPTQFINPET(0.009)PGY(0.991)VGFANLPNQVHR	QQPT(-85.36)QFINPET(-20.26)PGY(20.26)VGFANLPNQVHR		yes
0	0.164895	0.180147	-0.114071	0.327185	Y	2	0.99778	1.71e-32	266.01	237.44	P0DMV8-2;P0DMV9;P0DMV8;P48741;P11142-2;P54652;P34931;P17066;P11142	41;41;41;43;41;42;43;43;41	P0DMV8-2	P0DMV8-2	Putative heat shock 70 kDa protein 7;Heat shock cognate 71 kDa protein;Heat shock-related 70 kDa protein 2;Heat shock 70 kDa protein 1-like;Heat shock 70 kDa protein 6	HSPA7;HSPA8;HSPA2;HSPA1L;HSPA6	VEIIANDQGNRTTPSYVAFTDTERLIGDAAK	26.5322	X;X;X;X;X;X;X;X;X;X;X;X;X;X;X;Phospho (STY);X;X;X;X;X;X;X;X;X;X;X;X;X;X;X	XXXXXXXXXXXPPPPPPPPPPPPPXXXXXXX	TTPS(0.002)Y(0.998)VAFTDTER	T(-62.13)T(-57.14)PS(-26.53)Y(26.53)VAFT(-139.84)DT(-184.82)ER		yes
0	0.165232	0.039115	0.0308022	0.326127	Y	2	1	2.78e-05	113.93	88.305	Q13813-3;Q13813;Q13813-2	1020;1020;1020	Q13813-3	Q13813-3	Spectrin alpha chain, non-erythrocytic 1	SPTAN1	WKVEVNDRQGFVPAAYVKKLDPAQSASRENL	113.926	X;X;X;X;X;X;X;X;X;X;X;X;X;X;X;Phospho (STY);X;X;X;X;X;X;X;X;X;X;X;X;X;X;X	XXXXXXXXPPPPPPPPPPXXXXXXXXXXXXX	QGFVPAAY(1)VK	QGFVPAAY(113.93)VK
0	0.117089	0.152697	-0.0163226	0.325013	Y	3	1	9.84e-05	125.31	99.755	P46782	48	P46782	P46782	40S ribosomal protein S5;40S ribosomal protein S5, N-terminally processed	RPS5	ISLQDYIAVKEKYAKYLPHSAGRYAAKRFRK	86.51	X;X;X;X;X;X;X;X;X;X;X;X;X;X;X;Phospho (STY);X;X;X;X;X;X;X;X;X;X;X;X;X;X;X	XXXXXXXXXXXXXXXPPPPPPPPXXXXXXXX	Y(1)LPHSAGR	Y(86.51)LPHS(-86.51)AGR
0	0.272417	0.189841	0.313147	0.323755	Y	3	0.999998	1.16e-08	149.73	140.88	P68366-2;P68366;P68363;P68363-2;Q71U36-2;Q13748-2;Q9BQE3;Q13748;Q71U36;Q9NY65-2;Q9NY65;Q6PEY2	342;357;357;241;322;357;357;357;357;291;357;357	P68366-2	P68366-2	Tubulin alpha-4A chain;Tubulin alpha-1B chain;Tubulin alpha-1A chain;Tubulin alpha-3C/D chain;Tubulin alpha-1C chain;Tubulin alpha-8 chain;Tubulin alpha-3E chain	TUBA4A;TUBA1B;TUBA1A;TUBA3C;TUBA1C;TUBA8;TUBA3E	QFVDWCPTGFKVGINYQPPTVVPGGDLAKVQ	57.469	X;X;X;X;X;X;X;X;X;X;X;X;X;X;X;Phospho (STY);X;X;X;X;X;X;X;X;X;X;X;X;X;X;X	XXXXXXXXXXXPPPPPPPPPPPPPPPPPPXX	VGINY(1)QPPTVVPGGDLAK	VGINY(57.47)QPPT(-57.47)VVPGGDLAK
0	-0.0387664	-0.000175178	0.134726	0.318625	Y	2	0.947484	0.000826261	98.233	64.855	Q13443	778	Q13443	Q13443	Disintegrin and metalloproteinase domain-containing protein 9	ADAM9	PREVPIYANRFAVPTYAAKQPQQFPSRPPPP	12.5628	X;X;X;X;X;X;Phospho (STY);X;X;X;X;X;X;X;X;Phospho (STY);X;X;X;X;X;X;X;X;X;X;X;X;X;X;X	XXXXXXXXXXPPPPPPPPPXXXXXXXXXXXX	FAVPT(0.053)Y(0.947)AAK	FAVPT(-12.56)Y(12.56)AAK
0	-0.15603	-0.0431024	0.0975067	0.314717	Y	3	0.999997	6.98e-09	147.26	116.69	P55196-1;P55196;P55196-5;P55196-2;P55196-6;P55196-3	252;253;252;252;253;252	P55196-1	P55196-1	Afadin	MLLT4	RSSDGRPDSGGTLRIYADSLKPNIPYKTILL	55.6415	X;X;X;X;X;X;X;X;X;X;X;X;X;X;X;Phospho (STY);X;X;X;X;X;X;X;X;X;X;X;X;X;X;X	XXXXXXXXXXXXXXPPPPPPPPPPPPPXXXX	IY(1)ADSLKPNIPYK	IY(55.64)ADS(-55.64)LKPNIPY(-133.84)K		yes
0	0.139565	-0.102334	0.0835425	0.314505	Y	2	0.999146	1.46e-21	229.82	183	P08238;Q58FF8	484;260	P08238	P08238	Heat shock protein HSP 90-beta;Putative heat shock protein HSP 90-beta 2	HSP90AB1;HSP90AB2P	LSEYVSRMKETQKSIYYITGESKEQVANSAF	31.1915	X;X;X;X;X;X;X;X;X;X;X;X;X;X;X;Phospho (STY);X;X;X;X;X;X;X;X;X;X;X;X;X;X;X	XXXXXXXXXXXXXPPPPPPPPPPXXXXXXXX	SIY(0.999)Y(0.001)ITGESK	S(-40.23)IY(31.19)Y(-31.19)IT(-78.6)GES(-143.12)K		yes
0	0.213178	0.132871	0.147151	0.312965	Y	3	0.997447	1.49e-19	191.96	154.35	P63261;P60709	198;198	P63261	P63261	Actin, cytoplasmic 2;Actin, cytoplasmic 2, N-terminally processed;Actin, cytoplasmic 1;Actin, cytoplasmic 1, N-terminally processed	ACTG1;ACTB	RDLTDYLMKILTERGYSFTTTAEREIVRDIK	25.9258	X;X;X;X;X;X;X;X;X;X;X;X;X;X;X;Phospho (STY);X;X;X;X;X;X;X;X;X;X;X;X;X;X;X	XXXXXXXXXPPPPPPPPPPPPPPPXXXXXXX	ILTERGY(0.997)S(0.003)FTTTAER	ILT(-75.1)ERGY(25.93)S(-25.93)FT(-53.24)T(-76.28)T(-82.89)AER
0	0.081861	0.212121	0.10045	0.301057	Y	3	0.999932	4.34e-13	165.86	143.33	Q8IXI2-4;Q8IXI2;Q8IXI2-5;Q8IXI2-2;Q8IXI2-7;Q8IXI2-3	465;465;465;465;465;465	Q8IXI2-4	Q8IXI2-4	Mitochondrial Rho GTPase 1	RHOT1	REDHKSYYAINTVYVYGQEKYLLLHDISESE	41.7018	X;X;X;X;X;X;X;X;X;X;X;X;X;X;X;Phospho (STY);X;X;X;X;X;X;X;X;X;X;X;X;X;X;X	XXXXXPPPPPPPPPPPPPPPXXXXXXXXXXX	SYYAINTVYVY(1)GQEK	S(-114.86)Y(-108.6)Y(-102.14)AINT(-84.16)VY(-41.7)VY(41.7)GQEK
0	-0.0367855	-0.210786	0.187351	0.300714	Y	3	0.977971	2.25e-13	166.47	151.88	Q13164-4;Q13164-3;Q13164-2;Q13164	139;221;82;221	Q13164-4	Q13164-4	Mitogen-activated protein kinase 7	MAPK7	GLCTSPAEHQYFMTEYVATRWYRAPELMLSL	16.5172	X;X;X;X;X;X;X;X;X;X;X;X;Oxidation (M);X;X;Phospho (STY);X;X;X;X;X;X;X;X;X;X;X;X;X;X;X	PPPPPPPPPPPPPPPPPPPPXXXXXXXXXXX	GLCTSPAEHQYFMTEY(0.978)VAT(0.022)R	GLCT(-136.51)S(-131.56)PAEHQY(-89.44)FMT(-36.46)EY(16.52)VAT(-16.52)R
0	0.0785282	0.297244	0.0673785	0.298375	Y	2	1	0.000837927	116	67.756	P62847-2;P62847-3;P62847;P62847-4	97;97;97;97	P62847-2	P62847-2	40S ribosomal protein S24	RPS24	AKKNEPKHRLARHGLYEKKKTSRKQRKERKN	73.0388	X;X;X;X;X;X;X;X;X;X;X;X;X;X;X;Phospho (STY);X;X;X;X;X;X;X;X;X;X;X;X;X;X;X	XXXXXXXXXXXXPPPPPPXXXXXXXXXXXXX	HGLY(1)EK	HGLY(73.04)EK
0	-0.415188	-0.471647	-0.349857	0.287958	Y	3	0.994661	0.000268688	97.69	66.8	P63244	52	P63244	P63244	Guanine nucleotide-binding protein subunit beta-2-like 1	GNB2L1	DKTIIMWKLTRDETNYGIPQRALRGHSHFVS	22.7023	X;X;X;X;X;X;X;X;X;X;X;X;X;X;X;Phospho (STY);X;X;X;X;X;X;X;X;X;X;X;X;X;X;X	XXXXXXXXPPPPPPPPPPPPPXXXXXXXXXX	LTRDET(0.005)NY(0.995)GIPQR	LT(-65.39)RDET(-22.7)NY(22.7)GIPQR
0	0.206277	0.191773	-0.0155931	0.286749	Y	3	0.999138	1.43e-08	147.64	117.73	Q6IAA8	40	Q6IAA8	Q6IAA8	Ragulator complex protein LAMTOR1	LAMTOR1	PSSPPTKALNGAEPNYHSLPSARTDEQALLS	30.6438	X;X;X;X;X;X;X;X;X;X;X;X;X;X;X;Phospho (STY);X;X;X;X;X;X;X;X;X;X;X;X;X;X;X	XXXXXXXPPPPPPPPPPPPPPPPXXXXXXXX	ALNGAEPNY(0.999)HS(0.001)LPSAR	ALNGAEPNY(30.64)HS(-30.64)LPS(-71.63)AR		yes
0	0.369569	0.154901	0.141969	0.277943	Y	2	0.999998	0.00913943	82.263	60.132	P50750;P50750-2	92;209	P50750	P50750	Cyclin-dependent kinase 9	CDK9	NVVNLIEICRTKASPYNRCKGSIYLVFDFCE	57.2641	X;X;X;X;X;X;X;X;X;X;X;X;X;X;X;Phospho (STY);X;X;X;X;X;X;X;X;X;X;X;X;X;X;X	XXXXXXXXXXXXPPPPPPXXXXXXXXXXXXX	ASPY(1)NR	AS(-57.26)PY(57.26)NR
0	0.0417408	-0.211369	0.198761	0.277809	Y	3	1	2.82e-13	176.04	161.47	P06733;P13929-3;P09104-2;P13929-2;P13929;P09104	44;44;44;44;44;44	P06733	P06733	Alpha-enolase;Beta-enolase;Gamma-enolase	ENO1;ENO3;ENO2	GLFRAAVPSGASTGIYEALELRDNDKTRYMG	73.9745	X;X;X;X;X;X;X;X;X;X;X;X;X;X;X;Phospho (STY);X;X;X;X;X;X;X;X;X;X;X;X;X;X;X	XXXXPPPPPPPPPPPPPPPPPPXXXXXXXXX	AAVPSGASTGIY(1)EALELR	AAVPS(-121.58)GAS(-88.08)T(-73.97)GIY(73.97)EALELR		yes
0	-0.113738	-0.060855	-0.0695163	0.277149	Y	3	0.967553	0.0219284	50.04	21.866	P78552	402	P78552	P78552	Interleukin-13 receptor subunit alpha-1	IL13RA1	EMFGDQNDDTLHWKKYDIYEKQTKEETDSVV	14.745	X;X;X;X;X;X;X;X;X;X;X;X;X;X;X;Phospho (STY);X;X;X;X;X;X;X;X;X;X;X;X;X;X;X	XXXXXXXXXXXXXXPPPPPPPXXXXXXXXXX	KY(0.968)DIY(0.032)EK	KY(14.75)DIY(-14.75)EK
0	0.150491	0.124654	0.123531	0.274527	Y	3	0.999949	4.47e-14	199.46	156.15	Q8N257;Q16778;P33778;P23527	41;41;41;41	Q8N257	Q8N257	Histone H2B type 3-B;Histone H2B type 2-E;Histone H2B type 1-B;Histone H2B type 1-O	HIST3H2BB;HIST2H2BE;HIST1H2BB;HIST1H2BO	DGKKRKRGRKESYSIYVYKVLKQVHPDTGIS	43.0168	X;X;X;X;X;X;X;X;X;X;X;X;X;X;X;Phospho (STY);X;X;X;X;X;X;X;X;X;X;X;X;X;X;X	XXXXXXXXXPPPPPPPPPPXXXXXXXXXXXX	KESYSIY(1)VYK	KES(-93.15)Y(-69.27)S(-60.13)IY(43.02)VY(-43.02)K
0	0.0105168	0.0216304	0.32224	0.267292	Y	3	1	2.13e-13	172.91	143.56	P35232	249	P35232	P35232	Prohibitin	PHB	GLIELRKLEAAEDIAYQLSRSRNITYLPAGQ	85.2656	X;X;X;X;X;X;X;X;X;X;X;X;X;X;X;Phospho (STY);X;X;X;X;X;X;X;X;X;X;X;X;X;X;X	XXXXXXPPPPPPPPPPPPPPXXXXXXXXXXX	KLEAAEDIAY(1)QLSR	KLEAAEDIAY(85.27)QLS(-85.27)R
0	-0.161831	-0.428526	-0.0690773	0.261901	Y	3	1	0.0236509	53.597	40.801	Q9NYI0-2;Q9NYI0	29;29	Q9NYI0-2	Q9NYI0-2	PH and SEC7 domain-containing protein 3	PSD3	VNNASAHSQSVAKAKYEFLFGRSEGKAPDTS	53.5969	X;X;X;X;X;X;X;X;X;X;X;X;X;X;X;Phospho (STY);X;X;X;X;X;X;X;X;X;X;X;X;X;X;X	XXXXXXXXXXXXXPPPPPPPPPXXXXXXXXX	AKY(1)EFLFGR	AKY(53.6)EFLFGR
0	0.244183	0.311212	0.142663	0.25974	Y	3	1	0.000883211	87.806	66.434	O60828-5;O60828-3;O60828-2;O60828	87;187;187;187	O60828-5	O60828-5	Polyglutamine-binding protein 1	PQBP1	EGKERRHHRREELAPYPKSKKAVSRKDEELD	87.8065	X;X;X;X;X;X;X;X;X;X;X;X;X;X;X;Phospho (STY);X;X;X;X;X;X;X;X;X;X;X;X;X;X;X	XXXXXXXXXPPPPPPPPPXXXXXXXXXXXXX	REELAPY(1)PK	REELAPY(87.81)PK
0	0.234313	0.083696	0.0402424	0.258829	Y	3	1	1.27e-05	115.65	21.063	Q15262;Q15262-2;Q15262-3;Q15262-4;P28827;P28827-2	916;917;917;933;929;942	Q15262	Q15262	Receptor-type tyrosine-protein phosphatase kappa;Receptor-type tyrosine-protein phosphatase mu	PTPRK;PTPRM	SWDVAKKDQNRAKNRYGNIIAYDHSRVILQP	89.9464	X;X;X;X;X;X;X;X;X;X;X;X;X;X;X;Phospho (STY);X;X;X;X;X;X;X;X;X;X;X;X;X;X;X	XXXXXXXXXXXXXPPPPPPPPPPPPPXXXXX	Y(1)GNIIAYDHSR	Y(89.95)GNIIAY(-89.95)DHS(-112.04)R		yes
0	0.127872	0.199897	0.182302	0.257814	Y	3	0.942689	4.18e-12	164.93	112.54	P07947;P06241-3;P06241-2;P06241	223;214;214;214	P07947	P07947	Tyrosine-protein kinase Yes;Tyrosine-protein kinase Fyn	YES1;FYN	NVKHYKIRKLDNGGYYITTRAQFDTLQKLVK	12.258	X;X;X;X;X;X;X;X;X;X;X;X;X;X;X;Phospho (STY);X;X;X;X;X;X;X;X;X;X;X;X;X;X;X	XXXXXXXXPPPPPPPPPPPPXXXXXXXXXXX	KLDNGGY(0.056)Y(0.943)IT(0.001)TR	KLDNGGY(-12.26)Y(12.26)IT(-28.74)T(-56.95)R		yes
0	-0.267593	-0.0811146	-0.242673	0.256551	Y	2	0.997948	3.02e-10	165.63	115.44	Q99952-2;Q99952	282;389	Q99952-2	Q99952-2	Tyrosine-protein phosphatase non-receptor type 18	PTPN18	TGTGTGARSAEEAPLYSKVTPRAQRPGAHAE	26.8686	X;X;X;X;X;X;X;X;X;X;X;X;X;X;X;Phospho (STY);X;X;X;X;X;X;X;X;X;X;X;X;X;X;X	XXXXXXXXPPPPPPPPPPPPPPXXXXXXXXX	SAEEAPLY(0.998)S(0.002)K	S(-108.07)AEEAPLY(26.87)S(-26.87)K
0	0.209783	0.158176	0.144294	0.251121	Y	3	0.999072	0.000119434	103.55	87.006	Q86SQ4-2;Q86SQ4;Q86SQ4-4;Q86SQ4-3	1156;1184;1156;1184	Q86SQ4-2	Q86SQ4-2	G-protein coupled receptor 126	GPR126	NSTYLTSKSKSSSTTYFKRNSHTDNVSYEHS	30.6182	X;X;X;Phospho (STY);X;X;X;X;X;X;X;X;X;X;X;Phospho (STY);X;X;X;X;X;X;X;X;X;X;X;X;X;X;X	XXXXXXXXXXPPPPPPPPPXXXXXXXXXXXX	SSSTT(0.001)Y(0.999)FKR	S(-75.9)S(-71.95)S(-58.11)T(-42.2)T(-30.62)Y(30.62)FKR
0	0.171774	0.0366076	0.329536	0.250587	Y	3	1	0.00055438	94.09	79.658	P10809	243	P10809	P10809	60 kDa heat shock protein, mitochondrial	HSPD1	FINTSKGQKCEFQDAYVLLSEKKISSIQSIV	69.1604	X;X;X;X;X;X;X;X;X;X;X;X;X;X;X;Phospho (STY);X;X;X;X;X;X;X;X;X;X;X;X;X;X;X	XXXXXXXXXPPPPPPPPPPPPPXXXXXXXXX	CEFQDAY(1)VLLSEK	CEFQDAY(69.16)VLLS(-69.16)EK
0	0.0122511	0.0457935	0.0932186	0.24752	Y	2	1	3.4e-07	136.52	100.07	P17844-2;P17844;Q92841-1;Q92841-3;Q92841-2;Q92841	123;202;200;200;200;279	P17844-2	P17844-2	Probable ATP-dependent RNA helicase DDX5;Probable ATP-dependent RNA helicase DDX17	DDX5;DDX17	AAEYCRACRLKSTCIYGGAPKGPQIRDLERG	67.8892	X;X;X;X;X;X;X;X;X;X;X;X;X;X;X;Phospho (STY);X;X;X;X;X;X;X;X;X;X;X;X;X;X;X	XXXXXXXXXPPPPPPPPPPPPXXXXXXXXXX	STCIY(1)GGAPK	S(-76.35)T(-67.89)CIY(67.89)GGAPK
0	-0.45113	-0.196355	-0.0431457	0.243365	Y	3	0.999931	3.41e-13	160.48	126.61	Q16539-5;Q16539-3;Q16539-4;Q16539-2;Q16539	182;182;182;182;182	Q16539-5	Q16539-5	Mitogen-activated protein kinase 14	MAPK14	LDFGLARHTDDEMTGYVATRWYRAPEIMLNW	41.6414	X;X;X;X;X;X;X;X;X;X;X;X;Oxidation (M);Phospho (STY);X;Phospho (STY);X;X;X;X;X;X;X;X;X;X;X;X;X;X;X	XXXXXXXPPPPPPPPPPPPPXXXXXXXXXXX	HTDDEMT(1)GY(1)VATR	HT(-54.46)DDEMT(54.46)GY(41.64)VAT(-41.64)R
0	0.128873	-0.0668355	0.360035	0.237524	Y	3	0.999993	1.66e-23	225.97	189.38	P55196-1;P55196;P55196-5;P55196-2;P55196-6;P55196-3	94;94;94;94;94;94	P55196-1	P55196-1	Afadin	MLLT4	FRPDMRMLSSPKYSLYEVHVSGERRLDIDEK	52.2452	X;X;X;X;X;X;X;X;X;X;X;X;X;X;X;Phospho (STY);X;X;X;X;X;X;X;X;X;X;X;X;X;X;X	XXXXXXXXXXXXPPPPPPPPPPPPXXXXXXX	YSLY(1)EVHVSGER	Y(-61.16)S(-52.25)LY(52.25)EVHVS(-144.26)GER		yes
0	0.258416	0.186765	0.12044	0.234321	Y	3	0.999998	3.06e-14	204.07	163.57	O60814;P57053;Q99880;Q99879;Q99877;Q93079;Q5QNW6;P62807;P58876;Q5QNW6-2	41;41;41;41;41;41;41;41;41;41	O60814;Q99880	Q99880	Histone H2B type 1-K;Histone H2B type F-S;Histone H2B type 1-L;Histone H2B type 1-M;Histone H2B type 1-N;Histone H2B type 1-H;Histone H2B type 2-F;Histone H2B type 1-C/E/F/G/I;Histone H2B type 1-D	HIST1H2BK;H2BFS;HIST1H2BL;HIST1H2BM;HIST1H2BN;HIST1H2BH;HIST2H2BF;HIST1H2BC;HIST1H2BD	DGKKRKRSRKESYSVYVYKVLKQVHPDTGIS	57.1119	X;X;X;X;X;X;X;X;X;X;X;X;X;X;X;Phospho (STY);X;X;X;X;X;X;X;X;X;X;X;X;X;X;X	XXXXXXXPPPPPPPPPPPPXXXXXXXXXXXX	ESYSVY(1)VYK	ES(-83.74)Y(-77.21)S(-64.55)VY(57.11)VY(-57.11)K
0	-0.0987397	0.103261	0.366327	0.229492	Y	3	0.977233	4.28e-05	119.46	111.12	P25116	420	P25116	P25116	Proteinase-activated receptor 1	F2R	ASKMDTCSSNLNNSIYKKLLT__________	16.3269	X;X;X;Oxidation (M);X;X;X;X;X;X;X;X;X;X;X;Phospho (STY);X;X;X;X;X;X;X;X;X;X;X;X;X;X;X	XXXPPPPPPPPPPPPPPPXXXXXXXXXXXXX	MDTCSSNLNNS(0.023)IY(0.977)KK	MDT(-103.94)CS(-82.86)S(-77.14)NLNNS(-16.33)IY(16.33)KK
0	-0.0823169	-0.368135	-0.0922737	0.226667	Y	3	0.999993	0.0155963	64.918	28.601	P18433-4;P18433-2;P18433-3;P18433	262;262;271;271	P18433-4	P18433-4	Receptor-type tyrosine-protein phosphatase alpha	PTPRA	TCEAASKEENKEKNRYVNILPYDHSRVHLTP	51.9528	X;X;X;X;X;X;X;X;X;X;X;X;X;X;X;Phospho (STY);X;X;X;X;X;X;X;X;X;X;X;X;X;X;X	XXXXXXXXXXXXXXXPPPPPPPPPPPXXXXX	Y(1)VNILPYDHSR	Y(51.95)VNILPY(-51.95)DHS(-62.83)R
0	-0.0927896	-0.0997382	-0.0145461	0.22523	Y	2	0.996478	0.000238478	100.82	92.775	Q96JJ3-3;Q96JJ3	629;717	Q96JJ3-3	Q96JJ3-3	Engulfment and cell motility protein 2	ELMO2	APPPIPKEPSSYDFVYHYG____________	24.5173	X;X;X;X;X;X;X;X;X;X;X;X;X;X;X;Phospho (STY);X;X;X;X;X;X;X;X;X;X;X;X;X;X;X	XXXXXXXPPPPPPPPPPPPXXXXXXXXXXXX	EPSSYDFVY(0.996)HY(0.004)G	EPS(-76.59)S(-71.46)Y(-61.24)DFVY(24.52)HY(-24.52)G
0	0.326306	0.291653	-0.0643674	0.224844	Y	3	0.999953	0.000272039	104.2	79.362	P24534	126	P24534	P24534	Elongation factor 1-beta	EEF1B2	ESEEAKRLREERLAQYESKKAKKPALVAKSS	43.2901	X;X;X;X;X;X;X;X;X;X;X;X;X;X;X;Phospho (STY);X;X;X;X;X;X;X;X;X;X;X;X;X;X;X	XXXXXXXXXXXXPPPPPPPPXXXXXXXXXXX	LAQY(1)ESKK	LAQY(43.29)ES(-43.29)KK
0	0.21399	-0.444932	0.0273254	0.222507	Y	3	1	0.00297913	76.228	53.587	P06576	196	P06576	P06576	ATP synthase subunit beta, mitochondrial	ATP5B	EILVTGIKVVDLLAPYAKGGKIGLFGGAGVG	59.9076	X;X;X;X;X;X;X;X;X;X;X;X;X;X;X;Phospho (STY);X;X;X;X;X;X;X;X;X;X;X;X;X;X;X	XXXXXXXXPPPPPPPPPPXXXXXXXXXXXXX	VVDLLAPY(1)AK	VVDLLAPY(59.91)AK
0	0.0430843	0.174656	-0.236001	0.221094	Y	3	0.996419	2.15e-05	105.46	71.208	O43493-6;O43493-4;O43493-2;O43493-5;O43493-3;O43493	274;372;430;430;430;430	O43493-6	O43493-6	Trans-Golgi network integral membrane protein 2	TGOLN2	EGKRSKVTRRPKASDYQRLDQKS________	24.4438	X;X;X;X;X;X;X;X;X;X;X;X;X;X;X;Phospho (STY);X;X;X;X;X;X;X;X;X;X;X;X;X;X;X	XXXXXXXXXXXXPPPPPPPPPPPXXXXXXXX	AS(0.004)DY(0.996)QRLDQK	AS(-24.44)DY(24.44)QRLDQK
0	-0.0183064	0.0793845	0.478054	0.218076	Y	3	0.996595	3.32e-08	132.64	120.99	P78324-4;P78324	428;429	P78324-4	P78324-4	Tyrosine-protein phosphatase non-receptor type substrate 1	SIRPA	EKNAREITQDTNDITYADLNLPKGKKPAPQA	24.6667	X;X;X;X;X;X;X;X;X;X;X;X;X;X;X;Phospho (STY);X;X;X;X;X;X;X;X;X;X;X;X;X;X;X	XXXXXPPPPPPPPPPPPPPPPPPXXXXXXXX	EITQDTNDIT(0.003)Y(0.997)ADLNLPK	EIT(-74.55)QDT(-56.15)NDIT(-24.67)Y(24.67)ADLNLPK
0	0.548692	0.197723	0.459442	0.217748	Y	4	0.999906	0.00986952	62.203	55.767	Q9C0B0	232	Q9C0B0	Q9C0B0	RING finger protein unkempt homolog	UNK	KTEPCKKPPRLCRQGYACPYYHNSKDRRRSP	41.6067	X;X;X;X;X;X;X;X;X;X;X;X;X;X;X;Phospho (STY);X;X;X;X;X;X;X;Phospho (STY);X;X;X;X;X;X;X	XXXXXXXXXXXXXPPPPPPPPPPPPPPPXXX	QGY(1)ACPYY(0.001)HNS(0.998)KDRR	QGY(41.61)ACPY(-34.44)Y(-28.36)HNS(28.36)KDRR
0	-0.119268	-0.265844	0.130411	0.21765	Y	4	0.999999	5.42e-05	89.923	83.807	Q8N8Z6	589	Q8N8Z6	Q8N8Z6	Discoidin, CUB and LCCL domain-containing protein 1	DCBLD1	AGGHYDCPQRAGRHEYALPLAPPEPEYATPI	59.4521	X;X;X;X;X;X;X;X;X;X;X;X;X;X;X;Phospho (STY);X;X;X;X;X;X;X;X;X;X;Phospho (STY);X;X;X;X	XXXXXXXXXXPPPPPPPPPPPPPPPPPPPPP	AGRHEY(1)ALPLAPPEPEY(0.89)AT(0.11)PIVER	AGRHEY(59.45)ALPLAPPEPEY(9.09)AT(-9.09)PIVER
0	0.430812	0.121026	-0.131053	0.21736	Y	2	0.973552	0.00812923	85.359	13.339	P52565	175	P52565	P52565	Rho GDP-dissociation inhibitor 1	ARHGDIA	TPVEEAPKGMLARGSYSIKSRFTDDDKTDHL	15.9273	X;X;X;X;X;X;X;X;X;X;X;X;X;X;X;Phospho (STY);X;X;X;X;X;X;X;X;X;X;X;X;X;X;X	XXXXXXXXXXXXXPPPPPPXXXXXXXXXXXX	GS(0.002)Y(0.974)S(0.025)IK	GS(-27.9)Y(15.93)S(-15.93)IK		yes
0	0.0562182	0.191905	0.272319	0.210476	Y	2	0.994553	1.47e-12	177.77	156.5	P07948;P07948-2	194;173	P07948	P07948	Tyrosine-protein kinase Lyn	LYN	VIKHYKIRSLDNGGYYISPRITFPCISDMIK	23.075	X;X;X;X;X;X;X;X;X;X;X;X;X;X;X;Phospho (STY);X;X;X;X;X;X;X;X;X;X;X;X;X;X;X	XXXXXXXXPPPPPPPPPPPPXXXXXXXXXXX	SLDNGGY(0.005)Y(0.995)IS(0.001)PR	S(-93.02)LDNGGY(-23.08)Y(23.08)IS(-32.59)PR		yes
0	-0.0135224	-0.0293485	0.123336	0.209155	Y	3	0.999996	1.91e-08	156.48	127.52	Q9UBX3;Q9UBX3-2	82;82	Q9UBX3	Q9UBX3	Mitochondrial dicarboxylate carrier	SLC25A10	SLCRQMTYSLTRFAIYETVRDRVAKGSQGPL	53.9566	X;X;X;X;X;X;X;X;X;X;X;X;X;X;X;Phospho (STY);X;X;X;X;X;X;X;X;X;X;X;X;X;X;X	XXXXXXXXXXXXPPPPPPPPPPXXXXXXXXX	FAIY(1)ETVRDR	FAIY(53.96)ET(-53.96)VRDR		yes
0	-0.041154	0.0133905	0.250475	0.208105	Y	3	0.974701	0.000214021	100.22	73.125	Q9HAK2-2;Q9H4W6-2;Q9UH73-2;Q9HAK2;Q9UH73;Q9H4W6	134;404;381;403;412;413	Q9HAK2-2	Q9HAK2-2	Transcription factor COE2;Transcription factor COE3;Transcription factor COE1	EBF2;EBF3;EBF1	QDIILKRAADIAEALYSVPRNPSQLPALSSS	15.8577	X;X;X;X;X;X;X;X;X;X;X;X;X;X;X;Phospho (STY);X;X;X;X;X;X;X;X;X;X;X;X;X;X;X	XXXXXXXPPPPPPPPPPPPPXXXXXXXXXXX	AADIAEALY(0.975)S(0.025)VPR	AADIAEALY(15.86)S(-15.86)VPR
0	0.387664	0.20795	-0.0197932	0.207149	Y	2	0.795615	0.0342844	60.788	33.471	P62979	85	P62979	P62979	Ubiquitin-40S ribosomal protein S27a;Ubiquitin;40S ribosomal protein S27a	RPS27A	VLRLRGGAKKRKKKSYTTPKKNKHKRKKVKL	6.26268	X;X;X;X;X;X;X;X;X;X;X;X;X;X;X;Phospho (STY);X;X;X;X;X;X;X;X;X;X;X;X;X;X;X	XXXXXXXXXXXXXXPPPPPPXXXXXXXXXXX	S(0.013)Y(0.796)T(0.188)T(0.003)PK	S(-17.79)Y(6.26)T(-6.26)T(-24.2)PK		yes
0	0.0749852	0.148408	0.137446	0.201991	Y	3	0.997927	0.000161299	105.98	67.672	Q8NFH8-3;Q8NFH8-2;Q8NFH8-4;Q8NFH8	72;73;211;212	Q8NFH8-3	Q8NFH8-3	RalBP1-associated Eps domain-containing protein 2	REPS2	PSSPPHYQRVPLSHGYSKLRSSAEQMHPAPY	26.8268	X;X;X;X;X;X;X;X;X;X;X;X;X;X;X;Phospho (STY);X;X;X;X;X;X;X;X;X;X;X;X;X;X;X	XXXXXXXXXPPPPPPPPPXXXXXXXXXXXXX	VPLSHGY(0.998)S(0.002)K	VPLS(-61.66)HGY(26.83)S(-26.83)K
0	0.271097	0.148213	0.204268	0.199691	Y	2	1	0.00455925	75.189	50.191	P21333-2;P21333	775;775	P21333-2	P21333-2	Filamin-A	FLNA	RVNVGAGSHPNKVKVYGPGVAKTGLKAHEPT	75.1893	X;X;X;X;X;X;X;X;X;X;X;X;X;X;X;Phospho (STY);X;X;X;X;X;X;X;X;X;X;X;X;X;X;X	XXXXXXXXXXXXXXPPPPPPPPXXXXXXXXX	VY(1)GPGVAK	VY(75.19)GPGVAK
0	0.23878	0.0897441	0.0500493	0.193711	Y	3	0.99999	1.9e-05	107.79	97.32	P05141	191	P05141	P05141	ADP/ATP translocase 2;ADP/ATP translocase 2, N-terminally processed	SLC25A5	GFNVSVQGIIIYRAAYFGIYDTAKGMLPDPK	49.8999	X;X;X;X;X;X;X;X;X;X;X;X;X;X;X;Phospho (STY);X;X;X;X;X;X;X;X;X;X;X;X;X;X;X	XXXXXXXXXXXXXPPPPPPPPPPPXXXXXXX	AAY(1)FGIYDTAK	AAY(49.9)FGIY(-49.9)DT(-86.12)AK
0	0.227976	-0.013801	0.172553	0.193519	Y	3	1	4.14e-08	134.56	94.94	P62805	89	P62805	P62805	Histone H4	HIST1H4A	TEHAKRKTVTAMDVVYALKRQGRTLYGFGG_	82.865	Phospho (STY);X;X;X;X;X;X;X;X;X;X;Oxidation (M);X;X;X;Phospho (STY);X;X;X;X;X;X;X;X;X;Phospho (STY);X;X;X;X;X	XXXXXXPPPPPPPPPPPPPPXXXXXXXXXXX	TVTAMDVVY(1)ALKR	T(-99.52)VT(-82.86)AMDVVY(82.86)ALKR
0	-0.183285	-0.0351137	0.0219854	0.190335	Y	3	1	0.0114161	66.056	48.825	P32969	122	P32969	P32969	60S ribosomal protein L9	RPL9	ENGSLVEIRNFLGEKYIRRVRMRPGVACSVS	66.0557	X;X;X;X;X;X;X;X;X;X;X;X;X;X;X;Phospho (STY);X;X;X;X;X;X;X;X;X;X;X;X;X;X;X	XXXXXXXXXPPPPPPPPPXXXXXXXXXXXXX	NFLGEKY(1)IR	NFLGEKY(66.06)IR
0	0.264725	0.179969	-0.132253	0.189958	Y	2	0.999978	0.00942694	81.381	11.949	P42224-2;P42224	701;701	P42224-2	P42224-2	Signal transducer and activator of transcription 1-alpha/beta	STAT1	EAPEPMELDGPKGTGYIKTELISVSEV____	46.4889	X;X;X;X;X;X;X;X;X;X;X;X;X;X;X;Phospho (STY);X;X;X;X;X;X;X;X;X;X;X;X;X;X;X	XXXXXXXXXXXXPPPPPPXXXXXXXXXXXXX	GTGY(1)IK	GT(-46.49)GY(46.49)IK		yes
0	0.0716236	0.100789	-0.160311	0.189617	Y	2	0.999769	0.0247885	67.035	37.491	P43243-2;P43243;Q5T481	514;802;1162	P43243-2	P43243-2	Matrin-3;RNA-binding protein 20	MATR3;RBM20	NVPVGIDYVIPKTGFYCKLCSLFYTNEEVAK	36.3662	X;X;X;X;X;X;X;X;X;X;X;X;X;X;X;Phospho (STY);X;X;X;X;X;X;X;X;X;X;X;X;X;X;X	XXXXXXXXXXXXPPPPPPXXXXXXXXXXXXX	TGFY(1)CK	T(-36.37)GFY(36.37)CK
0	-0.408288	0.264165	-0.0861025	0.189253	Y	3	1	0.00082522	86.772	67.475	Q08345-2;Q08345-6;Q08345;Q08345-5	484;502;484;484	Q08345-2	Q08345-2	Epithelial discoidin domain-containing receptor 1	DDR1	TILINNRPGPREPPPYQEPRPRGNPPHSAPC	86.7722	X;X;X;X;X;X;X;X;X;X;X;X;X;X;X;Phospho (STY);X;X;X;X;X;X;X;X;X;X;X;X;X;X;X	XXXXXXXXXXXPPPPPPPPPPPXXXXXXXXX	EPPPY(1)QEPRPR	EPPPY(86.77)QEPRPR
0	0.182481	0.0556338	0.278271	0.188403	Y	2	0.934294	0.00585231	80.229	53.845	Q9UK61-2;Q9UK61-3;Q9UK61-4;Q9UK61	193;589;589;589	Q9UK61-2	Q9UK61-2	Protein FAM208A	FAM208A	IMFPYDSRLDDKKFLYSAPRNKSHIDTCLHA	11.5288	X;X;X;X;X;X;X;X;X;X;X;X;X;X;X;Phospho (STY);X;X;X;X;X;X;X;X;X;X;X;X;X;X;X	XXXXXXXXXXXXXPPPPPPPXXXXXXXXXXX	FLY(0.934)S(0.066)APR	FLY(11.53)S(-11.53)APR
0	-0.00110692	0.272102	-0.220883	0.183337	Y	4	1	0.00368677	75.738	48.776	P29692-3;P29692-4;P29692;P29692-2	158;163;182;548	P29692-3	P29692-3	Elongation factor 1-delta	EEF1D	EDKEAAQLREERLRQYAEKKAKKPALVAKSS	50.0403	X;X;X;X;X;X;X;X;X;X;X;X;X;X;X;Phospho (STY);X;X;X;X;X;X;X;X;X;X;X;X;X;X;X	XXXXXXXXXXXXPPPPPPPPXXXXXXXXXXX	LRQY(1)AEKK	LRQY(50.04)AEKK
0	-0.0425389	-0.0871077	0.0362508	0.183335	Y	2	0.993431	0.00812923	85.359	46.21	Q16881-7;Q16881-5;Q16881-2;Q16881-4;Q16881-3;Q16881-6;Q16881	114;152;196;204;251;267;302	Q16881-7	Q16881-7	Thioredoxin reductase 1, cytoplasmic	TXNRD1	PHRIKATNNKGKEKIYSAERFLIATGERPRY	21.7966	X;X;X;X;X;X;X;X;X;X;X;X;X;X;X;Phospho (STY);X;X;X;X;X;X;X;X;X;X;X;X;X;X;X	XXXXXXXXXXXXPPPPPPPPXXXXXXXXXXX	IY(0.993)S(0.007)AER	IY(21.8)S(-21.8)AER
0	0.333903	0.153705	0.0426043	0.17753	Y	3	1	0.0102045	68.64	7.6342	Q5VST9;Q5VST9-2;Q5VST9-6	7959;7960;8474	Q5VST9	Q5VST9	Obscurin	OBSCN	LRVFVRNREKRRALLYKRHNLAQVR______	68.6397	X;X;X;X;X;X;X;X;X;X;X;X;X;X;X;Phospho (STY);X;X;X;X;X;X;X;X;X;X;X;X;X;X;X	XXXXXXXXXXXXPPPPPPXXXXXXXXXXXXX	ALLY(1)KR	ALLY(68.64)KR
0	0.182925	0.099541	-0.33147	0.174444	Y	3	0.999998	0.0078531	68.224	48.565	P16989-3;P16989	228;228	P16989-3	P16989-3	Y-box-binding protein 3	YBX3	DRQFSGARNQLRRPQYRPQYRQRRFPPYHVG	57.0592	X;X;X;X;X;X;X;X;X;X;X;X;X;X;X;Phospho (STY);X;X;X;X;X;X;X;X;X;X;X;X;X;X;X	XXXXXXXXXXXXPPPPPPPPPXXXXXXXXXX	RPQY(1)RPQYR	RPQY(57.06)RPQY(-57.06)R
0	-0.0694065	0.0261071	0.026535	0.169981	Y	3	0.998762	2.52e-08	147.73	113.33	P07947;P06241-3;P06241-2;P06241	222;213;213;213	P07947	P07947	Tyrosine-protein kinase Yes;Tyrosine-protein kinase Fyn	YES1;FYN	DNVKHYKIRKLDNGGYYITTRAQFDTLQKLV	29.069	X;X;X;X;X;X;X;X;X;X;X;X;X;X;X;Phospho (STY);X;X;X;X;X;X;X;X;X;X;X;X;X;X;X	XXXXXXXXXPPPPPPPPPPPPXXXXXXXXXX	LDNGGY(0.999)Y(0.001)ITTR	LDNGGY(29.07)Y(-29.07)IT(-77.73)T(-84.33)R		yes
0	0.334763	-0.0146152	0.232601	0.169436	Y	2	1	0.000158927	106.36	82.326	P24534	182	P24534	P24534	Elongation factor 1-beta	EEF1B2	ADGLVWGSSKLVPVGYGIKKLQIQCVVEDDK	91.7826	X;X;X;X;X;X;X;X;X;X;X;X;X;X;X;Phospho (STY);X;X;X;X;X;X;X;X;X;X;X;X;X;X;X	XXXXXXXXXXPPPPPPPPPXXXXXXXXXXXX	LVPVGY(1)GIK	LVPVGY(91.78)GIK
0	-0.212033	-0.0628395	-0.269384	0.161229	Y	3	1	9.78e-06	133.58	105.37	P62829	38	P62829	P62829	60S ribosomal protein L23	RPL23	GAVINCADNTGAKNLYIISVKGIKGRLNRLP	80.8566	X;X;X;X;X;X;X;X;X;X;X;X;X;X;X;Phospho (STY);X;X;X;X;X;X;X;X;X;X;X;X;X;X;X	XXXXXXXXXXXXXPPPPPPPPXXXXXXXXXX	NLY(1)IISVK	NLY(80.86)IIS(-80.86)VK		yes
0	-0.0881649	-0.00949653	-0.0399938	0.160949	Y	3	0.998353	3.06e-27	219.23	189.87	Q9NRY4	1105	Q9NRY4	Q9NRY4	Rho GTPase-activating protein 35	ARHGAP35	PMDAVVKPRNEEENIYSVPHDSTQGKIITIR	27.8254	X;X;X;X;X;X;X;X;X;X;X;X;X;X;X;Phospho (STY);X;X;X;X;X;X;X;X;X;X;X;X;X;X;X	XXXXXXXXXPPPPPPPPPPPPPPPPPXXXXX	NEEENIY(0.998)S(0.002)VPHDSTQGK	NEEENIY(27.83)S(-27.83)VPHDS(-113.85)T(-132.4)QGK
0	0.16296	0.0505661	0.0102358	0.15951	Y	2	0.999232	2.51e-12	171.62	149.96	Q8WXI2-5	434	Q8WXI2-5	Q8WXI2-5			KGRSSSQGRRESTPTYENSLLRYMSNEKIAQ	31.1632	X;X;X;X;X;X;X;X;X;X;X;X;X;X;X;Phospho (STY);X;X;X;X;X;X;X;X;X;X;X;X;X;X;X	XXXXXXXXXXPPPPPPPPPPPPXXXXXXXXX	ESTPT(0.001)Y(0.999)ENSLLR	ES(-104.64)T(-75.39)PT(-31.16)Y(31.16)ENS(-54.78)LLR
0	-0.0964916	0.0463068	0.0367555	0.157341	Y	3	1	1.35e-05	109.15	82.359	Q04656-5;Q04656;Q04656-2;Q04656-3	244;244;258;325	Q04656-5	Q04656-5	Copper-transporting ATPase 1	ATP7A	IEAMGFPAFVKKQPKYLKLGAIDVERLKNTP	109.145	X;X;X;X;X;X;X;X;X;X;X;X;X;X;X;Phospho (STY);X;X;X;X;X;X;X;X;X;X;X;X;X;X;X	XXXXXXXXXXXXXXXPPPPPPPPPPPXXXXX	Y(1)LKLGAIDVER	Y(109.15)LKLGAIDVER
0	0.129387	-0.0887975	-0.0162999	0.156409	Y	2	0.806596	0.00188158	90.15	49.156	Q9UQE7	136	Q9UQE7	Q9UQE7	Structural maintenance of chromosomes protein 3	SMC3	VMNLLESAGFSRSNPYYIVKQGKINQMATAP	6.20268	X;X;X;X;X;X;X;X;X;X;X;X;X;X;X;Phospho (STY);X;X;X;X;X;X;X;X;X;X;X;X;X;X;X	XXXXXXXXXXXXPPPPPPPPXXXXXXXXXXX	SNPY(0.807)Y(0.193)IVK	S(-43.69)NPY(6.2)Y(-6.2)IVK
0	-0.25983	0.13007	0.0256938	0.156408	Y	3	1	0.00117351	83.081	73.759	P63010-3;Q10567-4;P63010;Q10567-3;Q10567-2;Q10567;P63010-2	79;136;136;136;136;136;136	P63010-3	P63010-3	AP-2 complex subunit beta;AP-1 complex subunit beta-1	AP2B1;AP1B1	YLCEPLRKCLKDEDPYVRKTAAVCVAKLHDI	83.0814	X;X;X;X;X;X;X;X;X;X;X;X;X;X;X;Phospho (STY);X;X;X;X;X;X;X;X;X;X;X;X;X;X;X	XXXXXXXXPPPPPPPPPPXXXXXXXXXXXXX	CLKDEDPY(1)VR	CLKDEDPY(83.08)VR		yes
0	0.130032	-0.0645159	-0.0746438	0.155763	Y	2	1	0.00148151	112.56	44.798	P06733;P06733-2	407;314	P06733	P06733	Alpha-enolase	ENO1	QIKTGAPCRSERLAKYNQLLRIEEELGSKAK	112.558	X;X;X;X;X;X;X;X;X;X;X;X;X;X;X;Phospho (STY);X;X;X;X;X;X;X;X;X;X;X;X;X;X;X	XXXXXXXXXXXXXXXPPPPPPXXXXXXXXXX	Y(1)NQLLR	Y(112.56)NQLLR		yes
0	0.039426	0.227872	-0.096607	0.151267	Y	2	0.999998	4.28e-15	198.62	124.25	P37108	27	P37108	P37108	Signal recognition particle 14 kDa protein	SRP14	ELTRLFQKCRTSGSVYITLKKYDGRTKPIPK	57.359	X;X;X;X;X;X;X;X;X;X;X;X;X;X;X;Phospho (STY);X;X;X;X;X;X;X;X;X;X;X;X;X;X;X	XXXXXXXXXXPPPPPPPPPPXXXXXXXXXXX	TSGSVY(1)ITLK	T(-104.85)S(-112.81)GS(-57.36)VY(57.36)IT(-64.06)LK
0	-0.0247877	0.0577874	-0.050797	0.150689	Y	3	0.999749	1.29e-05	118.55	109.23	P61604	76	P61604	P61604	10 kDa heat shock protein, mitochondrial	HSPE1	QPVSVKVGDKVLLPEYGGTKVVLDDKDYFLF	36.0034	X;X;X;X;X;X;X;X;X;X;X;X;X;X;X;Phospho (STY);X;X;X;X;X;X;X;X;X;X;X;X;X;X;X	XXXXXXPPPPPPPPPPPPPPXXXXXXXXXXX	VLLPEY(1)GGTK	VLLPEY(36)GGT(-36)K
0	0.000363827	-0.0566948	0.102578	0.140999	Y	3	0.999608	5.24e-28	234.77	222.1	Q9BUJ2-3;Q9BUJ2-4;Q9BUJ2-2;Q9BUJ2	396;410;510;510	Q9BUJ2-3	Q9BUJ2-3	Heterogeneous nuclear ribonucleoprotein U-like protein 1	HNRNPUL1	AARKKRNYILDQTNVYGSAQRRKMRPFEGFQ	34.0712	X;X;X;X;X;X;X;X;X;X;X;X;X;X;X;Phospho (STY);X;X;X;X;X;X;X;X;X;X;X;X;X;X;X	XXXXXXPPPPPPPPPPPPPPPPXXXXXXXXX	NYILDQTNVY(1)GSAQR	NY(-115.79)ILDQT(-73.12)NVY(34.07)GS(-34.07)AQR
0	0.0846575	0.218824	0.0691437	0.133933	Y	2	1	0.000974707	93.345	81.614	P07910-4;P07910-2;P07910	57;57;57	P07910-4	P07910-4	Heterogeneous nuclear ribonucleoproteins C1/C2	HNRNPC	KIVGCSVHKGFAFVQYVNERNARAAVAGEDG	93.3452	X;X;X;X;X;X;X;X;X;X;X;X;X;X;X;Phospho (STY);X;X;X;X;X;X;X;X;X;X;X;X;X;X;X	XXXXXXXXXPPPPPPPPPPPXXXXXXXXXXX	GFAFVQY(1)VNER	GFAFVQY(93.35)VNER
0	0.114781	-0.110249	0.0648119	0.133576	Y	3	1	0.0210294	48.998	30.02	Q02818	179	Q02818	Q02818	Nucleobindin-1	NUCB1	DLAQYDAAHHEEFKRYEMLKEHERRRYLESL	48.998	X;X;X;X;X;X;X;X;X;X;X;X;X;X;X;Phospho (STY);X;Oxidation (M);X;X;X;X;X;X;X;X;X;X;X;X;X	XXXXXXXXXXXXXXXPPPPPPPPPXXXXXXX	Y(1)EMLKEHER	Y(49)EMLKEHER
0	0.29026	-0.33208	0.247978	0.128752	Y	2	1	8.27e-06	144.12	115.95	Q9H857-4;Q9H857;Q9H857-3;Q9H857-2	356;486;498;523	Q9H857-4	Q9H857-4	5'-nucleotidase domain-containing protein 2	NT5DC2	ASLSCLLNYRVDFTFYPRRTPLQHEAPLWMD	75.8982	X;X;X;X;X;X;X;X;X;X;X;X;X;X;X;Phospho (STY);X;X;X;X;X;X;X;X;X;X;X;X;X;X;X	XXXXXXXXXXPPPPPPPPXXXXXXXXXXXXX	VDFTFY(1)PR	VDFT(-75.9)FY(75.9)PR
0	-0.29242	-0.0755811	-0.0851923	0.128592	Y	3	0.999844	0.000196586	100.22	85.061	Q7Z4W1	149	Q7Z4W1	Q7Z4W1	L-xylulose reductase	DCXR	VSSQCSQRAVTNHSVYCSTKGALDMLTKVMA	39.1123	X;X;X;X;X;X;X;X;X;X;X;X;X;X;X;Phospho (STY);X;X;X;X;X;X;X;X;X;X;X;X;X;X;X	XXXXXXXXPPPPPPPPPPPPXXXXXXXXXXX	AVTNHSVY(1)CSTK	AVT(-74.4)NHS(-51.32)VY(39.11)CS(-39.11)T(-45.88)K
0	-0.36387	-1.34334	-0.353133	0.128173	Y	3	0.999607	9.91e-28	230.23	210.48	Q63HR2-5;Q63HR2-2;Q63HR2-6;Q63HR2;Q63HR2-4	359;483;483;483;493	Q63HR2-5	Q63HR2-5	Tensin-like C1 domain-containing phosphatase	TENC1	DGSLTHTRGPLDGSPYAQVQRPPRQTPPAPS	34.0553	X;X;X;X;X;X;X;X;X;X;X;X;X;X;X;Phospho (STY);X;X;X;X;X;X;X;X;X;X;X;X;X;X;X	XXXXXXXXPPPPPPPPPPPPPPPPXXXXXXX	GPLDGSPY(1)AQVQRPPR	GPLDGS(-34.06)PY(34.06)AQVQRPPR
0	-0.202414	0.00225228	-0.105952	0.121821	Y	3	1	8.85e-09	148.41	137.4	P38919	155	P38919	P38919	Eukaryotic initiation factor 4A-III;Eukaryotic initiation factor 4A-III, N-terminally processed	EIF4A3	CIGGTNVGEDIRKLDYGQHVVAGTPGRVFDM	87.7516	X;X;X;X;X;X;X;X;X;X;X;X;X;X;X;Phospho (STY);X;X;X;X;X;X;X;X;X;X;X;X;X;X;X	XXXXXXXXXXXXPPPPPPPPPPPPPPPXXXX	KLDY(1)GQHVVAGTPGR	KLDY(87.75)GQHVVAGT(-87.75)PGR
0	0.0944499	-0.0283362	0.275648	0.1186	Y	4	0.99999	3.86e-13	160.55	140.97	Q9UPN6	17	Q9UPN6	Q9UPN6	Protein SCAF8	SCAF8	EAVKTFNSELYSLNDYKPPISKAKMTQITKA	51.5069	X;X;X;X;X;X;X;X;X;X;X;X;X;X;X;Phospho (STY);X;X;X;X;X;X;X;X;X;X;X;X;X;X;X	XXXXPPPPPPPPPPPPPPPPPPXXXXXXXXX	TFNSELYSLNDY(1)KPPISK	T(-123.18)FNS(-112.47)ELY(-71.98)S(-55.67)LNDY(51.51)KPPIS(-51.51)K
0	0.0254831	-0.00125425	0.214553	0.110146	Y	4	0.999992	3.53e-36	242.48	200.13	Q96QZ7-4;Q96QZ7-3;Q96QZ7-5;Q96QZ7-7;Q96QZ7-6;Q96QZ7-2;Q96QZ7	373;373;373;373;373;373;373	Q96QZ7-4	Q96QZ7-4	Membrane-associated guanylate kinase, WW and PDZ domain-containing protein 1	MAGI1	ELELPAGWEKIEDPVYGIYYVDHINRKTQYE	51.789	X;X;X;X;X;X;X;X;X;X;X;X;X;X;X;Phospho (STY);X;X;X;X;X;X;X;X;X;X;X;X;X;X;X	XXXXXXXXXXPPPPPPPPPPPPPPPPPXXXX	IEDPVY(1)GIYYVDHINRK	IEDPVY(51.79)GIY(-51.79)Y(-59.04)VDHINRK
0	-0.185547	-0.191878	-0.356525	0.109987	Y	2	0.999998	0.00574577	80.787	53.825	Q13873	589	Q13873	Q13873	Bone morphogenetic protein receptor type-2	BMPR2	STPLTIGEKNRNSINYERQQAQARIPSPETS	56.6983	X;X;X;X;X;X;X;X;X;X;X;X;X;X;X;Phospho (STY);X;X;X;X;X;X;X;X;X;X;X;X;X;X;X	XXXXXXXXXXXPPPPPPPXXXXXXXXXXXXX	NSINY(1)ER	NS(-56.7)INY(56.7)ER
0	-0.2131	-0.340659	-0.0786624	0.109819	Y	3	0.999999	2.73e-05	115.1	108.91	Q9NXD2	708	Q9NXD2	Q9NXD2	Myotubularin-related protein 10	MTMR10	SRMLRQQRSGPLEACYGELGQSRMYFNASGP	61.7232	X;X;X;X;X;X;X;X;X;X;X;X;X;X;X;Phospho (STY);X;X;X;X;X;X;X;X;X;X;X;X;X;X;X	XXXXXXXXPPPPPPPPPPPPPPPXXXXXXXX	SGPLEACY(1)GELGQSR	S(-77.24)GPLEACY(61.72)GELGQS(-61.72)R
0	-0.0977811	0.385583	0.109748	0.109082	Y	3	1	0.00011468	107.57	58.78	P62917	40	P62917	P62917	60S ribosomal protein L8	RPL8	GAARLRAVDFAERHGYIKGIVKDIIHDPGRG	107.574	X;X;X;X;X;X;X;X;X;X;X;X;X;X;X;Phospho (STY);X;X;X;X;X;X;X;X;X;X;X;X;X;X;X	XXXXXXXXXXXXXPPPPPPPPPXXXXXXXXX	HGY(1)IKGIVK	HGY(107.57)IKGIVK
0	0.118286	0.110148	0.0814132	0.107324	Y	4	0.999998	9.84e-06	112.42	90.873	P46776	52	P46776	P46776	60S ribosomal protein L27a	RPL27A	GLHHHRINFDKYHPGYFGKVGMKHYHLKRNQ	58.1472	X;X;X;X;X;X;X;X;X;X;X;X;X;X;X;Phospho (STY);X;X;X;X;X;X;X;X;X;X;X;X;X;X;X	XXXXXXPPPPPPPPPPPPPXXXXXXXXXXXX	INFDKYHPGY(1)FGK	INFDKY(-58.15)HPGY(58.15)FGK		yes
0	-0.103575	-0.528234	0.00133537	0.1051	Y	4	0.890187	5.42e-05	89.923	83.807	Q8N8Z6	600	Q8N8Z6	Q8N8Z6	Discoidin, CUB and LCCL domain-containing protein 1	DCBLD1	GRHEYALPLAPPEPEYATPIVERHVLRAHTF	9.08826	X;X;X;X;Phospho (STY);X;X;X;X;X;X;X;X;X;X;Phospho (STY);X;X;X;X;X;X;X;X;X;X;X;X;X;Phospho (STY);X	PPPPPPPPPPPPPPPPPPPPPPPXXXXXXXX	AGRHEY(1)ALPLAPPEPEY(0.89)AT(0.11)PIVER	AGRHEY(59.45)ALPLAPPEPEY(9.09)AT(-9.09)PIVER
0	-0.0597618	-0.288552	0.238779	0.104247	Y	3	1	1.62e-05	111.27	84.011	Q6NZI2-3;Q6NZI2-2;Q6NZI2	116;218;308	Q6NZI2-3	Q6NZI2-3	Polymerase I and transcript release factor	PTRF	SRDKLRKSFTPDHVVYARSKTAVYKVPPFTF	81.8689	X;X;X;X;X;X;X;X;X;X;X;X;X;X;X;Phospho (STY);X;X;X;X;X;X;X;X;X;X;X;X;X;X;X	XXXXXXXPPPPPPPPPPPXXXXXXXXXXXXX	SFTPDHVVY(1)AR	S(-90.4)FT(-81.87)PDHVVY(81.87)AR
0	0.141218	0.0668789	0.17012	0.104017	Y	3	1	6.73e-18	210.95	188.38	P26599;P26599-2;P26599-3	127;127;127	P26599	P26599	Polypyrimidine tract-binding protein 1	PTBP1	NYYTSVTPVLRGQPIYIQFSNHKELKTDSSP	120.962	X;X;X;X;X;X;X;X;X;X;X;X;X;X;X;Phospho (STY);X;X;X;X;X;X;X;X;X;X;X;X;X;X;X	XXXXXXXXXXXPPPPPPPPPPPPXXXXXXXX	GQPIY(1)IQFSNHK	GQPIY(120.96)IQFS(-120.96)NHK
0	-0.058279	-0.0839535	-0.17	0.100642	Y	2	0.998679	0.00104221	110.67	46.108	O75815-3;O75815	121;212	O75815-3	O75815-3	Breast cancer anti-estrogen resistance protein 3	BCAR3	QHFKINRTVLRLSEAYSRVQYQFEMESFDSI	28.7845	X;X;X;X;X;X;X;X;X;X;X;X;X;X;X;Phospho (STY);X;X;X;X;X;X;X;X;X;X;X;X;X;X;X	XXXXXXXXXXXPPPPPPPXXXXXXXXXXXXX	LSEAY(0.999)S(0.001)R	LS(-81.32)EAY(28.78)S(-28.78)R
0	0.186562	0.107497	-0.0195599	0.0964861	Y	3	1	0.000497805	109.7	32.33	P28290-2;P28290-3;P28290	579;732;732	P28290-2	P28290-2	Sperm-specific antigen 2	SSFA2	SKDLLKQRYLFAKAGYPLRRSQSLPTTLLSP	109.704	X;X;X;X;X;X;X;X;X;X;X;X;X;X;X;Phospho (STY);X;X;X;X;X;X;X;X;X;X;X;X;X;X;X	XXXXXXXXXXXXXPPPPPPPXXXXXXXXXXX	AGY(1)PLRR	AGY(109.7)PLRR
0	-0.0316203	-0.0536667	-0.0645422	0.090567	Y	3	1	0.012886	64.776	10.251	P20936-3;P20936-2;P20936-4;P20936;Q9ULH1;Q9ULH1-2	480;303;313;480;330;333	P20936-3	P20936-3	Ras GTPase-activating protein 1;Arf-GAP with SH3 domain, ANK repeat and PH domain-containing protein 1	RASA1;ASAP1	RKTKDAFYKNIVKKGYLLKKGKGKRWKNLYF	64.7764	X;X;X;X;X;X;X;X;X;X;X;X;X;X;X;Phospho (STY);X;X;X;X;X;X;X;X;X;X;X;X;X;X;X	XXXXXXXXXXXXXPPPPPPXXXXXXXXXXXX	KGY(1)LLK	KGY(64.78)LLK
0	0.108934	0.277602	-0.0167171	0.0900794	Y	2	0.999666	0.0244269	64.841	38.901	P29597	604	P29597	P29597	Non-receptor tyrosine-protein kinase TYK2	TYK2	ITQLSHLGQGTRTNVYEGRLRVEGSGDPEEG	34.7652	X;X;X;X;X;X;X;X;X;X;X;X;X;X;X;Phospho (STY);X;X;X;X;X;X;X;X;X;X;X;X;X;X;X	XXXXXXXXXXXXPPPPPPPXXXXXXXXXXXX	TNVY(1)EGR	T(-34.77)NVY(34.77)EGR
0	0.116964	0.0447784	0.222403	0.089848	Y	3	0.964536	2.18e-06	128.22	113.79	Q00839-2;Q00839	247;266	Q00839-2	Q00839-2	Heterogeneous nuclear ribonucleoprotein U	HNRNPU	EDHGRGYFEYIEENKYSRAKSPQPPVEEEDE	14.466	X;X;X;X;X;X;X;X;X;X;X;X;X;X;X;Phospho (STY);X;X;X;X;X;X;X;X;X;X;X;X;X;X;X	XXXXXPPPPPPPPPPPPPXXXXXXXXXXXXX	GYFEY(0.001)IEENKY(0.965)S(0.034)R	GY(-63.85)FEY(-29.97)IEENKY(14.47)S(-14.47)R
0	0.167626	0.124894	0.123282	0.0891539	Y	3	0.898859	0.00563743	71.501	56.822	O96000-2;O96000	56;56	O96000-2	O96000-2	NADH dehydrogenase [ubiquinone] 1 beta subcomplex subunit 10	NDUFB10	LVREFIERQHAKNRYYYYHRQYRRVPDITEC	9.53885	X;X;X;X;X;X;X;X;X;X;X;X;X;X;X;Phospho (STY);X;X;X;X;X;X;X;X;X;X;X;X;X;X;X	XXXXXXXXXXXXPPPPPPPPXXXXXXXXXXX	NRY(0.1)Y(0.899)Y(0.001)YHR	NRY(-9.54)Y(9.54)Y(-28.9)Y(-45.12)HR
0	-0.205708	-0.373758	-0.0374944	0.0891397	Y	3	0.999969	1.8e-05	109.72	90.163	Q8WWY3;Q8WWY3-3;Q8WWY3-2;Q8WWY3-4	205;125;205;205	Q8WWY3	Q8WWY3	U4/U6 small nuclear ribonucleoprotein Prp31	PRPF31	ACDMALELNASKHRIYEYVESRMSFIAPNLS	45.0812	X;X;X;X;X;X;X;X;X;X;X;X;X;X;X;Phospho (STY);X;X;X;X;X;X;X;X;X;X;X;X;X;X;X	XXXXXXXXXXXXPPPPPPPPPPXXXXXXXXX	HRIY(1)EYVESR	HRIY(45.08)EY(-45.08)VES(-69.57)R
0	-0.021376	0.158933	-0.178197	0.0888099	Y	2	0.900834	0.000853224	86.189	46.252	Q9NYF8-3;Q9NYF8-2;Q9NYF8;Q9NYF8-4	78;78;80;80	Q9NYF8-3;Q9NYF8-4	Q9NYF8-3	Bcl-2-associated transcription factor 1	BCLAF1	RGMRRPYGYRGRGRGYYQGGGGRYHRGGYRP	9.58282	X;X;X;X;X;X;X;X;X;X;X;X;X;X;X;Phospho (STY);X;X;X;X;X;X;X;X;X;X;X;X;Phospho (STY);X;X	XXXXXXXXXXXXPPPPPPPPPPPXXXXXXXX	GY(0.901)Y(0.099)QGGGGR	GY(9.58)Y(-9.58)QGGGGR
0	-0.0738658	-0.323588	0.0354701	0.0872502	Y	3	1	1.29e-19	203.99	183.4	P15880	133	P15880	P15880	40S ribosomal protein S2	RPS2	AGQRTRFKAFVAIGDYNGHVGLGVKCSKEVA	203.989	X;X;X;X;X;X;X;X;X;X;X;X;X;X;X;Phospho (STY);X;X;X;X;X;X;X;X;X;X;X;X;X;X;X	XXXXXXXXPPPPPPPPPPPPPPPPPXXXXXX	AFVAIGDY(1)NGHVGLGVK	AFVAIGDY(203.99)NGHVGLGVK		yes
0	-0.245553	-0.0510094	-0.286541	0.0861869	Y	3	1	0.00272219	83.614	20.9	P46940	759	P46940	P46940	Ras GTPase-activating-like protein IQGAP1	IQGAP1	ANEGLITRLQARCRGYLVRQEFRSRMNFLKK	83.6143	X;X;X;X;X;X;X;X;X;X;X;X;X;X;X;Phospho (STY);X;X;X;X;X;X;X;X;X;X;X;X;X;X;X	XXXXXXXXXXXXPPPPPPPXXXXXXXXXXXX	CRGY(1)LVR	CRGY(83.61)LVR		yes
0	0.143774	-0.0546518	0.172631	0.0853025	Y	2	0.998909	1.68e-08	157.78	130.3	Q9H5H4	331	Q9H5H4	Q9H5H4	Zinc finger protein 768	ZNF768	PYKCPRCGKAFADSSYLLRHQRTHSGQKPYK	29.7427	X;X;X;X;X;X;X;X;X;X;X;X;X;X;X;Phospho (STY);X;X;X;X;X;X;X;X;X;X;X;X;X;X;X	XXXXXXXXXPPPPPPPPPPXXXXXXXXXXXX	AFADSS(0.001)Y(0.999)LLR	AFADS(-45.07)S(-29.74)Y(29.74)LLR
0	-0.0777835	0.0964592	0.0275143	0.0843227	Y	3	0.996919	2.61e-09	155.57	100.53	P07947;P06241-3;P06241-2;P06241;P09769	194;185;185;185;180	P07947	P07947	Tyrosine-protein kinase Yes;Tyrosine-protein kinase Fyn;Tyrosine-protein kinase Fgr	YES1;FYN;FGR	RGIFLVRESETTKGAYSLSIRDWDEIRGDNV	25.1035	X;X;X;X;X;X;X;X;X;X;X;X;X;X;X;Phospho (STY);X;X;X;X;X;X;X;X;X;X;X;X;X;X;X	XXXXXXXPPPPPPPPPPPPPPPPPPPPPPPP	ESETTKGAY(0.997)S(0.003)LSIR	ES(-83.79)ET(-70.71)T(-56.98)KGAY(25.1)S(-25.1)LS(-65.19)IR		yes
0	0.137289	0.334966	0.0670297	0.0766286	Y	3	0.972319	0.00329288	73.841	56.61	Q9NUR3	220	Q9NUR3	Q9NUR3	Transmembrane protein 74B	TMEM74B	YRRRTFVPGKGSRKTYGSINLRMRQLNGDGG	17.2089	X;X;X;X;X;X;X;X;X;X;X;X;X;X;X;Phospho (STY);X;X;X;X;X;X;X;X;X;X;X;X;X;X;X	XXXXXXXXXXXXXPPPPPPPPPXXXXXXXXX	KT(0.009)Y(0.972)GS(0.018)INLR	KT(-20.24)Y(17.21)GS(-17.21)INLR
0	-0.0988368	0.0516992	0.107196	0.0764492	Y	3	1	0.0100025	63.662	48.022	P35579-2;P35579;P35580;P35580-5;P35580-2;P35580-3;P35580-4	882;1460;1467;1476;1483;1488;1498	P35579-2	P35579-2	Myosin-9;Myosin-10	MYH9;MYH10	KFDQLLAEEKTISAKYAEERDRAEAEAREKE	63.6623	X;X;X;X;X;X;X;X;X;X;X;X;X;X;X;Phospho (STY);X;X;X;X;X;X;X;X;X;X;X;X;X;X;X	XXXXXXXXXXXXXXXPPPPPPPPPPPPPXXX	Y(1)AEERDRAEAEAR	Y(63.66)AEERDRAEAEAR
0	-0.197117	-0.249941	0.00508065	0.075987	Y	3	1	6.61e-06	123.51	81.177	P55039	37	P55039	P55039	Developmentally-regulated GTP-binding protein 2	DRG2	ATEYHLGLLKAKLAKYRAQLLEPSKSASSKG	112.869	X;X;X;X;X;X;X;X;X;X;X;X;X;X;X;Phospho (STY);X;X;X;X;X;X;X;X;X;X;X;X;X;X;X	XXXXXXXXXXXXXXXPPPPPPPPPPXXXXXX	Y(1)RAQLLEPSK	Y(112.87)RAQLLEPS(-112.87)K
0	-0.000287592	-0.310506	0.0375004	0.0747117	Y	2	1	0.000408203	126.38	122.98	Q9H910-2;Q9H910;Q9H910-3	174;190;218	Q9H910-2	Q9H910-2	Hematological and neurological expressed 1-like protein	HN1L	NKVLNPPGGKSSISFY_______________	80.4942	X;X;X;X;X;X;X;X;X;X;X;X;X;X;X;Phospho (STY);X;X;X;X;X;X;X;X;X;X;X;X;X;X;X	XXXXXXXXXXPPPPPPXXXXXXXXXXXXXXX	SSISFY(1)	S(-112.38)S(-112.38)IS(-80.49)FY(80.49)		yes
0	0.0470498	0.164682	0.0898606	0.0744506	Y	2	0.95628	3.66e-06	125.22	83.597	P19174;P19174-2	702;702	P19174	P19174	1-phosphatidylinositol 4,5-bisphosphate phosphodiesterase gamma-1	PLCG1	RDGAFLVRKRNEPNSYAISFRAEGKIKHCRV	13.3997	X;X;X;X;X;X;X;X;X;X;X;X;X;X;X;Phospho (STY);X;X;X;X;X;X;X;X;X;X;X;X;X;X;X	XXXXXXXXPPPPPPPPPPPPPXXXXXXXXXX	NEPNS(0.044)Y(0.956)AISFR	NEPNS(-13.4)Y(13.4)AIS(-52.04)FR		yes
0	-0.0449716	-0.125223	-0.084978	0.0717653	Y	3	1	3.16e-13	168.93	147.87	P48047	35	P48047	P48047	ATP synthase subunit O, mitochondrial	ATP5O	VVRPFAKLVRPPVQVYGIEGRYATALYSAAS	168.927	X;X;X;X;X;X;X;X;X;X;X;X;X;X;X;Phospho (STY);X;X;X;X;X;X;X;X;X;X;X;X;X;X;X	XXXXXXXPPPPPPPPPPPPPPXXXXXXXXXX	LVRPPVQVY(1)GIEGR	LVRPPVQVY(168.93)GIEGR
0	-0.0568131	-0.0162408	0.0784173	0.071491	Y	3	0.976228	1.92e-27	227.63	217.36	P29317	594	P29317	P29317	Ephrin type-A receptor 2	EPHA2	SEQLKPLKTYVDPHTYEDPNQAVLKFTTEIH	16.1348	X;X;X;X;X;X;X;X;X;X;X;X;X;X;X;Phospho (STY);X;X;X;X;X;X;X;X;X;X;X;X;X;X;X	XXXXXXXXPPPPPPPPPPPPPPPPPXXXXXX	TYVDPHT(0.024)Y(0.976)EDPNQAVLK	T(-88.82)Y(-90.46)VDPHT(-16.13)Y(16.13)EDPNQAVLK		yes
0	0.459514	0.170225	-0.020153	0.0708611	Y	2	0.999994	1.95e-05	137.5	133.91	P62805	99	P62805	P62805	Histone H4	HIST1H4A	AMDVVYALKRQGRTLYGFGG___________	52.1986	X;Oxidation (M);X;X;X;Phospho (STY);X;X;X;X;X;X;X;X;X;Phospho (STY);X;X;X;X;X;X;X;X;X;X;X;X;X;X;X	XXXXXXXXXXXXXPPPPPPPXXXXXXXXXXX	TLY(1)GFGG	T(-52.2)LY(52.2)GFGG
0	0.0505106	0.308237	0.267604	0.0696725	Y	3	1	0.00510921	87.582	39.408	Q99623-2;Q99623	210;248	Q99623-2	Q99623-2	Prohibitin-2	PHB2	AAVEAKQVALSKNPGYIKLRKIRAAQNISKT	87.5817	X;X;X;X;X;X;X;X;X;X;X;X;X;X;X;Phospho (STY);X;X;X;X;X;X;X;X;X;X;X;X;X;X;X	XXXXXXXXXXXXPPPPPPXXXXXXXXXXXXX	NPGY(1)IK	NPGY(87.58)IK
0	0.136101	0.0480537	0.385595	0.0673842	Y	3	1	2.26e-06	150.05	119.44	Q9HAU0-5;Q9HAU0-8;Q9HAU0;Q9HAU0-2;Q9HAU0-4;Q9HAU0-6;Q9HAU0-3	590;482;590;590;590;596;590	Q9HAU0-5	Q9HAU0-5	Pleckstrin homology domain-containing family A member 5	PLEKHA5	VTIDRRHRAHHPKHVYVPDRRSVPAGLTLQS	150.054	X;X;X;X;X;X;X;X;X;X;X;X;X;X;X;Phospho (STY);X;X;X;X;X;X;X;X;X;X;X;X;X;X;X	XXXXXXXXXXXXXPPPPPPPPXXXXXXXXXX	HVY(1)VPDRR	HVY(150.05)VPDRR		yes
0	0.234838	-0.195234	-0.351015	0.065545	Y	3	0.957083	0.0190851	58.246	27.682	O00571-2;O00571;O15523-2;O15523;O15523-3	184;200;195;198;198	O00571-2	O00571-2	ATP-dependent RNA helicase DDX3X;ATP-dependent RNA helicase DDX3Y	DDX3X;DDX3Y	VEMGEIIMGNIELTRYTRPTPVQKHAIPIIK	14.5955	X;X;X;X;X;X;X;X;X;X;X;X;X;X;X;Phospho (STY);X;X;X;X;X;X;X;X;X;X;X;X;X;X;X	XXXXXXXXXXXXXXXPPPPPPPPPXXXXXXX	Y(0.957)T(0.033)RPT(0.01)PVQK	Y(14.6)T(-14.6)RPT(-19.94)PVQK
0	0.00447869	0.169854	-0.108929	0.0651984	Y	3	0.999023	0.000263033	98.508	77.262	O00116	645	O00116	O00116	Alkyldihydroxyacetonephosphate synthase, peroxisomal	AGPS	SISDVGFGMLKSVKEYVDPNNIFGNRNLL__	30.0952	X;X;X;X;X;X;X;X;X;X;X;X;X;X;X;Phospho (STY);X;X;X;X;X;X;X;X;X;X;X;X;X;X;X	XXXXXXXXXXXPPPPPPPPPPPPPPPXXXXX	S(0.001)VKEY(0.999)VDPNNIFGNR	S(-30.1)VKEY(30.1)VDPNNIFGNR
0	-0.138339	0.0332419	-0.193051	0.0641851	Y	3	1	0.000438552	118.89	92.723	O95415	57	O95415	O95415	Brain protein I3	BRI3	YPYLVTGIPTHHPRVYNIHSRTVTRYPANSI	69.3675	X;X;X;X;X;X;X;X;X;X;X;X;X;X;X;Phospho (STY);X;X;X;X;X;X;X;X;X;X;X;X;X;X;X	XXXXXXXXXXXXXXPPPPPPPXXXXXXXXXX	VY(1)NIHSR	VY(69.37)NIHS(-69.37)R
0	-0.147826	0.0543173	0.00912831	0.0641665	Y	4	0.999622	2.75e-13	176.28	154.51	P07355;A6NMY6;P07355-2	24;24;42	P07355	P07355	Annexin A2;Putative annexin A2-like protein	ANXA2;ANXA2P2	CKLSLEGDHSTPPSAYGSVKAYTNFDAERDA	34.2439	X;X;X;X;X;X;X;X;X;X;X;X;X;X;X;Phospho (STY);X;X;X;X;X;Phospho (STY);X;X;X;X;X;X;X;X;X	XXPPPPPPPPPPPPPPPPPPXXXXXXXXXXX	LSLEGDHSTPPSAY(1)GSVK	LS(-92.69)LEGDHS(-72.5)T(-66)PPS(-57.73)AY(34.24)GS(-34.24)VK		yes
0	-0.0825152	0.131909	0.173929	0.0612057	Y	3	1	2.39e-11	183.33	154.38	Q7L7X3	610	Q7L7X3	Q7L7X3	Serine/threonine-protein kinase TAO1	TAOK1	FQAEEEANLLRRQRQYLELECRRFKRRMLLG	54.2593	X;X;X;X;X;X;X;X;X;X;X;X;X;X;X;Phospho (STY);X;X;X;X;X;X;X;X;X;X;X;X;X;X;X	XXXXXXXXXXXXPPPPPPPPPPPXXXXXXXX	QRQY(1)LELECRR	QRQY(54.26)LELECRR		yes
0	-0.197199	0.0776898	-0.263995	0.0601678	Y	2	0.997266	0.0349674	58.23	15.631	O14737;O14737-2	80;80	O14737	O14737	Programmed cell death protein 5	PDCD5	EKTKAVENYLIQMARYGQLSEKVSEQGLIEI	25.62	X;X;X;X;X;X;X;X;X;X;X;X;X;X;X;Phospho (STY);X;X;X;X;X;X;X;X;X;X;X;X;X;X;X	XXXXXXXXXXXXXXXPPPPPPPXXXXXXXXX	Y(0.997)GQLS(0.003)EK	Y(25.62)GQLS(-25.62)EK		yes
0	0.0297175	-0.414855	-0.0237901	0.0600431	Y	2	0.999988	0.00969643	80.555	48.442	Q9BSJ8;Q9BSJ8-2	677;687	Q9BSJ8	Q9BSJ8	Extended synaptotagmin-1	ESYT1	KDRFLGGLVKGKSDPYVKLKLAGRSFRSHVV	49.326	X;X;X;X;X;X;X;X;X;X;X;X;X;X;X;Phospho (STY);X;X;X;X;X;X;X;X;X;X;X;X;X;X;X	XXXXXXXXXXXXPPPPPPXXXXXXXXXXXXX	SDPY(1)VK	S(-49.33)DPY(49.33)VK		yes
0	-0.109523	0.0399091	-0.0798078	0.0578656	Y	3	0.998556	1.25e-10	160.72	98.089	Q12929;Q12929-2	602;342	Q12929	Q12929	Epidermal growth factor receptor kinase substrate 8	EPS8	IVRPPESGLGRADPPYTHTIQKQRMEYGPRP	28.3993	X;X;X;X;X;X;X;X;X;X;X;X;X;X;X;Phospho (STY);X;X;X;X;X;X;X;X;X;X;X;X;X;X;X	XXXXXXXXXXXPPPPPPPPPPPXXXXXXXXX	ADPPY(0.999)T(0.001)HTIQK	ADPPY(28.4)T(-28.4)HT(-84.9)IQK
0	-0.0569076	-0.118301	-0.297887	0.0574557	Y	3	0.999913	0.0221324	54.023	40.088	P40925-2;P40925;P40925-3	30;119;137	P40925-2	P40925-2	Malate dehydrogenase, cytoplasmic	MDH1	ANVKIFKSQGAALDKYAKKSVKVIVVGNPAN	40.5889	X;X;X;X;X;X;X;X;X;X;X;X;X;X;X;Phospho (STY);X;X;X;X;X;X;X;X;X;X;X;X;X;X;X	XXXXXXXPPPPPPPPPPPXXXXXXXXXXXXX	SQGAALDKY(1)AK	S(-40.59)QGAALDKY(40.59)AK		yes
0	-0.497642	0.308427	0.130781	0.0574009	Y	3	0.99978	8.44e-06	122.34	108.26	P15529-16;P15529-7;P15529-4;P15529-6;P15529-3;P15529-5;P15529-2	324;343;357;358;372;373;387	P15529-16	P15529-16			RKKKGKADGGAEYATYQTKSTTPAEQRG___	36.8226	X;X;X;X;X;X;X;X;X;X;X;X;X;X;X;Phospho (STY);X;X;X;X;X;X;X;X;X;X;X;X;X;X;X	XXXXXXPPPPPPPPPPPPPXXXXXXXXXXXX	ADGGAEYATY(1)QTK	ADGGAEY(-82.61)AT(-49.26)Y(36.82)QT(-36.82)K
0	-0.146859	-0.177021	-0.0805474	0.0550569	Y	3	1	2.86e-05	113.46	93.318	P35241-4;P26038;P35241;P15311;P35241-5	134;270;270;270;270	P35241-4	P35241-4	Radixin;Moesin;Ezrin	RDX;MSN;EZR	FVIKPIDKKAPDFVFYAPRLRINKRILALCM	93.7657	X;X;X;X;X;X;X;X;X;X;X;X;X;X;X;Phospho (STY);X;X;X;X;X;X;X;X;X;X;X;X;X;X;X	XXXXXXXXPPPPPPPPPPPXXXXXXXXXXXX	KAPDFVFY(1)APR	KAPDFVFY(93.77)APR		yes
0	0.207358	0.181429	-0.237964	0.0520415	Y	2	0.998196	0.00085671	100.98	66.811	Q96BH1	432	Q96BH1	Q96BH1	E3 ubiquitin-protein ligase RNF25	RNF25	CVRWERSKGRTPGSSYPRLPRGQGAYRPGTR	28.5499	X;X;X;X;X;X;X;X;X;X;X;X;X;X;X;Phospho (STY);X;X;X;X;X;X;X;X;X;X;X;X;X;X;X	XXXXXXXXXXPPPPPPPPXXXXXXXXXXXXX	TPGSS(0.001)Y(0.998)PR	T(-65.69)PGS(-33.87)S(-28.55)Y(28.55)PR
0	0.0572015	-0.115082	0.208008	0.05064	Y	3	0.978665	3.11e-06	138.22	85.964	Q8IZL9-2;Q8IZL9-3;Q8IZL9-5;Q8IZL9-4;Q8IZL9	160;160;160;173;160	Q8IZL9-2	Q8IZL9-2	Cyclin-dependent kinase 20	CDK20	DFGLARVFSPDGSRLYTHQVATRSSLSCRTT	16.6154	X;X;X;X;X;X;X;X;X;X;X;X;X;X;X;Phospho (STY);X;X;X;X;X;X;X;X;X;X;X;X;X;X;X	XXXXXXPPPPPPPPPPPPPPPPPXXXXXXXX	LY(0.979)T(0.021)HQVATR	LY(16.62)T(-16.62)HQVAT(-130.61)R
0	-0.0697845	0.0396718	-0.163636	0.0501906	Y	4	1	1.03e-13	179.46	151.29	O75976-2;O75976	1097;1344	O75976-2	O75976-2	Carboxypeptidase D	CPD	RHKDGFHRLRQHHDEYEDEIRMMSTGSKKSL	179.459	X;X;X;X;X;X;X;X;X;X;X;X;X;X;X;Phospho (STY);X;X;X;X;X;X;X;X;X;X;X;X;X;X;X	XXXXXXXXPPPPPPPPPPPPPXXXXXXXXXX	LRQHHDEY(1)EDEIR	LRQHHDEY(179.46)EDEIR
0	-0.164667	-0.104521	-0.0222275	0.0493959	Y	3	1	0.000478236	102.71	63.922	P47914	98	P47914	P47914	60S ribosomal protein L29	RPL29	PKIPKGVSRKLDRLAYIAHPKLGKRARARIA	102.714	X;X;X;X;X;X;X;X;X;X;X;X;X;X;X;Phospho (STY);X;X;X;X;X;X;X;X;X;X;X;X;X;X;X	XXXXXXXXXXXXXPPPPPPPPXXXXXXXXXX	LAY(1)IAHPK	LAY(102.71)IAHPK
0	0.074648	-0.0467556	-0.226141	0.0472497	Y	2	1	0.000707794	111.01	70.904	Q86V81	139	Q86V81	Q86V81	THO complex subunit 4	ALYREF	ELFAEFGTLKKAAVHYDRSGRSLGTADVHFE	92.4704	X;X;X;X;X;X;X;X;X;X;X;X;X;X;X;Phospho (STY);X;X;X;X;X;X;X;X;X;X;X;X;X;X;X	XXXXXXXXXXXPPPPPPPXXXXXXXXXXXXX	AAVHY(1)DR	AAVHY(92.47)DR
0	-0.0588487	-0.0379089	0.108177	0.0471239	Y	2	1	0.0057372	92.692	36.182	Q9NW13-2;Q9NW13	300;441	Q9NW13-2	Q9NW13-2	RNA-binding protein 28	RBM28	LQTTKVKKPTGTRNLYLAREGLIRAGTKAAE	92.6925	X;X;X;X;X;X;X;X;X;X;X;X;X;X;X;Phospho (STY);X;X;X;X;X;X;X;X;X;X;X;X;X;X;X	XXXXXXXXXXXXXPPPPPPXXXXXXXXXXXX	NLY(1)LAR	NLY(92.69)LAR
0	0.0977496	0.0510701	0.061473	0.0469219	Y	4	0.999885	4.59e-09	151.22	120.65	O00571-2;O00571;O15523-2;O15523;O15523-3	250;266;261;264;264	O00571-2	O00571-2	ATP-dependent RNA helicase DDX3X;ATP-dependent RNA helicase DDX3Y	DDX3X;DDX3Y	LRAMKENGRYGRRKQYPISLVLAPTRELAVQ	39.3918	X;X;X;X;X;X;X;X;X;Phospho (STY);X;X;X;X;X;Phospho (STY);X;X;X;X;X;X;X;X;X;X;X;X;X;X;X	XXXXXXXXXXXXPPPPPPPPPPPPPPXXXXX	RKQY(1)PISLVLAPTR	RKQY(39.39)PIS(-39.39)LVLAPT(-121.9)R
0	-1.00545	-0.203201	-0.572501	0.0458487	Y	2	0.995697	2.98e-06	124.86	100.01	P53778-2;P53778	175;185	P53778-2	P53778-2	Mitogen-activated protein kinase 12	MAPK12	LDFGLARQADSEMTGYVVTRWYRAPEVILNW	23.6559	X;X;X;X;X;X;X;X;X;X;X;X;Oxidation (M);X;X;Phospho (STY);X;X;X;X;X;X;X;X;X;X;X;X;X;X;X	XXXXXXXPPPPPPPPPPPPPXXXXXXXXXXX	QADSEMT(0.004)GY(0.996)VVTR	QADS(-55.51)EMT(-23.66)GY(23.66)VVT(-50.27)R
0	-0.012095	0.347199	0.262008	0.0458027	Y	3	1	2.86e-13	172.33	132.18	Q92794	437	Q92794	Q92794	Histone acetyltransferase KAT6A	KAT6A	DGRKARGEVVDYSEQYRIRKRGNRKSSTSDW	88.0364	X;X;X;X;X;X;X;X;X;X;X;X;X;X;X;Phospho (STY);X;X;X;X;X;X;X;X;X;X;X;X;X;X;X	XXXXXXPPPPPPPPPPPPPXXXXXXXXXXXX	GEVVDYSEQY(1)RIR	GEVVDY(-102.99)S(-88.04)EQY(88.04)RIR
0	-0.075846	-0.0436288	-0.423378	0.0457954	Y	3	1	0.0282045	54.525	35.84	Q9ULV4;Q9ULV4-2;Q9ULV4-3	394;400;447	Q9ULV4	Q9ULV4	Coronin-1C	CORO1C	EGKNADPILISLKHGYIPGKNRDLKVVKKNI	54.5252	X;X;X;X;X;X;X;X;X;X;X;X;X;X;X;Phospho (STY);X;X;X;X;X;X;X;X;X;X;X;X;X;X;X	XXXXXXXXXXXXXPPPPPPPXXXXXXXXXXX	HGY(1)IPGK	HGY(54.53)IPGK
0	-0.268826	-0.0208236	-0.232268	0.0377123	Y	3	0.999783	1.13e-28	232.82	211.95	Q14126	968	Q14126	Q14126	Desmoglein-2	DSG2	LGPSQPQSLIVTERVYAPASTLVDQPYANEG	36.7174	X;X;X;X;X;X;X;X;X;X;X;X;X;X;X;Phospho (STY);X;X;X;X;X;X;X;X;X;X;X;X;X;X;X	XXXXXXXXXXXXXXPPPPPPPPPPPPPPPPP	VY(1)APASTLVDQPYANEGTVVVTER	VY(36.72)APAS(-36.72)T(-53.65)LVDQPY(-189.13)ANEGT(-211.28)VVVT(-220.31)ER		yes
0	0.242964	0.126438	-0.176522	0.0371379	Y	2	1	0.0128757	71.067	37.375	Q08211	902	Q08211	Q08211	ATP-dependent RNA helicase A	DHX9	TCFPEPFINEGKRLGYIHRNFAGNRFSDHVA	61.0056	X;X;X;X;X;X;X;X;X;X;X;X;X;X;X;Phospho (STY);X;X;X;X;X;X;X;X;X;X;X;X;X;X;X	XXXXXXXXXXXXXPPPPPPXXXXXXXXXXXX	LGY(1)IHR	LGY(61.01)IHR
0	-0.0726651	-0.100669	-0.0536441	0.0358084	Y	3	0.997923	4.13e-06	127.87	81.024	Q00537-2;Q00537	203;203	Q00537-2	Q00537-2	Cyclin-dependent kinase 17	CDK17	KMETYIKLEKLGEGTYATVYKGRSKLTENLV	27.4574	X;X;X;X;X;X;X;X;X;X;X;X;X;X;Phospho (STY);Phospho (STY);X;X;X;X;X;X;X;X;X;X;X;X;X;X;X	XXXXXXXPPPPPPPPPPPPPPPPXXXXXXXX	LGEGT(0.002)Y(0.998)ATVYK	LGEGT(-27.46)Y(27.46)AT(-35.58)VY(-50.77)K
0	0.0148898	0.142053	0.200257	0.0333452	Y	2	0.872589	1.34e-05	130.41	110.63	Q14315-2;Q14315	2592;2625	Q14315-2	Q14315-2	Filamin-C	FLNC	LVETVTKSSSSRGSSYSSIPKFSSDASKVVT	8.67963	X;X;X;X;X;X;X;X;X;X;X;X;X;X;X;Phospho (STY);X;X;X;X;X;X;X;X;X;X;X;X;X;X;X	XXXXXXXXXXXXPPPPPPPPPXXXXXXXXXX	GSS(0.007)Y(0.873)S(0.118)S(0.002)IPK	GS(-49.66)S(-20.75)Y(8.68)S(-8.68)S(-26.87)IPK
0	0.126487	0.262078	0.0875865	0.0332261	Y	3	0.992195	1.01e-05	106.58	83.46	Q9HAT8	151	Q9HAT8	Q9HAT8	E3 ubiquitin-protein ligase pellino homolog 2	PELI2	ISRFACRIVCDRNEPYTARIFAAGFDSSKNI	21.0421	X;X;X;X;X;X;X;X;X;X;X;X;X;X;X;Phospho (STY);X;X;X;X;X;X;X;X;X;X;X;X;X;X;X	XXXXXXXPPPPPPPPPPPPXXXXXXXXXXXX	IVCDRNEPY(0.992)T(0.008)AR	IVCDRNEPY(21.04)T(-21.04)AR
0	-0.0569239	-0.128341	-0.017986	0.0293959	Y	3	1	5.4e-09	153.7	127.58	Q02487	853	Q02487	Q02487	Desmocollin-2	DSC2	VYLCNQDENHKHAQDYVLTYNYEGRGSVAGS	89.4573	X;X;X;X;X;X;X;X;X;X;X;X;X;X;X;Phospho (STY);X;X;X;X;X;X;X;X;X;X;X;X;X;X;X	XXXXXXXXXXXPPPPPPPPPPPPPPXXXXXX	HAQDY(1)VLTYNYEGR	HAQDY(89.46)VLT(-89.46)Y(-109.26)NY(-125.93)EGR
0	0.101643	0.112231	0.0737362	0.0289503	Y	3	1	0.000129471	104.44	69.081	Q9NYF8-3;Q9NYF8-2;Q9NYF8;Q9NYF8-4	91;91;93;93	Q9NYF8-3;Q9NYF8-4	Q9NYF8-3	Bcl-2-associated transcription factor 1	BCLAF1	RGYYQGGGGRYHRGGYRPVWNRRHSRSPRRG	104.437	X;X;Phospho (STY);X;X;X;X;X;X;X;X;X;X;X;X;Phospho (STY);X;X;X;X;X;X;X;X;X;X;X;X;X;X;X	XXXXXXXXXXXXXPPPPPPPPPXXXXXXXXX	GGY(1)RPVWNR	GGY(104.44)RPVWNR
0	-0.162229	0.265768	-0.031551	0.0275642	Y	3	1	0.00395883	92.692	56.105	P61326;Q96A72	51;53	P61326	P61326	Protein mago nashi homolog;Protein mago nashi homolog 2	MAGOH;MAGOHB	NNSNYKNDVMIRKEAYVHKSVMEELKRIIDD	92.6925	X;X;X;X;X;X;X;X;X;X;X;X;X;X;X;Phospho (STY);X;X;X;X;X;X;X;X;X;X;X;X;X;X;X	XXXXXXXXXXXXXPPPPPPXXXXXXXXXXXX	EAY(1)VHK	EAY(92.69)VHK
0	0.0423002	0.113498	0.331697	0.0273628	Y	2	0.99999	2.4e-24	225.09	194.6	P08670	61	P08670	P08670	Vimentin	VIM	PSTSRSLYASSPGGVYATRSSAVRLRSSVPG	49.794	X;X;X;X;X;X;X;X;X;X;X;X;X;X;X;Phospho (STY);X;X;X;X;X;X;X;X;X;X;X;X;X;X;X	XXXXXPPPPPPPPPPPPPPXXXXXXXXXXXX	SLYASSPGGVY(1)ATR	S(-168.66)LY(-139.18)AS(-113.26)S(-74.87)PGGVY(49.79)AT(-49.79)R
0	0.108195	0.0568803	-0.16868	0.026027	Y	2	1	0.0041376	97.596	28.207	P36578	331	P36578	P36578	60S ribosomal protein L4	RPL4	KNPLKNLRIMLKLNPYAKTMRRNTILRQARN	97.5963	X;X;X;X;X;X;X;X;X;X;X;X;X;X;X;Phospho (STY);X;X;X;X;X;X;X;X;X;X;X;X;X;X;X	XXXXXXXXXXXXPPPPPPXXXXXXXXXXXXX	LNPY(1)AK	LNPY(97.6)AK
0	0.101528	-0.260268	0.0718956	0.0251418	Y	3	0.995832	2.25e-05	115.63	108.57	Q9C0B5-2;Q9C0B5	577;630	Q9C0B5-2	Q9C0B5-2	Palmitoyltransferase ZDHHC5	ZDHHC5	RGRGVGSPEPGPTAPYLGRSMSYSSQKAQPG	23.7829	X;X;X;X;X;X;X;X;X;X;X;X;X;X;X;Phospho (STY);X;X;X;X;X;X;X;X;X;X;X;X;X;X;X	XXXPPPPPPPPPPPPPPPPXXXXXXXXXXXX	GVGSPEPGPT(0.004)APY(0.996)LGR	GVGS(-93.17)PEPGPT(-23.78)APY(23.78)LGR
0	-0.452169	-0.00886223	-0.300994	0.0251005	Y	3	0.999831	1.34e-09	155.43	128.72	O15264-2;O15264	182;182	O15264-2	O15264-2	Mitogen-activated protein kinase 13	MAPK13	LDFGLARHADAEMTGYVVTRWYRAPEVILSW	39.8938	X;X;X;X;X;X;X;X;X;X;X;X;Oxidation (M);X;X;Phospho (STY);X;X;X;X;X;X;X;X;X;X;X;X;X;X;X	XXXXXXXPPPPPPPPPPPPPXXXXXXXXXXX	HADAEMTGY(1)VVTR	HADAEMT(-41.74)GY(39.89)VVT(-39.89)R
0	0.0371151	0.131993	-0.040856	0.0243996	Y	3	1	1.56e-05	130.56	87.496	Q15393	693	Q15393	Q15393	Splicing factor 3B subunit 3	SF3B3	VLDPVTGDLSDTRTRYLGSRPVKLFRVRMQG	66.2973	X;X;X;X;X;X;X;X;X;X;X;X;X;X;X;Phospho (STY);X;X;X;X;X;X;X;X;X;X;X;X;X;X;X	XXXXXXXXXXXXXXXPPPPPPPPXXXXXXXX	Y(1)LGSRPVK	Y(66.3)LGS(-66.3)RPVK
0	-0.186052	-0.115468	-0.239096	0.0195698	Y	3	1	2.63e-19	186.94	163.58	O00571-2;O00571;O15523-2;O15523	285;301;296;299	O00571-2	O00571-2	ATP-dependent RNA helicase DDX3X;ATP-dependent RNA helicase DDX3Y	DDX3X;DDX3Y	ARKFSYRSRVRPCVVYGGADIGQQIRDLERG	186.94	X;X;X;X;X;X;X;X;X;X;X;X;X;X;X;Phospho (STY);X;X;X;X;X;X;X;X;X;X;X;X;X;X;X	XXXXXXXXXPPPPPPPPPPPPPPPPPXXXXX	VRPCVVY(1)GGADIGQQIR	VRPCVVY(186.94)GGADIGQQIR
0	-0.0631205	-0.121327	-0.00461549	0.0174959	Y	3	1	9.06e-09	136.5	102.62	O94776-2;O94776	310;483	O94776-2	O94776-2	Metastasis-associated protein MTA2	MTA2	MCRDLLQPRRAARRPYAPINANAIKAECSIR	136.5	X;X;X;X;X;X;X;X;X;X;X;X;X;X;X;Phospho (STY);X;X;X;X;X;X;X;X;X;X;X;X;X;X;X	XXXXXXXXXXXXXPPPPPPPPPPPPXXXXXX	RPY(1)APINANAIK	RPY(136.5)APINANAIK
0	0.019241	-0.0846454	-0.183197	0.0159116	Y	3	0.962919	7.62e-06	124.29	97.514	P24752	170	P24752	P24752	Acetyl-CoA acetyltransferase, mitochondrial	ACAT1	SMSNVPYVMNRGSTPYGGVKLEDLIVKDGLT	14.1631	X;X;X;X;X;X;X;X;X;X;X;X;X;X;X;Phospho (STY);X;X;X;X;X;X;X;X;X;X;X;X;X;X;X	XXXXXXXXXXXPPPPPPPPPPPPPPPPXXXX	GST(0.037)PY(0.963)GGVKLEDLIVK	GS(-37.8)T(-14.16)PY(14.16)GGVKLEDLIVK
0	0.0398989	0.0221253	0.0977331	0.0153552	Y	3	1	7.07e-08	141.37	102.35	P20700	138	P20700	P20700	Lamin-B1	LMNB1	KKESDLNGAQIKLREYEAALNSKDAALATAL	109.892	X;X;X;X;X;X;X;X;X;X;X;X;X;X;X;Phospho (STY);X;X;X;X;X;X;X;X;X;X;X;X;X;X;X	XXXXXXXXXXXXPPPPPPPPPPPXXXXXXXX	LREY(1)EAALNSK	LREY(109.89)EAALNS(-109.89)K
0	-0.404942	-0.189447	-0.145611	0.0128678	Y	3	0.999999	1.86e-19	193.11	172.99	Q16881-7;Q16881-5;Q16881-2;Q16881-4;Q16881-3;Q16881-6;Q16881	93;131;175;183;230;246;281	Q16881-7	Q16881-7	Thioredoxin reductase 1, cytoplasmic	TXNRD1	YRVALREKKVVYENAYGQFIGPHRIKATNNK	59.9543	X;X;X;X;X;X;X;X;X;X;X;X;X;X;X;Phospho (STY);X;X;X;X;X;X;X;X;X;X;X;X;X;X;X	XXXXXXXXPPPPPPPPPPPPPPPPXXXXXXX	VVYENAY(1)GQFIGPHR	VVY(-59.95)ENAY(59.95)GQFIGPHR
0	-0.174554	-0.136978	-0.179254	0.00735575	Y	4	1	3.13e-14	184.22	143.95	Q8NBF2-2;Q8NBF2	44;403	Q8NBF2-2	Q8NBF2-2	NHL repeat-containing protein 2	NHLRC2	LRFAGSGNEENRNNAYPHKAGFAQPSGLSLA	161.397	X;X;X;X;X;X;X;X;X;X;X;X;X;X;X;Phospho (STY);X;X;X;X;X;X;X;X;X;X;X;X;X;X;X	XXPPPPPPPPPPPPPPPPPXXXXXXXXXXXX	FAGSGNEENRNNAY(1)PHK	FAGS(-161.4)GNEENRNNAY(161.4)PHK
0	0.317621	0.164653	0.0870887	0.00361514	Y	3	0.998393	4.61e-06	122.7	102.18	P50914	14	P50914	P50914	60S ribosomal protein L14	RPL14	__MVFRRFVEVGRVAYVSFGPHAGKLVAIVD	27.932	X;X;X;X;X;X;X;X;X;X;X;X;X;X;X;Phospho (STY);X;X;X;X;X;X;X;X;X;X;X;X;X;X;X	XXXXXXXXXXXXXPPPPPPPPPPPPXXXXXX	VAY(0.998)VS(0.002)FGPHAGK	VAY(27.93)VS(-27.93)FGPHAGK		yes
0	0.154083	-0.0666719	0.18684	0.00109249	Y	3	0.999973	1.65e-05	104.22	82.849	P09661	137	P09661	P09661	U2 small nuclear ribonucleoprotein A'	SNRPA1	RNPVTNKKHYRLYVIYKVPQVRVLDFQKVKL	45.6294	X;X;X;X;X;X;X;X;X;X;X;X;X;X;X;Phospho (STY);X;X;X;X;X;X;X;X;X;X;X;X;X;X;X	XXXXXXXXXXXPPPPPPPPPPPXXXXXXXXX	LYVIY(1)KVPQVR	LY(-45.63)VIY(45.63)KVPQVR
0	0.12757	0.373572	0.0854359	0	Y	3	1	1.99e-31	257.02	227.28	P98172	313	P98172	P98172	Ephrin-B1	EFNB1	EPSDIIIPLRTTENNYCPHYEKVSGDYGHPV	99.4635	X;X;X;X;X;X;X;X;X;X;X;X;X;X;X;Phospho (STY);X;X;X;X;X;X;X;X;X;X;X;X;X;X;X	XXXXXXXXXXPPPPPPPPPPPPXXXXXXXXX	TTENNY(1)CPHYEK	T(-151.37)T(-139.82)ENNY(99.46)CPHY(-99.46)EK
0	0.0226095	0.0211191	-0.0836644	-0.000625014	Y	3	1	7.94e-19	210.79	106.55	P06493;P06493-2	19;19	P06493	P06493	Cyclin-dependent kinase 1	CDK1	YTKIEKIGEGTYGVVYKGRHKTTGQVVAMKK	93.5893	X;X;X;X;X;X;X;X;X;X;Phospho (STY);Phospho (STY);X;X;X;Phospho (STY);X;X;X;X;X;X;X;X;X;X;X;X;X;X;X	XXXXXXPPPPPPPPPPPPPXXXXXXXXXXXX	IGEGTYGVVY(1)KGR	IGEGT(-106.91)Y(-93.59)GVVY(93.59)KGR
0	0.0152068	0.0147444	-0.0140137	-0.00191551	Y	4	0.989059	0.00110335	78.377	43.99	P52565;P52565-2	133;133	P52565	P52565	Rho GDP-dissociation inhibitor 1	ARHGDIA	VNREIVSGMKYIQHTYRKGVKIDKTDYMVGS	19.5616	X;X;X;X;X;X;X;X;X;X;X;X;X;X;X;Phospho (STY);X;X;X;X;X;X;X;X;X;X;X;X;X;X;X	XXXXXXXXXXPPPPPPPPXXXXXXXXXXXXX	YIQHT(0.011)Y(0.989)RK	Y(-64.24)IQHT(-19.56)Y(19.56)RK		yes
0	-0.0107314	0.0677671	-0.0656362	-0.00256854	Y	3	0.995449	3.37e-13	161.21	140.43	Q08345-2;Q08345-6;Q08345;Q08345-5	759;777;796;802	Q08345-2	Q08345-2	Epithelial discoidin domain-containing receptor 1	DDR1	KIADFGMSRNLYAGDYYRVQGRAVLPIRWMA	23.3987	X;X;X;X;X;X;X;X;X;X;X;Phospho (STY);X;X;X;Phospho (STY);X;X;X;X;X;X;X;X;X;X;X;X;X;X;X	XXXXXXXXXPPPPPPPPPPPPPXXXXXXXXX	NLY(1)AGDY(0.995)Y(0.005)RVQGR	NLY(85.29)AGDY(23.4)Y(-23.4)RVQGR
0	0.0488034	0.149688	-0.0786034	-0.00613254	Y	3	0.999999	0.000743187	88.338	71.126	P62191	25	P62191	P62191	26S protease regulatory subunit 4	PSMC1	GPGGGKKDDKDKKKKYEPPVPTRVGKKKKKT	60.9098	X;X;X;X;X;X;X;X;X;X;X;X;X;X;X;Phospho (STY);X;X;X;X;X;X;X;X;X;X;X;X;X;X;X	XXXXXXXXXXXXXPPPPPPPPPPXXXXXXXX	KKY(1)EPPVPTR	KKY(60.91)EPPVPT(-60.91)R
0	-0.131279	-0.138068	-0.0673973	-0.00656426	Y	3	0.997923	4.13e-06	127.87	81.024	Q00536;Q00536-3;Q00536-2	176;182;250	Q00536	Q00536	Cyclin-dependent kinase 16	CDK16	KLETYIKLDKLGEGTYATVYKGKSKLTDNLV	27.4574	X;X;X;X;X;X;X;X;X;X;X;X;X;X;Phospho (STY);Phospho (STY);X;X;X;X;X;X;X;X;X;X;X;X;X;X;X	XXXXXXXPPPPPPPPPPPPPPXXXXXXXXXX	LGEGT(0.002)Y(0.998)ATVYK	LGEGT(-27.46)Y(27.46)AT(-35.58)VY(-50.77)K
0	0.392201	0.0950837	0.0273986	-0.00704813	Y	2	0.999821	5.47e-06	133.81	94.185	P08670	276	P08670	P08670	Vimentin	VIM	SKPDLTAALRDVRQQYESVAAKNLQEAEEWY	37.4656	X;X;X;X;X;X;X;X;X;X;X;X;X;X;X;Phospho (STY);X;X;X;X;X;X;X;X;X;X;X;X;X;X;X	XXXXXXXXXXXXXPPPPPPPPPXXXXXXXXX	QQY(1)ESVAAK	QQY(37.47)ES(-37.47)VAAK
0	-0.121844	0.18821	0.149674	-0.00742763	Y	3	1	0.000377469	106.2	88.959	Q15424-2;Q15424;Q15424-4;Q15424-3	711;780;779;780	Q15424-2	Q15424-2	Scaffold attachment factor B1	SAFB	REGSRSMMGEREGQHYPERHGGPERHGRDSR	95.5698	X;X;X;X;X;X;X;X;X;X;X;X;X;X;X;Phospho (STY);X;X;X;X;X;X;X;X;X;X;X;X;X;X;X	XXXXXXXXXXXPPPPPPPPPPPPPPXXXXXX	EGQHY(1)PERHGGPER	EGQHY(95.57)PERHGGPER
0	-0.00988841	-0.291261	0.188019	-0.00853127	Y	3	0.999468	2.22e-13	176.87	163.86	Q8TF74	74	Q8TF74	Q8TF74	WAS/WASL-interacting protein family member 2	WIPF2	RSAPILEKPKGSSGGYGSGGAALQPKGGLFQ	35.3368	X;X;X;X;X;X;X;X;X;X;X;X;X;X;X;Phospho (STY);X;X;X;X;X;X;X;X;X;X;X;X;X;X;X	XXXXXXXXXXPPPPPPPPPPPPPPPPXXXXX	GSSGGY(0.999)GSGGAALQPK	GS(-43.91)S(-35.34)GGY(35.34)GS(-37.01)GGAALQPK
0	-0.0507107	0.173854	-0.0123578	-0.00899577	Y	2	0.978739	1e-05	119.39	96.268	O43491;O43491-2;O43491-3;O43491-4	88;88;88;88	O43491	O43491	Band 4.1-like protein 2	EPB41L2	GISRFIPPWLKKQKSYTLVVAKDGGDKKEPT	16.9924	X;X;X;X;X;X;X;X;X;X;X;X;X;X;X;Phospho (STY);X;X;X;X;X;X;X;X;X;X;X;X;X;X;X	XXXXXXXXXXXXPPPPPPPPPPXXXXXXXXX	S(0.02)Y(0.979)T(0.002)LVVAK	S(-16.99)Y(16.99)T(-27.61)LVVAK		yes
0	0.0714293	-0.332972	0.102214	-0.0104507	Y	2	0.890117	0.000371321	102.51	75.384	P84103-2;P84103	33;33	P84103-2	P84103-2	Serine/arginine-rich splicing factor 3	SRSF3	GNNGNKTELERAFGYYGPLRSVWVARNPPGF	9.08515	X;X;X;X;X;X;X;X;X;X;X;X;X;X;X;Phospho (STY);X;X;X;X;X;X;X;X;X;X;X;X;X;X;X	XXXXXXXXXXXPPPPPPPPPXXXXXXXXXXX	AFGY(0.11)Y(0.89)GPLR	AFGY(-9.09)Y(9.09)GPLR
0	0.217947	0.205509	-0.029359	-0.0127253	Y	3	1	0.000536066	106.76	58.519	Q96JP5-2;Q96JP5	76;76	Q96JP5-2	Q96JP5-2	E3 ubiquitin-protein ligase ZFP91	ZFP91	AAAAAAAVSRRRKAEYPRRRRSSPSARPPDV	43.7692	X;X;X;X;X;X;X;X;X;X;X;X;X;X;X;Phospho (STY);X;X;X;X;X;X;X;X;X;X;X;X;X;X;X	XXXXXXXXXXXPPPPPPPPXXXXXXXXXXXX	RKAEY(1)PR	RKAEY(43.77)PR
0	0.00945097	0.0523601	-0.115193	-0.0129572	Y	3	0.999999	9.95e-08	142.39	68.063	P24941;P24941-2;Q00526	19;19;19	P24941	P24941	Cyclin-dependent kinase 2;Cyclin-dependent kinase 3	CDK2;CDK3	FQKVEKIGEGTYGVVYKARNKLTGEVVALKK	60.0654	X;X;X;X;X;X;X;X;X;X;Phospho (STY);Phospho (STY);X;X;X;Phospho (STY);X;X;X;X;X;X;X;X;X;X;X;X;X;X;X	XXXXXXPPPPPPPPPPPPPXXXXXXXXXXXX	IGEGTYGVVY(1)KAR	IGEGT(-74.93)Y(-60.07)GVVY(60.07)KAR
0	0.10798	0.281824	-0.167697	-0.0167302	Y	2	0.990093	0.00168054	101.21	29.834	Q12802-4;Q12802;Q12802-2	1733;1751;1755	Q12802-4	Q12802-4	A-kinase anchor protein 13	AKAP13	DSEWKSGTKVSRTFSYIKNKMSSSKKSKEKE	20.021	X;X;X;X;X;X;X;X;X;X;X;X;X;X;X;Phospho (STY);X;X;X;X;X;X;X;X;X;X;X;X;X;X;X	XXXXXXXXXXXXPPPPPPPPXXXXXXXXXXX	TFS(0.01)Y(0.99)IK	T(-42.62)FS(-20.02)Y(20.02)IK
0	-0.109122	0.109098	0.320183	-0.0206153	Y	3	1	0.0046403	71.98	58.826	P43378	333	P43378	P43378	Tyrosine-protein phosphatase non-receptor type 9	PTPN9	TFHCSMSPGNLEKNRYGDVPCLDQTRVKLTK	67.2582	X;X;X;X;X;X;X;X;X;X;X;X;X;X;X;Phospho (STY);X;X;X;X;X;X;X;X;X;X;X;X;X;X;X	XXXXXXXXXXXXXPPPPPPPPPPPPPXXXXX	NRY(1)GDVPCLDQTR	NRY(67.26)GDVPCLDQT(-67.26)R		yes
0	-0.357149	-0.181463	-0.0103863	-0.0220446	Y	3	0.806412	1.51e-05	115.34	103.42	Q9NX63	177	Q9NX63	Q9NX63	Coiled-coil-helix-coiled-coil-helix domain-containing protein 3, mitochondrial	CHCHD3	QYQKAAEEVEAKFKRYESHPVCADLQAKILQ	6.19679	X;X;X;X;X;X;X;X;X;X;X;X;X;X;X;Phospho (STY);X;X;X;X;X;X;X;X;X;X;X;X;X;X;X	XXXXXXXXXXXXXXXPPPPPPPPPPPPPXXX	Y(0.806)ES(0.194)HPVCADLQAK	Y(6.2)ES(-6.2)HPVCADLQAK
0	0.149458	0.18867	0.305175	-0.0223358	Y	3	1	2.02e-19	193.19	179.19	Q9H792	531	Q9H792	Q9H792	Pseudopodium-enriched atypical kinase 1	PEAK1	PGQISAHFQKSSAIRYQEVWTSSTSPRQKIP	72.1602	X;X;X;X;X;X;X;X;X;X;X;X;X;X;X;Phospho (STY);X;X;X;X;X;X;X;X;X;X;X;X;X;X;X	XXXXXXXXXXPPPPPPPPPPPPPPPPPXXXX	SSAIRY(1)QEVWTSSTSPR	S(-78.63)S(-72.16)AIRY(72.16)QEVWT(-106.82)S(-126.38)S(-132.06)T(-137.64)S(-149.82)PR
0	0.296565	-0.0269946	-0.348655	-0.0223407	Y	3	0.960658	2.82e-05	110.15	103.96	O43155	647	O43155	O43155	Leucine-rich repeat transmembrane protein FLRT2	FLRT2	GGINYTDCHIPNNMRYCNSSVPDLEHCHT__	13.9205	X;X;X;X;X;X;X;X;X;X;X;X;X;X;X;Phospho (STY);X;X;X;X;X;X;X;X;X;X;X;X;X;X;X	XXXXXXXXXXXXXXXPPPPPPPPPPPPPPXX	Y(0.961)CNS(0.039)SVPDLEHCHT	Y(13.92)CNS(-13.92)S(-33.91)VPDLEHCHT(-103.91)
0	-0.0703239	-0.0725306	0.0769598	-0.0248203	Y	2	1	0.00013153	130.16	67.27	Q13470-2;Q13470	656;661	Q13470-2	Q13470-2	Non-receptor tyrosine-protein kinase TNK1	TNK1	RILEHYQWDLSAASRYVLARP__________	130.159	X;X;X;X;X;X;X;X;X;X;X;X;X;X;X;Phospho (STY);X;X;X;X;X;X;X;X;X;X;X;X;X;X;X	XXXXXXXXXXXXXXXPPPPPPXXXXXXXXXX	Y(1)VLARP	Y(130.16)VLARP
0	0.0824708	0.0569719	0.207453	-0.0256505	Y	2	1	0.0227679	64.827	44.686	Q15118;Q15118-2	49;49	Q15118	Q15118	[Pyruvate dehydrogenase [lipoamide]] kinase isozyme 1, mitochondrial	PDK1	SSPASERGVPGQVDFYARFSPSPLSMKQFLD	64.8267	X;X;X;X;X;X;X;X;X;X;X;X;X;X;X;Phospho (STY);X;X;X;X;X;X;X;X;X;X;X;X;X;X;X	XXXXXXXPPPPPPPPPPPXXXXXXXXXXXXX	GVPGQVDFY(1)AR	GVPGQVDFY(64.83)AR
0	0.108124	-0.0362785	-0.133569	-0.0292805	Y	3	0.993089	3.36e-08	132.65	121.53	O95235-2;O95235	851;869	O95235-2	O95235-2	Kinesin-like protein KIF20A	KIF20A	LPRTPTCQSSTDCSPYARILRSRRSPLLKSG	21.5744	X;X;X;X;X;X;X;X;X;X;X;X;X;X;X;Phospho (STY);X;X;X;X;X;X;X;X;X;X;X;X;X;X;X	XXXPPPPPPPPPPPPPPPXXXXXXXXXXXXX	TPTCQSSTDCS(0.007)PY(0.993)AR	T(-124.82)PT(-124.82)CQS(-105.87)S(-91.11)T(-67.27)DCS(-21.57)PY(21.57)AR
0	0.356656	0.0627087	-0.181571	-0.0311303	Y	3	0.997017	1.91e-05	119.96	105.17	Q9BY89	1032	Q9BY89	Q9BY89	Uncharacterized protein KIAA1671	KIAA1671	QGSPVEPKATFFAVTYQIPNTQKAKGVVLSG	25.2464	X;X;X;X;X;X;X;X;X;X;X;X;X;X;X;Phospho (STY);X;X;X;X;X;X;X;X;X;X;X;X;X;X;X	XXXXXXXXPPPPPPPPPPPPPPPXXXXXXXX	ATFFAVT(0.003)Y(0.997)QIPNTQK	AT(-53.75)FFAVT(-25.25)Y(25.25)QIPNT(-85.53)QK
0	0.0221753	-0.0219818	0.0182365	-0.0327616	Y	3	0.999998	2.02e-08	133.48	106.48	Q9NRU3	856	Q9NRU3	Q9NRU3	Metal transporter CNNM1	CNNM1	PCSRSDGLRSPSEVVYLRMEELAFTQEEMTD	56.7232	X;X;X;X;X;X;X;X;X;X;X;X;X;X;X;Phospho (STY);X;X;X;X;X;X;X;X;X;X;X;X;X;X;X	XXXXPPPPPPPPPPPPPPXXXXXXXXXXXXX	SDGLRSPSEVVY(1)LR	S(-115.16)DGLRS(-86.45)PS(-56.72)EVVY(56.72)LR
0	0.122121	-0.103157	0.195742	-0.0334177	Y	2	0.994649	5.59e-05	125.7	86.697	Q9Y624-2;Q9Y624	231;280	Q9Y624-2	Q9Y624-2	Junctional adhesion molecule A	F11R	HFDRTKKGTSSKKVIYSQPSARSEGEFKQTS	22.6925	X;X;X;X;X;X;X;X;X;X;X;X;X;X;X;Phospho (STY);X;X;X;X;X;X;X;X;X;X;X;X;X;X;X	XXXXXXXXXXXXPPPPPPPPPPXXXXXXXXX	VIY(0.995)S(0.005)QPSAR	VIY(22.69)S(-22.69)QPS(-62.62)AR
0	-0.218332	0.06065	-0.482945	-0.0361923	Y	2	1	4.61e-09	159.83	99.921	P07900;P07900-2;Q14568;P08238;Q58FF8	284;406;283;276;198	P07900;P08238	P07900	Heat shock protein HSP 90-alpha;Putative heat shock protein HSP 90-alpha A2;Heat shock protein HSP 90-beta;Putative heat shock protein HSP 90-beta 2	HSP90AA1;HSP90AA2;HSP90AB1;HSP90AB2P	KKDGDKKKKKKIKEKYIDQEELNKTKPIWTR;SGKDKKKKTKKIKEKYIDQEELNKTKPIWTR	159.829	X;X;X;X;X;X;X;X;X;X;X;X;X;X;X;Phospho (STY);X;X;X;X;X;X;X;X;X;X;X;X;X;X;X	XXXXXXXXXXXXXXXPPPPPPPPPXXXXXXX	Y(1)IDQEELNK	Y(159.83)IDQEELNK		yes
0	0.0022158	0.0812514	-0.0473416	-0.0367197	Y	2	0.994243	0.000445226	122.74	30.836	Q5VTE0;P68104;P68104-2	177;177;156	Q5VTE0	Q5VTE0	Putative elongation factor 1-alpha-like 3;Elongation factor 1-alpha 1	EEF1A1P5;EEF1A1	YSQKRYEEIVKEVSTYIKKIGYNPDTVAFVP	22.554	X;X;X;X;X;X;X;X;X;X;X;X;X;X;X;Phospho (STY);X;X;X;X;X;X;X;X;X;X;X;X;X;X;X	XXXXXXXXXXXPPPPPPPPXXXXXXXXXXXX	EVST(0.006)Y(0.994)IK	EVS(-36.27)T(-22.55)Y(22.55)IK
0	0.148957	-0.355905	0.0509087	-0.0379779	Y	2	1	0.0078921	86.086	35.547	P55795;P31943;Q9NQA5	82;82;647	P55795	P55795	Heterogeneous nuclear ribonucleoprotein H2;Heterogeneous nuclear ribonucleoprotein H2, N-terminally processed;Heterogeneous nuclear ribonucleoprotein H;Heterogeneous nuclear ribonucleoprotein H, N-terminally processed;Transient receptor potential cation channel subfamily V member 5	HNRNPH2;HNRNPH1;TRPV5	VKLALKKDRETMGHRYVEVFKSNSVEMDWVL	86.0864	X;X;X;X;X;X;X;X;X;X;X;X;X;X;X;Phospho (STY);X;X;X;X;X;X;X;X;X;X;X;X;X;X;X	XXXXXXXXXXXXXXXPPPPPPXXXXXXXXXX	Y(1)VEVFK	Y(86.09)VEVFK
0	-0.0716766	-0.165794	-0.0108587	-0.0382042	Y	2	0.941111	0.000529005	121.05	82.257	P04075;P09972;P04075-2	204;204;258	P04075	P04075	Fructose-bisphosphate aldolase A;Fructose-bisphosphate aldolase C	ALDOA;ALDOC	PEILPDGDHDLKRCQYVTEKVLAAVYKALSD	12.0361	X;X;X;X;X;X;X;X;X;X;X;X;X;X;X;Phospho (STY);X;X;X;X;X;X;X;X;X;X;X;X;X;X;X	XXXXXXXXXXXXXPPPPPPPXXXXXXXXXXX	CQY(0.941)VT(0.059)EK	CQY(12.04)VT(-12.04)EK
0	-0.222736	-0.0363734	0.0718132	-0.0391077	Y	2	0.862914	0.0260296	62.464	16.176	Q15849-2;Q15849	376;899	Q15849-2	Q15849-2	Urea transporter 2	SLC14A2	LPLSKVTYPEANRIYYLSQERNRRASIITKY	8.00793	X;X;X;X;X;X;X;X;X;X;X;X;X;X;X;Phospho (STY);X;X;X;X;X;X;X;X;X;X;X;X;X;X;X	XXXXXXXXXXXXXPPPPPPPPXXXXXXXXXX	IY(0.001)Y(0.863)LS(0.137)QER	IY(-31.78)Y(8.01)LS(-8.01)QER
0	-0.254802	-0.0484173	-0.392617	-0.0402048	Y	2	0.99996	7.22e-18	211.77	172.99	O75128-6;O75128-3;O75128;O75128-7;O75128-2	409;867;867;924;949	O75128-6	O75128-6	Protein cordon-bleu	COBL	TEVTFLKPQRRTSSQYVASAIAKRIGAPKVH	44.0446	X;X;X;X;X;X;X;X;X;X;X;X;X;X;X;Phospho (STY);X;X;X;X;X;X;X;X;X;X;X;X;X;X;X	XXXXXXXXXXPPPPPPPPPPPPPPXXXXXXX	TSSQY(1)VASAIAK	T(-100.66)S(-90.54)S(-44.04)QY(44.04)VAS(-69.66)AIAK
0	-0.711014	-0.989896	-1.6856	-0.0412665	Y	3	0.986779	0.0311544	54.259	36.44	Q5T8I3-2;Q5T8I3	219;219	Q5T8I3-2	Q5T8I3-2	Protein FAM102B	FAM102B	SRTSSYASQQSKVSGYSTCHSRSSSFSELCH	21.9299	X;X;X;X;X;X;X;X;X;X;X;X;X;X;X;Phospho (STY);X;X;X;X;X;X;X;X;X;X;X;X;X;X;X	XXXXXXXXXXXXPPPPPPPPPPXXXXXXXXX	VS(0.005)GY(0.987)S(0.006)T(0.002)CHSR	VS(-22.66)GY(21.93)S(-21.93)T(-28.14)CHS(-44.6)R
0	-0.100834	0.163006	-0.253523	-0.0460023	Y	3	0.840922	0.00129637	77.533	65.95	P08559-3;P08559;P08559-2;P08559-4	211;242;249;280	P08559-3	P08559-3	Pyruvate dehydrogenase E1 component subunit alpha, somatic form, mitochondrial	PDHA1	YGMGTSVERAAASTDYYKRGDFIPGLRVDGM	8.87629	X;X;X;X;X;X;X;X;X;X;X;X;X;X;X;Phospho (STY);X;X;X;X;X;X;X;X;X;X;X;X;X;X;X	XXXXXXXXXPPPPPPPPPPXXXXXXXXXXXX	AAAS(0.001)T(0.049)DY(0.841)Y(0.109)KR	AAAS(-27.5)T(-12.38)DY(8.88)Y(-8.88)KR
0	0.047984	0.125895	-0.0231393	-0.049925	Y	3	0.960028	0.00381534	74.92	55.133	P46781	13	P46781	P46781	40S ribosomal protein S9	RPS9	___MPVARSWVCRKTYVTPRRPFEKSRLDQE	14.4836	X;X;X;X;X;X;X;X;X;X;X;X;X;X;X;Phospho (STY);X;X;X;X;X;X;X;X;X;X;X;X;X;X;X	XXXXXXXXXXXXXPPPPPPPXXXXXXXXXXX	KT(0.034)Y(0.96)VT(0.006)PR	KT(-14.48)Y(14.48)VT(-22.2)PR
0	-0.0221181	0.149437	0.180985	-0.0509729	Y	3	0.958931	0.00128924	81.017	56.927	P27824-3;P27824;P27824-2	106;214;249	P27824-3	P27824-3	Calnexin	CANX	KLHFIFRHKNPKTGIYEEKHAKRPDADLKTY	13.6827	X;X;X;X;X;X;X;X;X;X;X;X;X;X;X;Phospho (STY);X;X;X;X;X;X;X;X;X;X;X;X;X;X;X	XXXXXXXXXXXXPPPPPPPPPPXXXXXXXXX	T(0.041)GIY(0.959)EEKHAK	T(-13.68)GIY(13.68)EEKHAK		yes
0	0.19748	0.170327	0.145312	-0.0510331	Y	2	0.978569	0.0247158	64.792	28.37	P22626-2;P22626	222;234	P22626-2	P22626-2	Heterogeneous nuclear ribonucleoproteins A2/B1	HNRNPA2B1	FGPGPGSNFRGGSDGYGSGRGFGDGYNGYGG	16.8146	X;X;X;X;X;X;X;X;X;X;X;X;X;X;X;Phospho (STY);X;X;X;X;X;X;X;X;X;X;X;X;X;X;X	XXXXXXXXXXPPPPPPPPPPXXXXXXXXXXX	GGS(0.001)DGY(0.979)GS(0.02)GR	GGS(-29.67)DGY(16.81)GS(-16.81)GR
0	0.0370443	0.119009	0.228116	-0.0514186	Y	3	0.947272	0.0264637	49.448	26.129	Q9BY12-3;Q9BY12-2;Q9BY12	655;922;901	Q9BY12-3	Q9BY12-3	S phase cyclin A-associated protein in the endoplasmic reticulum	SCAPER	YESLMETKNSGSDSPYKAKLQRLAKDLLKQV	13.7707	X;X;X;X;X;X;X;X;X;X;X;X;X;X;X;Phospho (STY);X;X;X;X;X;X;X;X;X;X;X;X;X;X;X	XXXXXXXXPPPPPPPPPPPXXXXXXXXXXXX	NS(0.003)GS(0.01)DS(0.04)PY(0.947)KAK	NS(-24.6)GS(-19.9)DS(-13.77)PY(13.77)KAK
0	-0.168599	-0.512111	-0.221429	-0.0518318	Y	2	0.999948	0.0251103	66.056	53.067	Q99816-2;Q99816	285;390	Q99816-2	Q99816-2	Tumor susceptibility gene 101 protein	TSG101	ALMQKARKTAGLSDLY_______________	42.9113	X;X;X;X;X;X;X;X;X;X;X;X;X;X;X;Phospho (STY);X;X;X;X;X;X;X;X;X;X;X;X;X;X;X	XXXXXXXPPPPPPPPPXXXXXXXXXXXXXXX	KTAGLSDLY(1)	KT(-63.69)AGLS(-42.91)DLY(42.91)		yes
0	-0.077068	0.0461566	-0.100596	-0.0521544	Y	3	0.904719	0.0238822	48.077	41.201	Q8IWW6-3;Q8IWW6-2;Q8IWW6-4;Q8IWW6	243;243;243;243	Q8IWW6-3	Q8IWW6-3	Rho GTPase-activating protein 12	ARHGAP12	RATTPPNQGRPDSPVYANLQELKISQSALPP	9.80986	X;X;X;X;X;X;X;X;X;X;X;X;X;X;X;Phospho (STY);X;X;X;X;X;X;X;X;X;X;X;X;X;X;X	XPPPPPPPPPPPPPPPPPPPPPPXXXXXXXX	ATT(0.001)PPNQGRPDS(0.095)PVY(0.905)ANLQELK	AT(-36.06)T(-32.28)PPNQGRPDS(-9.81)PVY(9.81)ANLQELK
0	0.459314	0.32109	-0.0553411	-0.0522343	Y	3	1	0.0256785	49.358	29.722	P49257	199	P49257	P49257	Protein ERGIC-53	LMAN1	SQALASCQRDFRNKPYPVRAKITYYQNTLTV	49.3585	X;X;X;X;X;X;X;X;X;X;X;X;X;X;X;Phospho (STY);X;X;X;X;X;X;X;X;X;X;X;X;X;X;X	XXXXXXXXXXXXPPPPPPPXXXXXXXXXXXX	NKPY(1)PVR	NKPY(49.36)PVR		yes
0	-0.194427	-0.0661912	-0.138057	-0.0526061	Y	3	1	0.0318035	44.704	36.99	Q9UGI8-2;Q9UGI8	279;288	Q9UGI8-2	Q9UGI8-2	Testin	TES	ELLVDMIYFWKNEKLYCGRHYCDSEKPRCAG	44.7042	X;X;X;X;X;X;X;X;X;X;X;X;X;X;X;Phospho (STY);X;X;X;X;X;X;X;X;X;X;X;X;X;X;X	XXXXXXXXXXXPPPPPPPPXXXXXXXXXXXX	NEKLY(1)CGR	NEKLY(44.7)CGR		yes
0	-0.319516	-0.228836	-0.18243	-0.0550907	Y	4	0.999967	3.58e-36	269	249.32	P49841;P49841-2;P49840	216;216;279	P49841	P49841	Glycogen synthase kinase-3 beta;Glycogen synthase kinase-3 alpha	GSK3B;GSK3A	FGSAKQLVRGEPNVSYICSRYYRAPELIFGA	45.0949	X;X;X;X;X;X;X;X;X;X;X;X;X;X;X;Phospho (STY);X;X;X;X;X;X;X;X;X;X;X;X;X;X;X	XXXXXPPPPPPPPPPPPPPPXXXXXXXXXXX	QLVRGEPNVSY(1)ICSR	QLVRGEPNVS(-45.09)Y(45.09)ICS(-56.93)R		yes
0	-0.0681919	0.0643334	0.00947605	-0.0556565	Y	2	0.999996	0.00132749	86.67	53.778	Q12979-3;Q12979-4;Q12979-2;Q12979;P11274-2;P11274	113;616;625;662;1025;1069	Q12979-3	Q12979-3	Active breakpoint cluster region-related protein;Breakpoint cluster region protein	ABR;BCR	VKISVVTKRERSKVPYIVRQCVEEVEKRGIE	53.7779	X;X;X;X;X;X;X;X;X;X;X;X;X;X;X;Phospho (STY);X;X;X;X;X;X;X;X;X;X;X;X;X;X;X	XXXXXXXXXPPPPPPPPPPXXXXXXXXXXXX	SKVPY(1)IVR	S(-53.78)KVPY(53.78)IVR
0	0.308697	0.000175178	0.206658	-0.0558927	Y	2	0.960388	0.00306297	77.662	52.103	Q07157-2;Q07157	1115;1195	Q07157-2	Q07157-2	Tight junction protein ZO-1	TJP1	SAGPKPAESKQYFEQYSRSYEQVPPQGFTSR	13.8463	X;X;X;X;X;X;X;X;X;X;X;X;X;X;X;Phospho (STY);X;X;X;Phospho (STY);X;X;X;X;X;X;X;X;X;X;X	XXXXXXXXXXPPPPPPPPXXXXXXXXXXXXX	QYFEQY(0.96)S(0.04)R	QY(-59.4)FEQY(13.85)S(-13.85)R
0	-0.202436	-0.0639038	0.384429	-0.0582149	Y	3	0.999679	1.08e-07	109.19	99.239	P43405;P43405-2	323;300	P43405	P43405	Tyrosine-protein kinase SYK	SYK	PAQGNRQESTVSFNPYEPELAPWAADKGPQR	35.0648	X;X;X;X;X;X;X;X;X;X;X;X;X;X;X;Phospho (STY);X;X;X;X;X;X;X;X;X;X;X;X;X;X;X	XXXXXXPPPPPPPPPPPPPPPPPPPPPPPPP	QESTVSFNPY(1)EPELAPWAADKGPQR	QES(-56.15)T(-51.45)VS(-35.06)FNPY(35.06)EPELAPWAADKGPQR
0	-0.0519056	0.0607061	0.091422	-0.0609448	Y	2	0.959306	0.00337838	93.195	16.349	Q16531	193	Q16531	Q16531	DNA damage-binding protein 1	DDB1	ICFVYQDPQGRHVKTYEVSLREKEFNKGPWK	13.7444	X;X;X;X;X;X;X;X;X;X;X;X;X;X;X;Phospho (STY);X;X;X;X;X;X;X;X;X;X;X;X;X;X;X	XXXXXXXXXXXXXXPPPPPPPXXXXXXXXXX	T(0.041)Y(0.959)EVSLR	T(-13.74)Y(13.74)EVS(-37.07)LR
0	0.0155488	-0.220778	-0.00185771	-0.0610884	Y	2	1	0.000701796	119.41	76.492	Q8IYJ3-2;Q8IYJ3;Q9HCH5-4;Q9HCH5-9;Q9HCH5-2;Q9HCH5-15;Q9HCH5-12;Q9HCH5-14;Q9HCH5-6;Q9HCH5;Q9HCH5-13;Q9HCH5-11;Q9HCH5-7;Q9HCH5-8	292;304;70;99;110;486;627;636;644;668;669;966;990;1006	Q8IYJ3-2	Q8IYJ3-2	Synaptotagmin-like protein 1;Synaptotagmin-like protein 2	SYTL1;SYTL2	QCQGLAAARRRRSDPYVKSYLLPDKQSKRKT	79.4696	X;X;X;X;X;X;X;X;X;X;X;X;X;X;X;Phospho (STY);X;X;X;X;X;X;X;X;X;X;X;X;X;X;X	XXXXXXXXXXPPPPPPPPXXXXXXXXXXXXX	RSDPY(1)VK	RS(-79.47)DPY(79.47)VK
0	-0.179628	-0.0210861	-0.384438	-0.0623411	Y	3	1	0.00362384	85.265	37.349	Q9NS23-3;Q9NS23-4;Q9NS23-2;Q9NS23-5;Q9NS23	104;185;255;259;259	Q9NS23-3	Q9NS23-3	Ras association domain-containing protein 1	RASSF1	RKFALFERAERHGQVYLRKLLDDEQPLRLRL	57.1775	X;X;X;X;X;X;X;X;X;X;X;X;X;X;X;Phospho (STY);X;X;X;X;X;X;X;X;X;X;X;X;X;X;X	XXXXXXXXXXXPPPPPPPPXXXXXXXXXXXX	HGQVY(1)LRK	HGQVY(57.18)LRK
0	0.022597	-0.0975905	0.0203746	-0.0627363	Y	2	0.985494	1.88e-07	134.56	104.4	O95985-3;O95985-2;O95985;Q13472-3;Q13472-2;Q13472	336;336;336;267;337;362	O95985-3	O95985-3	DNA topoisomerase 3-beta-1;DNA topoisomerase 3-alpha	TOP3B;TOP3A	AMQTAERLYTQGYISYPRTETTHYPENFDLK	18.3241	X;X;X;X;X;X;X;X;X;X;X;X;X;X;X;Phospho (STY);X;X;X;X;X;X;X;X;X;X;X;X;X;X;X	XXXXXXXPPPPPPPPPPPXXXXXXXXXXXXX	LYTQGYIS(0.014)Y(0.985)PR	LY(-110.49)T(-88.21)QGY(-50.08)IS(-18.32)Y(18.32)PR
0	0.296407	-0.173096	0.150352	-0.064963	Y	3	0.999996	8.31e-06	125.5	112.71	P30291	132	P30291	P30291	Wee1-like protein kinase	WEE1	EGFGSSSPVKSPAAPYFLGSSFSPVRCGGPG	54.4198	X;X;X;X;X;X;X;X;X;X;X;X;X;X;X;Phospho (STY);X;X;X;X;X;X;X;X;X;X;X;X;X;X;X	XXXXXXXXXXPPPPPPPPPPPPPPPPXXXXX	SPAAPY(1)FLGSSFSPVR	S(-54.42)PAAPY(54.42)FLGS(-62.2)S(-69.42)FS(-75.14)PVR
0	-0.23256	-0.102503	-0.255765	-0.0654404	Y	3	1	0.000841718	102.46	55.383	P49591	410	P49591	P49591	Serine--tRNA ligase, cytoplasmic	SARS	CSNCTDYQARRLRIRYGQTKKMMDKVEFVHM	69.8546	X;X;X;X;X;X;X;X;X;X;X;X;X;X;X;Phospho (STY);X;X;X;X;X;X;X;X;X;X;X;X;X;X;X	XXXXXXXXXXXXXPPPPPPPXXXXXXXXXXX	IRY(1)GQTK	IRY(69.85)GQT(-69.85)K		yes
0	0.0169647	0.323119	0.0360233	-0.0659195	Y	3	1	3.05e-06	123.79	102.34	Q8NC56	122	Q8NC56	Q8NC56	LEM domain-containing protein 2	LEMD2	IRPSAASWVGSRGLAYPARPAQLRRRASVRG	67.2143	X;X;X;X;X;X;X;X;X;X;X;X;X;X;X;Phospho (STY);X;X;X;X;X;X;X;X;X;X;X;X;X;X;X	XXXXXXXXXXXXPPPPPPPPPPPPPXXXXXX	GLAY(1)PARPAQLRR	GLAY(67.21)PARPAQLRR		yes
0	0.0459689	-0.159965	-0.066668	-0.0676599	Y	2	0.999999	9.54e-09	164.77	98.345	Q9P2M7-2;Q9P2M7	313;313	Q9P2M7-2	Q9P2M7-2	Cingulin	CGN	EAAPPGSVDHMKATIYGILREGSSESETSVR	61.4206	X;X;X;X;X;X;X;X;X;X;X;X;X;X;X;Phospho (STY);X;X;X;X;X;X;X;X;X;X;X;X;X;X;X	XXXXXXXXXXXXPPPPPPPPXXXXXXXXXXX	ATIY(1)GILR	AT(-61.42)IY(61.42)GILR
0	-0.14148	-0.00355495	0.0237715	-0.0681303	Y	2	0.999016	0.000173024	112.71	71.717	Q16531	718	Q16531	Q16531	DNA damage-binding protein 1	DDB1	TIDEIQKLHIRTVPLYESPRKICYQEVSQCF	30.0659	X;X;X;X;X;X;X;X;X;X;X;X;X;X;X;Phospho (STY);X;X;X;X;X;X;X;X;X;X;X;X;X;X;X	XXXXXXXXXXXPPPPPPPPPXXXXXXXXXXX	TVPLY(0.999)ES(0.001)PR	T(-75.15)VPLY(30.07)ES(-30.07)PR
0	-0.016306	-0.259269	0.14005	-0.0706081	Y	3	0.99911	2.29e-15	186.46	162.79	Q9BSA4-2;Q9BSA4	196;517	Q9BSA4-2	Q9BSA4-2	Protein tweety homolog 2	TTYH2	RASPPPTYSPSMRATYLSVADEHLRHYGNQF	30.9838	X;X;X;X;X;X;X;X;X;X;X;X;X;X;X;Phospho (STY);X;X;X;X;X;X;X;X;X;X;Phospho (STY);X;X;X;X	XXXXXXXXXXXXXPPPPPPPPPPPPXXXXXX	AT(0.001)Y(0.999)LSVADEHLR	AT(-30.98)Y(30.98)LS(-40.3)VADEHLR
0	0.0893347	-0.0204778	-0.203729	-0.0720632	Y	3	0.999819	0.00416308	72.2	62.545	Q99729-3;Q99729-4;Q99729-2;Q99729	285;286;332;332	Q99729-3	Q99729-3	Heterogeneous nuclear ribonucleoprotein A/B	HNRNPAB	GKSQRRGGHQNNYKPY_______________	37.4273	X;X;X;X;X;X;X;X;X;X;X;X;X;X;X;Phospho (STY);X;X;X;X;X;X;X;X;X;X;X;X;X;X;X	XXXXXPPPPPPPPPPPXXXXXXXXXXXXXXX	RGGHQNNYKPY(1)	RGGHQNNY(-37.43)KPY(37.43)
0	-0.121469	0.0237078	-0.08215	-0.0726131	Y	2	1	3.31e-06	143.7	110.15	O75582-2;O75676-2;O75676;O75582	60;44;44;60	O75582-2	O75582-2	Ribosomal protein S6 kinase alpha-5;Ribosomal protein S6 kinase alpha-4	RPS6KA5;RPS6KA4	GIENFELLKVLGTGAYGKVFLVRKISGHDTG	68.6599	X;X;X;X;X;X;X;X;X;X;X;X;X;X;X;Phospho (STY);X;X;X;X;X;X;X;X;X;X;X;X;X;X;X	XXXXXXXXXPPPPPPPPPXXXXXXXXXXXXX	VLGTGAY(1)GK	VLGT(-68.66)GAY(68.66)GK
0	-0.259035	0.172428	-0.399771	-0.0743539	Y	2	0.999697	8.73e-09	159.28	90.786	Q9NR20-5;Q9NR20-2;Q9NR20;Q92630-2;Q92630;Q9NR20-3;Q9NR20-4	264;264;264;309;382;379;388	Q9NR20-5	Q9NR20-5	Dual specificity tyrosine-phosphorylation-regulated kinase 4;Dual specificity tyrosine-phosphorylation-regulated kinase 2	DYRK4;DYRK2	IDFGSSCYEHQKVYTYIQSRFYRSPEVILGH	35.1958	X;X;X;X;X;X;X;X;X;X;X;X;X;X;X;Phospho (STY);X;X;X;X;X;X;X;X;X;X;X;X;X;X;X	XXXXXXXXXXXXPPPPPPPPXXXXXXXXXXX	VYTY(1)IQSR	VY(-60.69)T(-35.2)Y(35.2)IQS(-77.94)R
0	0.192526	0.340102	0.181703	-0.076003	Y	2	1	0.00931773	81.716	40.508	P21333-2;P21333	2563;2571	P21333-2	P21333-2	Filamin-A	FLNA	DASKVVAKGLGLSKAYVGQKSSFTVDCSKAG	81.716	X;X;X;X;X;X;X;X;X;X;X;X;X;X;X;Phospho (STY);X;X;X;X;X;X;X;X;X;X;X;X;X;X;X	XXXXXXXXXXXXXXPPPPPPXXXXXXXXXXX	AY(1)VGQK	AY(81.72)VGQK
0	-0.300313	-0.163431	-0.18489	-0.0791172	Y	2	0.999922	0.010764	77.282	6.37	Q14126	775	Q14126	Q14126	Desmoglein-2	DSG2	AQAAAVALNEEFLRNYFTDKAASYTEEDENH	41.097	X;X;X;X;X;X;X;X;X;X;X;X;X;X;X;Phospho (STY);X;X;X;X;X;X;X;X;X;X;X;X;X;X;X	XXXXXXXXXXXXXXPPPPPPXXXXXXXXXXX	NY(1)FTDK	NY(41.1)FT(-41.1)DK		yes
0	-0.0554494	-0.281711	0.0866918	-0.0815355	Y	3	0.999855	3.25e-05	103.44	72.871	Q86X29-6;Q86X29-5;Q86X29-3;Q86X29-4;Q86X29;Q86X29-2	395;483;531;532;551;493	Q86X29-6	Q86X29-6	Lipolysis-stimulated lipoprotein receptor	LSR	DQDDSRDFPRSRDPHYDDFRSRERPPADPRS	38.3966	X;X;X;X;X;X;X;X;X;X;X;X;X;X;X;Phospho (STY);X;X;X;X;X;X;X;X;X;X;X;X;X;X;X	XXXXXXXXXXPPPPPPPPPPXXXXXXXXXXX	SRDPHY(1)DDFR	S(-38.4)RDPHY(38.4)DDFR		yes
0	-0.171015	-0.0987527	-0.239425	-0.0816271	Y	2	0.999972	4.51e-18	199.95	182.44	Q07912;Q07912-3	827;905	Q07912	Q07912	Activated CDC42 kinase 1	TNK2	GKTMPTTQSFASDPKYATPQVIQAPGPRAGP	45.5442	X;X;X;X;X;X;X;X;X;X;X;X;X;X;X;Phospho (STY);X;X;X;X;X;X;X;X;X;X;X;X;X;X;X	XXXXXXXXXXXXXXXPPPPPPPPPPPPPXXX	Y(1)ATPQVIQAPGPR	Y(45.54)AT(-45.54)PQVIQAPGPR
0	0.0663837	0.122911	0.253283	-0.0852264	Y	3	0.999998	0.00512539	80.229	37.163	P62316-2;P62316	85;95	P62316-2	P62316-2	Small nuclear ribonucleoprotein Sm D2	SNRPD2	SGKGKKKSKPVNKDRYISKMFLRGDSVIVVL	56.2569	X;X;X;X;X;X;X;X;X;X;X;X;X;X;X;Phospho (STY);X;X;X;X;X;X;X;X;X;X;X;X;X;X;X	XXXXXXXXXXXXXPPPPPPXXXXXXXXXXXX	DRY(1)ISK	DRY(56.26)IS(-56.26)K
0	-0.19229	-0.0939933	0.044157	-0.0867082	Y	3	0.999829	3.29e-36	244.36	216.59	Q86UL8-2;Q86UL8	362;362	Q86UL8-2	Q86UL8-2	Membrane-associated guanylate kinase, WW and PDZ domain-containing protein 2	MAGI2	ENELPYGWEKIDDPIYGTYYVDHINRRTQFE	37.6649	X;X;X;X;X;X;X;X;X;X;X;X;X;X;X;Phospho (STY);X;X;X;X;X;X;X;X;X;X;X;X;X;X;X	XXXXXXXXXXPPPPPPPPPPPPPPPPPXXXX	IDDPIY(1)GTYYVDHINRR	IDDPIY(37.66)GT(-37.66)Y(-77.44)Y(-104.14)VDHINRR
0	0.113557	-0.061097	-0.0888828	-0.0870711	Y	3	0.933577	2.49e-05	111.81	97.456	P98179	125	P98179	P98179	Putative RNA-binding protein 3	RBM3	QGYGSGRYYDSRPGGYGYGYGRSRDYNGRNQ	11.6248	X;X;X;X;X;X;X;X;X;X;X;X;X;X;X;Phospho (STY);X;X;X;X;X;X;X;X;X;X;X;X;X;X;X	XXXXXXXPPPPPPPPPPPPPPPXXXXXXXXX	Y(0.001)YDS(0.001)RPGGY(0.934)GY(0.064)GYGR	Y(-32.16)Y(-40.73)DS(-27.95)RPGGY(11.62)GY(-11.62)GY(-41.93)GR
0	0.266674	0.12397	0.00902128	-0.0897082	Y	3	0.939979	0.00192614	101.72	26.874	P61326;Q96A72;P61326-2	10;12;10	P61326	P61326	Protein mago nashi homolog;Protein mago nashi homolog 2	MAGOH;MAGOHB	______MESDFYLRYYVGHKGKFGHEFLEFE	11.9482	X;X;X;X;X;X;X;X;X;X;X;X;X;X;X;Phospho (STY);X;X;X;X;X;X;X;X;X;X;X;X;X;X;X	XXXXXXXXXXXXXXPPPPPPXXXXXXXXXXX	Y(0.06)Y(0.94)VGHK	Y(-11.95)Y(11.95)VGHK
0	-0.371016	-0.426132	0.00539964	-0.0913551	Y	3	0.998799	1.01e-08	143.83	124.16	O00401	256	O00401	O00401	Neural Wiskott-Aldrich syndrome protein	WASL	ISEAQLKDRETSKVIYDFIEKTGGVEAVKNE	29.2794	X;X;X;X;X;X;X;X;X;X;X;X;X;X;X;Phospho (STY);X;X;X;X;X;X;X;X;X;X;X;X;X;X;X	XXXXXXXPPPPPPPPPPPPPPXXXXXXXXXX	DRETS(0.001)KVIY(0.999)DFIEK	DRET(-46.56)S(-29.28)KVIY(29.28)DFIEK
0	0.143431	-0.221199	-0.0452948	-0.0923585	Y	2	1	0.00586534	74.415	64.572	Q9BSA4-2;Q9BSA4	207;528	Q9BSA4-2	Q9BSA4-2	Protein tweety homolog 2	TTYH2	MRATYLSVADEHLRHYGNQFPA_________	74.4152	X;X;X;X;Phospho (STY);X;X;X;X;X;X;X;X;X;X;Phospho (STY);X;X;X;X;X;X;X;X;X;X;X;X;X;X;X	XXXXXXXXXXXXXXPPPPPPPPXXXXXXXXX	HY(1)GNQFPA	HY(74.42)GNQFPA
0	-0.0129497	0.0640997	0.101888	-0.0941722	Y	2	1	0.00194956	81.017	53.535	P14923	480	P14923	P14923	Junction plakoglobin	JUP	RHPEAEMAQNSVRLNYGIPAIVKLLNQPNQW	81.0165	X;X;X;X;X;X;X;X;X;X;X;X;X;X;X;Phospho (STY);X;X;X;X;X;X;X;X;X;X;X;X;X;X;X	XXXXXXXXXXXXXPPPPPPPPPPXXXXXXXX	LNY(1)GIPAIVK	LNY(81.02)GIPAIVK		yes
0	-0.0230102	-0.225867	-0.262566	-0.0943207	Y	2	0.999372	3.32e-05	110.53	79.04	O14974-5;O14974-4;O14974-3;O14974-2;O14974	409;496;496;496;496	O14974-5	O14974-5	Protein phosphatase 1 regulatory subunit 12A	PPP1R12A	DNKEKEKDSKGTRLAYVAPTIPRRLASTSDI	32.0174	X;X;X;X;X;X;X;X;X;X;X;X;X;X;X;Phospho (STY);X;X;X;X;X;X;X;X;X;X;X;X;X;X;X	XXXXXXXXXXXXXPPPPPPPPPPXXXXXXXX	LAY(0.999)VAPT(0.001)IPR	LAY(32.02)VAPT(-32.02)IPR
0	0.03026	0.133622	0.0168509	-0.101359	Y	3	0.999722	0.000639396	92.611	66.91	Q6NXT2;Q71DI3;Q16695;P84243;P68431	54;55;55;55;55	Q6NXT2	Q6NXT2	Histone H3.3C;Histone H3.2;Histone H3.1t;Histone H3.3;Histone H3.1	H3F3C;HIST2H3A;HIST3H3;H3F3A;HIST1H3A	HRYRPGTVALREIRRYQKSTELLIRKLPFQR	36.568	X;X;Phospho (STY);X;X;X;X;X;X;X;X;X;X;X;X;Phospho (STY);X;X;X;X;X;X;X;X;X;X;X;X;X;X;X	XXXXXXXXXXXXXXXPPPPPPPPPPXXXXXX	Y(1)QKSTELLIR	Y(36.57)QKS(-36.57)T(-42.42)ELLIR
0	-0.103674	-0.221642	-0.115141	-0.102924	Y	3	1	0.00454803	83.614	60.595	P62280	99	P62280	P62280	40S ribosomal protein S11	RPS11	RTIVIRRDYLHYIRKYNRFEKRHKNMSVHLS	83.6143	X;X;X;X;X;X;X;X;X;X;X;X;X;X;X;Phospho (STY);X;X;X;X;X;X;X;X;X;X;X;X;X;X;X	XXXXXXXXXXXXXXXPPPPPPXXXXXXXXXX	Y(1)NRFEK	Y(83.61)NRFEK
0	-0.488214	-0.414067	-0.30593	-0.106181	Y	3	0.980516	4.01e-13	159.67	145.05	P78324-4;P78324;P78324-2	495;496;500	P78324-4	P78324-4	Tyrosine-protein phosphatase non-receptor type substrate 1	SIRPA	TPKQPAPKPEPSFSEYASVQVPRK_______	18.7167	X;X;X;X;X;X;X;X;X;X;X;X;X;X;X;Phospho (STY);X;X;X;X;X;X;X;X;X;X;X;X;X;X;X	XXXPPPPPPPPPPPPPPPPPPPPXXXXXXXX	QPAPKPEPSFS(0.006)EY(0.981)AS(0.013)VQVPR	QPAPKPEPS(-44.77)FS(-21.94)EY(18.72)AS(-18.72)VQVPR
0	0.0880938	0.144968	-0.194466	-0.106837	Y	3	0.792445	1.13e-14	161.68	150.7	Q9P2M7-2;Q9P2M7	99;99	Q9P2M7-2	Q9P2M7-2	Cingulin	CGN	ASGALSSDLELPENPYSQVKGFPAPSQSSTS	5.81837	X;X;X;X;X;X;X;X;X;X;X;X;X;X;X;Phospho (STY);X;X;X;X;X;X;X;X;X;X;X;X;X;X;X	PPPPPPPPPPPPPPPPPPPPXXXXXXXXXXX	GANDQGASGALSSDLELPENPY(0.792)S(0.208)QVK	GANDQGAS(-131.17)GALS(-108.68)S(-103.57)DLELPENPY(5.82)S(-5.82)QVK
0	-0.273007	0.0444106	0.00598156	-0.108473	Y	2	0.995214	0.00300608	78.264	28.822	Q9UQ35	2390	Q9UQ35	Q9UQ35	Serine/arginine repetitive matrix protein 2	SRRM2	LSGANLTSPRVPLSAYERVSGRTSPPLLDRA	23.1799	X;X;X;X;X;X;X;X;X;X;X;X;X;X;X;Phospho (STY);X;X;X;X;X;X;X;X;X;X;X;X;X;X;X	XXXXXXXXXXPPPPPPPPXXXXXXXXXXXXX	VPLS(0.005)AY(0.995)ER	VPLS(-23.18)AY(23.18)ER
0	-0.180982	-0.186456	-0.462645	-0.109923	Y	3	0.999999	1.46e-15	193.22	157.67	P62906	11	P62906	P62906	60S ribosomal protein L10a	RPL10A	_____MSSKVSRDTLYEAVREVLHGNQRKRR	59.7966	X;X;X;X;X;X;X;X;X;X;X;X;X;X;X;Phospho (STY);X;X;X;X;X;X;X;X;X;X;X;X;X;X;X	XXXXXXXXXPPPPPPPPPPPXXXXXXXXXXX	VSRDTLY(1)EAVR	VS(-123.57)RDT(-59.8)LY(59.8)EAVR
0	0.197592	-0.0703417	-0.020863	-0.110769	Y	2	0.999995	1.28e-09	179.1	157.53	P08069;P06213-2;P06213	1161;1173;1185	P08069	P08069	Insulin-like growth factor 1 receptor;Insulin-like growth factor 1 receptor alpha chain;Insulin-like growth factor 1 receptor beta chain;Insulin receptor;Insulin receptor subunit alpha;Insulin receptor subunit beta	IGF1R;INSR	DFTVKIGDFGMTRDIYETDYYRKGGKGLLPV	53.0335	X;X;X;X;X;X;X;X;X;X;X;X;X;X;X;Phospho (STY);X;X;X;X;X;X;X;X;X;X;X;X;X;X;X	XXXXXXXXXXXXXPPPPPPPPPPXXXXXXXX	DIY(1)ETDYYR	DIY(53.03)ET(-53.03)DY(-104.83)Y(-125.34)R		yes
0	0.147174	0.089718	-0.0392952	-0.112158	Y	3	1	5.98e-06	124.04	113.27	O43390-4;O43390-3;O43390;O43390-2	431;491;529;532	O43390-4	O43390-4	Heterogeneous nuclear ribonucleoprotein R	HNRNPR	PPRGRGAPPPRGRAGYSQRGAPLGPPRGSRG	124.041	X;X;X;X;X;X;X;X;X;X;X;X;X;X;X;Phospho (STY);Phospho (STY);X;X;X;X;X;X;X;X;X;X;X;X;X;X	XXXXXXXXXXXXXPPPPPPPPPPPPPPXXXX	AGY(1)S(1)QRGAPLGPPR	AGY(124.04)S(124.04)QRGAPLGPPR
0	0.109233	-0.082323	0.0472235	-0.113957	Y	2	0.955238	0.038246	43.979	19.085	P61978	458	P61978	P61978	Heterogeneous nuclear ribonucleoprotein K	HNRNPK	QIQNAQYLLQNSVKQYSGKFF__________	13.292	X;X;X;X;X;X;X;X;X;X;X;X;X;X;X;Phospho (STY);X;X;X;X;X;X;X;X;X;X;X;X;X;X;X	XXXXXXXXXXXXXXPPPPPPPXXXXXXXXXX	QY(0.955)S(0.045)GKFF	QY(13.29)S(-13.29)GKFF
0	0.187525	-0.178631	0.0815902	-0.11653	Y	3	0.999999	7.83e-36	256.52	234.49	Q13480;Q13480-2	259;259	Q13480	Q13480	GRB2-associated-binding protein 1	GAB1	SPPSRAPSASVDSSLYNLPRSYSHDVLPKVS	62.3979	X;X;X;X;X;X;X;X;X;X;X;X;X;X;X;Phospho (STY);X;X;X;X;X;X;X;X;X;X;X;X;X;X;X	XXXXXPPPPPPPPPPPPPPPXXXXXXXXXXX	APSASVDSSLY(1)NLPR	APS(-144.42)AS(-122.13)VDS(-75.15)S(-62.4)LY(62.4)NLPR
0	-0.0926206	-0.137182	-0.226458	-0.117224	Y	3	1	0.000629231	123.53	70.009	P40429	137	P40429	P40429	60S ribosomal protein L13a	RPL13A	AALKVVRLKPTRKFAYLGRLAHEVGWKYQAV	92.1869	X;X;X;X;X;X;X;X;X;X;X;X;X;X;X;Phospho (STY);X;X;X;X;X;X;X;X;X;X;X;X;X;X;X	XXXXXXXXXXXXPPPPPPPXXXXXXXXXXXX	KFAY(1)LGR	KFAY(92.19)LGR		yes
0	0.0427383	-0.247729	0.0702246	-0.117652	Y	3	0.997547	0.000734563	90.913	68.92	O60613	120	O60613	O60613	15 kDa selenoprotein	SEPT15	VRSDKPKLFRGLQIKYVRGSDPVLKLLDDNG	26.0931	X;X;X;X;X;X;X;X;X;X;X;X;X;X;X;Phospho (STY);X;X;X;X;X;X;X;X;X;X;X;X;X;X;X	XXXXXXXXXXXXXXXPPPPPPPPPPXXXXXX	Y(0.998)VRGS(0.002)DPVLK	Y(26.09)VRGS(-26.09)DPVLK
0	0.0653878	0.124962	-0.141277	-0.118998	Y	3	0.999936	0.00988007	66.692	49.596	P14866;P14866-2	267;134	P14866	P14866	Heterogeneous nuclear ribonucleoprotein L	HNRNPL	NGADIYSGCCTLKIEYAKPTRLNVFKNDQDT	41.9163	X;X;X;X;X;X;X;X;X;X;X;X;X;X;X;Phospho (STY);X;X;X;X;X;X;X;X;X;X;X;X;X;X;X	XXXXXXXXXXXXXPPPPPPPPXXXXXXXXXX	IEY(1)AKPTR	IEY(41.92)AKPT(-41.92)R
0	-0.120265	-0.293493	-0.513482	-0.120561	Y	3	0.999999	1.25e-05	129.89	103.51	P17706-3;P17706-2;P17706-4;P17706	32;32;32;32	P17706-3	P17706-3	Tyrosine-protein phosphatase non-receptor type 2	PTPN2	RWQPLYLEIRNESHDYPHRVAKFPENRNRNR	60.0253	X;X;X;X;X;X;X;X;X;X;X;X;X;X;X;Phospho (STY);X;X;X;X;X;X;X;X;X;X;X;X;X;X;X	XXXXXXXXXXPPPPPPPPPXXXXXXXXXXXX	NESHDY(1)PHR	NES(-60.03)HDY(60.03)PHR
0	-0.166359	0.152336	-0.0216972	-0.120946	Y	2	0.999853	0.0109447	67.032	62.92	Q04900-4;Q04900-3;Q04900	175;181;194	Q04900-4	Q04900-4	Sialomucin core protein 24	CD164	VIFFLYKFCKSKERNYHTL____________	38.3221	X;X;X;X;X;X;X;X;X;X;X;X;X;X;X;Phospho (STY);X;X;X;X;X;X;X;X;X;X;X;X;X;X;X	XXXXXXXXXXXXPPPPPPPXXXXXXXXXXXX	ERNY(1)HTL	ERNY(38.32)HT(-38.32)L
0	0.01459	-0.237252	-0.011843	-0.121346	Y	2	0.794266	0.0020773	77.185	64.177	P13051	8	P13051	P13051	Uracil-DNA glycosylase	UNG	________MIGQKTLYSFFSPSPARKRHAPS	6.00891	X;X;X;X;X;X;X;X;X;X;X;X;X;X;X;Phospho (STY);X;X;X;X;X;X;X;X;X;X;X;X;X;X;X	XXXXXXXXXXXXXPPPPPPPPPPPPXXXXXX	T(0.006)LY(0.794)S(0.199)FFSPSPAR	T(-20.98)LY(6.01)S(-6.01)FFS(-34.34)PS(-60.83)PAR
0	0.0243049	0.0164045	0.161733	-0.122882	Y	3	1	2.96e-06	127.92	107.93	Q9UII2-3;Q9UII2-2;Q9UII2	58;58;58	Q9UII2-3	Q9UII2-3	ATPase inhibitor, mitochondrial	ATPIF1	AGGAFGKREQAEEERYFR_____________	127.917	X;X;X;X;X;X;X;X;X;X;X;X;X;X;X;Phospho (STY);X;X;X;X;X;X;X;X;X;X;X;X;X;X;X	XXXXXXXXPPPPPPPPPPXXXXXXXXXXXXX	EQAEEERY(1)FR	EQAEEERY(127.92)FR
0	-0.251679	-0.277358	-0.0740403	-0.124297	Y	3	1	0.0210388	61.815	45.042	Q9BY89	733	Q9BY89	Q9BY89	Uncharacterized protein KIAA1671	KIAA1671	KHLENPPTSQRIEPRYDIVHAVGERVHSEAI	61.8154	X;X;X;X;X;X;X;X;X;X;X;X;X;X;X;Phospho (STY);X;X;X;X;X;X;X;X;X;X;X;X;X;X;X	XXXXXXXXXXXXXXXPPPPPPPPPPXXXXXX	Y(1)DIVHAVGER	Y(61.82)DIVHAVGER
0	0.012886	-0.415869	-0.28545	-0.125452	Y	2	1	0.011002	76.553	46.711	Q4VXU2-2;Q4VXU2	262;262	Q4VXU2-2	Q4VXU2-2	Polyadenylate-binding protein 1-like	PABPC1L	AVVHMNGKEVSGRLLYAGRAQKRVERQNELK	76.5528	X;X;X;X;X;X;X;X;X;X;X;X;X;X;X;Phospho (STY);X;X;X;X;X;X;X;X;X;X;X;X;X;X;X	XXXXXXXXXXXXXPPPPPPXXXXXXXXXXXX	LLY(1)AGR	LLY(76.55)AGR
0	-0.0249041	0.426134	0.212349	-0.125606	Y	3	1	0.00151491	86.833	63.813	O00541-2;O00541	44;44	O00541-2	O00541-2	Pescadillo homolog	PES1	LSLADFRRLCILKGIYPHEPKHKKKVNKGST	86.8328	X;X;X;X;X;X;X;X;X;X;X;X;X;X;X;Phospho (STY);X;X;X;X;X;X;X;X;X;X;X;X;X;X;X	XXXXXXXXXXXXXPPPPPPPPXXXXXXXXXX	GIY(1)PHEPK	GIY(86.83)PHEPK
0	0.0329419	0.378573	-0.213006	-0.125678	Y	3	1	0.00296216	74.611	52.556	Q16637-4;Q16637-2;Q16637-3;Q16637	43;43;43;43	Q16637-4	Q16637-4	Survival motor neuron protein	SMN1	SDDSDIWDDTALIKAYDKAVASFKHALKNGD	65.2889	X;X;X;X;X;X;X;X;X;X;X;X;X;X;X;Phospho (STY);X;X;X;X;X;X;X;X;X;X;X;X;X;X;X	XXXXXXXXXXXXXXPPPPPPPPPPXXXXXXX	AY(1)DKAVASFK	AY(65.29)DKAVAS(-65.29)FK
0	-0.0193885	-0.00376839	-0.491475	-0.126205	Y	3	0.999976	0.00123491	98.523	71.393	P16989-3;P16989;P16989-2	287;287;218	P16989-3	P16989-3	Y-box-binding protein 3	YBX3	PEGAQLQGPVHRNPTYRPRYRSRGPPRPRPA	46.1204	X;X;X;X;X;X;X;X;X;X;X;X;X;X;X;Phospho (STY);X;X;X;X;X;X;X;X;X;X;X;X;X;X;X	XXXXXXXXXXXXPPPPPPPXXXXXXXXXXXX	NPTY(1)RPR	NPT(-46.12)Y(46.12)RPR
0	-0.0749757	-0.110687	-0.0521089	-0.127417	Y	3	1	1.34e-05	120.77	108.87	P07947;P06241-3;P06241-2;P06241;P12931;P12931-2	446;385;437;440;439;445	P07947;P12931	P07947	Tyrosine-protein kinase Yes;Tyrosine-protein kinase Fyn;Proto-oncogene tyrosine-protein kinase Src	YES1;FYN;SRC	GAKFPIKWTAPEAALYGRFTIKSDVWSFGIL	77.8084	X;X;X;X;X;X;X;X;X;X;X;X;X;X;X;Phospho (STY);X;X;X;X;X;X;X;X;X;X;X;X;X;X;X	XXXPPPPPPPPPPPPPPPXXXXXXXXXXXXX	FPIKWTAPEAALY(1)GR	FPIKWT(-77.81)APEAALY(77.81)GR		yes
0	-0.0240713	0.0017455	-0.0797662	-0.127437	Y	3	0.989605	5.74e-09	149.32	115.12	Q7Z6E9-2;Q7Z6E9	864;898	Q7Z6E9-2	Q7Z6E9-2	E3 ubiquitin-protein ligase RBBP6	RBBP6	YVGGQSHRSRNIGSNYPEKLSARDGHNQKDN	19.7865	X;X;X;X;X;X;X;X;X;X;X;X;X;X;X;Phospho (STY);X;X;X;X;X;X;X;X;X;X;X;X;X;X;X	XXXXXXXXXXPPPPPPPPPPPPPXXXXXXXX	NIGS(0.01)NY(0.99)PEKLSAR	NIGS(-19.79)NY(19.79)PEKLS(-67.26)AR
0	-0.248647	-0.130772	-0.0598746	-0.133147	Y	3	1	4.47e-14	184	157.47	Q12830-4;Q12830-2;Q12830	1956;1830;1956	Q12830-4	Q12830-4	Nucleosome-remodeling factor subunit BPTF	BPTF	EITTTEIIKRRDVGPYGIRSEYCIRKIICPI	95.4831	X;X;X;X;X;X;X;X;X;X;X;X;X;X;X;Phospho (STY);X;X;X;X;X;X;X;X;X;X;X;X;X;X;X	XXXXXXXXXXPPPPPPPPPPPPPPPXXXXXX	RDVGPY(1)GIR	RDVGPY(95.48)GIR
0	0.133453	-0.00132764	-0.000223221	-0.135866	Y	3	1	0.000448605	92.856	81.91	Q9NQ84;Q9NQ84-2	438;450	Q9NQ84	Q9NQ84	G-protein coupled receptor family C group 5 member C	GPRC5C	TPPKDGKNSQVFRNPYVWD____________	76.9158	X;X;X;X;X;X;X;X;X;X;X;X;X;X;X;Phospho (STY);X;X;X;X;X;X;X;X;X;X;X;X;X;X;X	XXXXXXXPPPPPPPPPPPPXXXXXXXXXXXX	NSQVFRNPY(1)VWD	NS(-76.92)QVFRNPY(76.92)VWD		yes
0	-0.0624316	-0.0534592	0.140105	-0.139333	Y	3	0.997419	1.08e-07	132.03	78.791	P07948	32	P07948	P07948	Tyrosine-protein kinase Lyn	LYN	VDLKTQPVRNTERTIYVRDPTSNKQQRPVPE	25.8709	X;X;X;X;X;X;X;X;X;X;X;X;X;X;X;Phospho (STY);X;X;X;X;X;X;X;X;X;X;X;X;X;X;X	XXXXXXXXXXXXXPPPPPPPPPPPXXXXXXX	T(0.003)IY(0.997)VRDPTSNK	T(-25.87)IY(25.87)VRDPT(-95.71)S(-101.14)NK		yes
0	0.501903	0.0199063	0.202243	-0.140174	Y	2	0.857557	5.37e-06	134.25	109.47	O60814;P57053;Q99880;Q99879;Q99877;Q93079;Q5QNW6;P62807;P58876;Q5QNW6-2	38;38;38;38;38;38;38;38;38;38	O60814;Q99880	Q99880	Histone H2B type 1-K;Histone H2B type F-S;Histone H2B type 1-L;Histone H2B type 1-M;Histone H2B type 1-N;Histone H2B type 1-H;Histone H2B type 2-F;Histone H2B type 1-C/E/F/G/I;Histone H2B type 1-D	HIST1H2BK;H2BFS;HIST1H2BL;HIST1H2BM;HIST1H2BN;HIST1H2BH;HIST2H2BF;HIST1H2BC;HIST1H2BD	QKKDGKKRKRSRKESYSVYVYKVLKQVHPDT	8.17933	X;X;X;X;X;X;X;X;X;X;X;X;X;X;X;Phospho (STY);X;X;X;X;X;X;X;X;X;X;X;X;X;X;X	XXXXXXXXXXXXPPPPPPPPPPXXXXXXXXX	ES(0.13)Y(0.858)S(0.012)VYVYK	ES(-8.18)Y(8.18)S(-18.53)VY(-53.49)VY(-77.21)K
0	0.0611432	-0.0162318	-0.293937	-0.140328	Y	3	0.997781	6.14e-09	151.13	128.49	A8MVW0	670	A8MVW0	A8MVW0	Protein FAM171A2	FAM171A2	FVSLDGRSNSQVRHSYIDLQAGGGARSTDAS	26.5278	X;X;X;X;X;X;X;X;X;X;X;X;X;X;X;Phospho (STY);X;X;X;X;X;X;X;X;X;X;X;X;X;X;X	XXXXXXXXXXXXXPPPPPPPPPPPPPXXXXX	HS(0.002)Y(0.998)IDLQAGGGAR	HS(-26.53)Y(26.53)IDLQAGGGAR
0	-0.0522625	-0.0718718	-0.306299	-0.14083	Y	2	1	0.00546432	82.263	58.29	Q9Y5Y0	22	Q9Y5Y0	Q9Y5Y0	Feline leukemia virus subgroup C receptor-related protein 1	FLVCR1	EEGAAVAPGHPLAKGYLPLPRGAPVGKESVE	82.2626	X;X;X;X;X;X;X;X;X;X;X;X;X;X;X;Phospho (STY);X;X;X;X;X;X;X;X;X;X;X;X;X;X;X	XXXXXXXXXXXXXXPPPPPPPXXXXXXXXXX	GY(1)LPLPR	GY(82.26)LPLPR
0	0.0695989	-0.163635	-0.156049	-0.141556	Y	2	1	0.000708113	104.75	57.089	Q9BW85	31	Q9BW85	Q9BW85	Coiled-coil domain-containing protein 94	CCDC94	DPSKIPKLKLPKDRQYVVRLMAPFNMRCKTC	104.747	X;X;X;X;X;X;X;X;X;X;X;X;X;X;X;Phospho (STY);X;X;X;X;X;X;X;X;X;X;X;X;X;X;X	XXXXXXXXXXXXPPPPPPPXXXXXXXXXXXX	DRQY(1)VVR	DRQY(104.75)VVR
0	-0.1036	-0.18095	-0.205534	-0.142648	Y	3	0.998012	1.3e-27	219.3	203.58	O14828;O14828-2	83;57	O14828	O14828	Secretory carrier-associated membrane protein 3	SCAMP3	SLQPSRKLSPTEPKNYGSYSTQASAAAATAE	27.0344	X;X;X;X;X;X;X;X;X;X;X;X;X;X;X;Phospho (STY);X;X;X;X;X;X;X;X;X;X;X;X;X;X;X	XXXXXXXXXXXXXXPPPPPPPPPPPPPPPPP	NY(0.998)GS(0.002)YSTQASAAAATAELLKK	NY(27.03)GS(-27.03)Y(-49.26)S(-62.43)T(-85.46)QAS(-150.21)AAAAT(-202.15)AELLKK		yes
0	0.168941	0.0953581	0.032215	-0.143642	Y	3	1	1.15e-19	199.61	183.6	Q13443	769	Q13443	Q13443	Disintegrin and metalloproteinase domain-containing protein 9	ADAM9	PRHVSPVTPPREVPIYANRFAVPTYAAKQPQ	125.582	X;X;X;X;X;X;X;Phospho (STY);X;X;X;X;X;X;X;Phospho (STY);X;X;X;X;X;X;X;X;Phospho (STY);X;X;X;X;X;X	XXPPPPPPPPPPPPPPPPPXXXXXXXXXXXX	HVS(0.024)PVT(0.976)PPREVPIY(1)ANR	HVS(-16.16)PVT(16.16)PPREVPIY(125.58)ANR
0	-0.120782	-0.0118932	-0.11189	-0.144954	Y	3	1	2.55e-12	161.25	146.65	P53801	174	P53801	P53801	Pituitary tumor-transforming gene 1 protein-interacting protein	PTTG1IP	DEIRKKYGLFKEENPYARFENN_________	97.2211	X;X;X;X;X;X;X;X;X;X;X;X;X;X;X;Phospho (STY);X;X;X;X;X;X;X;X;X;X;X;X;X;X;X	XXXXXXPPPPPPPPPPPPPPPPXXXXXXXXX	YGLFKEENPY(1)ARFENN	Y(-97.22)GLFKEENPY(97.22)ARFENN
0	-0.0363796	0.0570771	0.0135964	-0.145251	Y	3	0.999994	3.66e-08	154.15	116.02	P12236;P12235	191;191	P12236	P12236	ADP/ATP translocase 3;ADP/ATP translocase 1	SLC25A6;SLC25A4	GFSVSVQGIIIYRAAYFGVYDTAKGMLPDPK	52.3466	X;X;X;X;X;X;X;X;X;X;X;X;X;X;X;Phospho (STY);X;X;X;X;X;X;X;X;X;X;X;X;X;X;X	XXXXXXXXXXXXXPPPPPPPPPPPXXXXXXX	AAY(1)FGVYDTAK	AAY(52.35)FGVY(-52.35)DT(-93.57)AK		yes
0	-0.0592592	-0.332413	-0.0619527	-0.145378	Y	3	0.999999	1.9e-05	108.56	76.683	P17948-7;P17948-8;P17948-6;P17948-5;P17948	58;76;178;271;1053	P17948-7	P17948-7	Vascular endothelial growth factor receptor 1	FLT1	ICDFGLARDIYKNPDYVRKGDTRLPLKWMAP	60.2799	X;X;X;X;X;X;X;X;X;X;X;X;X;X;X;Phospho (STY);X;X;X;X;X;X;X;X;X;X;X;X;X;X;X	XXXXXXXXPPPPPPPPPPXXXXXXXXXXXXX	DIYKNPDY(1)VR	DIY(-60.28)KNPDY(60.28)VR
0	-0.0448381	-0.0343713	0.0662081	-0.148261	Y	3	1	1.19e-16	188.15	155.88	O95297-5;O95297-4;O95297-2;O95297	113;139;262;263	O95297-5	O95297-5	Myelin protein zero-like protein 1	MPZL1	GGHHSDKINKSESVVYADIRKN_________	71.3075	X;X;X;X;X;X;X;X;X;X;X;X;X;X;X;Phospho (STY);X;X;X;X;X;X;X;X;X;X;X;X;X;X;X	XXXXXXXPPPPPPPPPPPPPPPXXXXXXXXX	SESVVY(1)ADIR	S(-87.72)ES(-71.31)VVY(71.31)ADIR		yes
0	0.16348	-0.0986653	0.0413927	-0.149793	Y	3	0.954633	0.0223753	55.261	37.596	P48634-2;P48634-3;P48634	1001;1013;1013	P48634-2	P48634-2	Protein PRRC2A	PRRC2A	PPNGNLSPAPRLRRDYSYERVGPTSCRGRGR	13.2305	X;X;X;X;X;X;X;X;X;X;X;X;X;X;X;Phospho (STY);Phospho (STY);X;X;X;X;X;X;X;X;X;X;X;X;X;X	XXXXXXXXXXXPPPPPPPPPXXXXXXXXXXX	LRRDY(0.955)S(1)Y(0.045)ER	LRRDY(13.23)S(40.12)Y(-13.23)ER
0	0.055908	0.0876669	-0.04163	-0.151004	Y	3	0.844464	0.0326255	40.724	12.55	O43818	213	O43818	O43818	U3 small nucleolar RNA-interacting protein 2	RRP9	HSSHVLCMAISSDGKYLASGDRSKLILIWEA	7.34601	X;X;X;X;X;X;X;X;X;X;X;X;X;X;X;Phospho (STY);X;X;X;X;X;X;Phospho (STY);X;X;X;X;X;X;X;X	XXXXXXXXXXXXXXXPPPPPPPPPXXXXXXX	Y(0.844)LAS(0.156)GDRS(1)K	Y(7.35)LAS(-7.35)GDRS(34.69)K
0	0.0167375	0.181394	0.092279	-0.152369	Y	2	1	0.0162987	72.62	42.55	O00764-2;O00764	18;18	O00764-2	O00764-2	Pyridoxal kinase	PDXK	EECRVLSIQSHVIRGYVGNRAATFPLQVLGF	72.6199	X;X;X;X;X;X;X;X;X;X;X;X;X;X;X;Phospho (STY);X;X;X;X;X;X;X;X;X;X;X;X;X;X;X	XXXXXXXXXXXXXXPPPPPPXXXXXXXXXXX	GY(1)VGNR	GY(72.62)VGNR
0	-0.19471	0.124813	-0.0629606	-0.15287	Y	3	1	2.1e-05	105.2	87.376	A6NIX2	399	A6NIX2	A6NIX2	Wilms tumor protein 1-interacting protein	WTIP	EDCGLQLSGEEGRRCYPLAGHLLCRRCHLRR	105.195	X;X;X;X;X;X;X;X;X;X;X;X;X;X;X;Phospho (STY);X;X;X;X;X;X;X;X;X;X;X;X;X;X;X	XXXXXXXXXXXXXXPPPPPPPPPPPXXXXXX	CY(1)PLAGHLLCR	CY(105.2)PLAGHLLCR
0	0.139834	-0.0347578	-0.0724165	-0.154423	Y	2	0.999794	0.000721923	94.114	12.331	P38159-2;P38159;Q96E39	193;206;206	P38159-2	P38159-2	RNA-binding motif protein, X chromosome;RNA-binding motif protein, X chromosome, N-terminally processed;RNA binding motif protein, X-linked-like-1	RBMX;RBMXL1	GGPPRREPLPSRRDVYLSPRDDGYSTKDSYS	36.8654	X;X;X;X;X;X;X;X;X;X;X;X;X;X;X;Phospho (STY);X;X;X;X;X;X;X;X;Phospho (STY);X;X;X;X;X;X	XXXXXXXXXXXXXPPPPPPPPPPPPPPXXXX	DVY(1)LSPR	DVY(36.87)LS(-36.87)PR
0	-0.0194205	-0.153266	0.242499	-0.155804	Y	3	1	1.4e-05	116.51	91.581	P50552	39	P50552	P50552	Vasodilator-stimulated phosphoprotein	VASP	LPAGTGPQAFSRVQIYHNPTANSFRVVGRKM	80.7657	X;X;X;X;X;X;X;X;X;X;X;X;X;X;X;Phospho (STY);X;X;X;X;X;X;X;X;X;X;X;X;X;X;X	XXXXXXXXXXXXPPPPPPPPPPPPPXXXXXX	VQIY(1)HNPTANSFR	VQIY(80.77)HNPT(-80.77)ANS(-97.72)FR
0	-0.271363	0.101619	0.00426503	-0.15884	Y	3	0.968093	0.000762653	95.608	60.456	P00367-2;P00367-3;P49448;P00367	284;318;451;451	P00367-2	P00367-2	Glutamate dehydrogenase 1, mitochondrial;Glutamate dehydrogenase 2, mitochondrial	GLUD1;GLUD2	TVSYFEWLKNLNHVSYGRLTFKYERDSNYHL	14.8202	X;X;X;X;X;X;X;X;X;X;X;X;X;X;X;Phospho (STY);X;X;X;X;X;X;X;X;X;X;X;X;X;X;X	XXXXXXXXXPPPPPPPPPXXXXXXXXXXXXX	NLNHVS(0.032)Y(0.968)GR	NLNHVS(-14.82)Y(14.82)GR
0	0.147523	0.0556507	0.159141	-0.160826	Y	3	0.863544	6.19e-06	110.92	96.914	Q05397-3;Q05397-2;Q05397-7;Q05397;Q05397-5;Q05397-4	424;424;576;576;576;424	Q05397-3	Q05397-3	Focal adhesion kinase 1	PTK2	KLGDFGLSRYMEDSTYYKASKGKLPIKWMAP	8.0775	X;X;X;X;X;X;X;X;X;X;Oxidation (M);X;X;X;X;Phospho (STY);X;X;X;X;X;X;X;X;X;X;X;X;X;X;X	XXXXXXXXXPPPPPPPPPPPPXXXXXXXXXX	YMEDST(0.002)Y(0.864)Y(0.134)K	Y(-63.21)MEDS(-39.6)T(-26.53)Y(8.08)Y(-8.08)K
0	0.0639853	0.280448	-0.331058	-0.161386	Y	3	1	7.24e-09	150.69	141.12	P48634-2;P48634-3;P48634;P48634-4	624;636;636;636	P48634-2	P48634-2	Protein PRRC2A	PRRC2A	DGIGPTRQPPSQGLGYPKYQKSLPPRFQRQQ	90.2943	X;X;X;X;X;X;X;X;X;X;X;X;X;X;X;Phospho (STY);X;X;X;X;X;X;X;X;X;X;X;X;X;X;X	PPPPPPPPPPPPPPPPPPXXXXXXXXXXXXX	QPPSQGLGY(1)PK	QPPS(-90.29)QGLGY(90.29)PK
0	-0.13863	-0.0185064	-0.30607	-0.165378	Y	2	1	4.4e-09	164.53	93.154	P23396;P23396-2	120;136	P23396	P23396	40S ribosomal protein S3	RPS3	LRYKLLGGLAVRRACYGVLRFIMESGAKGCE	84.4978	X;X;X;X;X;X;X;X;X;X;X;X;X;X;X;Phospho (STY);X;X;X;X;X;X;X;X;X;X;X;X;X;X;X	XXXXXXXXXXXXPPPPPPPPXXXXXXXXXXX	RACY(1)GVLR	RACY(84.5)GVLR
0	-0.132176	-0.201253	0.0578514	-0.16614	Y	3	0.991461	9.72e-05	94.384	85.349	Q4VCS5;Q4VCS5-2	420;11	Q4VCS5	Q4VCS5	Angiomotin	AMOT	EAYSAMPRAQPSSASYQPVPADPFAIVSRAQ	20.7121	X;X;X;X;X;X;X;X;X;X;X;X;X;X;X;Phospho (STY);X;X;X;X;X;X;X;X;X;X;X;X;X;X;X	XXXXXXXXPPPPPPPPPPPPPPPPPPPPPXX	AQPSSAS(0.008)Y(0.991)QPVPADPFAIVSR	AQPS(-45.29)S(-40.22)AS(-20.71)Y(20.71)QPVPADPFAIVS(-76.66)R		yes
0	0.185819	0.241319	0.00380651	-0.171779	Y	2	1	0.00244201	93.885	58.714	Q8N1G0-2;Q8N1G0	1023;1023	Q8N1G0-2	Q8N1G0-2	Zinc finger protein 687	ZNF687	LRRHVRVNHEGIKRVYPCRSKGPGLRAVPLL	66.9935	X;X;X;X;X;X;X;X;X;X;X;X;X;X;X;Phospho (STY);X;X;X;X;X;X;X;X;X;X;X;X;X;X;X	XXXXXXXXXXXXXPPPPPPXXXXXXXXXXXX	RVY(1)PCR	RVY(66.99)PCR
0	NaN	-0.47298	-0.0521695	-0.171951	Y	3	1	3.64e-06	144.65	84.214	Q8WUW1;Q8WUW1-2	63;63	Q8WUW1	Q8WUW1	Protein BRICK1	BRK1	ATLNEKLTALERRIEYIEARVTKGETLT___	144.65	X;X;X;X;X;X;X;X;X;X;X;X;X;X;X;Phospho (STY);X;X;X;X;X;X;X;X;X;X;X;X;X;X;X	XXXXXXXXXXXXPPPPPPPPXXXXXXXXXXX	RIEY(1)IEAR	RIEY(144.65)IEAR
0	-0.355677	-0.404507	-0.130108	-0.172444	Y	2	1	0.00555567	81.784	35.413	Q969P6-2;Q969P6;P11387	461;559;723	Q969P6-2	Q969P6-2	DNA topoisomerase I, mitochondrial;DNA topoisomerase 1	TOP1MT;TOP1	KEENKQVALGTSKLNYLDPRISIAWCKRFRV	81.7839	X;X;X;X;X;X;X;X;X;X;X;X;X;X;X;Phospho (STY);X;X;X;X;X;X;X;X;X;X;X;X;X;X;X	XXXXXXXXXXXXXPPPPPPPXXXXXXXXXXX	LNY(1)LDPR	LNY(81.78)LDPR
0	-0.0392172	-0.0317917	-0.0727408	-0.172576	Y	4	0.981205	8.69e-14	178.51	164.4	P29317	772	P29317	P29317	Ephrin type-A receptor 2	EPHA2	DFGLSRVLEDDPEATYTTSGGKIPIRWTAPE	18.0768	X;X;X;X;X;X;X;X;X;X;X;X;X;X;X;Phospho (STY);X;X;X;X;X;X;X;X;X;X;X;X;X;X;X	XXXXXXPPPPPPPPPPPPPPPPPPPPXXXXX	VLEDDPEAT(0.015)Y(0.981)T(0.003)TSGGKIPIR	VLEDDPEAT(-18.08)Y(18.08)T(-24.76)T(-36.82)S(-44.65)GGKIPIR		yes
0	0.210873	0.359998	-0.173881	-0.173114	Y	3	0.998375	1.1e-05	113.76	91.984	P04075;P04075-2	5;59	P04075	P04075	Fructose-bisphosphate aldolase A	ALDOA	___________MPYQYPALTPEQKKELSDIA	27.9198	X;X;X;X;X;X;X;X;X;X;X;X;X;X;X;Phospho (STY);X;X;X;X;X;X;X;X;X;X;X;X;X;X;X	XXXXXXXXXXXXPPPPPPPPPPPPPXXXXXX	PY(0.002)QY(0.998)PALTPEQKK	PY(-27.92)QY(27.92)PALT(-48.71)PEQKK
0	-0.0360865	0.0158823	0.00974062	-0.173359	Y	2	0.998399	3.08e-27	218.2	184.62	Q86X29-6;Q86X29-5;Q86X29-3;Q86X29-4;Q86X29	216;304;353;353;372	Q86X29-6	Q86X29-6	Lipolysis-stimulated lipoprotein receptor	LSR	PGDVDRSSSAGGQGSYVPLLRDTDSSVASEV	27.9493	X;X;X;X;X;X;X;X;X;X;X;X;X;X;X;Phospho (STY);X;X;X;X;X;X;X;X;X;X;X;X;X;X;X	XXXXXXPPPPPPPPPPPPPPPXXXXXXXXXX	SSSAGGQGS(0.002)Y(0.998)VPLLR	S(-132.64)S(-122.02)S(-100.87)AGGQGS(-27.95)Y(27.95)VPLLR		yes
0	0.0354591	0.0457151	0.196355	-0.178898	Y	3	0.805621	1.59e-05	109.15	98.388	P14866	47	P14866	P14866	Heterogeneous nuclear ribonucleoprotein L	HNRNPL	MVKMAAAGGGGGGGRYYGGGSEGGRAPKRLK	6.17487	X;X;X;X;X;X;X;X;X;X;X;X;X;X;X;Phospho (STY);X;X;X;X;X;X;X;X;X;X;X;X;X;X;X	XXXXXXXXXXXXXXXPPPPPPPPPPPPPXXX	Y(0.806)Y(0.194)GGGSEGGRAPK	Y(6.17)Y(-6.17)GGGS(-56.11)EGGRAPK
0	-0.184526	0.0542604	-0.236597	-0.180495	Y	2	1	2.81e-06	134.26	91.924	P61313-2;P61313	59;59	P61313-2	P61313-2	60S ribosomal protein L15	RPL15	RPDKARRLGYKAKQGYVIYRIRVRRGGRKRP	67.2702	X;X;X;X;X;X;X;X;X;X;X;X;X;X;X;Phospho (STY);X;X;X;X;X;X;X;X;X;X;X;X;X;X;X	XXXXXXXXXXXPPPPPPPPPXXXXXXXXXXX	QGY(1)VIYR	QGY(67.27)VIY(-67.27)R		yes
0	-0.437524	-0.236556	-0.0342297	-0.18443	Y	2	1	0.0195368	70.49	10.599	P84090	92	P84090	P84090	Enhancer of rudimentary homolog	ERH	QTYQPYNKDWIKEKIYVLLRRQAQQAGK___	70.4897	X;X;X;X;X;X;X;X;X;X;X;X;X;X;X;Phospho (STY);X;X;X;X;X;X;X;X;X;X;X;X;X;X;X	XXXXXXXXXXXXXXPPPPPPXXXXXXXXXXX	IY(1)VLLR	IY(70.49)VLLR
0	-0.0261905	-0.167859	-0.352772	-0.185489	Y	3	0.983095	2.18e-05	109.79	81.879	Q14011;Q14011-3;Q14011-2	135;82;101	Q14011	Q14011	Cold-inducible RNA-binding protein	CIRBP	DRGYGGNRFESRSGGYGGSRDYYSSRSQSGG	20.6568	X;X;X;X;X;X;X;X;X;X;X;X;X;X;X;Phospho (STY);X;X;X;X;X;X;Phospho (STY);X;X;X;X;X;X;X;X	XXXXXXXXXXXXPPPPPPPPPPPPPPXXXXX	S(0.008)GGY(0.983)GGS(0.008)RDYYSSR	S(-20.66)GGY(20.66)GGS(-20.66)RDY(-55.4)Y(-64.07)S(-85.24)S(-92.15)R
0	-0.242849	-0.3848	-0.101729	-0.185955	Y	2	0.970225	0.040474	54.776	24.273	Q7Z4V5-2;Q7Z4V5;Q7Z4V5-4;Q7Z4V5-3	543;543;543;543	Q7Z4V5-2	Q7Z4V5-2	Hepatoma-derived growth factor-related protein 2	HDGFRP2	RYKANKDVMEKAAEVYTRLKSRVLGPKIEAV	15.1302	X;X;X;X;X;X;X;X;X;X;X;X;X;X;X;Phospho (STY);X;X;X;X;X;X;X;X;X;X;X;X;X;X;X	XXXXXXXXXXXPPPPPPPXXXXXXXXXXXXX	AAEVY(0.97)T(0.03)R	AAEVY(15.13)T(-15.13)R
0	-0.139128	0.0576033	0.102169	-0.187104	Y	3	1	0.00121333	81.95	45.555	Q07157-2;Q07157	198;198	Q07157-2	Q07157-2	Tight junction protein ZO-1	TJP1	KPTKVTLVKSRKNEEYGLRLASHIFVKEISQ	81.9504	X;X;X;X;X;X;X;X;X;X;X;X;X;X;X;Phospho (STY);X;X;X;X;X;X;X;X;X;X;X;X;X;X;X	XXXXXXXXXXXPPPPPPPPXXXXXXXXXXXX	KNEEY(1)GLR	KNEEY(81.95)GLR
0	0.128725	-0.255783	0.133577	-0.187175	Y	3	0.91788	0.0113471	66.994	10.483	P19525	293	P19525	P19525	Interferon-induced, double-stranded RNA-activated protein kinase	EIF2AK2	FGQVFKAKHRIDGKTYVIKRVKYNNEKAERE	10.4834	X;X;X;X;X;X;X;X;X;X;X;X;X;X;X;Phospho (STY);X;X;X;X;X;X;X;X;X;X;X;X;X;X;X	XXXXXXXXXXXXXXPPPPPPXXXXXXXXXXX	T(0.082)Y(0.918)VIKR	T(-10.48)Y(10.48)VIKR
0	-0.170586	-0.253072	-0.136994	-0.187428	Y	3	1	0.000599711	93.649	75.829	Q5SW79-2;Q5SW79-3;Q5SW79	364;364;364	Q5SW79-2	Q5SW79-2	Centrosomal protein of 170 kDa	CEP170	RTEEDSKSIKSDVPVYLKRLKGNKHDDGTQS	70.3293	X;X;X;X;X;X;X;X;X;X;X;X;X;X;X;Phospho (STY);X;X;X;X;X;X;X;X;X;X;X;X;X;X;X	XXXXXXXXXXPPPPPPPPPXXXXXXXXXXXX	SDVPVY(1)LKR	S(-70.33)DVPVY(70.33)LKR
0	0.215326	0.00301879	0.227844	-0.188128	Y	2	0.997445	0.0343218	57.55	31.165	Q6UN15-4;Q6UN15-3;Q6UN15-5;Q6UN15	114;114;114;129	Q6UN15-4	Q6UN15-4	Pre-mRNA 3'-end-processing factor FIP1	FIP1L1	GTAPVNLNIKTGGRVYGTTGTKVKGVDLDAP	26.9857	X;X;X;X;X;X;X;X;X;X;X;X;X;X;X;Phospho (STY);X;X;X;X;X;X;X;X;X;X;X;X;X;X;X	XXXXXXXXXXXXXXPPPPPPPPXXXXXXXXX	VY(0.997)GT(0.002)T(0.001)GTK	VY(26.99)GT(-26.99)T(-32.77)GT(-45.02)K
0	-0.117564	0.0269713	0.0580906	-0.18921	Y	3	0.862437	1.05e-05	121.9	111.61	P29597	1054	P29597	P29597	Non-receptor tyrosine-protein kinase TYK2	TYK2	IGDFGLAKAVPEGHEYYRVREDGDSPVFWYA	7.97227	X;X;X;X;X;X;X;X;X;X;X;X;X;X;X;Phospho (STY);X;X;X;X;X;X;X;X;X;X;X;X;X;X;X	XXXXXXXXPPPPPPPPPPXXXXXXXXXXXXX	AVPEGHEY(0.862)Y(0.138)R	AVPEGHEY(7.97)Y(-7.97)R
0	-0.15292	0.0216102	-0.230693	-0.189753	Y	3	0.987774	3.81e-20	211.12	201.34	O76039-2;O76039	171;171	O76039-2	O76039-2	Cyclin-dependent kinase-like 5	CDKL5	FARNLSEGNNANYTEYVATRWYRSPELLLGA	19.1578	X;X;X;X;X;X;X;X;X;X;X;X;X;X;X;Phospho (STY);X;X;X;X;X;X;X;X;X;X;X;X;X;X;X	XXXPPPPPPPPPPPPPPPPPXXXXXXXXXXX	NLSEGNNANYTEY(0.988)VAT(0.012)R	NLS(-183.53)EGNNANY(-73.39)T(-36.25)EY(19.16)VAT(-19.16)R
0	0.229324	0.309757	0.072707	-0.19147	Y	3	0.996287	0.00195368	91.318	60.429	P09874	634	P09874	P09874	Poly [ADP-ribose] polymerase 1	PARP1	EEKTGNAWHSKNFTKYPKKFYPLEIDYGQDE	24.286	X;X;X;X;X;X;X;X;X;X;X;X;X;X;X;Phospho (STY);X;X;X;X;X;X;X;X;X;X;X;X;X;X;X	XXXXXXXXXXXPPPPPPPXXXXXXXXXXXXX	NFT(0.004)KY(0.996)PK	NFT(-24.29)KY(24.29)PK
0	-0.0549376	-0.123861	0.0244357	-0.193555	Y	3	0.999999	0.000243602	98.943	77.571	Q9C0H5;Q9C0H5-2	394;394	Q9C0H5	Q9C0H5	Rho GTPase-activating protein 39	ARHGAP39	PERFLSLEYSPAGKEYVRQLVYVEQAGSSPK	59.3141	X;X;X;X;X;X;X;X;X;X;X;X;X;X;X;Phospho (STY);X;X;X;X;X;X;X;X;X;X;X;X;X;X;X	XXXPPPPPPPPPPPPPPPXXXXXXXXXXXXX	FLSLEYSPAGKEY(1)VR	FLS(-90.28)LEY(-65.1)S(-59.31)PAGKEY(59.31)VR
0	0.0825899	-0.0740003	-0.174006	-0.193776	Y	3	1	0.000186771	100.69	82.425	Q12931-2;Q12931	264;317	Q12931-2	Q12931-2	Heat shock protein 75 kDa, mitochondrial	TRAP1	DPKDVREWQHEEFYRYVAQAHDKPRYTLHYK	100.687	X;X;X;X;X;X;X;X;X;X;X;X;X;X;X;Phospho (STY);X;X;X;X;X;X;X;X;X;X;X;X;X;X;X	XXXXXXXXXXXXXXXPPPPPPPPPPXXXXXX	Y(1)VAQAHDKPR	Y(100.69)VAQAHDKPR
0	0.135183	0.0390945	-0.252509	-0.195727	Y	3	0.944912	0.000278627	98.156	66.275	Q9NU22	3553	Q9NU22	Q9NU22	Midasin	MDN1	QERIAQEKAEQESGLYRYRSRNSRTALSEEE	12.3436	X;X;X;X;X;X;X;X;X;X;X;X;X;X;X;Phospho (STY);X;X;X;X;X;X;X;X;X;X;X;X;X;X;X	XXXXXXXXPPPPPPPPPPPXXXXXXXXXXXX	AEQESGLY(0.945)RY(0.055)R	AEQES(-54.26)GLY(12.34)RY(-12.34)R
0	-0.191947	-0.214825	-0.111847	-0.196539	Y	3	1	1.1e-09	156.14	127.18	P62258-2;P62258	109;131	P62258-2	P62258-2	14-3-3 protein epsilon	YWHAE	ESKVFYYKMKGDYHRYLAEFATGNDRKEAAE	120.462	X;X;X;X;X;X;X;X;X;X;X;X;X;X;X;Phospho (STY);X;X;X;X;X;X;X;X;X;X;X;X;X;X;X	XXXXXXXXXXXXXXXPPPPPPPPPPPPXXXX	Y(1)LAEFATGNDRK	Y(120.46)LAEFAT(-120.46)GNDRK		yes
0	-0.100648	0.459745	-0.178779	-0.197839	Y	3	1	0.00137274	94.006	66.69	Q9UBU9-2;Q9UBU9	33;33	Q9UBU9-2	Q9UBU9-2	Nuclear RNA export factor 1	NXF1	FPQRKKKGRGPFRWKYGEGNRRSGRGGSGIR	94.0064	X;X;X;X;X;X;X;X;X;X;X;X;X;X;X;Phospho (STY);X;X;X;X;X;X;X;X;X;X;X;X;X;X;X	XXXXXXXXXXXXXPPPPPPPPPXXXXXXXXX	Y(1)GEGNRR	Y(94.01)GEGNRR
0	0.0387351	-0.0477749	-0.317295	-0.201262	Y	2	1	0.00232524	94.669	48.318	P67809	287	P67809	P67809	Nuclease-sensitive element-binding protein 1	YBX1	QGQQPPQRRYRRNFNYRRRRPENPKPQDGKE	58.2458	X;X;X;X;X;X;X;X;X;X;X;X;X;X;X;Phospho (STY);X;X;X;X;X;X;X;X;X;X;X;X;X;X;X	XXXXXXXXXXXXPPPPPPXXXXXXXXXXXXX	NFNY(1)RR	NFNY(58.25)RR
0	-0.334525	0.145745	-0.0662644	-0.20414	Y	2	0.999862	1.49e-12	171.73	136.02	Q9UPZ9-2;Q9UPZ9	159;159	Q9UPZ9-2	Q9UPZ9-2	Serine/threonine-protein kinase ICK	ICK	FGLAREIRSKPPYTDYVSTRWYRAPEVLLRS	40.6748	X;X;X;X;X;X;X;X;X;X;X;X;X;Phospho (STY);X;Phospho (STY);X;X;X;X;X;X;X;X;X;X;X;X;X;X;X	XXXXXXXXPPPPPPPPPPPPXXXXXXXXXXX	SKPPYTDY(1)VSTR	S(-101.92)KPPY(-56.16)T(-40.67)DY(40.67)VS(-43.09)T(-60.42)R
0	0.122592	0.231059	0.0662913	-0.207053	Y	2	0.976055	0.0010648	110.22	76.668	O75494-5;O75494-4;O75494-6;O75494-3;O75494-2;O75494	105;105;105;105;105;105	O75494-5	O75494-5	Serine/arginine-rich splicing factor 10	SRSF10	RKTPNQMKAKEGRNVYSSSRYDDYDRYRRSR	16.1036	X;X;X;X;X;X;X;X;X;X;X;X;X;X;X;Phospho (STY);X;X;X;X;X;X;X;X;X;X;X;X;X;X;X	XXXXXXXXXXXXXPPPPPPPXXXXXXXXXXX	NVY(0.976)S(0.024)SSR	NVY(16.1)S(-16.1)S(-53.04)S(-81.07)R
0	0.0790769	0.10026	0.140264	-0.207619	Y	3	0.827108	4e-27	216.17	198.92	Q9Y5K6	88	Q9Y5K6	Q9Y5K6	CD2-associated protein	CD2AP	ERHGNVASLVQRISTYGLPAGGIQPHPQTKN	6.91975	X;X;X;X;X;X;X;X;X;X;X;X;X;X;X;Phospho (STY);X;X;X;X;X;X;X;X;X;X;X;X;X;X;X	XXXXXXXXXXXXPPPPPPPPPPPPPPPPPPX	IS(0.005)T(0.168)Y(0.827)GLPAGGIQPHPQTK	IS(-22.38)T(-6.92)Y(6.92)GLPAGGIQPHPQT(-188.34)K
0	0.0728685	0.18406	-0.0392222	-0.208901	Y	2	0.996116	0.000166149	128.38	63.137	P04843	185	P04843	P04843	Dolichyl-diphosphooligosaccharide--protein glycosyltransferase subunit 1	RPN1	TQTMRVKLASRNVESYTKLGNPTRSEDLLDY	24.5502	X;X;X;X;X;X;X;X;X;X;X;X;X;X;X;Phospho (STY);X;X;X;X;X;X;X;X;X;X;X;X;X;X;X	XXXXXXXXXXXPPPPPPPXXXXXXXXXXXXX	NVESY(0.996)T(0.003)K	NVES(-34.07)Y(24.55)T(-24.55)K		yes
0	-0.0064286	0.0422384	-0.288217	-0.212304	Y	3	0.999988	0.000698905	93.162	76.199	P35637-2;P35637	238;239	P35637-2	P35637-2	RNA-binding protein FUS	FUS	GGGGGGGGYNRSSGGYEPRGRGGGRGGRGGM	49.2134	X;X;X;X;X;X;X;X;X;X;X;X;X;X;X;Phospho (STY);X;X;X;X;X;X;X;X;X;X;X;X;X;X;X	XXXXXXXXXXXPPPPPPPPPPXXXXXXXXXX	SSGGY(1)EPRGR	S(-64.07)S(-49.21)GGY(49.21)EPRGR
0	0.0109398	0.148332	-0.197599	-0.215887	Y	2	0.999937	0.000462537	110.41	90.418	Q04837	101	Q04837	Q04837	Single-stranded DNA-binding protein, mitochondrial	SSBP1	RISVFRPGLRDVAYQYVKKGSRIYLEGKIDY	42.0252	X;X;X;X;X;X;X;X;X;X;X;X;X;X;X;Phospho (STY);X;X;X;X;X;X;X;X;X;X;X;X;X;X;X	XXXXXXXXXXPPPPPPPPXXXXXXXXXXXXX	DVAYQY(1)VK	DVAY(-42.03)QY(42.03)VK
0	0.0281072	0.0268329	-0.0874382	-0.217477	Y	3	1	0.00141477	94.662	65.513	Q6PJF5-2;Q6PJF5	56;85	Q6PJF5-2	Q6PJF5-2	Inactive rhomboid protein 2	RHBDF2	PGEQDSMLPERKNPAYLKSVSLQEPRSRWQE	94.6624	X;X;X;X;X;X;X;X;X;X;X;X;X;X;X;Phospho (STY);X;X;X;X;X;X;X;X;X;X;X;X;X;X;X	XXXXXXXXXXXPPPPPPPXXXXXXXXXXXXX	KNPAY(1)LK	KNPAY(94.66)LK
0	-0.0692603	0.0651403	0.012982	-0.220386	Y	2	1	1.19e-05	123.96	70.745	Q86VE9-3;Q86VE9-2;Q86VE9;Q86VE9-4	345;345;345;345	Q86VE9-3	Q86VE9-3	Serine incorporator 5	SERINC5	LTSTTRSSSDALQGRYAAPELEIARCCFCFS	123.957	X;X;X;X;X;X;X;X;X;X;X;X;X;X;X;Phospho (STY);X;X;X;X;X;X;X;X;X;X;X;X;X;X;X	XXXXXXXXXXXXXXXPPPPPPPPPPXXXXXX	Y(1)AAPELEIAR	Y(123.96)AAPELEIAR
0	-0.0809913	-0.150039	-0.309466	-0.223549	Y	3	0.997279	1.38e-13	186.46	136.42	Q00535-2;Q00535	15;15	Q00535-2	Q00535-2	Cyclin-dependent kinase 5	CDK5	_MQKYEKLEKIGEGTYGTVFKAKNRETHEIV	25.641	X;X;X;X;X;X;X;X;X;X;X;X;X;X;X;Phospho (STY);X;X;X;X;X;X;X;X;X;X;X;X;X;X;X	XXXXXXXXXXPPPPPPPPPPPXXXXXXXXXX	IGEGT(0.003)Y(0.997)GTVFK	IGEGT(-25.64)Y(25.64)GT(-73.24)VFK		yes
0	-0.221088	-0.167332	-0.270421	-0.225033	Y	3	1	2.18e-18	195.6	156.93	P06493;P06493-2	15;15	P06493	P06493	Cyclin-dependent kinase 1	CDK1	_MEDYTKIEKIGEGTYGVVYKGRHKTTGQVV	74.7101	X;X;X;X;X;X;X;X;X;X;X;X;X;X;Phospho (STY);Phospho (STY);X;X;X;Phospho (STY);X;X;X;X;X;X;X;X;X;X;X	XXXXXXXPPPPPPPPPPPPPPPPXXXXXXXX	IGEGT(1)Y(1)GVVYKGR	IGEGT(108.85)Y(74.71)GVVY(-74.71)KGR
0	0.154356	-0.00139712	-0.036486	-0.225393	Y	3	0.99316	2.49e-05	106.66	92.911	P38159-2;P38159;Q96E39	242;255;255	P38159-2	P38159-2	RNA-binding motif protein, X chromosome;RNA-binding motif protein, X chromosome, N-terminally processed;RNA binding motif protein, X-linked-like-1	RBMX;RBMXL1	DYTYRDYGHSSSRDDYPSRGYSDRDGYGRDR	23.3048	X;X;X;X;X;X;X;X;X;X;X;X;X;X;X;Phospho (STY);X;X;X;X;X;X;X;X;X;X;X;X;X;X;X	XXXXXPPPPPPPPPPPPPPXXXXXXXXXXXX	DYGHSSS(0.002)RDDY(0.993)PS(0.005)R	DY(-79.83)GHS(-60.34)S(-39.56)S(-26.77)RDDY(23.3)PS(-23.3)R
0	-0.0141159	-0.250669	0.156946	-0.226935	Y	3	0.985936	0.000712452	90.614	49.214	Q99704-3;Q99704	310;449	Q99704-3	Q99704-3	Docking protein 1	DOK1	GTATGSGIKSHNSALYSQVQKSGASGSWDCG	23.2286	X;X;X;X;X;X;X;X;X;X;X;X;X;X;X;Phospho (STY);X;X;X;X;X;X;X;X;X;X;X;X;X;X;X	XXXXXXXXXPPPPPPPPPPPPXXXXXXXXXX	S(0.005)HNS(0.005)ALY(0.986)S(0.005)QVQK	S(-23.23)HNS(-23.23)ALY(23.23)S(-23.23)QVQK
0	-0.0671357	-0.152846	0.0670644	-0.229488	Y	2	1	0.000620717	107.74	69.542	O95471	195	O95471	O95471	Claudin-7	CLDN7	ALLSCSCPGNESKAGYRVPRSYPKSNSSKEY	58.6868	X;X;X;X;X;X;X;X;X;X;X;X;X;X;X;Phospho (STY);X;X;X;X;X;X;X;X;X;X;X;X;X;X;X	XXXXXXXXXXXXXPPPPPPPXXXXXXXXXXX	AGY(1)RVPR	AGY(58.69)RVPR
0	-0.240783	0.005394	-0.27618	-0.230666	Y	2	0.933405	0.0291282	45.28	18.182	Q9NRL2-2;Q9NRL2	1262;1294	Q9NRL2-2	Q9NRL2-2	Bromodomain adjacent to zinc finger domain protein 1A	BAZ1A	SSSFSSRGQQQEPGRYPSRSQQSTPKTTVSS	11.4663	X;X;X;X;X;X;X;X;X;X;X;X;X;X;X;Phospho (STY);X;X;X;X;X;X;X;X;X;X;X;X;X;X;X	XXXXXXXPPPPPPPPPPPPXXXXXXXXXXXX	GQQQEPGRY(0.933)PS(0.067)R	GQQQEPGRY(11.47)PS(-11.47)R
0	-0.173722	-0.0450362	0.0612866	-0.231667	Y	2	0.999722	1.84e-10	160.22	122.67	Q9HCK4-2;Q9HCK4;Q9HCK4-3	893;893;909	Q9HCK4-2	Q9HCK4-2	Roundabout homolog 2	ROBO2	IWLYWRRKKRKGLSNYAVTFQRGDGGLMSNG	36.0968	X;X;X;X;X;X;X;X;X;X;X;X;X;X;X;Phospho (STY);X;X;X;X;X;X;X;X;X;X;X;X;X;X;X	XXXXXXXXXXXPPPPPPPPPPPXXXXXXXXX	GLSNY(1)AVTFQR	GLS(-36.1)NY(36.1)AVT(-44.89)FQR
0	-0.259044	-0.0204649	-0.121555	-0.232797	Y	3	0.999979	4.92e-13	166.9	153.57	Q9UM54-6	1146	Q9UM54-6	Q9UM54-6			RNTETEQRAPKSVTDYAQQNPAAQIPARQRE	47.3602	X;X;X;X;X;X;X;X;X;X;X;X;X;X;X;Phospho (STY);X;X;X;X;X;X;X;X;X;X;X;X;X;X;X	XXXXXXXXXXXPPPPPPPPPPPPPPPPPXXX	SVTDY(1)AQQNPAAQIPAR	S(-55.26)VT(-47.36)DY(47.36)AQQNPAAQIPAR
0	0.394581	0.374631	-0.108707	-0.23681	Y	3	0.999398	4.67e-15	189.58	135.83	P62805	73	P62805	P62805	Histone H4	HIST1H4A	VLKVFLENVIRDAVTYTEHAKRKTVTAMDVV	33.1039	X;X;X;X;X;X;X;X;X;X;X;X;X;X;X;Phospho (STY);X;X;X;X;X;X;X;X;X;X;X;Oxidation (M);X;X;X	XXXXXXXXXXXPPPPPPPPPPXXXXXXXXXX	DAVTY(0.999)TEHAK	DAVT(-33.1)Y(33.1)T(-39.48)EHAK
0	0.0553965	0.0309904	-0.0665251	-0.237662	Y	3	1	7.77e-24	215.93	149.22	P29597	292	P29597	P29597	Non-receptor tyrosine-protein kinase TYK2	TYK2	VCHLRLLAQAEGEPCYIRDSGVAPTDPGPES	148.129	X;X;X;X;X;X;X;X;X;X;X;X;X;X;X;Phospho (STY);X;X;X;X;X;X;X;X;X;X;X;X;X;X;X	XXXXXPPPPPPPPPPPPPXXXXXXXXXXXXX	LLAQAEGEPCY(1)IR	LLAQAEGEPCY(148.13)IR
0	0.022764	-0.0136187	-0.184399	-0.238045	Y	3	0.997682	0.00034862	115.71	69.742	O14964-2;O14964	286;286	O14964-2	O14964-2	Hepatocyte growth factor-regulated tyrosine kinase substrate	HGS	QSEAEEKERLRQKSTYTSYPKAEPMPSASSA	31.1435	X;X;X;X;X;X;X;X;X;X;X;X;X;X;X;Phospho (STY);X;X;X;X;X;X;X;X;X;X;X;X;X;X;X	XXXXXXXXXXXPPPPPPPPPPXXXXXXXXXX	S(0.001)T(0.001)Y(0.998)T(0.001)SYPK	S(-31.14)T(-31.14)Y(31.14)T(-31.14)S(-47.44)Y(-66.09)PK		yes
0	-0.922266	-0.753058	-0.668066	-0.238795	Y	3	1	1.04e-05	105.66	92.07	P53801	165	P53801	P53801	Pituitary tumor-transforming gene 1 protein-interacting protein	PTTG1IP	RRAEMKTRHDEIRKKYGLFKEENPYARFENN	73.5004	X;X;X;X;X;X;X;X;X;X;X;X;X;X;X;Phospho (STY);X;X;X;X;X;X;X;X;Phospho (STY);X;X;X;X;X;X	XXXXXXXXXXXXXXXPPPPPPPPPPPPXXXX	Y(1)GLFKEENPYAR	Y(73.5)GLFKEENPY(-73.5)AR
0	-0.163944	-0.0760344	-0.0680344	-0.23902	Y	3	1	3.37e-13	161.21	140.43	Q08345-2;Q08345-6;Q08345;Q08345-5	755;773;792;798	Q08345-2	Q08345-2	Epithelial discoidin domain-containing receptor 1	DDR1	NFTIKIADFGMSRNLYAGDYYRVQGRAVLPI	85.2942	X;X;X;X;X;X;X;X;X;X;X;X;X;X;X;Phospho (STY);X;X;X;Phospho (STY);X;X;X;X;X;X;X;X;X;X;X	XXXXXXXXXXXXXPPPPPPPPPPPPPXXXXX	NLY(1)AGDY(0.995)Y(0.005)RVQGR	NLY(85.29)AGDY(23.4)Y(-23.4)RVQGR
0	-0.174822	-0.487744	-0.310239	-0.240327	Y	2	0.918617	0.00119464	107.59	40.6	O15551	198	O15551	O15551	Claudin-3	CLDN3	SCPPREKKYTATKVVYSAPRSTGPGASLGTG	10.526	X;X;X;X;X;X;X;X;X;X;X;X;X;X;X;Phospho (STY);X;X;X;X;X;X;X;X;X;X;X;X;X;X;X	XXXXXXXXXXXXXPPPPPPPXXXXXXXXXXX	VVY(0.919)S(0.081)APR	VVY(10.53)S(-10.53)APR
0	-0.248237	-0.209334	-0.137513	-0.242691	Y	2	0.999287	4.77e-06	136.99	68.766	Q9NQ84;Q9NQ84-2	324;336	Q9NQ84	Q9NQ84	G-protein coupled receptor family C group 5 member C	GPRC5C	EQSYQGDMYPTRGVGYETILKEQKGQSMFVE	31.4685	X;X;X;X;X;X;X;X;X;X;X;X;X;X;X;Phospho (STY);X;X;X;X;X;X;X;X;X;X;X;X;X;X;X	XXXXXXXXXXXXPPPPPPPPPXXXXXXXXXX	GVGY(0.999)ET(0.001)ILK	GVGY(31.47)ET(-31.47)ILK		yes
0	0.0764784	-0.227323	-0.0344885	-0.246273	Y	3	1	1.93e-13	178.14	164.72	Q9C0H9-2;Q9C0H9;Q9C0H9-5	268;268;396	Q9C0H9-2	Q9C0H9-2	SRC kinase signaling inhibitor 1	SRCIN1	ASKAGGMVLVKGEGLYADPYGLLHEGRLSLA	75.5095	X;X;X;X;X;X;X;X;X;X;X;X;X;X;X;Phospho (STY);X;X;X;X;X;X;X;X;X;X;X;X;X;X;X	XXXXXXXXXXXPPPPPPPPPPPPPPPPXXXX	GEGLY(1)ADPYGLLHEGR	GEGLY(75.51)ADPY(-75.51)GLLHEGR
0	-0.142029	-0.0112106	0.0411738	-0.246676	Y	3	0.786997	0.0313687	44.98	18.597	O95425-2;O95425-4;O95425-3;O95425	567;961;966;993	O95425-2	O95425-2	Supervillin	SVIL	ILNRAREGDSHKESKYAVPRRGSLERANPPI	5.67588	X;X;X;X;X;X;X;X;X;X;X;X;X;X;X;Phospho (STY);X;X;X;X;X;X;X;X;X;X;X;X;X;X;X	XXXXXXXXXXXXPPPPPPPPXXXXXXXXXXX	ES(0.213)KY(0.787)AVPR	ES(-5.68)KY(5.68)AVPR
0	-0.248375	0.212937	-0.333805	-0.254022	Y	2	1	0.000720553	117.18	57.536	P18077	34	P18077	P18077	60S ribosomal protein L35a	RPL35A	RNQREHTALLKIEGVYARDETEFYLGKRCAY	117.177	X;X;X;X;X;X;X;X;X;X;X;X;X;X;X;Phospho (STY);X;X;X;X;X;X;X;X;X;X;X;X;X;X;X	XXXXXXXXXXXPPPPPPPXXXXXXXXXXXXX	IEGVY(1)AR	IEGVY(117.18)AR		yes
0	-0.129595	-0.211887	-0.20414	-0.254055	Y	3	0.999995	4.6e-18	194.86	175.66	Q99959-2;Q99959	119;119	Q99959-2	Q99959-2	Plakophilin-2	PKP2	VPKTYDMLKAGTTATYEGRWGRGTAQYSSQK	53.137	X;X;X;X;X;X;X;X;X;X;X;X;X;X;X;Phospho (STY);X;X;X;X;X;X;X;X;X;X;X;X;X;X;X	XXXXXXXXXPPPPPPPPPPPPPXXXXXXXXX	AGTTATY(1)EGRWGR	AGT(-123.31)T(-109.33)AT(-53.14)Y(53.14)EGRWGR		yes
0	-0.527625	-0.527767	-0.198774	-0.254723	Y	3	0.996206	4.35e-13	159.22	122.04	Q9Y446;Q9Y446-2	176;191	Q9Y446	Q9Y446	Plakophilin-3	PKP3	PVSFHERGGVGSRADYDTLSLRSLRLGPGGL	24.1922	X;X;X;X;X;X;X;X;X;X;X;X;X;X;X;Phospho (STY);X;X;X;X;X;X;X;X;X;X;X;X;X;X;X	XXXXXXXPPPPPPPPPPPPPPPXXXXXXXXX	GGVGSRADY(0.996)DT(0.004)LSLR	GGVGS(-85.38)RADY(24.19)DT(-24.19)LS(-69.71)LR
0	0.40508	-0.0608585	-0.0124938	-0.255086	Y	3	1	0.0355701	42.311	26.939	Q13247-3;Q13247	102;102	Q13247-3	Q13247-3	Serine/arginine-rich splicing factor 6	SRSF6	GGGGYSSRRTSGRDKYGPPVRTEYRLIVENL	42.311	X;X;X;X;X;X;X;X;X;X;X;X;X;X;X;Phospho (STY);X;X;X;X;X;X;X;Phospho (STY);X;X;X;X;X;X;X	XXXXXXXXXXXXXPPPPPPPPXXXXXXXXXX	DKY(1)GPPVR	DKY(42.31)GPPVR
0	-0.255701	0.0301015	-0.194541	-0.257909	Y	3	0.99926	1.16e-05	117.52	94.147	Q9UBU9-2;Q9UBU9	75;75	Q9UBU9-2	Q9UBU9-2	Nuclear RNA export factor 1	NXF1	AMSDAQDGPRVRYNPYTTRPNRRGDTWHDRD	33.6581	X;X;X;X;X;X;X;X;X;X;X;X;X;X;X;Phospho (STY);X;X;X;X;X;X;X;X;X;X;X;X;X;X;X	XXXXXXXXXXXXPPPPPPPPPPXXXXXXXXX	YNPY(0.999)TTRPNR	Y(-35.1)NPY(33.66)T(-33.66)T(-58.45)RPNR
0	-0.0201253	-0.105954	-0.124056	-0.258138	Y	3	0.982225	0.000565101	92.19	59.936	P42338	425	P42338	P42338	Phosphatidylinositol 4,5-bisphosphate 3-kinase catalytic subunit beta isoform	PIK3CB	KVKTKKSTKTINPSKYQTIRKAGKVHYPVAW	17.4241	X;X;X;X;X;X;X;X;X;X;X;X;X;X;X;Phospho (STY);X;X;X;X;X;X;X;X;X;X;X;X;X;X;X	XXXXXXXXXPPPPPPPPPPPPXXXXXXXXXX	Y(0.982)QT(0.018)IRK	Y(17.42)QT(-17.42)IRK
0	-0.17756	-0.15934	-0.255446	-0.260956	Y	3	1	0.0157981	61.593	42.499	Q7Z2E3-13;Q7Z2E3-3;Q7Z2E3-9;Q7Z2E3-11;Q7Z2E3-8;Q7Z2E3-7;Q7Z2E3	55;69;55;69;69;55;69	Q7Z2E3-13	Q7Z2E3-13	Aprataxin	APTX	CSRQQVQLKAECNKGYVKVKQVGVNPTSIDS	61.5934	X;X;X;X;X;X;X;X;X;X;X;X;X;X;X;Phospho (STY);X;X;X;X;X;X;X;X;X;X;X;X;X;X;X	XXXXXXXXXPPPPPPPPPXXXXXXXXXXXXX	AECNKGY(1)VK	AECNKGY(61.59)VK
0	0.401424	-0.0370977	-0.210159	-0.261027	Y	2	0.998233	0.000770395	101.9	79.404	O14974-5;O14974-4;O14974-3;O14974-2;O14974	679;707;710;766;766	O14974-5	O14974-5	Protein phosphatase 1 regulatory subunit 12A	PPP1R12A	EDEYKQKYSRTYDETYQRYRPVSTSSSTTPS	27.52	X;X;X;X;X;X;X;X;X;X;X;X;X;X;X;Phospho (STY);X;X;X;X;X;X;X;X;X;X;X;X;X;X;X	XXXXXXXXXXPPPPPPPPXXXXXXXXXXXXX	TYDET(0.002)Y(0.998)QR	T(-81.61)Y(-70.14)DET(-27.52)Y(27.52)QR
0	-0.0447846	-0.603942	0.0572789	-0.261114	Y	3	0.998806	1.34e-12	171.32	130.59	O96013	208	O96013	O96013	Serine/threonine-protein kinase PAK 4	PAK4	LASGAKLAAGRPFNTYPRADTDHPSRGAQGE	29.2258	X;X;X;X;X;X;X;X;X;X;X;X;X;X;X;Phospho (STY);X;X;X;X;X;X;X;X;X;X;X;X;X;X;X	XXXXXXPPPPPPPPPPPPXXXXXXXXXXXXX	LAAGRPFNT(0.001)Y(0.999)PR	LAAGRPFNT(-29.23)Y(29.23)PR
0	-0.294512	-0.180488	-0.154854	-0.26619	Y	2	1	0.00582226	80.555	12.522	O43752-2;O43752	39;140	O43752-2	O43752-2	Syntaxin-6	STX6	GDSGSQNWSTGTTDKYGRLDRELQRANSHFI	80.5551	X;X;X;X;X;X;X;X;X;X;X;X;X;X;X;Phospho (STY);X;X;X;X;X;X;X;X;X;X;X;X;X;X;X	XXXXXXXXXXXXXXXPPPPPPXXXXXXXXXX	Y(1)GRLDR	Y(80.56)GRLDR
0	-0.0773675	0.0888834	-0.24872	-0.266337	Y	3	0.999038	2.25e-17	200.21	168.61	P38159-2;P38159;Q96E39	212;225;225	P38159-2	P38159-2	RNA-binding motif protein, X chromosome;RNA-binding motif protein, X chromosome, N-terminally processed;RNA binding motif protein, X-linked-like-1	RBMX;RBMXL1	RDDGYSTKDSYSSRDYPSSRDTRDYAPPPRD	30.1662	X;X;X;X;X;Phospho (STY);X;X;X;X;X;X;X;X;X;Phospho (STY);X;X;X;X;X;X;X;X;Phospho (STY);X;X;X;X;X;X	XXXXXXXXPPPPPPPPPPPPXXXXXXXXXXX	DSYSSRDY(0.999)PS(0.001)SR	DS(-150.12)Y(-126.28)S(-126.28)S(-91.21)RDY(30.17)PS(-30.17)S(-73.03)R
0	-0.240495	-0.076586	0.0457183	-0.269566	Y	3	0.999999	5.77e-05	126.07	79.734	Q92665	142	Q92665	Q92665	28S ribosomal protein S31, mitochondrial	MRPS31	KSLEATLGRLRRATEYAPKKRIEPLSPELVA	62.4432	X;X;X;X;X;X;X;X;X;X;X;X;X;X;X;Phospho (STY);X;X;X;X;X;X;X;X;X;X;X;X;X;X;X	XXXXXXXXXXXPPPPPPPPXXXXXXXXXXXX	RATEY(1)APK	RAT(-62.44)EY(62.44)APK
0	-0.114351	0.139322	-0.283552	-0.269949	Y	3	0.993445	0.0178798	57.347	43.947	Q92615	470	Q92615	Q92615	La-related protein 4B	LARP4B	RQAGQTRTRIQNPSAYAKREAGPGRVEPGSL	21.8058	X;X;X;X;X;X;X;X;X;X;X;X;X;X;X;Phospho (STY);X;X;X;X;X;X;X;X;X;X;X;X;X;X;X	XXXXXXXXXPPPPPPPPPPXXXXXXXXXXXX	IQNPS(0.007)AY(0.993)AKR	IQNPS(-21.81)AY(21.81)AKR
0	-0.245943	-0.625014	-0.234499	-0.273729	Y	3	1	0.0148216	60.398	23.054	P80723-2;P80723	12;12	P80723-2	P80723-2	Brain acid soluble protein 1	BASP1	____MGGKLSKKKKGYNVNDEKAKEKDKKAE	60.3978	X;X;X;X;X;X;X;X;X;X;X;X;X;X;X;Phospho (STY);X;X;X;X;X;X;X;X;X;X;X;X;X;X;X	XXXXXXXXXXXXXPPPPPPPPPXXXXXXXXX	KGY(1)NVNDEK	KGY(60.4)NVNDEK		yes
0	-0.279688	-0.391556	-0.345634	-0.274684	Y	2	0.91361	0.028167	64.776	37.46	P46777	30	P46777	P46777	60S ribosomal protein L5	RPL5	RYQVKFRRRREGKTDYYARKRLVIQDKNKYN	10.2512	X;X;X;X;X;X;X;X;X;X;X;X;X;X;X;Phospho (STY);X;X;X;X;X;X;X;X;X;X;X;X;X;X;X	XXXXXXXXXXPPPPPPPPPXXXXXXXXXXXX	TDY(0.914)Y(0.086)AR	T(-37.46)DY(10.25)Y(-10.25)AR		yes
0	-0.377673	-0.286706	-0.409965	-0.275468	Y	3	1	6.3e-18	177.57	77.815	P24941;P24941-2;Q00526	15;15;15	P24941	P24941	Cyclin-dependent kinase 2;Cyclin-dependent kinase 3	CDK2;CDK3	_MENFQKVEKIGEGTYGVVYKARNKLTGEVV	71.0182	X;X;X;X;X;X;X;X;X;X;X;X;X;X;Phospho (STY);Phospho (STY);X;X;X;Phospho (STY);X;X;X;X;X;X;X;X;X;X;X	XXXXXXXPPPPPPPPPPPPPPXXXXXXXXXX	IGEGT(1)Y(1)GVVYK	IGEGT(99.37)Y(71.02)GVVY(-71.02)K
0	-0.352059	-0.00730985	-0.240471	-0.277746	Y	3	1	0.000690171	102.98	72.795	P61927	39	P61927	P61927	60S ribosomal protein L37	RPL37	SKAYHLQKSTCGKCGYPAKRKRKYNWSAKAK	102.98	X;X;X;X;X;X;X;X;X;X;X;X;X;X;X;Phospho (STY);X;X;X;X;X;X;X;X;X;X;X;X;X;X;X	XXXXXXXXXXXXXPPPPPPPXXXXXXXXXXX	CGY(1)PAKR	CGY(102.98)PAKR
0	0.087449	0.17057	0.0835695	-0.282534	Y	3	1	7.2e-18	191.29	169.74	P15529-16;P15529-7;P15529-4;P15529-6;P15529-3;P15529-5;P15529-2	321;340;354;355;369;370;384	P15529-16	P15529-16			LQRRKKKGKADGGAEYATYQTKSTTPAEQRG	66.0721	X;X;X;X;X;X;X;X;X;X;X;X;X;X;X;Phospho (STY);X;X;X;X;X;X;X;X;X;X;X;X;X;X;X	XXXXXXXXXPPPPPPPPPPPPPXXXXXXXXX	ADGGAEY(1)ATYQTK	ADGGAEY(66.07)AT(-66.07)Y(-105.77)QT(-138.92)K
0	-0.00398588	0.0325406	0.0112726	-0.283382	Y	2	1	0.0221506	68.081	19.32	O43795-2;O43795	632;632	O43795-2	O43795-2	Unconventional myosin-Ib	MYO1B	RYLGLLENVRVRRAGYAFRQAYEPCLERYKM	68.0807	X;X;X;X;X;X;X;X;X;X;X;X;X;X;X;Phospho (STY);X;X;X;X;X;X;X;X;X;X;X;X;X;X;X	XXXXXXXXXXXXPPPPPPPXXXXXXXXXXXX	RAGY(1)AFR	RAGY(68.08)AFR		yes
0	0	-0.0657093	-0.28268	-0.283431	Y	2	1	0.000156024	124.83	47.777	Q12929	45	Q12929	Q12929	Epidermal growth factor receptor kinase substrate 8	EPS8	QTDREHGSKTSAKALYEQRKNYARDSVSSVS	96.4916	X;X;X;X;X;X;X;X;X;X;X;X;X;X;X;Phospho (STY);X;X;X;X;X;X;X;X;X;X;X;X;X;X;X	XXXXXXXXXXXXXPPPPPPPXXXXXXXXXXX	ALY(1)EQRK	ALY(96.49)EQRK
0	-0.00439286	0.0929902	-0.218058	-0.288	Y	2	0.998729	8.29e-06	144.09	117.7	Q99569;Q99569-2	421;421	Q99569	Q99569	Plakophilin-4	PKP4	SPDLHITPIYEGRTYYSPVYRSPNHGTVELQ	29.8076	X;X;X;X;X;X;X;X;X;X;X;X;X;X;X;Phospho (STY);X;X;X;X;X;X;X;X;X;X;X;X;X;X;X	XXXXXXXXXXXXXPPPPPPPPXXXXXXXXXX	TYY(0.999)S(0.001)PVYR	T(-53.49)Y(-36.51)Y(29.81)S(-29.81)PVY(-101.01)R
0	-0.0969746	-0.256627	-0.297441	-0.289426	Y	2	0.988738	2.71e-07	141.08	111.71	Q6WCQ1-3;Q6WCQ1;Q6WCQ1-2	267;267;267	Q6WCQ1-3	Q6WCQ1-3	Myosin phosphatase Rho-interacting protein	MPRIP	SDRMDCGRKVRVESGYFSLEKTKQDLKAEEQ	21.5556	X;X;X;X;X;X;X;X;X;X;X;X;X;X;X;Phospho (STY);X;X;X;X;X;X;X;X;X;X;X;X;X;X;X	XXXXXXXXXXXPPPPPPPPPPXXXXXXXXXX	VES(0.004)GY(0.989)FS(0.007)LEK	VES(-23.56)GY(21.56)FS(-21.56)LEK
0	-0.192377	-0.0379499	-0.0849314	-0.291381	Y	3	0.9906	9.32e-08	135.81	123.3	O00571-2;O00571;O15523-2;O15523;O15523-3	53;69;66;69;69	O00571-2	O00571-2	ATP-dependent RNA helicase DDX3X;ATP-dependent RNA helicase DDX3Y	DDX3X;DDX3Y	DKDSSGWSSSKDKDAYSSFGSRSDSRGKSSF	20.4723	X;X;X;X;X;X;X;X;X;X;X;X;X;X;X;Phospho (STY);X;X;X;X;X;X;X;X;X;X;X;X;X;X;X	XXXXXXXXXXXPPPPPPPPPPPXXXXXXXXX	DKDAY(0.991)S(0.009)S(0.001)FGSR	DKDAY(20.47)S(-20.47)S(-32.84)FGS(-102.59)R
0	-0.159442	-0.781424	-0.0321504	-0.292141	Y	3	0.997701	0.0184287	54.787	38.232	Q5FWF4-4;Q5FWF4-2;Q5FWF4-3;Q5FWF4	308;415;950;952	Q5FWF4-4	Q5FWF4-4	DNA annealing helicase and endonuclease ZRANB3;DNA annealing helicase ZRANB3;Endonuclease ZRANB3	ZRANB3	SLKCQEEFWIRSNNSYLRAKVFETEHGVCQL	23.3648	X;X;X;X;X;X;X;X;X;X;X;Phospho (STY);X;X;X;Phospho (STY);X;X;X;X;X;X;X;X;X;X;X;X;X;X;X	XXXXXXXXXXXPPPPPPPXXXXXXXXXXXXX	S(0.501)NNS(0.501)Y(0.998)LR	S(0)NNS(0)Y(23.36)LR
0	-0.196592	-0.234245	-0.0418615	-0.292332	Y	3	0.99998	3.42e-09	169.41	101.04	Q07157-2;Q07157	1281;1361	Q07157-2	Q07157-2	Tight junction protein ZO-1	TJP1	YDPEEDEEYYRKQLSYFDRRSFENKPPAHIA	47.0769	X;X;X;X;X;X;X;X;X;X;X;X;X;X;X;Phospho (STY);X;X;X;X;X;X;X;X;X;X;X;X;X;X;X	XXXXXXXXXXXXPPPPPPPPXXXXXXXXXXX	QLSY(1)FDRR	QLS(-47.08)Y(47.08)FDRR
0	0.00394225	0.14116	-0.119592	-0.293469	Y	3	1	4.81e-14	184.11	149.35	Q9NQS7-2;Q9NQS7	73;73	Q9NQS7-2	Q9NQS7-2	Inner centromere protein	INCENP	KTPSQKNRRKKRRISYVQDENRDPIRRRLSR	72.2096	X;X;X;X;X;X;X;X;X;X;X;X;X;X;Phospho (STY);Phospho (STY);X;X;X;X;X;X;X;X;X;X;X;X;X;X;X	XXXXXXXXXXXXPPPPPPPPPPPPPPPXXXX	RIS(1)Y(1)VQDENRDPIR	RIS(72.21)Y(72.21)VQDENRDPIR
0	-0.306457	-0.453447	-0.402882	-0.294169	Y	3	0.999977	0.000939136	82.651	53.296	P18583-6;P18583-10;P18583-3;P18583-4;P18583-7;P18583;P18583-5;P18583-9	949;949;949;949;909;949;949;989	P18583-6	P18583-6	Protein SON	SON	PYRLGHDAYRLGQDPYRLGHDPYRLTPDPYR	46.3588	X;X;X;X;X;X;X;X;X;X;X;X;X;X;X;Phospho (STY);X;X;X;X;X;X;X;X;X;X;X;X;X;X;X	XXXXXXXXXXPPPPPPPPPPPPPPXXXXXXX	LGQDPY(1)RLGHDPYR	LGQDPY(46.36)RLGHDPY(-46.36)R
0	-0.066426	-0.0857664	-0.163255	-0.29558	Y	2	0.994114	4.49e-09	160.54	124.14	P84103-2;P84103	32;32	P84103-2	P84103-2	Serine/arginine-rich splicing factor 3	SRSF3	LGNNGNKTELERAFGYYGPLRSVWVARNPPG	22.276	X;X;X;X;X;X;X;X;X;X;X;X;X;X;X;Phospho (STY);X;X;X;X;X;X;X;X;X;X;X;X;X;X;X	XXXXXXXXXXXXPPPPPPPPPXXXXXXXXXX	AFGY(0.994)Y(0.006)GPLR	AFGY(22.28)Y(-22.28)GPLR
0	-0.00176084	-0.133776	-0.237978	-0.298368	Y	2	0.993527	0.00175927	108.98	41.698	Q14011;Q14011-3;Q14011-2;Q9BQ75-2;Q9BQ75	142;89;108;85;103	Q14011	Q14011	Cold-inducible RNA-binding protein;Protein CMSS1	CIRBP;CMSS1	RFESRSGGYGGSRDYYSSRSQSGGYSDRSSG	22.1449	X;X;X;X;X;X;X;X;X;X;X;X;X;X;X;Phospho (STY);X;X;X;X;X;X;X;X;X;X;X;X;X;X;X	XXXXXXXXXXXXXPPPPPPXXXXXXXXXXXX	DY(0.006)Y(0.994)SSR	DY(-22.14)Y(22.14)S(-33.85)S(-64.04)R
0	0.16869	0.139734	0.0322138	-0.300866	Y	2	0.999992	0.000531285	107.21	50.028	Q8WWY3	435	Q8WWY3	Q8WWY3	U4/U6 small nuclear ribonucleoprotein Prp31	PRPF31	ISKTLQRTLQKQSVVYGGKSTIRDRSSGTAS	50.7738	X;X;X;X;X;X;X;X;X;X;X;X;X;X;X;Phospho (STY);X;X;X;X;X;X;X;X;X;X;X;X;X;X;X	XXXXXXXXXXXPPPPPPPPXXXXXXXXXXXX	QSVVY(1)GGK	QS(-50.77)VVY(50.77)GGK
0	-0.105503	-0.0579359	-0.243148	-0.301517	Y	3	0.961633	0.000111472	104.82	80.048	Q12866;Q06418	749;681	Q12866	Q12866	Tyrosine-protein kinase Mer;Tyrosine-protein kinase receptor TYRO3	MERTK;TYRO3	DMTVCVADFGLSKKIYSGDYYRQGRIAKMPV	13.9969	X;X;X;X;X;X;X;X;X;X;X;X;X;X;X;Phospho (STY);X;X;X;X;X;X;X;X;X;X;X;X;X;X;X	XXXXXXXXXXXXXPPPPPPPPPXXXXXXXXX	KIY(0.962)S(0.038)GDYYR	KIY(14)S(-14)GDY(-42.36)Y(-60.51)R
0	0.0473183	0.0960966	-0.208157	-0.305052	Y	3	1	9.82e-09	142.83	121.28	P52799	304	P52799	P52799	Ephrin-B2	EFNB2	IIIPLRTADSVFCPHYEKVSGDYGHPVYIVQ	89.3395	X;X;X;X;X;X;X;X;X;X;X;X;X;X;X;Phospho (STY);X;X;X;X;X;X;X;X;X;X;X;X;X;X;X	XXXXXXPPPPPPPPPPPPXXXXXXXXXXXXX	TADSVFCPHY(1)EK	T(-111.87)ADS(-89.34)VFCPHY(89.34)EK
0	-0.287143	-0.104156	-0.226189	-0.306823	Y	3	0.999997	4.08e-15	199.33	159.46	Q9H2X6-2;Q86Z02-2;Q9H2X6-3;Q9H2X6;Q86Z02	361;352;361;361;352	Q9H2X6-2	Q9H2X6-2	Homeodomain-interacting protein kinase 2;Homeodomain-interacting protein kinase 1	HIPK2;HIPK1	DFGSASHVSKAVCSTYLQSRYYRAPEIILGL	55.2375	X;X;X;X;X;X;X;X;X;X;X;X;X;X;X;Phospho (STY);X;X;X;X;X;X;X;X;X;X;X;X;X;X;X	XXXXXXXXXXPPPPPPPPPPXXXXXXXXXXX	AVCSTY(1)LQSR	AVCS(-83.6)T(-55.24)Y(55.24)LQS(-74.9)R
0	-0.0655687	0.122282	-0.105226	-0.308532	Y	3	0.999854	0.0014914	85.67	65.68	Q9UHN6-2;Q9UHN6	27;27	Q9UHN6-2	Q9UHN6-2	Transmembrane protein 2	TMEM2	AFLQPQNGNSRHPSGYVPGKVVPLRPPPPPK	38.3682	X;X;X;X;X;X;X;X;X;X;X;X;X;X;X;Phospho (STY);X;X;X;X;X;X;X;X;X;X;X;X;X;X;X	XXXXXXXXXXXPPPPPPPPPXXXXXXXXXXX	HPSGY(1)VPGK	HPS(-38.37)GY(38.37)VPGK
0	0.0523351	-0.190502	-0.0901419	-0.311247	Y	3	1	0.00165488	91.906	31.118	P52597	219	P52597	P52597	Heterogeneous nuclear ribonucleoprotein F;Heterogeneous nuclear ribonucleoprotein F, N-terminally processed	HNRNPF	VQRPGPYDRPGTARRYIGIVKQAGLERMRPG	91.9062	X;X;X;X;X;X;X;X;X;X;X;X;X;X;X;Phospho (STY);X;X;X;X;X;X;X;X;X;X;X;X;X;X;X	XXXXXXXXXXXXXXPPPPPPPXXXXXXXXXX	RY(1)IGIVK	RY(91.91)IGIVK
0	-0.0626258	0.192898	0.194344	-0.317149	Y	3	1	0.025732	50.966	9.4637	O15031	1231	O15031	O15031	Plexin-B2	PLXNB2	SVYCYWRKSQQAEREYEKIKSQLEGLEESVR	50.9659	X;X;X;X;X;X;X;X;X;X;X;X;X;X;X;Phospho (STY);X;X;X;X;X;X;X;X;X;X;X;X;X;X;X	XXXXXXXXXXXXXXPPPPPPXXXXXXXXXXX	EY(1)EKIK	EY(50.97)EKIK		yes
0	-0.1871	-0.322957	-0.162018	-0.333037	Y	3	0.999995	3.53e-05	124.42	98.305	Q96T37-4;Q96T37-2;Q96T37-3;Q96T37	292;336;336;336	Q96T37-4	Q96T37-4	Putative RNA-binding protein 15	RBM15	PPLPRDLERERDYPFYERVRPAYSLEPRVGA	53.3924	X;X;X;X;X;X;X;X;X;X;X;X;X;X;X;Phospho (STY);X;X;X;X;X;X;X;X;X;X;X;X;X;X;X	XXXXXXXXXPPPPPPPPPXXXXXXXXXXXXX	ERDYPFY(1)ER	ERDY(-53.39)PFY(53.39)ER
0	0.0130587	0.29593	-0.15923	-0.339112	Y	4	1	1.14e-05	104.84	96.923	Q9ULW0;Q9ULW0-2	519;555	Q9ULW0	Q9ULW0	Targeting protein for Xklp2	TPX2	EEDEPVVIKAQPVPHYGVPFKPQIPEARTVE	104.837	X;X;X;X;X;X;X;X;X;X;X;X;X;X;X;Phospho (STY);X;X;X;X;X;X;X;X;X;X;X;X;X;X;X	XXXXXXXXXPPPPPPPPPPPPPPPPPPPXXX	AQPVPHY(1)GVPFKPQIPEAR	AQPVPHY(104.84)GVPFKPQIPEAR
0	-0.503692	-0.203984	-0.208722	-0.339924	Y	2	0.999706	2.1e-13	186.91	141.17	O43781-2;O43781	349;369	O43781-2	O43781-2	Dual specificity tyrosine-phosphorylation-regulated kinase 3	DYRK3	IDFGSSCFEYQKLYTYIQSRFYRAPEIILGS	35.4097	X;X;X;X;X;X;X;X;X;X;X;X;X;X;X;Phospho (STY);X;X;X;X;X;X;X;X;X;X;X;X;X;X;X	XXXXXXXXXXXXPPPPPPPPXXXXXXXXXXX	LYTY(1)IQSR	LY(-51.91)T(-35.41)Y(35.41)IQS(-95.05)R
0	0.23307	0.329442	-0.0642443	-0.340994	Y	2	0.997474	0.0039175	90.37	38.139	Q00839-2;Q00839	308;327	Q00839-2	Q00839-2	Heterogeneous nuclear ribonucleoprotein U	HNRNPU	TMESFAFLWAGGRASYGVSKGKVCFEMKVTE	26.1625	X;X;X;X;X;X;X;X;X;X;X;X;X;X;X;Phospho (STY);X;X;X;X;X;X;X;X;X;X;X;X;X;X;X	XXXXXXXXXXXXXPPPPPPPXXXXXXXXXXX	AS(0.002)Y(0.997)GVSK	AS(-26.16)Y(26.16)GVS(-39.47)K
0	0.117014	0.0927197	-0.132722	-0.343173	Y	2	1	0.00467226	95.957	47.715	P17948-7;P17948-8;P17948-6;P17948-5;P17948	218;236;338;431;1213	P17948-7	P17948-7	Vascular endothelial growth factor receptor 1	FLT1	ISAPKFNSGSSDDVRYVNAFKFMSLERIKTF	95.9572	X;X;X;X;X;X;X;X;X;X;X;X;X;X;X;Phospho (STY);X;X;X;X;X;X;X;X;X;X;X;X;X;X;X	XXXXXXXXXXXXXXXPPPPPPXXXXXXXXXX	Y(1)VNAFK	Y(95.96)VNAFK
0	-0.373785	-0.209407	-0.0288717	-0.34334	Y	3	1	3.43e-15	186.92	149.37	P08621-3;P08621-2;P08621	126;126;126	P08621-3	P08621-3	U1 small nuclear ribonucleoprotein 70 kDa	SNRNP70	NYDTTESKLRREFEVYGPIKRIHMVYSKRSG	53.0339	X;X;X;X;X;X;X;X;X;X;X;X;X;X;X;Phospho (STY);X;X;X;X;X;X;X;X;X;X;X;X;X;X;X	XXXXXXXXXXPPPPPPPPPPPXXXXXXXXXX	REFEVY(1)GPIKR	REFEVY(53.03)GPIKR
0	0.0873022	-0.131075	0.0430138	-0.345799	Y	2	0.988174	1.13e-05	124.39	88.844	Q3V6T2-4;Q3V6T2-2;Q3V6T2-3;Q3V6T2	1770;1771;1798;1799	Q3V6T2-4	Q3V6T2-4	Girdin	CCDC88A	VKESSLSRQSKDSNPYATLPRASSVISTAEG	19.2201	X;X;X;X;X;X;X;X;X;X;X;X;X;X;X;Phospho (STY);X;X;X;X;X;X;X;X;X;X;X;X;X;X;X	XXXXXXXXPPPPPPPPPPPPPXXXXXXXXXX	DSNPY(0.988)AT(0.012)LPR	DS(-64.08)NPY(19.22)AT(-19.22)LPR
0	-0.296588	-0.0403969	-0.43327	-0.347132	Y	3	1	1.66e-09	165.52	111.36	Q01130	115	Q01130	Q01130	Serine/arginine-rich splicing factor 2	SRSF2	HSRRGPPPRRYGGGGYGRRSRSPRRRRRSRS	140.381	X;X;X;X;X;X;X;X;X;X;X;X;X;X;X;Phospho (STY);X;X;X;X;X;X;X;X;X;X;X;X;X;X;X	XXXXXXXXXXPPPPPPPPPXXXXXXXXXXXX	YGGGGY(1)GRR	Y(-140.38)GGGGY(140.38)GRR
0	0.226018	0.0848422	-0.0995763	-0.347354	Y	3	0.937916	0.00994212	66.504	31.011	Q7L7L0;P20671;P04908	40;40;40	Q7L7L0	Q7L7L0	Histone H2A type 3;Histone H2A type 1-D;Histone H2A type 1-B/E	HIST3H2A;HIST1H2AD;HIST1H2AB	QFPVGRVHRLLRKGNYSERVGAGAPVYLAAV	11.7919	X;X;X;X;X;X;X;X;X;X;X;X;X;X;X;Phospho (STY);X;X;X;X;X;X;X;X;X;X;X;X;X;X;X	XXXXXXXXXXXXPPPPPPPXXXXXXXXXXXX	KGNY(0.938)S(0.062)ER	KGNY(11.79)S(-11.79)ER
0	-0.333147	-0.257045	0.0517209	-0.348527	Y	4	0.999993	9.78e-06	118.51	106.8	P52272-2;P52272	64;64	P52272-2	P52272-2	Heterogeneous nuclear ribonucleoprotein M	HNRNPM	RKEKNIKRGGNRFEPYANPTKRYRAFITNIP	51.273	X;X;X;X;X;X;X;X;X;X;X;X;X;X;X;Phospho (STY);X;X;X;X;X;X;X;X;X;X;X;X;X;X;X	XXXXXXXXPPPPPPPPPPPPPPXXXXXXXXX	GGNRFEPY(1)ANPTKR	GGNRFEPY(51.27)ANPT(-51.27)KR
0	0.171743	0.274357	-0.19746	-0.356653	Y	3	0.962744	0.00268893	83.948	43.679	O43293-2;O43293	305;305	O43293-2	O43293-2	Death-associated protein kinase 3	DAPK3	RKPERRRLKTTRLKEYTIKSHSSASPIVAPV	14.1231	X;X;X;X;X;X;X;X;X;X;X;X;X;X;X;Phospho (STY);X;X;X;X;X;X;X;X;X;X;X;X;X;X;X	XXXXXXXXXXXXPPPPPPPXXXXXXXXXXXX	LKEY(0.963)T(0.037)IK	LKEY(14.12)T(-14.12)IK
0	-0.13068	-0.37813	-0.0531948	-0.357515	Y	2	0.804972	1.29e-05	114.72	99.821	P50402	105	P50402	P50402	Emerin	EMD	YNDDYYEESYFTTRTYGEPESAGPSRAVRQS	6.15697	X;X;X;X;X;X;X;X;X;X;X;X;X;X;X;Phospho (STY);X;X;X;X;X;X;X;X;X;X;X;X;X;X;X	XXXXXXXXXXXXXXPPPPPPPPPPPPXXXXX	T(0.195)Y(0.805)GEPESAGPSR	T(-6.16)Y(6.16)GEPES(-51.25)AGPS(-109.84)R		yes
0	0.120465	0.00709951	-0.253366	-0.357728	Y	3	1	0.000131956	128.38	20.638	P49761-2;P49761-3;P49761-1;P49761	36;36;36;184	P49761-2	P49761-2	Dual specificity protein kinase CLK3	CLK3	KRRRSYSREHEGRLRYPSRREPPPRRSRSRS	76.1512	X;X;X;X;X;X;X;X;X;X;X;X;X;X;X;Phospho (STY);X;X;X;X;X;X;X;X;X;X;X;X;X;X;X	XXXXXXXXXXXXXPPPPPPXXXXXXXXXXXX	LRY(1)PSR	LRY(76.15)PS(-76.15)R
0	-0.16608	0.10602	-0.367293	-0.357816	Y	2	1	0.0271646	51.787	15.086	O00571-2;O00571;O15523-2;O15523;O15523-3	244;260;255;258;258	O00571-2	O00571-2	ATP-dependent RNA helicase DDX3X;ATP-dependent RNA helicase DDX3Y	DDX3X;DDX3Y	DGPGEALRAMKENGRYGRRKQYPISLVLAPT	51.7872	X;X;X;X;X;X;X;X;X;X;X;X;X;X;X;Phospho (STY);X;X;X;X;X;Phospho (STY);X;X;X;X;X;X;X;X;X	XXXXXXXXXXXPPPPPPPXXXXXXXXXXXXX	ENGRY(1)GR	ENGRY(51.79)GR
0	-0.524517	-0.39861	-0.195677	-0.359169	Y	2	0.998773	0.000364636	114.97	38.289	Q9NX40	199	Q9NX40	Q9NX40	OCIA domain-containing protein 1	OCIAD1	PDPNLEESPKRKNITYEELRNKNRESYEVSL	29.1065	X;X;X;X;X;X;X;X;X;X;X;X;X;X;X;Phospho (STY);X;X;X;X;X;X;X;X;X;X;X;X;X;X;X	XXXXXXXXXXXXPPPPPPPPXXXXXXXXXXX	NIT(0.001)Y(0.999)EELR	NIT(-29.11)Y(29.11)EELR
0	0.0369524	0.0802968	-0.371828	-0.359642	Y	3	0.999984	2.03e-10	166.14	142.11	Q96RT1-7;Q96RT1-6;Q96RT1-4;Q96RT1-5;Q96RT1-3;Q96RT1-9;Q96RT1-2;Q96RT1;Q96RT1-8	1042;1042;1042;1042;1042;1038;1042;1042;1042	Q96RT1-7	Q96RT1-7	Protein LAP2	ERBB2IP	NMNFSNHNNVRANTAYHLHQRLGPARHGEMW	47.863	X;X;X;X;X;X;X;X;X;X;X;X;X;X;X;Phospho (STY);X;X;X;X;X;X;X;X;X;X;X;X;X;X;X	XXXXXXXXXXXPPPPPPPPPPXXXXXXXXXX	ANTAY(1)HLHQR	ANT(-47.86)AY(47.86)HLHQR		yes
0	0.0125548	-0.0931094	0.0549665	-0.363233	Y	3	0.994132	1.99e-09	161.27	124.89	P08670	11	P08670	P08670	Vimentin	VIM	_____MSTRSVSSSSYRRMFGGPGTASRPSS	22.2926	X;X;X;X;X;X;X;X;X;X;X;X;X;X;X;Phospho (STY);X;X;X;X;X;X;X;X;X;X;X;X;X;X;X	XXXXXXXXXPPPPPPPPPXXXXXXXXXXXXX	SVSSSS(0.006)Y(0.994)RR	S(-152.47)VS(-122.49)S(-94.58)S(-53.57)S(-22.29)Y(22.29)RR
0	-0.0750506	-0.142246	0.00142357	-0.366131	Y	3	1	0.0118799	68.657	59.335	Q9UDY2-4;Q9UDY2-2;Q9UDY2-6;Q9UDY2-3;Q9UDY2;Q9UDY2-7	948;971;1085;1095;1118;1149	Q9UDY2-4	Q9UDY2-4	Tight junction protein ZO-2	TJP2	VQHEEIEIAQKHPDIYAVPIKTHKPDPGTPQ	68.657	X;X;X;X;X;X;X;X;X;X;X;X;X;X;X;Phospho (STY);X;X;X;X;X;X;X;X;X;X;X;X;X;X;X	XXXXXXXXXXXPPPPPPPPPPXXXXXXXXXX	HPDIY(1)AVPIK	HPDIY(68.66)AVPIK
0	-0.271764	-0.181911	-0.222791	-0.372354	Y	2	1	0.00203814	88.495	53.2	Q9HCK4-2;Q9HCK4;Q9HCK4-3	1176;1176;1192	Q9HCK4-2	Q9HCK4-2	Roundabout homolog 2	ROBO2	MQPMLQAHLDELTRAYQFDIAKQTW______	88.4955	X;X;X;X;X;X;X;X;X;X;X;X;X;X;X;Phospho (STY);X;X;X;X;X;X;X;X;X;X;X;X;X;X;X	XXXXXXXXXXXXXXPPPPPPPPXXXXXXXXX	AY(1)QFDIAK	AY(88.5)QFDIAK
0	0.0359774	0.185716	-0.00805686	-0.372448	Y	3	0.867543	0.00152703	93.374	49.566	Q8TEW8-6;Q8TEW8-3;Q8TEW8-2;Q8TEW8;Q8TEW8-5	964;964;971;1033;932	Q8TEW8-6	Q8TEW8-6	Partitioning defective 3 homolog B	PARD3B	PTGGSTDRIQKLRKEYYQARREGFPLYEDDE	8.16214	X;X;X;X;X;X;X;X;X;X;X;X;X;X;X;Phospho (STY);X;X;X;X;X;X;X;X;X;X;X;X;X;X;X	XXXXXXXXXXXXXPPPPPPPXXXXXXXXXXX	KEY(0.868)Y(0.132)QAR	KEY(8.16)Y(-8.16)QAR
0	-0.479305	-0.168924	-0.299644	-0.372974	Y	3	0.999995	2.46e-21	221.59	152.31	Q9H422-2;Q9H422	359;359	Q9H422-2	Q9H422-2	Homeodomain-interacting protein kinase 3	HIPK3	DFGSASHVSKTVCSTYLQSRYYRAPEIILGL	53.2512	X;X;X;X;X;X;X;X;X;X;X;X;X;X;X;Phospho (STY);X;X;X;X;X;X;X;X;X;X;X;X;X;X;X	XXXXXXXXXXPPPPPPPPPPXXXXXXXXXXX	TVCSTY(1)LQSR	T(-118.25)VCS(-92.01)T(-53.25)Y(53.25)LQS(-71.1)R
0	-0.249154	-0.908725	-0.819697	-0.373065	Y	3	0.999961	0.00188268	97.64	62.935	P16989-3;P16989;P16989-2	333;333;264	P16989-3	P16989-3	Y-box-binding protein 3	YBX3	SGPNQPSVRRGYRRPYNYRRRPPSS______	44.1187	X;X;X;X;X;X;X;X;X;X;X;X;X;X;X;Phospho (STY);X;X;X;X;X;X;X;X;X;X;X;X;X;X;X	XXXXXXXXXXXXXPPPPPPXXXXXXXXXXXX	RPY(1)NYR	RPY(44.12)NY(-44.12)R
0	0.182772	0.215583	-0.10619	-0.374719	Y	3	0.930055	2.82e-05	111.57	102.1	P09651-3;P09651-2;P09651	252;305;357	P09651-3	P09651-3	Heterogeneous nuclear ribonucleoprotein A1	HNRNPA1	GGGGQYFAKPRNQGGYGGSSSSSSYGSGRRF	18.2178	X;X;X;X;X;X;X;X;X;X;X;X;X;X;X;Phospho (STY);X;X;X;X;X;X;X;X;X;X;X;X;X;X;X	XXXXXXXXXXXPPPPPPPPPPPPPPPPPPXX	NQGGY(0.93)GGS(0.014)S(0.004)S(0.009)S(0.006)S(0.011)S(0.008)Y(0.013)GS(0.005)GR	NQGGY(18.22)GGS(-18.22)S(-24.07)S(-19.99)S(-21.64)S(-19.3)S(-20.75)Y(-18.46)GS(-23.08)GR
0	-0.251543	-0.274951	-0.349155	-0.389084	Y	3	0.999999	1.28e-08	156.48	112.67	P10721-2;P10721	605;609	P10721-2	P10721-2	Mast/stem cell growth factor receptor Kit	KIT	TLGAGAFGKVVEATAYGLIKSDAAMTVAVKM	59.7357	X;X;X;X;X;X;X;X;X;X;X;X;X;X;X;Phospho (STY);X;X;X;X;X;X;X;X;X;X;X;X;X;X;X	XXXXXXXXXPPPPPPPPPPPXXXXXXXXXXX	VVEATAY(1)GLIK	VVEAT(-59.74)AY(59.74)GLIK
0	0.130128	0.165868	0.183045	-0.390251	Y	3	0.929695	9.66e-06	120.71	106.24	Q13151	180	Q13151	Q13151	Heterogeneous nuclear ribonucleoprotein A0	HNRNPA0	GHRVEVKKAVPKEDIYSGGGGGGSRSSRGGR	11.2135	X;X;X;X;X;X;X;X;X;X;X;X;X;X;X;Phospho (STY);X;X;X;X;X;X;X;X;X;X;X;X;X;X;X	XXXXXXXXPPPPPPPPPPPPPPPPPXXXXXX	AVPKEDIY(0.93)S(0.07)GGGGGGSR	AVPKEDIY(11.21)S(-11.21)GGGGGGS(-69.22)R
0	-0.220692	-0.200721	-0.247017	-0.390777	Y	2	0.999963	0.000735033	116.88	102.1	Q6ZW49-2;Q6ZW49-1;Q6ZW49	491;704;738	Q6ZW49-2	Q6ZW49-2	PAX-interacting protein 1	PAXIP1	DLKLMAYLAGAKYTGYLCRSNTVLICKEPTG	46.8854	X;X;X;X;X;X;X;X;X;X;X;X;X;X;X;Phospho (STY);X;X;X;X;X;X;X;X;X;X;X;X;X;X;X	XXXXXXXXXXXXPPPPPPPXXXXXXXXXXXX	YTGY(1)LCR	Y(-46.89)T(-47.71)GY(46.89)LCR
0	-0.00895071	0.299076	-0.501372	-0.398779	Y	3	0.995169	0.000269721	104.44	80.669	Q8TDD1;Q8TDD1-2	763;763	Q8TDD1	Q8TDD1	ATP-dependent RNA helicase DDX54	DDX54	KKKIKTESGRYISSSYKRDLYQKWKQKQKID	23.1407	X;X;X;X;X;X;X;X;X;X;X;X;X;X;X;Phospho (STY);X;X;X;X;X;X;X;X;X;X;X;X;X;X;X	XXXXXXXXXXPPPPPPPPXXXXXXXXXXXXX	YISSS(0.005)Y(0.995)KR	Y(-99.23)IS(-76.57)S(-56.73)S(-23.14)Y(23.14)KR
0	0.219998	0.0106755	-0.00865679	-0.398786	Y	3	0.999992	2e-06	123.51	114.03	Q07666-3;Q07666-2;Q07666;Q5VWX1	404;418;443;349	Q07666-3	Q07666-3	KH domain-containing, RNA-binding, signal transduction-associated protein 1;KH domain-containing, RNA-binding, signal transduction-associated protein 2	KHDRBS1;KHDRBS2	ARPVKGAYREHPYGRY_______________	51.1926	X;X;X;X;X;X;X;X;X;X;X;X;X;X;X;Phospho (STY);X;X;X;X;X;X;X;X;X;X;X;X;X;X;X	XXXXXPPPPPPPPPPPXXXXXXXXXXXXXXX	GAYREHPYGRY(1)	GAY(-122.14)REHPY(-51.19)GRY(51.19)
0	-0.0890399	-0.304739	-0.36061	-0.405784	Y	3	1	0.0027113	74.92	61.52	O60927	64	O60927	O60927	Protein phosphatase 1 regulatory subunit 11	PPP1R11	DNEHMGRRSSKCCCIYEKPRAFGESSTESDE	74.9199	X;X;X;X;X;X;X;X;X;X;X;X;X;X;X;Phospho (STY);X;X;X;X;X;X;X;X;X;X;X;X;X;X;X	XXXXXXXXXXXPPPPPPPPPXXXXXXXXXXX	CCCIY(1)EKPR	CCCIY(74.92)EKPR
0	0.0501654	0.00784637	0.0990891	-0.40968	Y	3	0.951409	0.000768577	90.306	74.152	Q08211	148	Q08211	Q08211	ATP-dependent RNA helicase A	DHX9	GVPGPTWDRGANLKDYYSRKEEQEVQATLES	12.9478	X;X;X;X;X;X;X;X;X;X;X;X;X;X;X;Phospho (STY);X;X;X;X;X;X;X;X;X;X;X;X;X;X;X	XXXXXXXXXPPPPPPPPPPXXXXXXXXXXXX	GANLKDY(0.951)Y(0.048)SR	GANLKDY(12.95)Y(-12.95)S(-34.59)R
0	-0.179834	-0.1279	-0.105355	-0.411662	Y	4	0.997276	6.54e-06	125.22	92.421	Q07157-2;Q07157	1452;1532	Q07157-2	Q07157-2	Tight junction protein ZO-1	TJP1	QKTVTPAYNRFTPKPYTSSARPFERKFESPK	29.1096	X;X;X;X;X;X;X;Phospho (STY);X;X;X;X;X;X;X;Phospho (STY);X;X;X;X;X;X;X;X;X;X;X;X;X;X;X	XXXXXXXXXXPPPPPPPPPPPPPPPXXXXXX	FTPKPY(0.997)T(0.001)S(0.001)SARPFER	FT(-36.36)PKPY(29.11)T(-29.11)S(-29.11)S(-43.44)ARPFER
0	-0.21194	-0.0551475	-0.288983	-0.422041	Y	2	0.759438	0.0145028	53.351	25.177	P07910-4;P07910-2;P07910;P07910-3	126;126;139;59	P07910-4	P07910-4	Heterogeneous nuclear ribonucleoproteins C1/C2	HNRNPC	LDYDFQRDYYDRMYSYPARVPPPPPIARAIK	5.50289	X;X;X;X;X;X;X;X;X;X;X;X;Oxidation (M);X;X;Phospho (STY);X;X;X;X;X;X;X;X;X;X;X;X;X;X;X	XXXXXXXXXXXXPPPPPPPXXXXXXXXXXXX	MY(0.027)S(0.214)Y(0.759)PAR	MY(-14.55)S(-5.5)Y(5.5)PAR
0	-0.31354	-0.189065	-0.494541	-0.423301	Y	2	0.996919	0.00120255	94.692	77.461	Q14247-3;Q14247;Q14247-2	154;154;154	Q14247-3	Q14247-3	Src substrate cortactin	CTTN	FEYQGKTEKHASQKDYSSGFGGKYGVQADRV	26.0351	X;X;X;X;X;X;X;X;X;X;X;X;X;X;X;Phospho (STY);X;X;X;X;X;X;X;X;X;X;X;X;X;X;X	XXXXXXXXXXXXXXPPPPPPPPPXXXXXXXX	DY(0.997)S(0.002)S(0.001)GFGGK	DY(26.04)S(-26.04)S(-32.23)GFGGK
0	-0.165941	0.11674	-0.4632	-0.428973	Y	2	0.997455	0.000810742	93.649	16.97	Q12834	152	Q12834	Q12834	Cell division cycle protein 20 homolog	CDC20	PQNAPEGYQNRLKVLYSQKATPGSSRKTCRY	25.9324	X;X;X;X;X;X;X;X;X;X;X;X;X;X;X;Phospho (STY);X;X;X;X;X;X;X;X;X;X;X;X;X;X;X	XXXXXXXXXXXPPPPPPPPXXXXXXXXXXXX	VLY(0.997)S(0.003)QK	VLY(25.93)S(-25.93)QK
0	-0.152036	-0.025417	-0.229401	-0.431845	Y	2	0.983437	0.0434402	54.765	15.743	P36578	184	P36578	P36578	60S ribosomal protein L4	RPL4	LLLKKLKAWNDIKKVYASQRMRAGKGKMRNR	17.7362	X;X;X;X;X;X;X;X;X;X;X;X;X;X;X;Phospho (STY);X;X;X;X;X;X;X;X;X;X;X;X;X;X;X	XXXXXXXXXXXXXXPPPPPPXXXXXXXXXXX	VY(0.983)AS(0.017)QR	VY(17.74)AS(-17.74)QR
0	0.199921	0.194815	-0.212604	-0.435389	Y	2	0.991346	0.019608	66.27	17.847	Q4VCS5	25	Q4VCS5	Q4VCS5	Angiomotin	AMOT	GGTTVLQRLLQEQLRYGNPSENRSLLAIHQQ	20.5901	X;X;X;X;X;X;X;X;X;X;X;X;X;X;X;Phospho (STY);X;X;X;X;X;X;X;X;X;X;X;X;X;X;X	XXXXXXXXXXXXXXXPPPPPPPPXXXXXXXX	Y(0.991)GNPS(0.009)ENR	Y(20.59)GNPS(-20.59)ENR		yes
0	0.0281264	0.116914	0.00257999	-0.440815	Y	2	1	9.97e-09	147.62	126.58	Q14511-2;Q14511-3;Q14511	92;92;92	Q14511-2	Q14511-2	Enhancer of filamentation 1;Enhancer of filamentation 1 p55	NEDD9	PASGLMQQTFGQQKLYQVPNPQAAPRDTIYQ	147.623	X;X;X;X;X;X;X;X;X;X;X;X;X;X;X;Phospho (STY);X;X;X;X;X;X;X;X;X;X;X;X;X;X;X	XXXXXXXXXXXXXXPPPPPPPPPPPPXXXXX	LY(1)QVPNPQAAPR	LY(147.62)QVPNPQAAPR
0	-0.387048	-0.177898	-0.112019	-0.445281	Y	2	0.953416	4.88e-06	150.17	125.18	P33993-3;P33993	424;600	P33993-3	P33993-3	DNA replication licensing factor MCM7	MCM7	YVEMRREAWASKDATYTSARTLLAILRLSTA	15.6959	X;X;X;X;X;X;X;X;X;X;X;X;X;X;X;Phospho (STY);X;X;X;X;X;X;X;X;X;X;X;X;X;X;X	XXXXXXXXXXXXPPPPPPPPXXXXXXXXXXX	DAT(0.021)Y(0.953)T(0.026)SAR	DAT(-16.59)Y(15.7)T(-15.7)S(-54.43)AR
0	-0.449748	-0.289713	-0.621173	-0.446864	Y	2	1	1.36e-07	141.27	131.62	Q9UPY5	15	Q9UPY5	Q9UPY5	Cystine/glutamate transporter	SLC7A11	_MVRKPVVSTISKGGYLQGNVNGRLPSLGNK	141.266	X;X;X;X;X;X;X;X;X;X;X;X;X;X;X;Phospho (STY);X;X;X;X;X;X;X;X;X;X;X;X;X;X;X	XXXXXXXXXXXXXPPPPPPPPPPPXXXXXXX	GGY(1)LQGNVNGR	GGY(141.27)LQGNVNGR
0	-0.217188	-0.00178783	-0.239917	-0.460353	Y	2	1	1.98e-07	157.97	116.54	Q8IZR5-3;Q8IZR5-2;Q8IZR5	158;187;187	Q8IZR5-3	Q8IZR5-3	CKLF-like MARVEL transmembrane domain-containing protein 4	CMTM4	VQKWRVSVRQQSTNDYIRARTESRDVDSRPE	79.8734	X;X;X;X;X;X;X;X;X;X;X;X;X;X;X;Phospho (STY);X;X;X;X;X;X;X;X;X;X;X;X;X;X;X	XXXXXXXXXPPPPPPPPPXXXXXXXXXXXXX	QQSTNDY(1)IR	QQS(-91.4)T(-79.87)NDY(79.87)IR
0	-0.0954844	-0.125342	-0.124084	-0.470659	Y	2	0.991425	0.000760377	116.37	45.238	P46939-3;P46939-4;P46939;P46939-2	388;1111;3197;3202	P46939-3	P46939-3	Utrophin	UTRN	SPQLFHDDTHSRIEQYATRLAQMERTNGSFL	20.6302	X;X;X;X;X;X;X;X;X;X;X;X;X;X;X;Phospho (STY);X;X;X;X;X;X;X;X;X;X;X;X;X;X;X	XXXXXXXXXXXXPPPPPPPXXXXXXXXXXXX	IEQY(0.991)AT(0.009)R	IEQY(20.63)AT(-20.63)R		yes
0	-0.0791331	-0.0333534	-0.0913856	-0.47186	Y	2	1	1.81e-27	227.92	200.92	Q96GP6-2;Q96GP6	623;628	Q96GP6-2	Q96GP6-2	Scavenger receptor class F member 2	SCARF2	SERSASSVEGPGGALYARVARREARPARARG	163.577	X;X;X;X;X;X;X;X;X;X;X;X;X;X;X;Phospho (STY);X;X;X;X;X;X;X;X;X;X;X;X;X;X;X	XXXPPPPPPPPPPPPPPPXXXXXXXXXXXXX	SASSVEGPGGALY(1)AR	S(-188.68)AS(-169.06)S(-163.58)VEGPGGALY(163.58)AR
0	-0.362726	-0.245385	-0.203663	-0.472716	Y	3	0.999956	0.00145052	75.589	66.69	O43155	588	O43155	O43155	Leucine-rich repeat transmembrane protein FLRT2	FLRT2	TSQKWKYNRGRRKDDYCEAGTKKDNSILEMT	43.5998	X;X;X;X;X;X;X;X;X;X;X;X;X;X;X;Phospho (STY);X;X;X;X;X;X;X;X;X;X;X;X;X;X;X	XXXXXXXXXXXPPPPPPPPPPPXXXXXXXXX	RKDDY(1)CEAGTK	RKDDY(43.6)CEAGT(-43.6)K
0	-0.0265282	0.0481185	-0.351659	-0.476844	Y	3	0.999995	1.39e-46	295.37	261.53	P09651-3;P09651-2;P09651	236;289;341	P09651-3	P09651-3	Heterogeneous nuclear ribonucleoprotein A1	HNRNPA1	GPMKGGNFGGRSSGPYGGGGQYFAKPRNQGG	52.9625	X;X;X;X;X;X;X;X;X;X;X;X;X;X;X;Phospho (STY);X;X;X;X;X;X;X;X;X;X;X;X;X;X;X	XXXXXXXXXXXPPPPPPPPPPPPPPPPXXXX	SSGPY(1)GGGGQYFAKPR	S(-64.52)S(-52.96)GPY(52.96)GGGGQY(-140)FAKPR
0	-0.135904	-0.13628	-0.26107	-0.481965	Y	3	0.999965	3.19e-37	244.74	223.43	Q96RT1-7;Q96RT1-6;Q96RT1-4;Q96RT1-5;Q96RT1-3;Q96RT1-9;Q96RT1-2;Q96RT1;Q96RT1-8	1104;1104;1104;1104;1104;1100;1104;1104;1104	Q96RT1-7	Q96RT1-7	Protein LAP2	ERBB2IP	GDPGSTRRAQIPEGDYLSYREFHSAGRTPPM	44.6176	X;X;X;X;X;X;X;X;X;X;X;X;X;X;X;Phospho (STY);X;X;X;X;X;X;X;X;X;X;X;X;X;X;X	XXXXXXXPPPPPPPPPPPPPPPPPPPPXXXX	AQIPEGDY(1)LSYREFHSAGR	AQIPEGDY(44.62)LS(-44.62)Y(-69.53)REFHS(-95.48)AGR		yes
0	-0.195102	0.0867998	-0.0316661	-0.483429	Y	3	0.999888	8.42e-08	135.02	120.34	Q96PK6	645	Q96PK6	Q96PK6	RNA-binding protein 14	RBM14	KSSLDYRRLPDAHSDYARYSGSYNDYLRAAQ	39.5106	X;X;X;X;X;X;X;X;X;X;X;X;X;X;X;Phospho (STY);X;X;X;X;X;X;X;X;X;X;X;X;X;X;X	XXXXXXXPPPPPPPPPPPXXXXXXXXXXXXX	RLPDAHSDY(1)AR	RLPDAHS(-39.51)DY(39.51)AR
0	-0.266927	0.0582571	-0.151673	-0.484628	Y	2	0.978793	0.00106988	110.12	55.004	Q9UKB1-2;Q9UKB1-3;Q9UKB1;Q9Y297-2;Q9Y297	505;526;539;566;602	Q9UKB1-2	Q9UKB1-2	F-box/WD repeat-containing protein 11;F-box/WD repeat-containing protein 1A	FBXW11;BTRC	PSAQNETRSPSRTYTYISR____________	17.6451	X;X;X;X;X;X;X;X;X;X;X;X;X;X;X;Phospho (STY);X;X;X;X;X;X;X;X;X;X;X;X;X;X;X	XXXXXXXXXXXXPPPPPPPXXXXXXXXXXXX	TY(0.004)T(0.017)Y(0.979)ISR	T(-38.4)Y(-23.64)T(-17.65)Y(17.65)IS(-58.38)R
0	-0.303865	-0.145221	-0.466833	-0.48819	Y	3	0.999622	0.0273929	48.467	38.546	P29597	827	P29597	P29597	Non-receptor tyrosine-protein kinase TYK2	TYK2	EAPLQSRSPSEKEHFYQRQHRLPEPSCPQLA	36.0236	X;X;X;X;X;X;X;X;X;X;X;X;X;X;X;Phospho (STY);X;X;X;X;X;X;X;X;X;X;X;X;X;X;X	XXXXXXXPPPPPPPPPPPXXXXXXXXXXXXX	SPSEKEHFY(1)QR	S(-38.92)PS(-36.02)EKEHFY(36.02)QR
0	-0.0744587	0.4545	-0.183232	-0.498773	Y	4	0.999882	9.55e-05	108.7	80.492	P34741	191	P34741	P34741	Syndecan-2	SDC2	EGSYDLGERKPSSAAYQKAPTKEFYA_____	39.6353	X;X;X;X;X;X;X;X;X;X;X;X;X;X;X;Phospho (STY);X;X;X;X;X;X;X;X;X;X;X;X;X;X;X	XXXXXXXXXPPPPPPPPPPPPPXXXXXXXXX	KPSSAAY(1)QKAPTK	KPS(-52.31)S(-39.64)AAY(39.64)QKAPT(-54.14)K
0	-0.105813	0.152376	-0.502783	-0.503786	Y	3	0.99956	5.95e-09	148.89	136.97	P42684-2;P42684-6;P42684-3;P42684;P42684-8;P42684-4;P42684-7;P42684-10;P42684-5;P00519;P00519-2	403;418;424;439;418;403;418;424;439;393;412	P42684-2	P42684-2	Abelson tyrosine-protein kinase 2;Tyrosine-protein kinase ABL1	ABL2;ABL1	KVADFGLSRLMTGDTYTAHAGAKFPIKWTAP	35.1963	X;X;X;X;X;X;X;X;X;X;Oxidation (M);X;X;X;X;Phospho (STY);X;X;X;X;X;X;X;X;X;X;X;X;X;X;X	XXXXXXXXXPPPPPPPPPPPPPPXXXXXXXX	LMTGDTY(1)TAHAGAK	LMT(-53.62)GDT(-35.2)Y(35.2)T(-38.74)AHAGAK
0	0.314667	-0.0997234	-0.341665	-0.503925	Y	2	0.996995	0.00289262	95.741	72.218	Q99569;Q99569-2	465;465	Q99569	Q99569	Plakophilin-4	PKP4	IGNLQRTSSQRSTLTYQRNNYALNTTATYAE	25.2166	X;X;X;X;X;X;X;X;X;X;X;X;X;X;X;Phospho (STY);X;X;X;X;Phospho (STY);X;X;X;X;X;X;X;Phospho (STY);X;X	XXXXXXXXXXXPPPPPPPXXXXXXXXXXXXX	STLT(0.003)Y(0.997)QR	S(-58.59)T(-54.02)LT(-25.22)Y(25.22)QR
0	-0.221221	-0.17183	-0.392339	-0.515377	Y	3	0.968163	0.00153325	74.987	61.474	Q9UPX8-4;Q9UPX8;Q9UPX8-3	394;610;989	Q9UPX8-4	Q9UPX8-4	SH3 and multiple ankyrin repeat domains protein 2	SHANK2	QANFRNKRGQMPENPYSEVGKIASKAVYVPA	14.8302	X;X;X;X;X;X;X;X;X;X;Oxidation (M);X;X;X;X;Phospho (STY);X;X;X;X;X;X;X;X;X;X;X;X;X;X;X	XXXXXXXXPPPPPPPPPPPPPXXXXXXXXXX	GQMPENPY(0.968)S(0.032)EVGK	GQMPENPY(14.83)S(-14.83)EVGK
0	-0.351728	-0.378	-0.363688	-0.518962	Y	3	0.999838	1.8e-19	192.64	168.13	Q9NYB9-3;Q9NYB9-2;Q9NYB9-4;Q9NYB9	162;207;207;213	Q9NYB9-3	Q9NYB9-3	Abl interactor 2	ABI2	YRTLEPVRPPVVPNDYVPSPTRNMAPSQQSP	37.9179	Phospho (STY);X;X;X;X;X;X;X;X;X;X;X;X;X;X;Phospho (STY);X;X;X;X;X;X;X;X;X;X;X;X;X;X;X	PPPPPPPPPPPPPPPPPPPPPPXXXXXXXXX	TLEPVRPPVVPNDY(1)VPSPTR	T(-131.37)LEPVRPPVVPNDY(37.92)VPS(-37.92)PT(-65.83)R
0	-0.287793	-0.276612	-0.0322185	-0.520641	Y	3	0.999929	6.66e-09	158.05	124.96	P38159-2;P38159	322;335	P38159-2	P38159-2	RNA-binding motif protein, X chromosome;RNA-binding motif protein, X chromosome, N-terminally processed	RBMX	YGGSRDSYSSSRSDLYSSGRDRVGRQERGLP	41.5005	X;X;X;X;X;X;X;X;X;X;X;X;X;X;X;Phospho (STY);X;X;X;X;X;X;X;X;X;X;X;X;X;X;X	XXXXXXXXXXXXPPPPPPPPPPXXXXXXXXX	SDLY(1)SSGRDR	S(-64.95)DLY(41.5)S(-41.5)S(-79.71)GRDR
0	-0.130556	-0.394054	-0.366669	-0.524817	Y	2	0.977614	0.00187992	107.43	7.3631	Q70E73	667	Q70E73	Q70E73	Ras-associated and pleckstrin homology domains-containing protein 1	RAPH1	QSAPSAGSAAPMFVKYSTITRLQNASQHSGA	17.756	X;X;X;X;X;X;X;X;X;X;X;X;X;X;X;Phospho (STY);X;X;X;X;X;X;X;X;X;X;X;X;X;X;X	XXXXXXXXXXXXXXXPPPPPPXXXXXXXXXX	Y(0.978)S(0.016)T(0.006)ITR	Y(17.76)S(-17.76)T(-22.12)IT(-80.37)R
0	-0.337528	-0.315129	-0.429198	-0.52658	Y	3	0.861283	0.015123	56.29	38.551	O00571-2;O00571	88;104	O00571-2	O00571-2	ATP-dependent RNA helicase DDX3X	DDX3X	GSGSRGRFDDRGRSDYDGIGSRGDRSGFGKF	9.58559	X;X;X;X;X;X;X;X;X;X;X;X;X;X;X;Phospho (STY);X;X;X;X;X;X;X;X;X;X;X;X;X;X;X	XXXXXXXXXXXPPPPPPPPPPPPPPXXXXXX	GRS(0.095)DY(0.861)DGIGS(0.044)RGDR	GRS(-9.59)DY(9.59)DGIGS(-12.92)RGDR
0	0.164469	-0.232561	-0.15554	-0.529284	Y	2	0.999993	1.91e-05	137.9	100.81	Q4VCS5	118	Q4VCS5	Q4VCS5	Angiomotin	AMOT	NEELPTYEEAKVQSQYFRGQQHASVGAAFYV	51.4319	X;X;X;X;X;X;X;X;X;X;X;X;X;X;X;Phospho (STY);X;X;X;X;X;X;X;X;X;X;X;X;X;X;X	XXXXXXXXXXXPPPPPPPXXXXXXXXXXXXX	VQSQY(1)FR	VQS(-51.43)QY(51.43)FR		yes
0	-0.241364	-0.0996128	-0.108354	-0.531506	Y	3	0.999962	0.0377928	49.3	39.645	Q92922	66	Q92922	Q92922	SWI/SNF complex subunit SMARCC1	SMARCC1	QLDSVRVWLGKHYKKYVHADAPTNKTLAGLV	44.2021	X;X;X;X;X;X;X;X;X;X;X;X;X;X;X;Phospho (STY);X;X;X;X;X;X;X;X;X;X;X;X;X;X;X	XXXXXXXXXXXXXXXPPPPPPPPPPXXXXXX	Y(1)VHADAPTNK	Y(44.2)VHADAPT(-44.2)NK
0	0.172673	0.234134	-0.11992	-0.532507	Y	2	0.996604	0.00213768	104.11	48.085	Q69YH5	83	Q69YH5	Q69YH5	Cell division cycle-associated protein 2	CDCA2	TPESFVRNSAGKSSSYLKKCRRRSAVGARGS	24.717	X;X;X;X;X;X;X;X;X;X;X;X;X;X;X;Phospho (STY);X;X;X;X;X;X;X;X;X;X;X;X;X;X;X	XXXXXXXXXXXXPPPPPPPXXXXXXXXXXXX	SSS(0.003)Y(0.997)LKK	S(-48.39)S(-47.54)S(-24.72)Y(24.72)LKK
0	-0.323781	-0.114486	-0.602533	-0.546571	Y	2	1	0.00120474	116.12	53.685	P38159-2;P38159	344;357	P38159-2	P38159-2	RNA-binding motif protein, X chromosome;RNA-binding motif protein, X chromosome, N-terminally processed	RBMX	VGRQERGLPPSMERGYPPPRDSYSSSSRGAP	116.122	X;X;X;X;X;X;X;X;X;X;X;X;X;X;X;Phospho (STY);X;X;X;X;X;X;X;X;X;X;X;X;X;X;X	XXXXXXXXXXXXXXPPPPPPXXXXXXXXXXX	GY(1)PPPR	GY(116.12)PPPR
0	-0.0668747	-0.123829	-0.711141	-0.5482	Y	2	1	0.00165173	76.282	60.667	Q6P9H4	499	Q6P9H4	Q6P9H4	Connector enhancer of kinase suppressor of ras 3	CNKSR3	FSRPTTERHLVRGADYIRGSRCYINSDLHSS	66.9935	X;X;X;X;X;X;X;X;X;X;X;X;X;X;X;Phospho (STY);X;X;X;X;X;X;X;X;X;X;X;X;X;X;X	XXXXXXXXXXXXPPPPPPPPPXXXXXXXXXX	GADY(1)IR	GADY(66.99)IR
0	-0.223357	-0.256303	-0.447985	-0.56384	Y	3	0.999991	7.17e-14	179.58	159.14	Q99569;Q99569-2	470;470	Q99569	Q99569	Plakophilin-4	PKP4	RTSSQRSTLTYQRNNYALNTTATYAEPYRPI	50.3883	X;X;X;X;X;X;X;X;X;X;Phospho (STY);X;X;X;X;Phospho (STY);X;X;X;X;X;X;X;X;X;X;X;X;X;X;X	XXXXXXXXXXXXXPPPPPPPPPPPPPPPPPP	NNY(1)ALNTTATYAEPYRPIQYR	NNY(50.39)ALNT(-50.39)T(-71.14)AT(-96.82)Y(-117.58)AEPY(-155.23)RPIQY(-172.77)R
0	-0.0319774	-0.0940206	-0.301465	-0.566373	Y	2	0.803947	1.06e-08	146.96	126.18	Q16625-5;Q16625-4;Q16625-2;Q16625-3;Q16625	46;117;314;368;368	Q16625-5	Q16625-5	Occludin	OCLN	ELPLTSPVDDFRQPRYSSGGNFETPSKRAPA	6.13481	X;X;X;X;X;X;X;X;X;X;X;X;X;X;X;Phospho (STY);X;X;X;X;X;X;X;X;X;X;X;X;X;X;X	XXXXXXXXXXXXXXXPPPPPPPPPPPPXXXX	Y(0.804)S(0.196)SGGNFETPSK	Y(6.13)S(-6.13)S(-34.54)GGNFET(-115.89)PS(-131.64)K		yes
0	0.306033	-0.0370284	0.158114	-0.580039	Y	3	1	7.18e-11	181.53	122.18	Q6NYC8-2;Q6NYC8	230;230	Q6NYC8-2	Q6NYC8-2	Phostensin	PPP1R18	RRKEVESRLSPGESAYQKLGLTEAHKWRPDS	74.8051	X;X;X;X;X;X;X;X;X;X;X;X;X;X;X;Phospho (STY);X;X;X;X;X;X;X;X;X;X;X;X;X;X;X	XXXXXXXXPPPPPPPPPPXXXXXXXXXXXXX	LSPGESAY(1)QK	LS(-111.64)PGES(-74.81)AY(74.81)QK
0	-0.716404	-0.190897	-0.989159	-0.585953	Y	4	0.861899	0.0213233	45.68	23.549	Q96I24	523	Q96I24	Q96I24	Far upstream element-binding protein 3	FUBP3	QPQSSQPNYSKAWEDYYKKQSHAASAAPQAS	7.95258	X;X;X;X;X;X;X;X;X;X;X;X;X;X;X;Phospho (STY);X;X;X;X;X;X;X;X;X;X;X;X;X;X;X	XXXXXXXXXXXPPPPPPPPXXXXXXXXXXXX	AWEDY(0.862)Y(0.138)KK	AWEDY(7.95)Y(-7.95)KK
0	-0.021129	0.0796092	-0.414275	-0.587733	Y	3	0.888874	1.18e-08	155.97	132.51	Q12866;Q06418	753;685	Q12866	Q12866	Tyrosine-protein kinase Mer;Tyrosine-protein kinase receptor TYRO3	MERTK;TYRO3	CVADFGLSKKIYSGDYYRQGRIAKMPVKWIA	9.03376	X;X;X;X;X;X;X;X;X;X;X;X;X;X;X;Phospho (STY);X;X;X;X;X;X;X;X;X;X;X;X;X;X;X	XXXXXXXXXPPPPPPPPPPPPXXXXXXXXXX	KIYSGDY(0.889)Y(0.111)R	KIY(-47.71)S(-40.75)GDY(9.03)Y(-9.03)R
0	-0.299389	-0.30936	-0.389807	-0.591058	Y	3	0.994518	0.000752988	93.839	42.773	Q9UJU6-5;Q9UJU6-4;Q9UJU6;Q9UJU6-2;Q9UJU6-3	37;45;140;140;140	Q9UJU6-5	Q9UJU6-5	Drebrin-like protein	DBNL	PECIMEKVAKASGANYSFHKESGRFQDVGPQ	22.6861	X;X;X;X;X;X;X;X;X;X;X;X;X;X;X;Phospho (STY);X;X;X;X;X;X;X;X;X;X;X;X;X;X;X	XXXXXXXXXXPPPPPPPPPPXXXXXXXXXXX	ASGANY(0.995)S(0.005)FHK	AS(-39.06)GANY(22.69)S(-22.69)FHK
0	0.269312	0.122376	0.373682	-0.592899	Y	3	0.999721	5.79e-18	195.77	176.67	P49023-2;P49023;P49023-3	118;118;118	P49023-2	P49023-2	Paxillin	PXN	SVGSPCSRVGEEEHVYSFPNKQKSAEPSPTV	35.5488	X;X;X;X;X;X;X;X;X;X;X;X;X;X;X;Phospho (STY);X;X;X;X;X;X;X;X;X;X;X;X;X;X;X	XXXXXXXXPPPPPPPPPPPPPXXXXXXXXXX	VGEEEHVY(1)SFPNK	VGEEEHVY(35.55)S(-35.55)FPNK		yes
0	-0.278329	-0.229566	-0.583155	-0.602707	Y	2	0.998867	0.00112445	109.01	80.906	Q5T0W9	336	Q5T0W9	Q5T0W9	Protein FAM83B	FAM83B	NLFGRQDKIHKLDSSYFKNRGIYTLNEHDKY	29.5438	X;X;X;X;X;X;X;X;X;X;X;X;X;X;X;Phospho (STY);X;X;X;X;X;X;X;X;X;X;X;X;X;X;X	XXXXXXXXXXXPPPPPPPXXXXXXXXXXXXX	LDSS(0.001)Y(0.999)FK	LDS(-46.3)S(-29.54)Y(29.54)FK
0	0.362469	0.0523593	0.157563	-0.603414	Y	2	0.999993	1.13e-05	138.78	71.986	Q07157-2;Q07157	1444;1524	Q07157-2	Q07157-2	Tight junction protein ZO-1	TJP1	PVNGTEQTQKTVTPAYNRFTPKPYTSSARPF	51.6038	X;X;X;X;X;X;X;X;X;X;X;X;X;X;X;Phospho (STY);X;X;X;X;X;X;X;Phospho (STY);X;X;X;X;X;X;X	XXXXXXXXXXPPPPPPPPXXXXXXXXXXXXX	TVTPAY(1)NR	T(-107.03)VT(-51.6)PAY(51.6)NR
0	-0.261674	0.0069594	-0.23093	-0.612734	Y	3	1	0.000481865	92.039	79.073	Q13573	176	Q13573	Q13573	SNW domain-containing protein 1	SNW1	AAMPVRAADKLAPAQYIRYTPSQQGVAFNSG	92.0388	X;X;X;X;X;X;X;X;X;X;X;X;X;X;X;Phospho (STY);X;X;X;X;X;X;X;X;X;X;X;X;X;X;X	XXXXXXPPPPPPPPPPPPXXXXXXXXXXXXX	AADKLAPAQY(1)IR	AADKLAPAQY(92.04)IR
0	-0.0562128	0.0663505	-0.0977641	-0.617115	Y	2	0.865038	1.19e-05	137.69	96.81	P40189-3;P40189	844;905	P40189-3	P40189-3	Interleukin-6 receptor subunit beta	IL6ST	TVGMEAATDEGMPKSYLPQTVRQGGYMPQ__	8.06824	X;X;X;X;X;X;X;X;X;X;X;X;X;X;X;Phospho (STY);X;X;X;X;X;X;X;X;X;X;X;X;X;X;X	XXXXXXXXXXXXXXPPPPPPPPXXXXXXXXX	S(0.135)Y(0.865)LPQTVR	S(-8.07)Y(8.07)LPQT(-78.95)VR
0	0.0414501	-0.0925946	-0.371282	-0.625915	Y	4	0.905774	1.52e-14	173.86	163.5	Q9NYB9-3;Q9NYB9-2;Q9NYB9-4;Q9NYB9	147;192;192;198	Q9NYB9-3	Q9NYB9-3	Abl interactor 2	ABI2	SPPMSGKGTLGRHSPYRTLEPVRPPVVPNDY	12.4027	X;X;X;X;X;X;X;X;X;X;X;X;X;X;X;Phospho (STY);X;X;X;X;X;X;X;X;X;X;X;X;X;X;Phospho (STY)	XXXXXXXXXXXXPPPPPPPPPPPPPPPPPPP	HS(0.042)PY(0.906)RT(0.052)LEPVRPPVVPNDYVPSPTR	HS(-13.32)PY(12.4)RT(-12.4)LEPVRPPVVPNDY(-126.74)VPS(-143.66)PT(-147.65)R
0	-0.168157	-0.0924607	-0.374882	-0.63999	Y	3	0.878281	0.0162224	61.161	48.53	Q14247-3;Q14247;Q14247-2	191;191;191	Q14247-3	Q14247-3	Src substrate cortactin	CTTN	FDYQGKTEKHESQRDYSKGFGGKYGIDKDKV	8.58274	X;X;X;X;X;X;X;X;X;X;X;X;X;X;X;Phospho (STY);X;X;X;X;X;X;X;X;X;X;X;X;X;X;X	XXXXXXXXXXXXXXPPPPPPPPPXXXXXXXX	DY(0.878)S(0.122)KGFGGK	DY(8.58)S(-8.58)KGFGGK
0	-0.0359355	-0.425326	-0.113203	-0.642133	Y	3	1	9.25e-22	227.27	197.52	Q9NRA8-2;Q9NRA8;Q9NRA8-3	405;580;580	Q9NRA8-2	Q9NRA8-2	Eukaryotic translation initiation factor 4E transporter	EIF4ENIF1	PPLSQVFQTRAASADYLRPRIPSPIGFTPGP	110.253	X;X;X;X;X;X;X;X;X;X;X;X;X;X;X;Phospho (STY);X;X;X;X;X;X;X;X;X;X;X;X;X;X;X	XXXXXXXXXXPPPPPPPPPPXXXXXXXXXXX	AASADY(1)LRPR	AAS(-110.25)ADY(110.25)LRPR
0	-0.129608	-0.111402	-0.268565	-0.644256	Y	4	0.831812	0.000335435	96.113	83.95	Q86V81	77	Q86V81	Q86V81	THO complex subunit 4	ALYREF	ARGAAGGGGRNRPAPYSRPKQLPDKWQHDLF	6.9423	X;X;X;X;X;X;X;X;X;X;X;X;X;X;X;Phospho (STY);X;X;X;X;X;X;X;X;X;X;X;X;X;X;X	XXXXXXXXXXPPPPPPPPPPXXXXXXXXXXX	NRPAPY(0.832)S(0.168)RPK	NRPAPY(6.94)S(-6.94)RPK
0	-0.313341	0.131511	-0.429931	-0.671375	Y	3	0.975798	0.000970189	85.813	66.681	O75369-7;O75369-6;O75369-3;O75369-2;O75369-9;O75369;O75369-8	2322;2437;2461;2478;2491;2502;2533	O75369-7	O75369-7	Filamin-B	FLNB	SILVESVTRSSTETCYSAIPKASSDASKVTS	16.0921	X;X;X;X;X;X;X;X;X;X;X;X;X;X;X;Phospho (STY);X;X;X;X;X;X;X;X;X;X;X;X;X;X;X	XXXXXXXXXPPPPPPPPPPPPXXXXXXXXXX	SSTETCY(0.976)S(0.024)AIPK	S(-50.78)S(-50.78)T(-51.38)ET(-37.29)CY(16.09)S(-16.09)AIPK
0	-0.12582	-0.0725392	-0.252765	-0.671792	Y	3	1	1.75e-05	108.58	91.917	Q12929;Q12929-2	525;265	Q12929	Q12929	Epidermal growth factor receptor kinase substrate 8	EPS8	AVAFKPTSNRHIDRNYEPLKTQPKKYAKSKY	108.564	X;X;X;X;X;X;X;X;X;X;X;X;X;X;X;Phospho (STY);X;X;X;X;X;X;X;X;X;X;X;X;X;X;X	XXXXXXXXXXPPPPPPPPPPPPPPXXXXXXX	HIDRNY(1)EPLK	HIDRNY(108.56)EPLK
0	-0.168012	-0.100644	-0.126772	-0.675421	Y	4	0.994268	2.03e-36	259.14	230.59	O60716-13;O60716-11;O60716-10;O60716-9;O60716-5;O60716-3;O60716-2;O60716;O60716-16;O60716-15;O60716-14;O60716-12;O60716-8;O60716-7;O60716-6;O60716-4	42;42;42;42;96;96;96;96;42;42;42;42;96;96;96;96	O60716-13	O60716-13	Catenin delta-1	CTNND1	SDLKLNGPQDHSHLLYSTIPRMQEPGQIVET	23.1508	X;X;X;X;X;X;X;X;X;X;X;X;X;X;X;Phospho (STY);X;X;X;X;X;X;X;X;X;X;X;X;X;X;X	XXXXPPPPPPPPPPPPPPPPPXXXXXXXXXX	LNGPQDHSHLLY(0.994)S(0.005)T(0.001)IPR	LNGPQDHS(-77.83)HLLY(23.15)S(-23.15)T(-30.34)IPR		yes
0	-0.576058	-0.242554	-0.382961	-0.681545	Y	3	1	0.00173509	90.986	59.05	Q9NQS3-3	479	Q9NQS3-3	Q9NQS3-3	Poliovirus receptor-related protein 3	PVRL3	RSPGKHHQNNDPKRVYIDPREHYV_______	90.9856	X;X;X;X;X;X;X;X;X;X;X;X;X;X;X;Phospho (STY);X;X;X;X;X;X;X;X;X;X;X;X;X;X;X	XXXXXXXXXXXXXPPPPPPPXXXXXXXXXXX	RVY(1)IDPR	RVY(90.99)IDPR
0	-0.445861	-0.338048	-0.289919	-0.688232	Y	3	0.999996	3.06e-13	164.53	119.6	Q86YV5	413	Q86YV5	Q86YV5	Tyrosine-protein kinase SgK223	SGK223	QPPAHPREATQPEPIYAESTKRKKAAPVPSK	54.0855	X;X;X;X;X;X;X;X;X;X;X;X;X;X;X;Phospho (STY);X;X;X;X;X;X;X;X;X;X;X;X;X;X;X	XXXXXXXPPPPPPPPPPPPPPPXXXXXXXXX	EATQPEPIY(1)AESTKR	EAT(-67.33)QPEPIY(54.09)AES(-54.09)T(-67.45)KR
0	-0.23043	-0.333929	-0.4082	-0.71263	Y	2	0.999999	3.16e-12	167.73	150.49	Q13480;Q13480-2	406;406	Q13480	Q13480	GRB2-associated-binding protein 1	GAB1	VDLNKLRKDASSQDCYDIPRAFPSDRSSSLE	61.1271	X;X;X;X;X;X;X;X;X;X;X;X;X;X;X;Phospho (STY);X;X;X;X;X;X;X;X;X;X;X;X;X;X;X	XXXXXXXPPPPPPPPPPPPPXXXXXXXXXXX	DASSQDCY(1)DIPR	DAS(-75.94)S(-61.13)QDCY(61.13)DIPR
0	-0.170779	-0.223882	-0.340553	-0.723519	Y	2	0.999796	5.14e-14	197.27	167.5	P08069;P06213-2;P06213	1165;1177;1189	P08069	P08069	Insulin-like growth factor 1 receptor;Insulin-like growth factor 1 receptor alpha chain;Insulin-like growth factor 1 receptor beta chain;Insulin receptor;Insulin receptor subunit alpha;Insulin receptor subunit beta	IGF1R;INSR	KIGDFGMTRDIYETDYYRKGGKGLLPVRWMS	36.908	X;X;X;X;X;X;X;X;X;X;X;X;X;X;X;Phospho (STY);X;X;X;X;X;X;X;X;X;X;X;X;X;X;X	XXXXXXXXXPPPPPPPPPXXXXXXXXXXXXX	DIYETDY(1)YR	DIY(-100.32)ET(-64.14)DY(36.91)Y(-36.91)R		yes
0	-0.273132	-0.193806	-0.415049	-0.725491	Y	2	1	1.54e-07	138.89	86.405	P00533	1197	P00533	P00533	Epidermal growth factor receptor	EGFR	KPNGIFKGSTAENAEYLRVAPQSSEFIGA__	113.88	X;X;X;X;X;X;X;X;X;X;X;X;X;X;X;Phospho (STY);X;X;X;X;X;X;X;X;X;X;X;X;X;X;X	XXXXXXXPPPPPPPPPPPXXXXXXXXXXXXX	GSTAENAEY(1)LR	GS(-127.31)T(-113.88)AENAEY(113.88)LR
0	-0.390334	-0.242144	-0.510705	-0.738305	Y	3	0.986387	1.08e-27	232.84	206.55	Q15262;Q15262-2;Q15262-3;Q15262-4	858;859;859;875	Q15262	Q15262	Receptor-type tyrosine-protein phosphatase kappa	PTPRK	LLDVPRYLCEGTESPYQTGQLHPAIRVADLL	18.601	X;X;X;X;X;X;X;X;X;X;X;X;X;X;X;Phospho (STY);X;X;X;X;X;X;X;X;X;X;X;X;X;X;X	XXXXXXPPPPPPPPPPPPPPPPPPPPXXXXX	YLCEGTES(0.014)PY(0.986)QTGQLHPAIR	Y(-100.05)LCEGT(-66.35)ES(-18.6)PY(18.6)QT(-63.58)GQLHPAIR		yes
0	-0.0213878	0.062426	-0.0350727	-0.741014	Y	2	0.991798	0.0064267	81.613	66.115	Q07666-3;Q07666-2;Q07666;Q5VWX1	401;415;440;346	Q07666-3	Q07666-3	KH domain-containing, RNA-binding, signal transduction-associated protein 1;KH domain-containing, RNA-binding, signal transduction-associated protein 2	KHDRBS1;KHDRBS2	APPARPVKGAYREHPYGRY____________	20.8252	X;X;X;X;X;X;X;X;X;X;X;X;X;X;X;Phospho (STY);X;X;X;X;X;X;X;X;X;X;X;X;X;X;X	XXXXXXXXPPPPPPPPPPPXXXXXXXXXXXX	EHPY(0.992)GRY(0.008)	EHPY(20.83)GRY(-20.83)
0	0.0239371	-0.0818963	-0.173348	-0.752073	Y	2	1	3.55e-17	192.18	166.2	Q8TEW0-5;Q8TEW0-3;Q8TEW0-7;Q8TEW0-6;Q8TEW0-4;Q8TEW0-11;Q8TEW0-2;Q8TEW0	968;990;997;1034;1043;1064;1077;1080	Q8TEW0-5	Q8TEW0-5	Partitioning defective 3 homolog	PARD3	AKTREFRERQARERDYAEIQDFHRTFGCDDE	155.386	X;X;X;X;X;X;X;X;X;X;X;X;X;X;X;Phospho (STY);X;X;X;X;X;X;X;X;X;X;X;X;X;X;X	XXXXXXXXXXXXPPPPPPPPPPPPXXXXXXX	ERDY(1)AEIQDFHR	ERDY(155.39)AEIQDFHR
0	-0.128273	-0.279674	-0.195112	-0.756427	Y	2	0.999882	4.99e-11	179.35	155.98	Q9NWQ8	227	Q9NWQ8	Q9NWQ8	Phosphoprotein associated with glycosphingolipid-enriched microdomains 1	PAG1	ELPGPQTEGKAEFAEYASVDRNKKCRQSVNV	39.2665	X;X;X;X;X;X;X;X;X;X;X;X;X;X;X;Phospho (STY);X;X;X;X;X;X;X;X;X;X;X;X;X;X;X	XXXXXXXXXXPPPPPPPPPPPXXXXXXXXXX	AEFAEY(1)ASVDR	AEFAEY(39.27)AS(-39.27)VDR
0	-0.558865	0.280395	-0.559224	-0.768708	Y	3	0.996247	1.14e-19	194.67	178.53	Q8IZP0-2;Q8IZP0-4;Q8IZP0-3;Q8IZP0-5;Q8IZP0-6;Q8IZP0-9;Q8IZP0-12;Q8IZP0	300;305;306;301;305;306;350;333	Q8IZP0-2	Q8IZP0-2	Abl interactor 1	ABI1	ISRHNSTTSSTSSGGYRRTPSVTAQFSAQPH	24.2443	X;X;X;X;X;X;X;X;X;X;X;X;X;X;X;Phospho (STY);X;X;X;X;X;X;X;X;X;X;X;X;X;X;X	XXXPPPPPPPPPPPPPPPXXXXXXXXXXXXX	HNSTTSSTSS(0.004)GGY(0.996)RR	HNS(-126.26)T(-118.29)T(-103.35)S(-96.6)S(-89.79)T(-74.89)S(-54.64)S(-24.24)GGY(24.24)RR		yes
0	0.0565406	-0.0417991	-0.299489	-0.777897	Y	3	1	0.0335195	40.883	35.785	P50395-2;P50395	397;442	P50395-2	P50395-2	Rab GDP dissociation inhibitor beta	GDI2	SEFDFEEMKRKKNDIYGED____________	40.8832	X;X;X;X;X;X;X;X;X;X;X;X;X;X;X;Phospho (STY);X;X;X;X;X;X;X;X;X;X;X;X;X;X;X	XXXXXXXXXXPPPPPPPPPXXXXXXXXXXXX	KKNDIY(1)GED	KKNDIY(40.88)GED		yes
0	0.118394	-0.0673891	0.0793234	-0.794746	Y	3	0.999949	4.07e-13	166.57	146.81	P62136-3;P62136;P62136-2	262;306;317	P62136-3	P62136-3	Serine/threonine-protein phosphatase PP1-alpha catalytic subunit	PPP1CA	CSFQILKPADKNKGKYGQFSGLNPGGRPITP	42.9352	X;X;X;X;X;X;X;X;X;X;X;X;X;X;X;Phospho (STY);X;X;X;X;X;X;X;X;X;X;X;X;X;X;X	XXXXXXXXXXXXXPPPPPPPPPPPPPPPPPP	Y(1)GQFSGLNPGGRPITPPR	Y(42.94)GQFS(-42.94)GLNPGGRPIT(-149.72)PPR
0	0.0933505	-0.0918804	-0.39904	-0.795764	Y	2	0.99711	0.00386958	98.418	35.27	P55196-1;P55196;P55196-5	1697;1714;1724	P55196-1	P55196-1	Afadin	MLLT4	PAPGAPPPPPQRNASYLKTQVLSPDSLFTAK	25.3791	X;X;X;X;X;X;X;X;X;X;X;X;X;X;X;Phospho (STY);X;X;X;X;X;X;X;X;X;X;X;X;X;X;X	XXXXXXXXXXXXPPPPPPXXXXXXXXXXXXX	NAS(0.003)Y(0.997)LK	NAS(-25.38)Y(25.38)LK		yes
0	0.196585	0.026565	-0.0300786	-0.799105	Y	3	1	0.000549232	90.861	83.294	Q9Y490	436	Q9Y490	Q9Y490	Talin-1	TLN1	EDSVSPKKSTVLQQQYNRVGKVEHGSVALPA	78.5058	X;X;X;X;X;X;X;X;X;X;X;X;X;X;X;Phospho (STY);X;X;X;X;X;X;X;X;X;X;X;X;X;X;X	XXXXXXXPPPPPPPPPPPXXXXXXXXXXXXX	KSTVLQQQY(1)NR	KS(-81.04)T(-78.51)VLQQQY(78.51)NR		yes
0	0.0455385	-0.274221	-0.182872	-0.805488	Y	2	1	7.31e-05	127.02	102.15	Q14444-2;Q14444	670;670	Q14444-2	Q14444-2	Caprin-1	CAPRIN1	QFSAPRDYSGYQRDGYQQNFKRGSGQSGPRG	91.0872	X;X;X;X;X;X;X;X;X;X;X;X;X;X;X;Phospho (STY);X;X;X;X;X;X;X;X;X;X;X;X;X;X;X	XXXXXXXXXXXXXPPPPPPPPXXXXXXXXXX	DGY(1)QQNFK	DGY(91.09)QQNFK
0	-0.145964	0.177569	-0.435189	-0.806524	Y	2	0.99998	3.09e-05	131.3	80.265	P48634-2;P48634-3;P48634	1003;1015;1015	P48634-2	P48634-2	Protein PRRC2A	PRRC2A	NGNLSPAPRLRRDYSYERVGPTSCRGRGRGE	46.9425	X;X;X;X;X;X;X;X;X;X;X;X;X;X;X;Phospho (STY);X;X;X;X;X;X;X;X;X;X;X;X;X;X;X	XXXXXXXXXXXXPPPPPPXXXXXXXXXXXXX	DYSY(1)ER	DY(-74.41)S(-46.94)Y(46.94)ER
0	0.231855	-0.158449	0.243537	-0.807132	Y	2	0.999778	3.31e-21	214.64	169.04	P07947;P06241-3;P06241-2;P06241;P06239;P06239-3;P12931;P12931-2	426;365;417;420;394;424;419;425	P07947;P12931	P07947	Tyrosine-protein kinase Yes;Tyrosine-protein kinase Fyn;Tyrosine-protein kinase Lck;Proto-oncogene tyrosine-protein kinase Src	YES1;FYN;LCK;SRC	KIADFGLARLIEDNEYTARQGAKFPIKWTAP;KVADFGLARLIEDNEYTARQGAKFPIKWTAP	36.541	X;X;X;X;X;X;X;X;X;X;X;X;X;X;X;Phospho (STY);X;X;X;X;X;X;X;X;X;X;X;X;X;X;X	XXXXXXXXXPPPPPPPPPPPPPPXXXXXXXX	LIEDNEY(1)TAR	LIEDNEY(36.54)T(-36.54)AR		yes
0	-0.16954	-0.328408	-0.444932	-0.822092	Y	3	0.986089	1.41e-05	111.94	81.207	Q7Z2W4-3;Q7Z2W4-2;Q7Z2W4	299;299;299	Q7Z2W4-3	Q7Z2W4-3	Zinc finger CCCH-type antiviral protein 1	ZC3HAV1	SLEDAPVDDLTRKFTYLGSQDRARPPSGSSK	18.591	X;X;X;X;X;X;X;X;X;X;X;X;X;X;X;Phospho (STY);X;X;X;X;X;X;X;X;X;X;X;X;X;X;X	XXXXXXXXXXXXPPPPPPPPPPXXXXXXXXX	KFT(0.014)Y(0.986)LGSQDR	KFT(-18.59)Y(18.59)LGS(-35.6)QDR		yes
0	-0.562047	-0.397673	-0.632276	-0.822154	Y	3	1	3.95e-13	164.53	148.54	Q96J84-3;Q96J84;Q96J84-2	522;625;641	Q96J84-3	Q96J84-3	Kin of IRRE-like protein 1	KIRREL	AHEDRPSSRAVLYADYRAPGPARFDGRPSSR	63.0971	X;X;X;X;X;X;X;X;X;X;X;X;X;X;X;Phospho (STY);X;X;X;X;X;X;X;X;X;X;X;X;X;X;X	XXXXXXXXXPPPPPPPPPPPPPPXXXXXXXX	AVLYADY(1)RAPGPAR	AVLY(-63.1)ADY(63.1)RAPGPAR
0	-0.261504	-0.0814937	-0.119318	-0.830661	Y	4	0.997233	5.09e-20	205.78	188.06	Q15375-2;Q15375-4;Q15375	786;787;791	Q15375-2	Q15375-2	Ephrin type-A receptor 7	EPHA7	DFGLSRVIEDDPEAVYTTTGGKIPVRWTAPE	25.6786	X;X;X;X;X;X;X;X;X;X;X;X;X;X;X;Phospho (STY);X;X;X;X;X;X;X;X;X;X;X;X;X;X;X	XXXXXXPPPPPPPPPPPPPPPPPPPPXXXXX	VIEDDPEAVY(0.997)T(0.003)TTGGKIPVR	VIEDDPEAVY(25.68)T(-25.68)T(-42.37)T(-49.1)GGKIPVR		yes
0	-0.409831	-0.475102	-0.652251	-0.849369	Y	2	0.993114	0.00314222	76.825	38.674	P37802;P37802-2	8;29	P37802	P37802	Transgelin-2	TAGLN2	________MANRGPAYGLSREVQQKIEKQYD	21.5901	X;X;X;X;X;X;X;X;X;X;X;X;X;X;X;Phospho (STY);X;X;X;X;X;X;X;X;X;X;X;X;X;X;X	XXXXXXXXXXXXPPPPPPPPXXXXXXXXXXX	GPAY(0.993)GLS(0.007)R	GPAY(21.59)GLS(-21.59)R
0	0.0324516	-0.261267	-0.174971	-0.852019	Y	3	0.999944	5.45e-09	151.99	135.32	Q9Y446;Q9Y446-2	84;99	Q9Y446	Q9Y446	Plakophilin-3	PKP3	PEPEAETARGTSRGQYHTLQAGFSSRSQGLS	42.5516	X;X;X;X;X;X;X;X;X;X;X;X;X;X;X;Phospho (STY);X;X;X;X;X;X;X;X;X;X;X;X;X;X;X	XXXXXXXXXXXXXPPPPPPPPPPPPPXXXXX	GQY(1)HTLQAGFSSR	GQY(42.55)HT(-42.55)LQAGFS(-138.83)S(-143.45)R
0	-0.342901	-0.0628146	-0.0968952	-0.854435	Y	4	0.999851	1.53e-20	212.72	191.89	P42680	519	P42680	P42680	Tyrosine-protein kinase Tec	TEC	KVSDFGMARYVLDDQYTSSSGAKFPVKWCPP	39.8229	X;X;X;X;X;X;X;X;X;X;X;X;X;X;X;Phospho (STY);X;X;X;X;X;X;X;X;X;X;X;X;X;X;X	XXXXXXXXXPPPPPPPPPPPPPPPPPPXXXX	YVLDDQY(1)TSSSGAKFPVK	Y(-72.99)VLDDQY(39.82)T(-39.82)S(-46.77)S(-46.77)S(-55.66)GAKFPVK
0	-0.26041	-0.82966	-0.31623	-0.857101	Y	3	1	7.75e-06	105.95	77.668	Q8WZ64	77	Q8WZ64	Q8WZ64	Arf-GAP with Rho-GAP domain, ANK repeat and PH domain-containing protein 2	ARAP2	KQLQIILSKMQDIPIYANVHKTKKNDDPSKD	105.951	X;X;X;X;X;X;X;X;X;Oxidation (M);X;X;X;X;X;Phospho (STY);X;X;X;X;X;X;X;X;X;X;X;X;X;X;X	XXXXXXXXXPPPPPPPPPPPPXXXXXXXXXX	MQDIPIY(1)ANVHK	MQDIPIY(105.95)ANVHK
0	-0.0360986	-0.12104	-0.664471	-0.857365	Y	3	1	5.04e-13	169.94	144.03	Q15464-2;Q15464	114;114	Q15464-2	Q15464-2	SH2 domain-containing adapter protein B	SHB	PGSSLRKLRAMCRLDYCGGSGEPGGVQRAFS	65.3028	X;X;X;X;X;X;X;X;X;X;X;X;X;X;X;Phospho (STY);X;X;X;X;X;X;X;X;X;X;X;X;X;X;X	XXXXXXXXXXXXXPPPPPPPPPPPPPPPXXX	LDY(1)CGGSGEPGGVQR	LDY(65.3)CGGS(-65.3)GEPGGVQR
0	-0.102972	-0.342645	-0.296224	-0.862926	Y	3	0.989739	6.34e-20	196.1	173.67	Q99569	1094	Q99569	Q99569	Plakophilin-4	PKP4	THKGLYPGSSKPSPIYISSYSSPAREQNRRL	20.1731	X;X;X;X;X;X;X;X;X;X;X;X;X;X;X;Phospho (STY);X;X;X;X;X;X;X;X;X;X;X;X;X;X;X	XXXPPPPPPPPPPPPPPPPPPPPPPXXXXXX	GLYPGSSKPS(0.001)PIY(0.99)IS(0.01)SYSSPAR	GLY(-129.63)PGS(-95.57)S(-74.64)KPS(-31.93)PIY(20.17)IS(-20.17)S(-40.39)Y(-47.44)S(-51.92)S(-61.24)PAR
0	-0.0802829	-0.280301	-0.339606	-0.895901	Y	2	0.99643	0.000902246	113.5	60.341	Q8TDM6-2;Q8TDM6-4;Q8TDM6	857;1087;1197	Q8TDM6-2	Q8TDM6-2	Disks large homolog 5	DLG5	LTPSTTVSSILRNPIYTVRSHRVGPCSSPPA	24.4577	X;X;X;X;X;X;X;X;X;X;X;X;X;X;X;Phospho (STY);X;X;X;X;X;X;X;X;X;X;X;X;X;X;X	XXXXXXXXXXXXPPPPPPPXXXXXXXXXXXX	NPIY(0.996)T(0.004)VR	NPIY(24.46)T(-24.46)VR
0	0.169672	0.128402	-0.0393452	-0.896194	Y	2	0.989852	2.28e-05	111.79	84.112	Q9Y6N7-4;Q9Y6N7-3;Q9Y6N7;Q9Y6N7-2;Q9Y6N7-6;Q9Y6N7-5	893;896;932;936;896;896	Q9Y6N7-4	Q9Y6N7-4	Roundabout homolog 1	ROBO1	WLYRHRKKRNGLTSTYAGIRKVPSFTFTPTV	21.1795	X;X;X;X;X;X;X;X;X;X;X;X;X;X;X;Phospho (STY);X;X;X;X;X;X;X;X;X;Phospho (STY);X;X;X;X;X	XXXXXXXXXPPPPPPPPPPPXXXXXXXXXXX	NGLTS(0.008)T(0.002)Y(0.99)AGIR	NGLT(-35.97)S(-21.18)T(-26.24)Y(21.18)AGIR
0	-0.300536	-0.326959	-0.623436	-0.921834	Y	3	0.977992	3.88e-06	128.35	113.92	Q8N3R9-2;Q8N3R9	209;243	Q8N3R9-2	Q8N3R9-2	MAGUK p55 subfamily member 5	MPP5	AEQEMQLEPITDERVYESIGQYGGETVKIVR	16.4775	X;X;X;X;X;X;X;X;X;X;X;X;X;X;X;Phospho (STY);X;X;X;X;X;X;X;X;X;X;X;X;X;X;X	XXXXXXXXXXXXXXPPPPPPPPPPPPPPXXX	VY(0.978)ES(0.022)IGQYGGETVK	VY(16.48)ES(-16.48)IGQY(-97.31)GGET(-121.71)VK
0	-0.222373	-0.302069	-0.347917	-0.980572	Y	2	1	2.69e-18	204.31	157.01	O43491	623	O43491	O43491	Band 4.1-like protein 2	EPB41L2	IEGKKNSLRVEGDNIYVRHSNLMLEELDKAQ	138.08	X;X;X;X;X;X;Phospho (STY);X;X;X;X;X;X;X;X;Phospho (STY);X;X;X;X;X;X;X;X;X;X;X;X;X;X;X	XXXXPPPPPPPPPPPPPPXXXXXXXXXXXXX	VEGDNIY(1)VR	VEGDNIY(138.08)VR		yes
0	-0.333528	-0.50415	-0.670516	-0.985514	Y	2	1	4.63e-11	175.48	135.33	P11171-7;P11171-2;P11171;P11171-4;P11171-3	646;627;660;418;437	P11171-7	P11171-7	Protein 4.1	EPB41	DQTQKKRERLDGENIYIRHSNLMLEDLDKSQ	142.919	X;X;X;X;X;X;X;X;X;X;X;X;X;X;X;Phospho (STY);X;X;X;X;X;X;X;X;X;X;X;X;X;X;X	XXXXXXXPPPPPPPPPPPXXXXXXXXXXXXX	LDGENIY(1)IR	LDGENIY(142.92)IR		yes
0	-0.281998	-0.167785	-0.154905	-0.995183	Y	2	0.99906	1.29e-10	177.57	139.76	P07948;P07948-2;P08631-3;P08631-2;P08631-4;P08631	397;376;389;390;410;411	P07948	P07948	Tyrosine-protein kinase Lyn;Tyrosine-protein kinase HCK	LYN;HCK	KIADFGLARVIEDNEYTAREGAKFPIKWTAP	30.2633	X;X;X;X;X;X;X;X;X;X;X;X;X;X;X;Phospho (STY);X;X;X;X;X;X;X;X;X;X;X;X;X;X;X	XXXXXXXXXPPPPPPPPPPXXXXXXXXXXXX	VIEDNEY(0.999)T(0.001)AR	VIEDNEY(30.26)T(-30.26)AR		yes
0	-0.135299	-0.249259	-0.50513	-1.00841	Y	3	0.94753	0.000474945	109.83	79.217	P27448-8;P27448-6;P27448-3;P27448-4;P27448-2;P27448;P27448-7	429;492;508;508;531;508;515	P27448-8	P27448-8	MAP/microtubule affinity-regulating kinase 3	MARK3	PSSNTASGGMTRRNTYVCSERTTADRHSVIQ	12.5932	X;X;X;X;X;X;X;X;X;X;X;X;X;X;X;Phospho (STY);X;X;X;X;X;X;X;X;X;X;X;X;X;X;X	XXXXXXXXXXXXPPPPPPPPPXXXXXXXXXX	RNT(0.052)Y(0.948)VCSER	RNT(-12.59)Y(12.59)VCS(-34.74)ER
0	-0.2802	-0.30072	-0.44626	-1.01564	Y	3	0.940208	0.0125722	64.121	38.671	Q9NP61-2;Q9NP61	352;396	Q9NP61-2	Q9NP61-2	ADP-ribosylation factor GTPase-activating protein 3	ARFGAP3	KETSKDTETVLKTTGYSDRPTARRKPDYEPV	13.8463	X;X;X;X;X;X;X;X;X;X;X;X;X;X;X;Phospho (STY);X;X;X;X;X;X;X;X;X;X;X;X;X;X;X	XXXXXXXXXXXXPPPPPPPPPPPXXXXXXXX	T(0.007)T(0.014)GY(0.94)S(0.039)DRPTAR	T(-21.15)T(-18.36)GY(13.85)S(-13.85)DRPT(-41.64)AR		yes
0	0.0258939	0.000574902	-0.237029	-1.02042	Y	2	0.998897	2.65e-10	168.22	115.5	P55196-1;P55196;P55196-5;P55196-2;P55196-6;P55196-3	1172;1189;1188;1173;1189;1172	P55196-1	P55196-1	Afadin	MLLT4	PNVANQPPSPGGKSAYASGTTAKITSVSTGN	30.0015	X;X;X;X;X;X;X;X;X;X;X;X;X;X;X;Phospho (STY);X;X;X;X;X;X;X;X;X;X;X;X;X;X;X	XXXXXXXXXXXXXPPPPPPPPPPXXXXXXXX	SAY(0.999)AS(0.001)GTTAK	S(-39.81)AY(30)AS(-30)GT(-75.68)T(-100.52)AK		yes
0	0.0907121	-0.114318	-0.286414	-1.03283	Y	3	0.998726	2.25e-06	148.56	101.47	P55196-1;P55196;P55196-5;P55196-2;P55196-6;P55196-3	1213;1230;1229;1214;1230;1213	P55196-1	P55196-1	Afadin	MLLT4	RPEAYPIPTQTYTREYFTFPASKSQDRMAPP	28.944	X;X;X;X;X;X;X;X;X;X;X;X;X;X;X;Phospho (STY);X;X;X;X;X;X;X;X;X;X;X;X;X;X;X	XXXXXXXXXXXXXXPPPPPPPPPXXXXXXXX	EY(0.999)FT(0.001)FPASK	EY(28.94)FT(-28.94)FPAS(-78.5)K		yes
0	0.133835	-0.109244	-0.55037	-1.03698	Y	4	0.999999	2.88e-23	222.81	206.14	Q99569;Q99569-2	1168;1125	Q99569	Q99569	Plakophilin-4	PKP4	STDYSTQYGLKSTTNYVDFYSTKRPSYRAEQ	58.7361	X;X;X;X;X;X;X;X;X;X;X;X;X;X;X;Phospho (STY);X;X;X;X;X;X;X;X;X;X;X;X;X;X;X	XXXXXXXXXXXPPPPPPPPPPPPPPPPPXXX	STTNY(1)VDFYSTKRPSYR	S(-78.72)T(-72.81)T(-58.74)NY(58.74)VDFY(-97.77)S(-117.05)T(-117.05)KRPS(-127.25)Y(-121.45)R
0	-0.282728	-0.395064	-0.458883	-1.03947	Y	2	0.999995	0.000116614	126.52	88.794	Q96J84-3;Q96J84;Q96J84-2	519;622;638	Q96J84-3	Q96J84-3	Kin of IRRE-like protein 1	KIRREL	NVRAHEDRPSSRAVLYADYRAPGPARFDGRP	53.2737	X;X;X;X;X;X;X;X;X;X;X;X;X;X;X;Phospho (STY);X;X;X;X;X;X;X;X;X;X;X;X;X;X;X	XXXXXXXXXXXXPPPPPPPPPPPPPPXXXXX	AVLY(1)ADYR	AVLY(53.27)ADY(-53.27)R
0	-1.43065	-1.16895	-1.0798	-1.06815	Y	3	1	1.05e-27	231.62	207.15	Q05655;Q05655-2	313;313	Q05655	Q05655	Protein kinase C delta type;Protein kinase C delta type regulatory subunit;Protein kinase C delta type catalytic subunit	PRKCD	ASRRSDSASSEPVGIYQGFEKKTGVAGEDMQ	90.362	X;Phospho (STY);X;X;X;X;X;X;X;X;X;X;X;X;X;Phospho (STY);X;X;X;X;X;X;X;X;X;X;X;X;X;X;X	XXXPPPPPPPPPPPPPPPPPPXXXXXXXXXX	SDSASSEPVGIY(1)QGFEK	S(-105.07)DS(-101.37)AS(-94.81)S(-90.36)EPVGIY(90.36)QGFEK
0	-0.264546	-0.316834	-0.686303	-1.06949	Y	3	0.892399	3.1e-09	156.41	145.37	O60716-13;O60716-11;O60716-10;O60716-9;O60716-5;O60716-3;O60716-2;O60716;O60716-21;O60716-19;O60716-16;O60716-18;O60716-15;O60716-17;O60716-14;O60716-12;O60716-8;O60716-7;O60716-6;O60716-4;O60716-24;O60716-23;O60716-22;O60716-20	174;174;174;174;228;228;228;228;127;127;174;127;174;127;174;174;228;228;228;228;127;127;127;127	O60716-13	O60716-13	Catenin delta-1	CTNND1	YSRHYEDGYPGGSDNYGSLSRVTRIEERYRP	9.27307	X;X;X;X;X;X;X;X;X;X;X;X;X;X;X;Phospho (STY);X;X;X;X;X;X;X;X;X;X;X;X;X;X;X	XXXPPPPPPPPPPPPPPPPPPXXXXXXXXXX	HYEDGYPGGSDNY(0.892)GS(0.105)LS(0.002)R	HY(-139.69)EDGY(-103.68)PGGS(-53.14)DNY(9.27)GS(-9.27)LS(-26.29)R		yes
0	0.362934	-0.364262	-0.187687	-1.08476	Y	2	1	0.0019587	106.42	56.391	Q07157-2;Q07157	1066;1146	Q07157-2	Q07157-2	Tight junction protein ZO-1	TJP1	RFEEPAPLSYDSRPRYEQAPRASALRHEEQP	106.415	X;X;X;X;X;X;X;X;X;X;X;X;X;X;X;Phospho (STY);X;X;X;X;X;X;X;X;X;X;X;X;X;X;X	XXXXXXXXXXXXXXXPPPPPPXXXXXXXXXX	Y(1)EQAPR	Y(106.42)EQAPR
0	-0.336481	-0.16089	-0.564669	-1.11216	Y	3	0.999994	0.000138701	116.52	90.134	P42684-2;P42684-6;P42684-3;P42684	682;697;703;718	P42684-2	P42684-2	Abelson tyrosine-protein kinase 2	ABL2	FTPAQQEANLVPPKCYGGSFAQRNLCNDDGG	51.933	X;X;X;X;X;X;X;X;X;X;X;X;X;X;X;Phospho (STY);X;X;X;X;X;X;X;X;X;X;X;X;X;X;X	XXXXXXXXXXXXXXPPPPPPPPPXXXXXXXX	CY(1)GGSFAQR	CY(51.93)GGS(-51.93)FAQR
0	-0.161138	-0.209596	-0.565075	-1.14622	Y	3	0.938108	1.71e-27	234.25	207.42	Q96PD2;Q96PD2-2	715;729	Q96PD2	Q96PD2	Discoidin, CUB and LCCL domain-containing protein 2	DCBLD2	TFKATGNQPPPLVGTYNTLLSRTDSCSSAQA	11.9724	X;X;X;X;X;X;X;X;X;X;X;X;X;X;X;Phospho (STY);X;X;X;X;X;X;X;X;X;X;X;X;X;X;X	XXXPPPPPPPPPPPPPPPPPPPXXXXXXXXX	ATGNQPPPLVGT(0.002)Y(0.938)NT(0.06)LLS(0.001)R	AT(-156.47)GNQPPPLVGT(-27.3)Y(11.97)NT(-11.97)LLS(-32.09)R
0	-0.189084	-0.296677	-0.226517	-1.15655	Y	3	0.964343	1.29e-08	137.64	121.11	Q9NWQ8	341	Q9NWQ8	Q9NWQ8	Phosphoprotein associated with glycosphingolipid-enriched microdomains 1	PAG1	LVNKSGQSLTVPESTYTSIQGDPQRSPSSCN	14.5206	X;X;X;X;X;X;X;X;X;X;X;X;X;X;X;Phospho (STY);X;X;X;X;X;X;X;X;X;X;X;X;X;X;X	XXXXPPPPPPPPPPPPPPPPPPPPPXXXXXX	SGQSLTVPEST(0.034)Y(0.964)T(0.001)SIQGDPQR	S(-82.64)GQS(-80.21)LT(-67.14)VPES(-37.71)T(-14.52)Y(14.52)T(-29.37)S(-34.74)IQGDPQR
0	-0.450319	-0.282032	-0.482773	-1.15902	Y	2	0.94396	0.00481419	85.67	63.433	Q9UNF0	388	Q9UNF0	Q9UNF0	Protein kinase C and casein kinase substrate in neurons protein 2	PACSIN2	TVSEKDDTKAKNVSSYEKTQSYPTDWSDDES	12.4219	X;X;X;X;X;X;X;X;X;X;X;X;X;X;X;Phospho (STY);X;X;X;X;X;X;X;X;X;X;X;X;X;X;X	XXXXXXXXXXXPPPPPPPXXXXXXXXXXXXX	NVS(0.002)S(0.054)Y(0.944)EK	NVS(-26.75)S(-12.42)Y(12.42)EK
0	-0.102652	-0.0385708	-0.617478	-1.17057	Y	3	0.999565	1.27e-09	157.54	142.95	Q8N4C8-5;Q8N4C8-2;Q8N4C8-3;Q8N4C8-4;Q8N4C8	880;900;908;917;937	Q8N4C8-5	Q8N4C8-5	Misshapen-like kinase 1	MINK1	NSKGQSPPSKDGSGDYQSRGLVKAPGKSSFT	34.1461	X;X;X;X;X;X;X;X;X;X;X;X;X;X;X;Phospho (STY);X;X;X;X;X;X;X;X;X;X;X;X;X;X;X	XXXPPPPPPPPPPPPPPPPXXXXXXXXXXXX	GQSPPSKDGSGDY(1)QSR	GQS(-112.1)PPS(-86.19)KDGS(-34.15)GDY(34.15)QS(-43.02)R
0	-0.0439372	-0.0468846	-0.228586	-1.18383	Y	2	0.996475	0.0033339	93.429	32.641	Q8TEW8-6;Q8TEW8-3;Q8TEW8-2;Q8TEW8;Q8TEW8-5	1013;1013;1020;1082;981	Q8TEW8-6	Q8TEW8-6	Partitioning defective 3 homolog B	PARD3B	DGNAHNLRFEGMERQYASLPRGGPADPVDYL	24.5137	X;X;X;X;X;X;X;X;X;X;X;X;X;X;X;Phospho (STY);X;X;X;X;X;X;X;X;X;X;X;X;X;X;X	XXXXXXXXXXXXXXPPPPPPPXXXXXXXXXX	QY(0.996)AS(0.004)LPR	QY(24.51)AS(-24.51)LPR
0	-0.0310821	-0.0680656	-0.5276	-1.20715	Y	2	0.951317	0.000686766	122.79	12.909	Q96J84-3;Q96J84;Q96J84-2	627;730;746	Q96J84-3	Q96J84-3	Kin of IRRE-like protein 1	KIRREL	GLERTPYEAYDPIGKYATATRFSYTSQHSDY	12.9094	X;X;X;X;Phospho (STY);X;Phospho (STY);X;X;X;X;X;X;X;X;Phospho (STY);X;X;X;X;X;X;X;X;X;X;X;X;X;X;X	XXXXXXXXXXXXXXXPPPPPPXXXXXXXXXX	Y(0.951)AT(0.049)ATR	Y(12.91)AT(-12.91)AT(-96.57)R
0	-0.152923	-0.104928	-0.481473	-1.20999	Y	3	0.999995	2.8e-06	119.45	105.84	Q9C0B5-2;Q9C0B5;Q9ULC8-2;Q9ULC8;Q9ULC8-3	480;533;449;541;541	Q9C0B5-2	Q9C0B5-2	Palmitoyltransferase ZDHHC5;Probable palmitoyltransferase ZDHHC8	ZDHHC5;ZDHHC8	LVPTGPTHREPSPVRYDNLSRHIVASLQERE	52.68	X;X;X;X;X;X;X;X;X;X;X;Phospho (STY);X;X;X;Phospho (STY);X;X;X;X;X;X;X;X;X;X;X;X;X;X;X	PPPPPPPPPPPPPPPPPPPPPXXXXXXXXXX	EPS(1)PVRY(1)DNLSR	EPS(66.39)PVRY(52.68)DNLS(-52.68)R
0	-0.139491	-0.237996	-0.407387	-1.21728	Y	2	0.999819	3.08e-23	221.54	185.77	O60716-13;O60716-11;O60716-10;O60716-9;O60716-5;O60716-3;O60716-2;O60716;O60716-21;O60716-19;O60716-18;O60716-17;O60716-29;O60716-27;O60716-26;O60716-25	844;850;844;850;898;904;898;904;797;803;797;803;575;581;575;581	O60716-13	O60716-13	Catenin delta-1	CTNND1	QMSNMGSNTKSLDNNYSTPNERGDHNRTLDR	37.4345	X;X;X;X;X;X;X;X;X;X;X;X;X;X;X;Phospho (STY);X;X;X;X;X;X;X;X;X;X;X;X;X;X;X	XXXXXXXXXXPPPPPPPPPPPPXXXXXXXXX	SLDNNY(1)STPNER	S(-89.75)LDNNY(37.43)S(-37.43)T(-69.54)PNER		yes
0	-0.136621	-0.427774	-0.457288	-1.21757	Y	3	0.99997	1.86e-06	140.16	98.735	Q9UDY2-4;Q9UDY2-2;Q9UDY2-6;Q9UDY2-3;Q9UDY2;Q9UDY2-7	1009;1032;1146;1156;1179;1210	Q9UDY2-4	Q9UDY2-4	Tight junction protein ZO-2	TJP2	EEYRQQLSEHSKRGYYGQSARYRDTEL____	45.3603	X;X;X;X;X;X;X;X;X;X;X;X;X;X;X;Phospho (STY);X;X;X;X;X;X;X;X;X;X;X;X;X;X;X	XXXXXXXXXXXXPPPPPPPPPXXXXXXXXXX	RGYY(1)GQSAR	RGY(-45.36)Y(45.36)GQS(-63.94)AR
0	-0.0539913	-0.303047	-0.293826	-1.29102	Y	3	1	6.59e-09	152.07	135.18	O60716-13;O60716-11;O60716-10;O60716-9;O60716-5;O60716-3;O60716-2;O60716;O60716-21;O60716-19;O60716-16;O60716-18;O60716-15;O60716-17;O60716-14;O60716-12;O60716-8;O60716-7;O60716-6;O60716-4;O60716-24;O60716-23;O60716-22;O60716-20	203;203;203;203;257;257;257;257;156;156;203;156;203;156;203;203;257;257;257;257;156;156;156;156	O60716-13	O60716-13	Catenin delta-1	CTNND1	RPSMEGYRAPSRQDVYGPQPQVRVGGSSVDL	85.6797	X;X;X;X;X;X;X;X;X;X;X;X;X;X;X;Phospho (STY);X;X;X;X;X;X;X;X;X;X;X;X;X;X;X	XXXXXXXXPPPPPPPPPPPPPPPXXXXXXXX	APSRQDVY(1)GPQPQVR	APS(-85.68)RQDVY(85.68)GPQPQVR		yes
0	-0.0936192	-0.115785	-0.0981757	-1.32932	Y	3	0.999979	2.68e-32	258.41	238.1	Q9NWQ8	417	Q9NWQ8	Q9NWQ8	Phosphoprotein associated with glycosphingolipid-enriched microdomains 1	PAG1	LGTNGHHGLVPKENDYESISDLQQGRDITRL	46.6943	X;X;X;X;X;X;X;X;X;X;X;X;X;X;X;Phospho (STY);X;X;X;X;X;X;X;X;X;X;X;X;X;X;X	XXXXXXXXXXXXPPPPPPPPPPPPPPXXXXX	ENDY(1)ESISDLQQGR	ENDY(46.69)ES(-46.69)IS(-109.95)DLQQGR
0	-1.86298	-1.97232	-1.82825	-1.3332	Y	2	1	2.61e-11	184.38	142.09	Q13627-3;Q13627-4;Q13627-5;Q9Y463-2;Q9Y463-3;Q9Y463;Q13627-2;Q13627	321;321;321;273;273;273;312;321	Q13627-3	Q13627-3	Dual specificity tyrosine-phosphorylation-regulated kinase 1A;Dual specificity tyrosine-phosphorylation-regulated kinase 1B	DYRK1A;DYRK1B	VDFGSSCQLGQRIYQYIQSRFYRSPEVLLGM	75.2364	X;X;X;X;X;X;X;X;X;X;X;X;X;X;X;Phospho (STY);X;X;X;X;X;X;X;X;X;X;X;X;X;X;X	XXXXXXXXXXXXPPPPPPPPXXXXXXXXXXX	IYQY(1)IQSR	IY(-75.24)QY(75.24)IQS(-75.31)R
0	0.0376862	-0.189334	-0.240055	-1.42022	Y	2	1	2.29e-06	135.86	101.61	Q13009-2;Q13009	384;384	Q13009-2	Q13009-2	T-lymphoma invasion and metastasis-inducing protein 1	TIAM1	DSGSSSTGDAARQGVYENFRRELEMSTTNSE	76.9272	X;X;X;X;X;X;X;X;X;X;X;X;X;X;X;Phospho (STY);X;X;X;X;X;X;X;X;X;X;X;X;X;X;X	XXXXXXXXXXXXPPPPPPPPPXXXXXXXXXX	QGVY(1)ENFRR	QGVY(76.93)ENFRR
0	-0.427262	-0.536504	-0.589259	-1.46887	Y	3	0.999468	1.83e-74	345.2	320.64	Q99569;Q99569-2	478;478	Q99569	Q99569	Plakophilin-4	PKP4	LTYQRNNYALNTTATYAEPYRPIQYRVQECN	32.7387	X;X;Phospho (STY);X;X;X;X;X;X;X;X;X;X;X;X;Phospho (STY);X;X;X;X;X;X;X;X;X;X;X;X;X;X;X	XXXXXPPPPPPPPPPPPPPPPPPPPPXXXXX	NNYALNTTAT(0.001)Y(0.999)AEPYRPIQYR	NNY(-182.44)ALNT(-108.15)T(-90.24)AT(-32.74)Y(32.74)AEPY(-81.65)RPIQY(-157.15)R
0	-0.380548	-0.0948018	-0.68293	-1.51236	Y	4	0.925304	1.2e-08	134.83	126.36	Q8IZP0-2;Q8IZP0-4;Q8IZP0-3;Q8IZP0-5;Q8IZP0-6;Q8IZP0-9;Q8IZP0-12;Q8IZP0;Q8IZP0-11;Q8IZP0-10;Q8IZP0-8;Q8IZP0-7	208;213;213;208;213;213;230;213;149;208;213;213	Q8IZP0-2	Q8IZP0-2	Abl interactor 1	ABI1	YKTLEPVKPPTVPNDYMTSPARLGSQHSPGR	11.8625	X;X;X;X;X;X;X;X;X;X;X;X;X;X;X;Phospho (STY);Oxidation (M);X;X;X;X;X;X;X;X;X;X;X;X;X;X	XXPPPPPPPPPPPPPPPPPPPPXXXXXXXXX	TLEPVKPPTVPNDY(0.925)MT(0.06)S(0.014)PAR	T(-78.87)LEPVKPPT(-62.14)VPNDY(11.86)MT(-11.86)S(-18.07)PAR		yes
0	-0.0733022	-0.0906468	-0.376953	-1.53083	Y	3	0.999755	4.01e-09	153.81	128.96	P16591-3;P16591-2;P16591	345;539;714	P16591-3	P16591-3	Tyrosine-protein kinase Fer	FER	KISDFGMSRQEDGGVYSSSGLKQIPIKWTAP	36.1048	X;X;X;X;X;X;X;X;X;X;X;X;X;X;X;Phospho (STY);X;X;X;X;X;X;X;X;X;X;X;X;X;X;X	XXXXXXXXXPPPPPPPPPPPPPXXXXXXXXX	QEDGGVY(1)SSSGLK	QEDGGVY(36.1)S(-36.1)S(-68.27)S(-79.38)GLK
0	0.0206639	-0.044627	-0.300313	-1.545	Y	3	0.999232	1.81e-08	153.75	116.39	Q9UPS8;Q9UPS8-3	296;296	Q9UPS8	Q9UPS8	Ankyrin repeat domain-containing protein 26	ANKRD26	LMTASQQSRKNLEATYGTVRTGNRTLFEDRD	31.4091	X;X;X;X;X;X;X;X;X;X;X;X;X;X;X;Phospho (STY);X;X;X;X;X;X;X;X;X;X;X;X;X;X;X	XXXXXXXXXPPPPPPPPPPPXXXXXXXXXXX	KNLEAT(0.001)Y(0.999)GTVR	KNLEAT(-31.41)Y(31.41)GT(-43.45)VR
0	-0.120776	-0.532742	-0.582612	-1.67111	Y	3	0.998435	0.000131924	118.5	92.111	Q8WZ64	380	Q8WZ64	Q8WZ64	Arf-GAP with Rho-GAP domain, ANK repeat and PH domain-containing protein 2	ARAP2	EAATATNSFIIKSSIYDNRKEKISEDKVEDI	28.7971	X;X;X;X;X;X;X;X;X;X;X;X;X;X;X;Phospho (STY);X;X;X;X;X;X;X;X;X;X;X;X;X;X;X	XXXXXXXXXXXXPPPPPPPPXXXXXXXXXXX	SS(0.001)IY(0.998)DNRK	S(-36.04)S(-28.8)IY(28.8)DNRK
0	-0.36329	-0.383924	-0.487894	-1.67747	Y	2	0.998652	4.48e-24	226.85	203.45	P54764-2;P54764;P54756-3;P29320;P54756-2;P54756	728;779;765;779;811;833	P54764-2	P54764-2	Ephrin type-A receptor 4;Ephrin type-A receptor 5;Ephrin type-A receptor 3	EPHA4;EPHA5;EPHA3	DFGMSRVLEDDPEAAYTTRGGKIPIRWTAPE	28.818	X;X;X;X;X;X;X;X;X;X;X;X;X;X;X;Phospho (STY);X;X;X;X;X;X;X;X;X;X;X;X;X;X;X	XXXXXXPPPPPPPPPPPPPXXXXXXXXXXXX	VLEDDPEAAY(0.999)T(0.001)TR	VLEDDPEAAY(28.82)T(-28.82)T(-44.3)R
0	-0.646336	-0.389576	-0.326035	-1.80507	Y	4	1	1.23e-05	108.75	76.389	Q8TEW8-6;Q8TEW8-3;Q8TEW8-2;Q8TEW8	931;931;938;1000	Q8TEW8-6	Q8TEW8-6	Partitioning defective 3 homolog B	PARD3B	DGHPLSPERDHLEGLYAKVNKPYHPLVPADS	77.4407	X;X;X;X;X;X;X;X;X;X;X;X;X;X;X;Phospho (STY);X;X;X;X;X;X;X;X;X;X;X;X;X;X;X	PPPPPPPPPPPPPPPPPPXXXXXXXXXXXXX	DGHPLSPERDHLEGLY(1)AK	DGHPLS(-77.44)PERDHLEGLY(77.44)AK

## Sheet: Fig1D
LFQ intensity Dox-_01	LFQ intensity Dox-_02	LFQ intensity Dox-_03	LFQ intensity Dox+_01	LFQ intensity Dox+_02	LFQ intensity Dox+_03	Welch's T-test Significant Doc+_Doc-	Welch's T-test significant	Peptides	Razor + unique peptides	Unique peptides	Sequence coverage [%]	Unique + razor sequence coverage [%]	Unique sequence coverage [%]	Mol. weight [kDa]	Q-value	Score	Intensity	MS/MS count	-Log Welch's T-test p-value Doc+_Doc-	Welch's T-test q-value Doc+_Doc-	Welch's T-test Difference Doc+_Doc-	Welch's T-test Test statistic Doc+_Doc-	Protein IDs	Majority protein IDs	Protein names	Gene names	id
3.74011	3.68831	3.74694	12.235	12.2812	12.4318	+	Doc+_Doc-	87	87	86	59.8	59.8	59.3	176.44	0	323.31	1533100000000	1810	4.98427	0	8.59089	52.9543	Q9UM73;Q13164	Q9UM73	ALK tyrosine kinase receptor	ALK	3113	up
-3.52807	-4.18745	-2.51382	2.54864	2.42647	2.79936	+	Doc+_Doc-	20	20	20	30.8	30.8	30.8	97.414	0	224.28	1744400000	51	2.32464	0	6.00127	10.0194	Q99959	Q99959	Plakophilin-2	PKP2	2576	up
-3.572	-3.10879	NaN	2.21148	2.22167	2.51896	+	Doc+_Doc-	17	17	17	21.5	21.5	21.5	118.63	0	256.6	1442700000	40	2.02102	0	5.65777	16.0456	Q9Y4F1	Q9Y4F1	FERM, RhoGEF and pleckstrin domain-containing protein 1	FARP1	3228	up
-1.6783	-1.92765	-1.67742	3.70733	3.66545	3.74267	+	Doc+_Doc-	17	17	16	42.4	42.4	40.3	62.821	0	323.31	3782600000	67	4.03329	0	5.46628	29.3566	P29353;Q6S5L8	P29353	SHC-transforming protein 1	SHC1	839	up
-2.64867	-1.93169	-2.25622	2.6778	2.6277	3.07988	+	Doc+_Doc-	25	25	24	23.4	23.4	22.7	162.1	0	263.95	2022400000	51	4.06509	0	5.07399	14.4194	Q15262	Q15262	Receptor-type tyrosine-protein phosphatase kappa	PTPRK	1753	up
-2.39188	-2.55938	-2.48474	2.16642	2.34237	2.3796	+	Doc+_Doc-	16	16	16	21.9	21.9	21.9	121.72	0	146.22	1432300000	35	5.86879	0	4.7748	26.2839	Q9NNW5	Q9NNW5	WD repeat-containing protein 6	WDR6	2826	up
-3.12945	-2.87529	-2.80024	1.36233	1.87069	1.71216	+	Doc+_Doc-	14	14	14	35.6	35.6	35.6	57.46	0	96.666	923920000	22	4.34608	0	4.58339	16.3571	Q9C037	Q9C037	E3 ubiquitin-protein ligase TRIM4	TRIM4	2688	up
-3.62627	-3.75052	-3.34348	-1.07514	2.27371	1.77206	+	Doc+_Doc-	14	12	10	18.6	16.2	13.5	83.597	0	108.27	833210000	29	1.32998	0.003	4.56363	3.96937	P27986	P27986	Phosphatidylinositol 3-kinase regulatory subunit alpha	PIK3R1	824	up
-2.40908	-2.32577	-3.35964	1.41318	1.90337	2.2114	+	Doc+_Doc-	15	15	15	31.3	31.3	31.3	76.177	0	170.42	1063000000	30	3.1913	0	4.54081	8.99261	Q8N5G2	Q8N5G2	Macoilin	TMEM57	2190	up
-1.43778	-2.40609	-1.46467	2.65526	2.83563	2.51463	+	Doc+_Doc-	24	24	24	35.1	35.1	35.1	101.34	0	298.47	1881100000	62	2.53545	0	4.43802	10.2813	Q6ZNB6	Q6ZNB6	NF-X1-type zinc finger protein NFXL1	NFXL1	2009	up
-2.10648	-2.80381	-3.00052	1.65082	1.68265	1.77143	+	Doc+_Doc-	11	11	11	32.3	32.3	32.3	47.878	0	115.17	954100000	35	2.46768	0	4.33857	11.612	O14763	O14763	Tumor necrosis factor receptor superfamily member 10B	TNFRSF10B	124	up
-2.93758	NaN	-2.59883	1.44398	1.58529	1.52263	+	Doc+_Doc-	11	11	8	33.7	33.7	28	48.423	0	103.34	837060000	19	1.73956	0.000217687	4.28551	15.627	Q96IG2	Q96IG2	F-box/LRR-repeat protein 20	FBXL20	2466	up
-0.0535126	-0.541327	0.683018	4.26595	4.23009	4.34131	+	Doc+_Doc-	21	21	12	43.8	43.8	30.6	60.801	0	323.31	5734600000	57	2.18201	0	4.24972	9.29172	P07947	P07947	Tyrosine-protein kinase Yes	YES1	547	up
0.758543	0.694249	0.907114	4.89473	4.82384	4.9287	+	Doc+_Doc-	13	13	13	38.8	38.8	38.8	40.513	0	193.97	8741400000	63	4.82868	0	4.09579	24.0653	Q9UBS4	Q9UBS4	DnaJ homolog subfamily B member 11	DNAJB11	3015	up
-1.17282	-1.49291	-1.18168	2.83486	2.55309	2.99196	+	Doc+_Doc-	17	17	17	53.6	53.6	53.6	52.296	0	226.6	2048500000	45	4.6496	0	4.07578	15.3217	Q00013	Q00013	55 kDa erythrocyte membrane protein	MPP1	1424	up
-2.0699	-1.40855	-1.65714	2.34397	2.24162	2.47895	+	Doc+_Doc-	10	10	10	42.5	42.5	42.5	29.044	0	121.13	1506800000	21	3.08964	0	4.06671	13.3446	Q9BZG1	Q9BZG1	Ras-related protein Rab-34	RAB34	2680	up
-2.29995	-4.15088	-2.75133	0.305441	1.29502	1.33	+	Doc+_Doc-	17	17	15	22.2	22.2	20.1	116.07	0	211.12	603570000	35	2.19403	0	4.0442	5.38809	Q7L7X3	Q7L7X3	Serine/threonine-protein kinase TAO1	TAOK1	2035	up
0.554514	0.317172	0.641884	4.37186	4.31719	4.55707	+	Doc+_Doc-	51	51	44	39.3	39.3	35.2	212.88	0	323.31	6298900000	111	4.95053	0	3.91085	17.6834	P10586	P10586	Receptor-type tyrosine-protein phosphatase F	PTPRF	595	up
-1.83916	-1.99061	-1.73911	1.83686	1.89943	2.0685	+	Doc+_Doc-	10	10	10	46.6	46.6	46.6	34.188	0	141.22	1131000000	28	5.51436	0	3.79122	18.8947	Q9Y6I9	Q9Y6I9	Testis-expressed sequence 264 protein	TEX264	3291	up
-3.13324	-3.60834	-3.47419	0.374405	0.28229	0.457874	+	Doc+_Doc-	5	5	5	10.6	10.6	10.6	63.926	0	40.939	383270000	14	3.35086	0	3.77678	15.0931	P52429	P52429	Diacylglycerol kinase epsilon	DGKE	1163	up
-3.53859	-4.02421	-3.49188	0.0639629	-0.0236702	0.159466	+	Doc+_Doc-	4	4	4	9	9	9	78.643	0	46.974	310420000	12	3.03677	0	3.75148	13.4838	Q5K4L6	Q5K4L6	Long-chain fatty acid transport protein 3	SLC27A3	1892	up
0.518463	0.328507	0.601418	4.10735	4.02781	4.22741	+	Doc+_Doc-	11	11	11	73.3	73.3	73.3	23.598	0	312.69	5189800000	48	5.06734	0	3.63806	18.2406	Q9HCN8	Q9HCN8	Stromal cell-derived factor 2-like protein 1	SDF2L1	2820	up
4.36232	4.13552	4.13143	7.65191	7.85067	8.01484	+	Doc+_Doc-	31	30	30	65.9	65.9	65.9	48.141	0	323.31	70351000000	300	4.66895	0	3.62939	15.7985	P27797	P27797	Calreticulin	CALR	821	up
-0.449764	-0.221944	-1.42826	2.74821	2.89221	3.05798	+	Doc+_Doc-	12	12	12	27.1	27.1	27.1	67.867	0	137.99	2221900000	42	2.11816	0	3.59945	7.48802	A1L0T0	A1L0T0	Acetolactate synthase-like protein	ILVBL	5	up
4.6246	4.72813	4.73775	8.18754	8.20926	8.36954	+	Doc+_Doc-	37	37	36	53.7	53.7	53.7	72.332	0	323.31	91406000000	347	5.30713	0	3.55862	21.1992	P11021	P11021	78 kDa glucose-regulated protein	HSPA5	603	up
-2.40339	NaN	-2.06081	1.206	1.50496	1.17378	+	Doc+_Doc-	12	12	10	24.6	24.6	20.4	87.91	0	132.94	729090000	32	2.26866	0	3.52701	11.7122	Q7KZI7;Q96L34	Q7KZI7	Serine/threonine-protein kinase MARK2	MARK2	2022	up
2.87403	2.83572	2.71824	6.09413	6.21235	6.27139	+	Doc+_Doc-	46	46	46	50.9	50.9	50.9	133.77	0	323.31	22106000000	196	5.9042	0	3.38329	19.8914	O14654	O14654	Insulin receptor substrate 4	IRS4	110	up
1.75448	1.64942	1.82862	5.01074	4.95785	5.06951	+	Doc+_Doc-	14	14	14	46.7	46.7	46.7	36.876	0	323.31	10012000000	69	5.2896	0	3.26852	20.2793	Q14257	Q14257	Reticulocalbin-2	RCN2	1680	up
-2.03857	-1.8952	-1.62906	1.21225	1.3833	1.50301	+	Doc+_Doc-	8	8	8	28.8	28.8	28.8	54.404	0	236.64	774380000	19	4.22965	0	3.22046	13.0558	P15260	P15260	Interferon gamma receptor 1	IFNGR1	673	up
-3.58957	-3.62173	-3.58631	-0.43405	-0.368143	-0.548746	+	Doc+_Doc-	5	5	5	12.5	12.5	12.5	52.518	0	46.369	221540000	11	3.8015	0	3.14889	20.4523	Q9BT22;Q6GMV1	Q9BT22	Chitobiosyldiphosphodolichol beta-mannosyltransferase	ALG1	2607	up
-1.55792	-1.92564	-1.60226	1.19904	1.37876	1.6047	+	Doc+_Doc-	13	13	12	18.5	18.5	16.9	92.923	0	118.02	793460000	29	4.31983	0	3.08944	11.6612	Q14156	Q14156	Protein EFR3 homolog A	EFR3A	1664	up
-2.06602	-2.24627	-1.54058	0.702507	1.52107	1.16417	+	Doc+_Doc-	11	11	11	23.8	23.8	23.8	63.882	0	125.43	687480000	21	3.17158	0	3.08021	7.37371	Q96KC8	Q96KC8	DnaJ homolog subfamily C member 1	DNAJC1	2486	up
3.7575	3.65409	3.73593	6.70034	6.68794	6.87277	+	Doc+_Doc-	29	28	28	64	61	61	56.782	0	323.31	32916000000	184	4.66176	0	3.03784	18.1412	P30101	P30101	Protein disulfide-isomerase A3	PDIA3	860	up
-2.23457	NaN	-2.10211	0.628721	0.798531	1.13972	+	Doc+_Doc-	8	8	8	16.6	16.6	16.6	71.438	0	75.641	554770000	15	3.14746	0	3.024	11.4458	Q86X29	Q86X29	Lipolysis-stimulated lipoprotein receptor	LSR	2106	up
-0.750711	-0.274945	-0.530573	2.3133	2.58998	2.61004	+	Doc+_Doc-	15	15	15	25.7	25.7	25.7	66.966	0	129.19	1718500000	38	3.91076	0	3.02318	11.3005	Q9NTJ5	Q9NTJ5	Phosphatidylinositide phosphatase SAC1	SACM1L	2885	up
-3.89431	-3.83382	-3.48285	-0.716047	-0.815378	-0.718025	+	Doc+_Doc-	3	3	3	11.9	11.9	11.9	38.963	0	25.628	180320000	8	2.98231	0	2.98718	12.8542	Q8NBM4	Q8NBM4	Ubiquitin-associated domain-containing protein 2	UBAC2	2215	up
-0.761251	-2.73853	-0.633204	1.66385	1.05263	2.06782	+	Doc+_Doc-	23	23	23	12.2	12.2	12.2	319.37	0	226.61	949280000	41	1.47658	0.00310866	2.97243	3.52774	P21359	P21359	Neurofibromin;Neurofibromin truncated	NF1	740	up
-1.93805	-1.72017	-1.82775	0.9207	0.928175	1.48644	+	Doc+_Doc-	7	7	7	27	27	27	39.672	0	67.209	659100000	17	2.7325	0	2.94043	9.87967	Q13190	Q13190	Syntaxin-5	STX5	1584	up
-1.6701	-1.18824	-1.20821	1.25295	1.62919	1.8421	+	Doc+_Doc-	9	9	9	23.3	23.3	23.3	52.743	0	97.35	915940000	22	3.61532	0	2.93026	8.79111	O15269	O15269	Serine palmitoyltransferase 1	SPTLC1	170	up
-0.73653	-0.773141	-0.709299	2.1978	2.12691	2.20475	+	Doc+_Doc-	12	11	11	30.1	28.7	28.7	58.573	0	190.7	1376400000	33	6.6533	0	2.91614	22.2616	P07948;P08631	P07948	Tyrosine-protein kinase Lyn	LYN	548	up
-2.45813	-2.27744	NaN	0.574465	0.242735	0.677204	+	Doc+_Doc-	8	8	8	25.5	25.5	25.5	50.195	0	80.843	426880000	18	3.42567	0	2.86592	11.0561	P80303	P80303	Nucleobindin-2;Nesfatin-1	NUCB2	1400	up
-0.545359	-1.10398	-0.975788	1.4103	2.05772	2.4905	+	Doc+_Doc-	18	16	16	26	24.1	24.1	108.27	0	171.22	1238800000	27	2.43015	0	2.86122	6.2684	P29317	P29317	Ephrin type-A receptor 2	EPHA2	837	up
-1.88288	-1.35006	-1.59428	1.46774	0.768419	1.49931	+	Doc+_Doc-	19	19	19	19.9	19.9	19.9	162.5	0	157.34	736530000	23	2.93134	0	2.85423	7.43426	Q9BZF9	Q9BZF9	Uveal autoantigen with coiled-coil domains and ankyrin repeats	UACA	2679	up
-2.6994	NaN	-2.86988	0.169037	-0.413317	0.411777	+	Doc+_Doc-	7	7	7	9	9	9	160.01	0	90.297	316320000	13	2.40948	0	2.84047	7.90706	Q92859	Q92859	Neogenin	NEO1	2348	up
-2.48845	-2.31665	-2.09323	0.528242	0.487722	0.587271	+	Doc+_Doc-	4	4	4	8.5	8.5	8.5	60.101	0	34.189	441260000	9	3.03686	0	2.83385	12.9989	Q15392	Q15392	Delta(24)-sterol reductase	DHCR24	1767	up
-0.615755	-0.714879	-0.853479	1.9301	1.95075	2.32324	+	Doc+_Doc-	18	18	18	27	27	27	105.12	0	255.94	1279800000	35	3.58056	0	2.79607	11.4051	O14936	O14936	Peripheral plasma membrane protein CASK	CASK	138	up
-2.49965	-2.87081	-2.4193	0.250988	0.0700455	0.212084	+	Doc+_Doc-	11	11	11	22.8	22.8	22.8	60.867	0	93.967	346240000	18	3.11774	0	2.77429	11.1177	Q9UQB8	Q9UQB8	Brain-specific angiogenesis inhibitor 1-associated protein 2	BAIAP2	3145	up
-1.80725	NaN	-2.49873	0.583477	0.547983	0.729753	+	Doc+_Doc-	14	14	14	18.4	18.4	18.4	132.89	0	147.02	463400000	27	1.13944	0.00664699	2.7734	6.16056	Q53EP0	Q53EP0	Fibronectin type III domain-containing protein 3B	FNDC3B	1863	up
-1.01648	-0.743066	-0.913141	1.88343	1.74426	1.83797	+	Doc+_Doc-	18	18	18	29	29	29	102.36	0	162.5	1084300000	35	4.08805	0	2.71278	14.3063	A0FGR8	A0FGR8	Extended synaptotagmin-2	ESYT2	2	up
0.054903	-0.682515	-0.992264	2.08255	2.00435	2.4257	+	Doc+_Doc-	23	23	23	28.3	28.3	28.3	110.04	0	277.69	1388500000	46	2.22187	0	2.71083	6.21095	Q9P0K7;Q9C0D0	Q9P0K7	Ankycorbin	RAI14	2973	up
0.191967	0.15796	0.471556	2.89092	2.90608	3.14326	+	Doc+_Doc-	16	16	16	35	35	35	63.523	0	185.98	2414100000	43	4.39671	0	2.70626	11.8368	O95470	O95470	Sphingosine-1-phosphate lyase 1	SGPL1	431	up
-2.23512	-2.39051	-2.46247	-0.201925	1.34386	-0.138018	+	Doc+_Doc-	9	9	8	20.4	20.4	18.1	70.803	0	90.324	442490000	17	1.50273	0.00312593	2.69734	4.42632	P49757	P49757	Protein numb homolog	NUMB	1097	up
-1.03907	-1.40649	-1.31021	1.3051	1.45673	1.53605	+	Doc+_Doc-	9	9	9	22	22	22	76.304	0	78.093	827200000	17	3.91077	0	2.68455	11.7133	Q9BTX1	Q9BTX1	Nucleoporin NDC1	NDC1	2617	up
-2.84123	-3.06349	-3.05068	0.254082	-1.64278	0.46776	+	Doc+_Doc-	10	10	10	19	19	19	76.118	0	65.662	290960000	17	1.253	0.00373901	2.67815	3.45745	Q8NE01	Q8NE01	Metal transporter CNNM3	CNNM3	2232	up
-0.180655	-0.444522	-0.730104	2.14978	2.119	2.40881	+	Doc+_Doc-	11	11	11	31	31	31	62.228	0	198.01	1465400000	28	3.31532	0	2.67762	9.44988	Q96KA5	Q96KA5	Cleft lip and palate transmembrane protein 1-like protein	CLPTM1L	2484	up
1.94553	1.72879	1.85246	4.37978	4.50547	4.62295	+	Doc+_Doc-	13	13	13	62.7	62.7	62.7	25.206	0	133.06	6962800000	70	4.9811	0	2.66047	13.701	P62993	P62993	Growth factor receptor-bound protein 2	GRB2	1359	up
0.629662	0.756013	0.828581	3.3237	3.40485	3.43983	+	Doc+_Doc-	19	19	19	54.1	54.1	54.1	49.797	0	270.36	3215900000	58	4.73412	0	2.65137	15.826	Q9Y4P3	Q9Y4P3	Transducin beta-like protein 2	TBL2	3235	up
1.52995	1.48157	1.7058	4.17982	4.15406	4.33621	+	Doc+_Doc-	31	31	31	47.1	47.1	47.1	108.17	0	323.31	5736000000	104	5.0016	0	2.65093	14.0431	O60716	O60716	Catenin delta-1	CTNND1	276	up
-2.40796	-1.72064	-1.73149	0.315725	0.204727	1.52921	+	Doc+_Doc-	20	20	20	19.4	19.4	19.4	158.3	0	159.41	524000000	30	1.94527	0	2.63658	4.53585	Q96RT1	Q96RT1	Protein LAP2	ERBB2IP	2515	up
0.477356	0.634786	0.61578	3.0665	3.16375	3.39871	+	Doc+_Doc-	19	19	19	37.9	37.9	37.9	69.81	0	230.97	2840800000	55	3.74444	0	2.63368	12.5183	P08240	P08240	Signal recognition particle receptor subunit alpha	SRPR	557	up
0.789085	0.0158758	0.374073	2.73092	3.01604	3.28521	+	Doc+_Doc-	12	12	12	65.3	65.3	65.3	30.037	0	197.94	2489400000	32	2.96725	0	2.61771	6.98409	P21964	P21964	Catechol O-methyltransferase	COMT	746	up
-0.928818	-1.13447	-1.01439	1.57793	1.48308	1.64282	+	Doc+_Doc-	8	7	7	31.3	27.1	27.1	52.592	0	125.3	912540000	21	5.12123	0	2.59383	14.775	Q9P0V9	Q9P0V9	Septin-10	SEPT10	2978	up
-0.244379	-0.3439	-0.743986	1.99961	2.07902	2.3097	+	Doc+_Doc-	16	16	16	46	46	46	49.966	0	141.37	1347600000	41	3.36891	0	2.57353	9.23178	P18031	P18031	Tyrosine-protein phosphatase non-receptor type 1	PTPN1	701	up
0.400599	0.522038	0.621861	2.95074	3.02227	3.27147	+	Doc+_Doc-	9	9	9	43.7	43.7	43.7	28.993	0	104.28	2686600000	47	4.11787	0	2.56666	11.8624	P30040	P30040	Endoplasmic reticulum resident protein 29	ERP29	848	up
-2.52894	-2.4242	-2.28124	0.108809	0.115093	0.198103	+	Doc+_Doc-	5	5	5	16.3	16.3	16.3	48.193	0	82.467	339840000	15	3.78688	0	2.55213	14.3912	Q9NQ84	Q9NQ84	G-protein coupled receptor family C group 5 member C	GPRC5C	2843	up
-0.574066	-0.817876	-0.501293	1.7957	1.7433	2.18047	+	Doc+_Doc-	24	24	22	17.8	17.8	16.8	197.3	0	206.13	1158600000	42	3.63563	0	2.53757	9.47535	Q5VT25	Q5VT25	Serine/threonine-protein kinase MRCK alpha	CDC42BPA	1918	up
2.13637	2.2009	2.24683	4.55753	4.70746	4.83534	+	Doc+_Doc-	29	29	27	49.6	49.6	47.1	80.419	0	323.31	8033500000	124	3.63354	0	2.50541	13.4384	O95573	O95573	Long-chain-fatty-acid--CoA ligase 3	ACSL3	437	up
-0.31007	-0.106032	-0.457125	2.13195	2.14883	2.34185	+	Doc+_Doc-	6	6	3	15.9	15.9	9	52.258	0	56.997	1426700000	18	4.0154	0	2.49862	11.2527	Q99717	Q99717	Mothers against decapentaplegic homolog 5	SMAD5	2560	up
-2.62765	-2.55374	NaN	-0.345589	-0.0205116	0.0431194	+	Doc+_Doc-	8	8	8	31.7	31.7	31.7	41.818	0	64.637	283410000	12	2.94082	0	2.48303	10.9908	Q9NXW2	Q9NXW2	DnaJ homolog subfamily B member 12	DNAJB12	2941	up
-1.07726	-1.53912	-1.08478	1.26804	1.17762	1.29961	+	Doc+_Doc-	16	16	15	15	15	14.5	171.49	0	153.25	736010000	26	2.60652	0	2.48214	9.65709	Q9P265	Q9P265	Disco-interacting protein 2 homolog B	DIP2B	2983	up
-2.17606	-2.02243	-2.16706	0.242149	0.193918	0.560593	+	Doc+_Doc-	6	6	6	24.7	24.7	24.7	44.123	0	57.045	390100000	17	3.28382	0	2.45407	10.8905	Q9UBU6	Q9UBU6	Protein FAM8A1	FAM8A1	3019	up
-1.72515	-2.06846	-1.77204	0.368269	0.709997	0.696815	+	Doc+_Doc-	10	10	10	12	12	12	129.48	0	109.51	468410000	20	4.02129	0	2.44691	9.59325	Q8NB49	Q8NB49	Phospholipid-transporting ATPase IG	ATP11C	2208	up
-1.87355	-2.42122	NaN	0.71715	-0.0598431	0.128912	+	Doc+_Doc-	5	5	5	6.8	6.8	6.8	119.89	0	126.41	379020000	12	1.85929	0	2.40946	5.23594	O94887	O94887	FERM, RhoGEF and pleckstrin domain-containing protein 2	FARP2	386	up
0.414635	0.479157	0.52697	2.77486	2.81955	2.99739	+	Doc+_Doc-	21	21	17	30.8	30.8	26	112.1	0	276.59	2260500000	55	4.01911	0	2.39034	13.6315	Q15375;Q9UF33;P54762;P54753;Q06187;P29322;Q5JZY3	Q15375	Ephrin type-A receptor 7	EPHA7	1764	up
2.07909	2.11895	2.22962	4.57749	4.35478	4.63236	+	Doc+_Doc-	14	14	14	58.3	58.3	58.3	38.89	0	298.66	7155900000	74	3.88348	0	2.37899	12.1329	Q15293	Q15293	Reticulocalbin-1	RCN1	1757	up
-1.4275	-1.46971	-1.07744	0.99979	0.911041	1.21359	+	Doc+_Doc-	6	6	3	33.5	33.5	16.8	21.834	0	43.155	640810000	13	3.72264	0	2.36636	9.34005	Q9NUP9;Q9HAP6	Q9NUP9	Protein lin-7 homolog C	LIN7C	2894	up
-1.5966	-1.30394	NaN	1.25871	1.3857	0.0431519	+	Doc+_Doc-	12	12	12	13.9	13.9	13.9	113.45	0	77.024	625730000	17	1.63821	0.000673511	2.34612	4.24828	Q6P1M3	Q6P1M3	Lethal(2) giant larvae protein homolog 2	LLGL2	1970	up
0.731827	0.721694	0.627331	2.95299	2.87495	3.25266	+	Doc+_Doc-	21	21	20	33	33	31.6	101.19	0	240.06	2543700000	53	2.90755	0	2.33325	10.6137	Q9BZF1	Q9BZF1	Oxysterol-binding protein-related protein 8	OSBPL8	2678	up
0.373354	0.241138	0.885298	2.75738	2.8256	2.91092	+	Doc+_Doc-	25	25	18	26.6	26.6	21.5	142.1	0	298.98	2221400000	64	2.28937	0	2.33137	7.73547	O95819	O95819	Mitogen-activated protein kinase kinase kinase kinase 4	MAP4K4	448	up
-0.449108	-0.422748	-0.707088	1.75476	1.74112	1.90419	+	Doc+_Doc-	10	10	10	26.1	26.1	26.1	59.143	0	109.03	1085600000	33	3.88466	0	2.32634	11.3662	Q16625	Q16625	Occludin	OCLN	1816	up
0.49218	0.525334	0.65093	2.872	2.79203	2.98049	+	Doc+_Doc-	23	23	23	26.2	26.2	26.2	131.45	0	323.31	2298100000	70	5.17878	0	2.32536	13.4462	P55011	P55011	Solute carrier family 12 member 2	SLC12A2	1210	up
2.72107	2.66484	2.64423	4.90484	4.96132	5.12432	+	Doc+_Doc-	18	18	18	53.2	53.2	53.2	48.115	0	323.31	9960600000	89	3.62531	0	2.32011	13.6725	P37268	P37268	Squalene synthase	FDFT1	953	up
0.208294	-0.239535	-0.142342	2.08553	2.28217	2.41838	+	Doc+_Doc-	6	6	6	15.2	15.2	15.2	54.489	0	68.657	1503700000	31	3.5383	0	2.31989	8.69436	Q9UBM7	Q9UBM7	7-dehydrocholesterol reductase	DHCR7	3008	up
0.545097	0.348248	0.140299	2.66559	2.58622	2.70797	+	Doc+_Doc-	9	9	9	45.6	45.6	45.6	20.7	0	84.392	1965800000	38	2.91321	0	2.30871	10.3904	P55145	P55145	Mesencephalic astrocyte-derived neurotrophic factor	MANF	1217	up
4.17915	4.10948	4.29095	6.36087	6.41741	6.62499	+	Doc+_Doc-	43	43	43	47.7	47.7	47.7	114.76	0	323.31	27772000000	236	4.2233	0	2.27456	11.5973	P16615;O14983;Q93084	P16615	Sarcoplasmic/endoplasmic reticulum calcium ATPase 2	ATP2A2	685	up
3.38355	3.4628	3.41748	5.59853	5.55826	5.84074	+	Doc+_Doc-	13	13	13	48.5	48.5	48.5	34.93	0	305.35	16159000000	95	3.07791	0	2.24457	11.7421	Q96AG4	Q96AG4	Leucine-rich repeat-containing protein 59	LRRC59	2389	up
0.266123	0.254418	0.328505	2.41358	2.40446	2.75594	+	Doc+_Doc-	22	22	22	30.1	30.1	30.1	131.85	0	242.98	1809300000	59	2.71535	0	2.24165	10.2859	Q9Y2H6	Q9Y2H6	Fibronectin type-III domain-containing protein 3A	FNDC3A	3172	up
-0.449905	-0.641677	-0.269772	1.73718	1.6689	1.91163	+	Doc+_Doc-	16	16	16	23.6	23.6	23.6	111.93	0	155.19	1071700000	42	3.78314	0	2.22635	9.7037	Q96PU5	Q96PU5	E3 ubiquitin-protein ligase NEDD4-like	NEDD4L	2501	up
1.20053	1.30966	1.28079	3.39144	3.40057	3.64231	+	Doc+_Doc-	41	41	39	36	36	34.5	174.88	0	323.31	3494700000	91	3.46295	0	2.21445	11.7543	Q14160	Q14160	Protein scribble homolog	SCRIB	1666	up
-0.797863	-0.454129	-0.206772	1.7146	1.82856	1.58134	+	Doc+_Doc-	12	12	12	29.8	29.8	29.8	68.019	0	105.4	1034900000	25	2.6574	0	2.19442	7.68139	P43378	P43378	Tyrosine-protein phosphatase non-receptor type 9	PTPN9	1016	up
1.2692	1.38334	1.43905	3.38386	3.53398	3.72468	+	Doc+_Doc-	11	11	11	29.6	29.6	29.6	44.468	0	154.88	3675600000	44	3.51472	0	2.18364	10.3703	Q16543	Q16543	Hsp90 co-chaperone Cdc37;Hsp90 co-chaperone Cdc37, N-terminally processed	CDC37	1813	up
2.13871	2.09142	2.16801	4.22917	4.29921	4.40144	+	Doc+_Doc-	29	29	29	40	40	40	111.33	0	323.31	6242700000	134	4.17057	0	2.17722	14.0676	Q9Y4L1	Q9Y4L1	Hypoxia up-regulated protein 1	HYOU1	3234	up
-2.86661	-2.97035	NaN	-1.81976	-0.217201	-0.18848	+	Doc+_Doc-	4	4	4	25.6	25.6	25.6	19.881	0	37.248	213080000	13	1.25976	0.00441551	2.17667	3.39294	Q99942	Q99942	E3 ubiquitin-protein ligase RNF5	RNF5	2574	up
0.353283	0.0307989	0.195381	2.44343	2.20454	2.39703	+	Doc+_Doc-	16	16	16	41.1	41.1	41.1	65.111	0	249.06	1609500000	52	4.10105	0	2.15518	9.86848	Q5VV42	Q5VV42	Threonylcarbamoyladenosine tRNA methylthiotransferase	CDKAL1	1922	up
-0.800726	-1.24929	-0.935072	1.24107	0.989317	1.23761	+	Doc+_Doc-	6	6	6	27.1	27.1	27.1	45.468	0	128.53	704600000	17	3.34151	0	2.15103	8.37348	Q9HCU5	Q9HCU5	Prolactin regulatory element-binding protein	PREB	2821	up
-3.07915	-3.19164	NaN	-0.687946	-1.90784	-0.362066	+	Doc+_Doc-	5	5	5	21.2	21.2	21.2	38.673	0	62.204	169360000	7	1.36659	0.00314683	2.14944	3.74599	Q9P2W9	Q9P2W9	Syntaxin-18	STX18	2997	up
1.417	1.60896	1.46065	3.57743	3.50753	3.82459	+	Doc+_Doc-	14	14	14	52.7	52.7	52.7	37.106	0	174.91	3943400000	56	3.7531	0	2.14098	10.0818	O43852	O43852	Calumenin	CALU	242	up
-2.14635	-2.2582	-2.14549	0.0477409	-0.00971222	-0.169443	+	Doc+_Doc-	5	5	5	27	27	27	30.223	0	42.194	308010000	10	4.23062	0	2.13954	12.2274	Q9NQX7	Q9NQX7	Integral membrane protein 2C;CT-BRI3	ITM2C	2853	up
0.429197	0.414021	0.732695	2.53638	2.66243	2.79566	+	Doc+_Doc-	18	18	18	26.1	26.1	26.1	115.42	0	229.1	2015100000	57	3.846	0	2.13952	9.38518	Q15334	Q15334	Lethal(2) giant larvae protein homolog 1	LLGL1	1758	up
-1.00687	-1.38898	-0.720179	1.12365	0.801298	1.29812	+	Doc+_Doc-	6	6	6	15.5	15.5	15.5	61.264	0	92.189	669280000	22	2.87774	0	2.11303	6.17324	Q96L92	Q96L92	Sorting nexin-27	SNX27	2491	up
-2.55124	-2.75445	-2.41293	-0.511284	-0.422152	-0.464043	+	Doc+_Doc-	5	5	5	10.8	10.8	10.8	58.875	0	40.577	229140000	10	2.89958	0	2.10704	10.4069	Q8N118	Q8N118	Cytochrome P450 4X1	CYP4X1	2167	up
0.212769	-0.0754232	0.376026	2.24395	2.28589	2.27575	+	Doc+_Doc-	8	8	8	30	30	30	31.791	0	84.158	1526000000	25	2.43458	0	2.0974	9.01805	Q9H3N1	Q9H3N1	Thioredoxin-related transmembrane protein 1	TMX1	2746	up
-1.29027	-0.878203	NaN	1.32899	1.11523	0.58716	+	Doc+_Doc-	8	8	8	22.6	22.6	22.6	52.901	0	110.7	649990000	18	2.1069	0	2.09469	5.21394	Q15036	Q15036	Sorting nexin-17	SNX17	1731	up
6.0485	5.93915	6.08917	8.08209	8.02945	8.16267	+	Doc+_Doc-	41	41	40	57	57	55.5	92.468	0	323.31	87286000000	334	5.30703	0	2.06579	12.9744	P14625;Q58FF3	P14625	Endoplasmin	HSP90B1	662	up
0.0975094	0.224984	0.710024	2.31885	2.43524	2.44895	+	Doc+_Doc-	24	24	24	37.1	37.1	37.1	104.11	0	251.22	1677200000	51	2.21419	0	2.05684	7.06575	Q86XL3	Q86XL3	Ankyrin repeat and LEM domain-containing protein 2	ANKLE2	2109	up
1.08259	0.936208	1.12297	3.04213	3.07952	3.18256	+	Doc+_Doc-	11	11	11	17.6	17.6	17.6	70.702	0	112.48	2719900000	40	4.76451	0	2.05414	12.0419	Q14739	Q14739	Lamin-B receptor	LBR	1711	up
-1.35686	-1.42507	-1.65299	0.323334	0.605154	0.770164	+	Doc+_Doc-	7	7	7	48.9	48.9	48.9	22.693	0	107.13	470600000	29	3.37986	0	2.04452	7.91779	P80723	P80723	Brain acid soluble protein 1	BASP1	1401	up
NaN	-3.72818	-4.12059	-2.08669	-1.8941	-1.67677	+	Doc+_Doc-	3	3	3	3.4	3.4	3.4	123.32	0	36.133	83176000	9	1.73014	0.000429474	2.03853	6.19311	Q96PY5	Q96PY5	Formin-like protein 2	FMNL2	2503	up
-1.58102	-1.20599	-1.83392	0.732582	0.502228	0.211081	+	Doc+_Doc-	4	4	1	24.3	24.3	6.9	19.815	0	28.289	453040000	11	2.92096	0	2.02228	6.00573	Q93096	Q93096	Protein tyrosine phosphatase type IVA 1	PTP4A1	2371	up
-0.825184	-0.936353	-0.894829	1.04149	1.18547	1.18201	+	Doc+_Doc-	8	8	8	34.2	34.2	34.2	37.251	0	92.177	698700000	29	4.90149	0	2.02178	12.8403	P48059;Q7Z4I7	P48059	LIM and senescent cell antigen-like-containing domain protein 1	LIMS1	1052	up
-0.637194	-1.25688	-0.735699	1.20501	1.1574	1.04554	+	Doc+_Doc-	6	6	6	42.3	42.3	42.3	20.652	0	89.596	703410000	17	2.19258	0	2.01257	6.75399	Q9Y2B0	Q9Y2B0	Protein canopy homolog 2	CNPY2	3166	up
4.34533	4.33485	4.43737	6.27234	6.33789	6.4624	+	Doc+_Doc-	34	34	33	49.7	49.7	49.7	67.567	0	323.31	26273000000	165	4.36362	0	1.98503	12.0629	P27824	P27824	Calnexin	CANX	823	up
0.204819	0.413783	0.0516624	2.21716	2.0994	2.28512	+	Doc+_Doc-	8	8	8	24.4	24.4	24.4	53.028	0	90.622	1465900000	37	3.33103	0	1.97714	9.06359	Q9Y679	Q9Y679	Ancient ubiquitous protein 1	AUP1	3279	up
-2.22101	-2.51556	-2.19714	-0.349232	-0.387762	-0.300604	+	Doc+_Doc-	8	8	8	12.9	12.9	12.9	104.01	0	92.057	251160000	18	2.77775	0	1.96537	9.56613	Q6ZXV5	Q6ZXV5	Transmembrane and TPR repeat-containing protein 3	TMTC3	2012	up
-1.1165	-0.753518	-1.00928	1.05198	0.825144	1.11285	+	Doc+_Doc-	10	10	9	22.8	22.8	21.2	96.749	0	105.81	638180000	14	3.72244	0	1.95643	8.19393	Q9BZL6	Q9BZL6	Serine/threonine-protein kinase D2	PRKD2	2683	up
2.7017	2.72489	2.76131	4.59706	4.65111	4.79005	+	Doc+_Doc-	34	34	34	47.6	47.6	47.6	101.43	0	323.31	8174100000	137	3.45933	0	1.9501	12.1851	Q7Z2W4	Q7Z2W4	Zinc finger CCCH-type antiviral protein 1	ZC3HAV1	2041	up
-2.68999	-2.65757	-2.57968	-0.985657	-0.504261	-0.591648	+	Doc+_Doc-	6	6	6	10.5	10.5	10.5	103.64	0	46.297	198630000	10	2.38093	0	1.94856	7.74342	Q07617	Q07617	Sperm-associated antigen 1	SPAG1	1499	up
3.10531	3.24624	3.2704	5.12881	5.03736	5.28982	+	Doc+_Doc-	15	15	15	41.8	41.8	41.8	48.121	0	271.32	11404000000	98	4.19114	0	1.94468	10.2364	Q15084	Q15084	Protein disulfide-isomerase A6	PDIA6	1740	up
-0.595303	-1.11229	-0.751154	1.12981	1.01916	1.20864	+	Doc+_Doc-	9	9	9	51.2	51.2	51.2	23.354	0	79.34	705610000	25	2.54499	0	1.93878	7.38092	O00161	O00161	Synaptosomal-associated protein 23	SNAP23	50	up
-1.02058	-1.04684	-1.38121	0.533245	0.812563	0.938192	+	Doc+_Doc-	8	8	8	48.1	48.1	48.1	26.659	0	120.48	543690000	17	3.47831	0	1.91088	7.16431	Q9ULC3	Q9ULC3	Ras-related protein Rab-23	RAB23	3102	up
-1.65285	-2.01942	-1.70567	0.0168381	0.0535393	0.281948	+	Doc+_Doc-	3	3	3	25	25	25	25.809	0	41.642	347300000	6	3.52113	0	1.91009	7.91573	P60033	P60033	CD81 antigen	CD81	1246	up
1.83232	1.48713	1.85323	3.55663	3.64482	3.67377	+	Doc+_Doc-	12	12	12	71.3	71.3	71.3	28.994	0	198.51	3964700000	67	2.68361	0	1.90085	8.49273	P50402	P50402	Emerin	EMD	1115	up
0.370705	0.474357	0.318241	2.11422	2.20495	2.531	+	Doc+_Doc-	20	20	20	34.1	34.1	34.1	87.996	0	221.83	1561100000	40	2.73248	0	1.89562	8.08022	Q9UGP8	Q9UGP8	Translocation protein SEC63 homolog	SEC63	3039	up
1.58357	1.68823	1.57142	3.52903	3.47612	3.51787	+	Doc+_Doc-	26	26	26	29.8	29.8	29.8	132.95	0	243.46	3650500000	79	4.31899	0	1.89327	13.4826	Q9HD20	Q9HD20	Manganese-transporting ATPase 13A1	ATP13A1	2822	up
-3.30909	-3.32354	-3.46531	-1.52909	-1.46238	-1.45065	+	Doc+_Doc-	5	5	5	4.3	4.3	4.3	166.63	0	42.108	114980000	9	4.14654	0	1.88527	12.1237	Q9Y2I1	Q9Y2I1	Nischarin	NISCH	3173	up
-1.17089	-1.94606	-1.12456	0.929729	0.870729	-0.410938	+	Doc+_Doc-	6	6	6	21.7	21.7	21.7	50.993	0	60.051	488260000	17	1.52513	0.00327667	1.87701	3.06624	Q6P9B6	Q6P9B6	TLD domain-containing protein 1	TLDC1	1982	up
3.14174	3.20846	3.21107	4.92918	4.96156	5.25269	+	Doc+_Doc-	32	32	32	45.3	45.3	45.3	122.29	0	323.31	10624000000	166	2.68119	0	1.86072	9.06178	Q14126	Q14126	Desmoglein-2	DSG2	1659	up
-1.13423	-1.76261	NaN	0.381601	0.357832	0.422108	+	Doc+_Doc-	9	8	8	3	2.8	2.8	426.74	0	76.578	413230000	21	0.971063	0.0162008	1.8356	4.42581	P11532	P11532	Dystrophin	DMD	618	up
-0.939693	-1.06108	-1.12146	0.738031	0.763096	0.859144	+	Doc+_Doc-	8	7	7	36.6	36.6	36.6	27.228	0	68.559	555580000	16	4.57855	0	1.8275	11.0788	O95292	O95292	Vesicle-associated membrane protein-associated protein B/C	VAPB	413	up
0.634619	0.632758	0.766668	2.42874	2.47083	2.53585	+	Doc+_Doc-	8	8	8	31.4	31.4	31.4	35.386	0	122.34	1808200000	33	4.87152	0	1.80046	11.6774	Q8TC12;Q96NR8	Q8TC12	Retinol dehydrogenase 11	RDH11	2265	up
-1.96003	-2.09564	NaN	0.210533	-1.13819	0.242321	+	Doc+_Doc-	6	5	5	10.1	9	9	86.955	0	36.807	288590000	5	1.25533	0.00486285	1.79939	3.21325	Q06481	Q06481	Amyloid-like protein 2	APLP2	1493	up
1.02343	1.0033	1.15279	2.75234	2.81721	3.00005	+	Doc+_Doc-	11	5	3	45.6	24.4	18.5	37.331	0	103.54	2336800000	29	3.93461	0	1.79669	9.57151	P62879;Q9BRK4	P62879	Guanine nucleotide-binding protein G(I)/G(S)/G(T) subunit beta-2	GNB2	1349	up
4.58643	4.53543	4.57109	6.24751	6.3316	6.48662	+	Doc+_Doc-	33	33	33	65.7	65.7	65.7	57.116	0	323.31	26526000000	182	3.00163	0	1.79093	10.434	P07237	P07237	Protein disulfide-isomerase	P4HB	534	up
1.44321	1.21472	1.52779	3.16596	3.23516	3.14833	+	Doc+_Doc-	17	17	17	42.9	42.9	42.9	55.873	0	318.53	2943000000	48	2.83848	0	1.78791	9.06717	Q96A33	Q96A33	Coiled-coil domain-containing protein 47	CCDC47	2383	up
-0.426352	-0.620269	-0.367086	1.20722	1.25122	1.43119	+	Doc+_Doc-	5	5	5	24	24	24	31.716	0	131.49	794500000	20	4.1392	0	1.76778	8.72287	Q99943	Q99943	1-acyl-sn-glycerol-3-phosphate acyltransferase alpha	AGPAT1	2575	up
NaN	-1.33964	-1.63573	0.3363	0.062376	0.439857	+	Doc+_Doc-	8	8	8	19.2	19.2	19.2	61.174	0	63.215	386310000	13	2.0559	0	1.7672	6.17889	Q9H223	Q9H223	EH domain-containing protein 4	EHD4	2725	up
-1.61917	-1.74117	-1.73091	-0.0170326	0.0202389	0.203249	+	Doc+_Doc-	2	2	2	12.3	12.3	12.3	28.319	0	37.595	339200000	12	3.89558	0	1.7659	9.89383	Q9H8H3	Q9H8H3	Methyltransferase-like protein 7A	METTL7A	2777	up
-0.582718	-0.346055	-0.438051	1.13859	1.33226	1.44053	+	Doc+_Doc-	15	15	15	30.4	30.4	30.4	67.764	0	110.41	799480000	30	3.85253	0	1.7594	8.29903	O00186	O00186	Syntaxin-binding protein 3	STXBP3	54	up
-0.412912	-0.663239	0.0853863	1.38995	1.3895	1.4959	+	Doc+_Doc-	11	11	11	31.6	31.6	31.6	56.974	0	126.58	872020000	30	1.86685	0	1.75537	5.43704	Q8NC56	Q8NC56	LEM domain-containing protein 2	LEMD2	2221	up
-2.95011	-3.39133	-3.67365	-1.39276	-1.79877	-1.57911	+	Doc+_Doc-	4	4	4	17.8	17.8	17.8	28.32	0	37.033	108820000	7	2.331	0	1.74815	5.12607	Q9UHQ4	Q9UHQ4	B-cell receptor-associated protein 29	BCAP29	3055	up
-0.067421	-0.47437	-0.314995	1.43263	1.38436	1.56633	+	Doc+_Doc-	16	14	14	32.5	30	30	79.187	0	136.52	892830000	32	2.90438	0	1.7467	7.58437	O60488	O60488	Long-chain-fatty-acid--CoA ligase 4	ACSL4	260	up
1.50842	1.45163	1.6132	3.1851	3.24671	3.37923	+	Doc+_Doc-	10	10	10	51.6	51.6	51.6	24.593	0	133.59	3211800000	43	4.58657	0	1.74593	10.0171	O75396	O75396	Vesicle-trafficking protein SEC22b	SEC22B	319	up
-1.77662	-1.55763	-1.6543	-0.149036	0.181484	0.167034	+	Doc+_Doc-	7	7	7	25.1	25.1	25.1	36.223	0	59.468	340700000	16	3.26008	0	1.72934	7.68317	Q9BXS4	Q9BXS4	Transmembrane protein 59	TMEM59	2660	up
-2.90598	NaN	-3.22494	-1.35645	-1.31619	-1.35361	+	Doc+_Doc-	4	4	4	7.8	7.8	7.8	60.908	0	40.291	125120000	10	1.24218	0.00645849	1.72338	6.6282	O00400	O00400	Acetyl-coenzyme A transporter 1	SLC33A1	74	up
-0.822937	-0.847533	-0.960781	0.58848	1.01461	0.886997	+	Doc+_Doc-	7	7	7	23.6	23.6	23.6	46.476	0	60.563	581110000	19	2.57635	0	1.70711	7.32	Q5VW32	Q5VW32	BRO1 domain-containing protein BROX	BROX	1923	up
-1.89329	-2.17177	-2.17497	-0.186426	-0.21666	-0.720432	+	Doc+_Doc-	6	6	6	24.3	24.3	24.3	33.843	0	53.303	256780000	9	2.53072	0	1.7055	5.74733	Q8NBJ7	Q8NBJ7	Sulfatase-modifying factor 2	SUMF2	2214	up
-1.87607	-1.66924	-1.63563	-1.0439	0.372906	0.578953	+	Doc+_Doc-	3	3	3	29.1	29.1	29.1	18.566	0	37.26	344700000	6	1.1149	0.00921437	1.6963	2.75553	P60604	P60604	Ubiquitin-conjugating enzyme E2 G2	UBE2G2	1251	up
-2.61385	-1.76285	-1.66681	-0.595135	0.200413	-0.567438	+	Doc+_Doc-	5	5	5	19.2	19.2	19.2	40.029	0	47.743	271510000	11	1.86351	0	1.69378	3.40006	P78310	P78310	Coxsackievirus and adenovirus receptor	CXADR	1387	up
2.72169	2.59569	2.59344	4.28744	4.26514	4.42931	+	Doc+_Doc-	27	27	27	33.2	33.2	33.2	122.85	0	323.31	6533600000	111	4.71143	0	1.69036	10.1444	Q9BSJ8	Q9BSJ8	Extended synaptotagmin-1	ESYT1	2604	up
-1.83879	-1.90338	-1.56348	0.324125	0.380552	-0.940062	+	Doc+_Doc-	7	7	7	11	11	11	102.8	0	63.746	338070000	11	1.28083	0.00475472	1.69009	3.10949	Q96J02	Q96J02	E3 ubiquitin-protein ligase Itchy homolog	ITCH	2473	up
1.44825	1.42515	1.62832	3.12797	3.12681	3.29225	+	Doc+_Doc-	13	13	13	40.4	40.4	40.4	52.623	0	211.75	2957900000	63	4.34632	0	1.68177	9.11411	Q96CS3	Q96CS3	FAS-associated factor 2	FAF2	2409	up
-3.0174	-2.46764	-2.73285	-1.01801	-1.01506	-1.15694	+	Doc+_Doc-	3	3	3	9.4	9.4	9.4	43.222	0	27.013	156930000	10	2.26113	0	1.67596	6.31261	Q9Y282	Q9Y282	Endoplasmic reticulum-Golgi intermediate compartment protein 3	ERGIC3	3159	up
1.52758	1.25105	1.46782	3.01915	3.08944	3.16449	+	Doc+_Doc-	24	24	24	33.4	33.4	33.4	118.39	0	261.96	2780500000	67	3.36373	0	1.67554	8.64105	Q13308	Q13308	Inactive tyrosine-protein kinase 7	PTK7	1593	up
-1.78487	-2.53721	-1.0759	-0.57921	0.274343	-0.0792389	+	Doc+_Doc-	8	8	8	12.6	12.6	12.6	92.067	0	91.746	308790000	19	1.42668	0.00303599	1.67129	2.83657	Q99523	Q99523	Sortilin	SORT1	2541	up
1.95121	1.8419	1.87619	3.56994	3.51124	3.59235	+	Doc+_Doc-	13	13	13	41.3	41.3	41.3	44.561	0	323.31	3889300000	70	5.35111	0	1.66808	11.8866	Q14318	Q14318	Peptidyl-prolyl cis-trans isomerase FKBP8	FKBP8	1683	up
-1.69508	-1.81514	-1.88467	0.0224304	-0.738777	0.31184	+	Doc+_Doc-	6	6	6	12.4	12.4	12.4	72.063	0	48.754	306240000	17	1.51612	0.00312953	1.66346	3.97795	Q6P1M0	Q6P1M0	Long-chain fatty acid transport protein 4	SLC27A4	1969	up
0.0244789	-0.177085	-0.114834	1.64077	1.40744	1.67007	+	Doc+_Doc-	4	4	4	16.4	16.4	16.4	35.293	0	133.02	973140000	22	3.7935	0	1.66191	8.21715	Q9NYP7	Q9NYP7	Elongation of very long chain fatty acids protein 5	ELOVL5	2949	up
-0.591063	-1.00281	-0.697206	0.844065	0.869051	0.976109	+	Doc+_Doc-	13	13	13	32.5	32.5	32.5	56.882	0	143.93	607950000	27	2.55755	0	1.6601	7.22105	Q9UHR4	Q9UHR4	Brain-specific angiogenesis inhibitor 1-associated protein 2-like protein 1	BAIAP2L1	3057	up
1.52675	1.42896	1.73382	3.16278	3.15981	3.32065	+	Doc+_Doc-	18	18	18	52.7	52.7	52.7	47.355	0	258.14	3049700000	60	3.45617	0	1.65124	8.07852	O75955	O75955	Flotillin-1	FLOT1	363	up
-1.27442	-1.08495	-0.834108	0.342125	0.642389	0.76919	+	Doc+_Doc-	11	11	11	10.7	10.7	10.7	148.53	0	88.443	496650000	25	3.10604	0	1.64906	5.89563	P19174	P19174	1-phosphatidylinositol 4,5-bisphosphate phosphodiesterase gamma-1	PLCG1	713	up
2.91925	2.79029	2.60375	4.25893	4.44462	4.54124	+	Doc+_Doc-	15	15	14	65.1	65.1	65.1	27.893	0	219.01	6981100000	76	3.70867	0	1.64383	7.35538	Q9P0L0	Q9P0L0	Vesicle-associated membrane protein-associated protein A	VAPA	2974	up
1.70107	1.68174	1.86671	3.3049	3.39156	3.45518	+	Doc+_Doc-	21	21	21	57.7	57.7	57.7	47.064	0	232.25	3414600000	67	4.34846	0	1.63404	9.44022	Q14254	Q14254	Flotillin-2	FLOT2	1679	up
-0.857622	-0.791017	-0.810055	0.617126	0.808067	1.00794	+	Doc+_Doc-	5	5	5	43.7	43.7	43.7	15.278	0	55.269	574270000	17	2.41638	0	1.63061	7.60003	Q8N5K1	Q8N5K1	CDGSH iron-sulfur domain-containing protein 2	CISD2	2192	up
NaN	-1.63854	-1.3006	-0.591715	1.25924	-0.204704	+	Doc+_Doc-	11	11	10	13.5	13.5	12.8	137.91	0	95.789	409910000	19	1.0328	0.0127222	1.62384	2.35871	P04626	P04626	Receptor tyrosine-protein kinase erbB-2	ERBB2	495	up
1.1116	0.824594	1.21502	2.60108	2.62595	2.75725	+	Doc+_Doc-	11	11	11	24.9	24.9	24.9	54.847	0	82.546	2074300000	24	2.73904	0	1.61102	7.11465	P51648;P48448;P30838;P43353	P51648	Fatty aldehyde dehydrogenase	ALDH3A2	1146	up
-2.22886	-1.03737	-1.81377	-0.140263	-0.242111	0.0991096	+	Doc+_Doc-	10	10	9	9.6	9.6	8.9	154.79	0	69.545	309600000	11	1.44357	0.00305512	1.59892	3.44939	P08069	P08069	Insulin-like growth factor 1 receptor;Insulin-like growth factor 1 receptor alpha chain;Insulin-like growth factor 1 receptor beta chain	IGF1R	551	up
-1.09979	-1.15668	-1.71966	0.126312	0.370874	0.296228	+	Doc+_Doc-	9	9	8	22.5	22.5	21	62.411	0	100.54	396070000	25	2.06882	0	1.58985	5.11793	O75487	O75487	Glypican-4;Secreted glypican-4	GPC4	328	up
NaN	-3.5174	-3.51146	-2.72687	-1.55759	-1.49109	+	Doc+_Doc-	2	2	2	5.1	5.1	5.1	69.863	0	26.256	89757000	5	1.23479	0.00539871	1.58925	3.17017	Q9H6U8	Q9H6U8	Alpha-1,2-mannosyltransferase ALG9	ALG9	2764	up
-2.26304	-1.98682	-1.87878	-1.49761	0.051569	0.078989	+	Doc+_Doc-	6	6	6	34.3	34.3	34.3	22.417	0	44.864	260530000	14	1.062	0.0106195	1.58719	2.50568	O15498	O15498	Synaptobrevin homolog YKT6	YKT6	185	up
-1.24308	-1.00218	-0.915365	0.370573	0.519339	0.671999	+	Doc+_Doc-	5	5	5	54.4	54.4	54.4	19.536	0	100.81	471760000	13	3.5253	0	1.57418	6.81234	Q9Y3D2	Q9Y3D2	Methionine-R-sulfoxide reductase B2, mitochondrial	MSRB2	3209	up
-0.892017	-0.775924	-0.943991	0.652357	0.468647	0.949251	+	Doc+_Doc-	2	2	2	26.5	26.5	26.5	11.805	0.00035524	15.448	532500000	9	2.40209	0	1.56073	6.27889	Q9Y6A9	Q9Y6A9	Signal peptidase complex subunit 1	SPCS1	3283	up
-1.81218	-1.41844	-1.92245	0.0467796	-0.496536	-0.0251427	+	Doc+_Doc-	6	6	6	23.6	23.6	23.6	49.753	0	38.433	298740000	10	2.59641	0	1.55939	4.74004	Q9BZV1	Q9BZV1	UBX domain-containing protein 6	UBXN6	2686	up
-0.633358	-1.10916	-0.925812	0.566353	0.644539	0.782099	+	Doc+_Doc-	5	5	5	43.4	43.4	43.4	20.082	0	45.944	522440000	17	2.56786	0	1.55377	6.16023	P62330	P62330	ADP-ribosylation factor 6	ARF6	1326	up
1.29807	1.20958	1.3776	2.76815	2.77722	2.98411	+	Doc+_Doc-	23	23	23	24.7	24.7	24.7	155.2	0	323.31	2363700000	67	3.89454	0	1.54808	8.34065	O75694	O75694	Nuclear pore complex protein Nup155	NUP155	344	up
0.932076	0.8845	0.879215	2.33391	2.39747	2.56388	+	Doc+_Doc-	24	24	24	17.9	17.9	17.9	205.12	0	256.68	1779300000	69	2.92378	0	1.53316	8.98714	O15031	O15031	Plexin-B2	PLXNB2	150	up
0.492401	0.440211	0.720257	2.06725	2.00297	2.17422	+	Doc+_Doc-	13	11	11	20.9	19	19	97.016	0	112.05	1427500000	30	3.39193	0	1.53052	7.6743	P11171	P11171	Protein 4.1	EPB41	608	up
-3.45729	-3.21024	NaN	-1.96109	-1.83488	-1.62092	+	Doc+_Doc-	2	2	2	7.5	7.5	7.5	42.243	0	42.959	92938000	8	2.14258	0	1.52814	5.91207	Q9NVD7	Q9NVD7	Alpha-parvin	PARVA	2905	up
2.83074	2.81261	2.96723	4.25826	4.42416	4.50298	+	Doc+_Doc-	18	18	18	55.3	55.3	55.3	46.44	0	323.31	7021100000	93	3.81883	0	1.52494	8.15131	P50454	P50454	Serpin H1	SERPINH1	1118	up
-1.09378	-1.402	-1.196	0.0611134	0.34041	0.47208	+	Doc+_Doc-	3	3	3	14.9	14.9	14.9	37.866	0	39.066	405040000	12	3.09565	0	1.52179	6.05539	O15121	O15121	Sphingolipid delta(4)-desaturase DES1	DEGS1	158	up
-1.36223	-1.31727	-1.3678	0.0953426	0.0438004	0.375605	+	Doc+_Doc-	5	5	5	23.8	23.8	23.8	43.008	0	59.83	372110000	14	2.41474	0	1.52068	7.44249	P17302	P17302	Gap junction alpha-1 protein	GJA1	690	up
1.85715	1.67312	2.16585	3.33104	3.3211	3.6036	+	Doc+_Doc-	12	12	12	42.4	42.4	42.4	40.228	0	184.85	3536600000	39	2.75149	0	1.51988	5.60906	Q12907	Q12907	Vesicular integral-membrane protein VIP36	LMAN2	1549	up
-0.107458	0.0987387	0.00569916	1.3873	1.45742	1.7055	+	Doc+_Doc-	11	11	11	13.5	13.5	13.5	122.56	0	104.51	945310000	28	3.28471	0	1.51775	7.11043	Q14139	Q14139	Ubiquitin conjugation factor E4 A	UBE4A	1660	up
5.51083	5.36476	5.36775	6.79361	6.95526	7.0451	+	Doc+_Doc-	42	42	41	67.9	67.9	65.6	72.932	0	323.31	42145000000	345	3.74339	0	1.51688	8.0701	P13667	P13667	Protein disulfide-isomerase A4	PDIA4	644	up
1.70454	1.59323	1.63414	3.07391	3.11891	3.27252	+	Doc+_Doc-	20	20	20	43.4	43.4	43.4	68.436	0	232.59	2943900000	76	3.76672	0	1.51114	8.97625	Q06124	Q06124	Tyrosine-protein phosphatase non-receptor type 11	PTPN11	1489	up
-1.47114	-1.78181	-1.70533	-0.157799	-0.166065	-0.121185	+	Doc+_Doc-	5	5	4	20.8	20.8	18.5	44.424	0	74.124	298940000	8	2.48639	0	1.50441	7.73604	P36507	P36507	Dual specificity mitogen-activated protein kinase kinase 2	MAP2K2	935	up
-1.54306	-1.8448	-1.91236	-0.345842	-0.37606	-0.0663586	+	Doc+_Doc-	11	4	4	35.6	15.5	15.5	40.361	0	44.438	276000000	12	3.20854	0	1.50398	6.00735	P63096	P63096	Guanine nucleotide-binding protein G(i) subunit alpha-1	GNAI1	1363	up
3.91255	3.82867	3.85903	5.27604	5.39704	5.43424	+	Doc+_Doc-	39	39	27	61.2	61.2	44.5	67.819	0	323.31	13697000000	172	3.9844	0	1.50236	9.77561	P26038	P26038	Moesin	MSN	798	up
0.429605	-0.151294	0.309671	1.54737	1.84592	1.69733	+	Doc+_Doc-	5	5	5	15.9	15.9	15.9	36.034	0	55.793	1079300000	29	2.27658	0	1.50088	5.05478	Q9NZ01	Q9NZ01	Very-long-chain enoyl-CoA reductase	TECR	2953	up
0.6534	0.180533	0.437107	1.85088	1.88075	2.04126	+	Doc+_Doc-	7	7	7	57.6	57.6	57.6	19.206	0	121.57	1257200000	26	2.50686	0	1.50062	6.02883	O95881	O95881	Thioredoxin domain-containing protein 12	TXNDC12	455	up
-1.65555	-1.93399	-1.8178	-0.572683	-0.278748	-0.0716915	+	Doc+_Doc-	2	2	2	15.9	15.9	15.9	21.198	0	33.449	268340000	9	2.6089	0	1.49474	5.61364	Q6UW68	Q6UW68	Transmembrane protein 205	TMEM205	1995	up
-1.29245	-1.50892	-0.999254	-0.00233841	0.411398	0.270145	+	Doc+_Doc-	11	8	4	25.8	20.6	10.9	62.633	0	111.02	390080000	17	2.77364	0	1.49328	5.1282	Q99755	Q99755	Phosphatidylinositol 4-phosphate 5-kinase type-1 alpha	PIP5K1A	2564	up
-1.76177	-1.87665	-2.06208	0.104731	-1.02986	-0.335236	+	Doc+_Doc-	6	6	6	15.1	15.1	15.1	62.924	0	50.741	260150000	10	1.4104	0.00336716	1.48005	3.35112	O15270	O15270	Serine palmitoyltransferase 2	SPTLC2	171	up
-1.60315	-1.52572	-1.96382	-0.395531	-0.162237	-0.110256	+	Doc+_Doc-	6	6	6	14.3	14.3	14.3	39.641	0	41.527	284810000	14	2.80469	0	1.47489	5.65111	O75695	O75695	Protein XRP2	RP2	345	up
-1.84531	-1.16784	-1.63444	-0.158447	-0.31765	0.226501	+	Doc+_Doc-	8	8	8	15.7	15.7	15.7	103.13	0	83.631	315340000	15	2.2725	0	1.466	4.10408	O14786	O14786	Neuropilin-1	NRP1	126	up
2.57542	2.4266	2.59315	3.91163	3.89888	4.17281	+	Doc+_Doc-	22	22	21	51.9	51.9	50.3	50.679	0	317.99	5548400000	98	3.29776	0	1.46272	7.18029	Q16181;Q6ZU15	Q16181	Septin-7	SEPT7	1803	up
-1.84728	-1.70568	-1.74573	-0.359722	-0.390093	-0.163307	+	Doc+_Doc-	3	3	3	30.6	30.6	30.6	21	0	25.207	268870000	7	3.61755	0	1.46186	8.00445	O75884	O75884	Putative hydrolase RBBP9	RBBP9	356	up
-0.187511	-0.175246	-0.256485	1.05941	1.15616	1.54786	+	Doc+_Doc-	12	12	12	29.2	29.2	29.2	51.419	0	92.239	794120000	32	2.05588	0	1.46089	5.80983	Q13418	Q13418	Integrin-linked protein kinase	ILK	1602	up
-1.03576	-0.685355	-0.782213	0.445538	0.610615	0.771137	+	Doc+_Doc-	6	5	5	8.7	7.9	7.9	93.673	0	81.579	507770000	23	3.27103	0	1.44354	6.00147	Q8TCJ2	Q8TCJ2	Dolichyl-diphosphooligosaccharide--protein glycosyltransferase subunit STT3B	STT3B	2267	up
-2.44048	NaN	-2.37355	-0.513994	-0.834179	-1.5743	+	Doc+_Doc-	2	2	2	32.4	32.4	32.4	18.848	0	57.727	177310000	6	1.36217	0.00372843	1.43285	3.44633	P14209	P14209	CD99 antigen	CD99	656	up
0.789206	0.571506	0.661215	2.06917	2.01627	2.23412	+	Doc+_Doc-	12	12	12	36.2	36.2	36.2	56.777	0	268.36	1434500000	49	4.01625	0	1.43255	7.49755	Q92575	Q92575	UBX domain-containing protein 4	UBXN4	2326	up
1.75459	1.37723	1.19771	2.84848	2.86605	2.90019	+	Doc+_Doc-	8	8	7	48.2	48.2	42.4	21.258	0	66.418	2445100000	38	1.90696	0.000454343	1.4284	5.39419	P60953;P17081;Q9H4E5	P60953	Cell division control protein 42 homolog	CDC42	1258	up
2.60102	2.49191	2.56334	3.96859	3.84218	4.11347	+	Doc+_Doc-	8	8	8	29	29	29	43.159	0	113.82	5244300000	31	3.03954	0	1.42266	7.70452	Q9P035	Q9P035	Very-long-chain (3R)-3-hydroxyacyl-CoA dehydratase 3	HACD3	2969	up
1.87679	1.98809	2.14277	3.43952	3.396	3.43301	+	Doc+_Doc-	16	16	9	50.4	50.4	26.4	50.67	0	274.83	3582300000	60	2.6387	0	1.42029	7.96566	P42167	P42167	Lamina-associated polypeptide 2, isoforms beta/gamma;Thymopoietin;Thymopentin	TMPO	992	up
-1.58802	-1.33714	-1.51596	-1.15684	0.45657	0.496313	+	Doc+_Doc-	3	3	3	14.4	14.4	14.4	26.005	0	25.489	348410000	10	0.922769	0.0204833	1.41239	2.17414	Q9Y3A6	Q9Y3A6	Transmembrane emp24 domain-containing protein 5	TMED5	3202	up
-1.88719	-1.95275	-1.96396	-0.678865	-0.434193	-0.458826	+	Doc+_Doc-	3	3	3	15.6	15.6	15.6	31.642	0	62.451	232460000	10	2.83049	0	1.41067	7.77747	Q86Y82	Q86Y82	Syntaxin-12	STX12	2114	up
0.25378	0.0425196	0.136389	1.34218	1.46717	1.85	+	Doc+_Doc-	7	7	7	31.7	31.7	31.7	29.702	0	75.915	982180000	24	2.26137	0	1.40889	5.32592	Q9Y5M8	Q9Y5M8	Signal recognition particle receptor subunit beta	SRPRB	3259	up
0.961374	0.91735	0.931631	2.29641	2.26097	2.44938	+	Doc+_Doc-	13	13	13	32.6	32.6	32.6	60.593	0	154.13	1686200000	51	2.96362	0	1.3988	8.78396	Q9H3P7	Q9H3P7	Golgi resident protein GCP60	ACBD3	2747	up
3.50129	3.4394	3.42235	4.86304	4.7569	4.93485	+	Doc+_Doc-	18	18	18	53.7	53.7	53.7	38.604	0	323.31	9660200000	99	3.65	0	1.39725	8.90075	P07355;A6NMY6	P07355;A6NMY6	Annexin A2;Putative annexin A2-like protein	ANXA2;ANXA2P2	536	up
2.21661	2.315	2.5443	3.7248	3.6496	3.88927	+	Doc+_Doc-	48	48	48	35	35	35	206.8	0	323.31	4523700000	135	3.29247	0	1.39592	6.34115	P55196	P55196	Afadin	MLLT4	1218	up
-1.1194	-2.84313	-1.17249	-0.114168	-0.585028	-0.260918	+	Doc+_Doc-	6	6	6	17.8	17.8	17.8	55.299	0	50.732	275880000	11	0.899633	0.022	1.39164	2.0382	Q9Y6M5	Q9Y6M5	Zinc transporter 1	SLC30A1	3295	up
0.931662	0.410008	0.55724	1.84718	2.00799	2.19161	+	Doc+_Doc-	7	7	5	46.5	46.5	36.9	22.367	0	155.7	1356000000	31	2.5044	0	1.38262	4.86119	Q9NR31	Q9NR31	GTP-binding protein SAR1a	SAR1A	2856	up
-0.990635	-0.622554	-0.88377	0.576176	0.329762	0.730854	+	Doc+_Doc-	9	9	9	28.2	28.2	28.2	59.745	0	91.565	490260000	16	2.99217	0	1.37792	5.30018	Q8NHP6	Q8NHP6	Motile sperm domain-containing protein 2	MOSPD2	2250	up
-1.07719	-1.09647	-0.987989	0.328308	0.191235	0.451933	+	Doc+_Doc-	6	6	6	29	29	29	34.833	0	58.04	419390000	21	3.12848	0	1.37771	7.55438	Q15006	Q15006	ER membrane protein complex subunit 2	EMC2	1724	up
1.06338	1.29533	1.27679	2.58463	2.4865	2.69607	+	Doc+_Doc-	25	25	25	35.9	35.9	35.9	112.03	0	262.99	2015900000	68	3.75269	0	1.37724	7.02911	Q16513	Q16513	Serine/threonine-protein kinase N2	PKN2	1808	up
0.925699	0.586513	0.646236	1.89814	2.14412	2.23482	+	Doc+_Doc-	8	7	6	43	37.5	34	22.541	0	97.355	1431200000	36	3.15465	0	1.37288	5.60206	P61026	P61026	Ras-related protein Rab-10	RAB10	1267	up
-0.775679	-0.796165	-0.603264	0.66564	0.371099	0.898809	+	Doc+_Doc-	3	3	3	13.6	13.6	13.6	36.187	0	36.385	526610000	17	2.23196	0	1.37022	5.18083	Q06136	Q06136	3-ketodihydrosphingosine reductase	KDSR	1490	up
-1.36249	-1.06403	-1.18152	-0.0289116	0.0675392	0.463549	+	Doc+_Doc-	8	8	8	18.7	18.7	18.7	72.379	0	73.739	377250000	19	2.47071	0	1.37007	5.00229	Q8WVM8	Q8WVM8	Sec1 family domain-containing protein 1	SCFD1	2301	up
-0.740707	-0.476287	-0.446161	0.745235	0.785883	0.877983	+	Doc+_Doc-	8	8	8	22.8	22.8	22.8	49.654	0	76.856	585590000	17	2.80616	0	1.35742	6.73749	Q96CW1	Q96CW1	AP-2 complex subunit mu	AP2M1	2412	up
0.527531	0.0995626	0.0698967	1.43478	1.58188	1.75198	+	Doc+_Doc-	6	4	4	43.3	27.2	27.2	20.511	0	56.04	1011500000	12	2.52853	0	1.35722	4.95426	P18085	P18085	ADP-ribosylation factor 4	ARF4	703	up
-2.48524	-2.35019	-1.94379	-1.05551	-0.645157	-1.02286	+	Doc+_Doc-	6	6	6	11.2	11.2	11.2	94.178	0	53.036	181210000	9	2.46561	0	1.35189	4.37052	Q86TV6	Q86TV6	Tetratricopeptide repeat protein 7B	TTC7B	2083	up
-0.96504	NaN	-1.21561	0.336973	0.224106	0.217239	+	Doc+_Doc-	6	6	6	20.1	20.1	20.1	34.96	0	43.921	390080000	11	1.38701	0.00486933	1.34976	5.83907	Q8IZ81	Q8IZ81	ELMO domain-containing protein 2	ELMOD2	2158	up
0.876886	0.828023	0.903242	2.17639	2.08829	2.39118	+	Doc+_Doc-	15	15	15	31.9	31.9	31.9	70.729	0	214.8	1563300000	46	2.53733	0	1.34924	7.00504	Q9UHB9	Q9UHB9	Signal recognition particle subunit SRP68	SRP68	3046	up
-1.64747	-1.62005	-2.22744	-0.163296	-0.745199	-0.551641	+	Doc+_Doc-	10	10	10	15.2	15.2	15.2	101.37	0	64.443	244680000	12	2.14328	0	1.34494	3.71821	Q5JSH3	Q5JSH3	WD repeat-containing protein 44	WDR44	1886	up
-1.54446	-1.91133	-1.80429	-0.482052	-0.371143	-0.376619	+	Doc+_Doc-	7	7	4	3.9	3.9	2.2	211.06	0	49.703	253340000	14	2.47238	0	1.34342	6.25576	Q9UIW2;Q9HCM2;O75051	Q9UIW2	Plexin-A1	PLXNA1	3068	up
1.19417	1.20998	1.10433	2.36393	2.44929	2.70234	+	Doc+_Doc-	10	10	6	31.5	31.5	20.3	49.398	0	116.41	1908800000	39	2.52658	0	1.33569	6.45874	Q9NVA2	Q9NVA2	Septin-11	SEPT11	2904	up
-2.99831	-3.64582	NaN	-1.83743	-2.2096	-1.91309	+	Doc+_Doc-	4	4	4	7.6	7.6	7.6	90.063	0	31.878	82946000	9	0.920182	0.021363	1.33536	3.01372	O94901	O94901	SUN domain-containing protein 1	SUN1	388	up
-1.07625	-1.33562	NaN	-0.0117359	0.172573	0.224085	+	Doc+_Doc-	12	12	12	16.1	16.1	16.1	135.78	0	137.19	361660000	21	1.65333	0.00320141	1.33424	5.37719	Q13136	Q13136	Liprin-alpha-1	PPFIA1	1574	up
-1.478	-1.50932	-0.723326	0.00967789	0.0711575	0.210361	+	Doc+_Doc-	6	5	5	45	39.3	39.3	21.308	0	79.432	361370000	22	1.52495	0.00313409	1.33395	3.66766	P84095	P84095	Rho-related GTP-binding protein RhoG	RHOG	1415	up
0.599791	0.655	0.558985	1.69193	1.93009	2.18592	+	Doc+_Doc-	8	8	8	49.8	49.8	49.8	24.347	0	112.57	1290600000	30	2.03443	0	1.33139	5.42713	Q9UL25	Q9UL25	Ras-related protein Rab-21	RAB21	3096	up
-0.274008	0.0843039	NaN	NaN	1.44825	1.01954	+	Doc+_Doc-	2	2	2	19.7	19.7	19.7	16.735	0.00035651	15.583	662500000	5	1.35618	0.00451029	1.32875	3.50257	P62837;P61077;Q9Y2X8;P51668	P62837;P61077;Q9Y2X8;P51668	Ubiquitin-conjugating enzyme E2 D2;Ubiquitin-conjugating enzyme E2 D3;Ubiquitin-conjugating enzyme E2 D4;Ubiquitin-conjugating enzyme E2 D1	UBE2D2;UBE2D3;UBE2D4;UBE2D1	1269	up
-0.956831	-1.1711	-0.788433	0.116673	0.316692	0.635241	+	Doc+_Doc-	3	3	3	12.6	12.6	12.6	27.978	0	28.237	432160000	8	2.54191	0	1.32832	4.62434	P57088	P57088	Transmembrane protein 33	TMEM33	1238	up
-1.8479	-1.73964	-1.28614	-0.516565	-0.22382	-0.153164	+	Doc+_Doc-	6	5	5	21.4	19.3	19.3	39.154	0	54.744	274810000	13	2.30656	0	1.32671	4.35131	Q4G0F5	Q4G0F5	Vacuolar protein sorting-associated protein 26B	VPS26B	1854	up
1.96472	1.90877	1.90419	3.14327	3.21278	3.40071	+	Doc+_Doc-	29	24	23	37.8	33.9	32.9	120.68	0	323.31	3205600000	75	2.68489	0	1.32636	7.39673	Q9Y2J2	Q9Y2J2	Band 4.1-like protein 3;Band 4.1-like protein 3, N-terminally processed	EPB41L3	3174	up
0.23415	0.0819349	0.150402	1.40539	1.42184	1.61363	+	Doc+_Doc-	13	13	13	20.8	20.8	20.8	84.87	0	163.7	938930000	41	3.69105	0	1.32479	7.35872	P02786	P02786	Transferrin receptor protein 1;Transferrin receptor protein 1, serum form	TFRC	481	up
1.85752	1.77498	2.02115	3.13574	3.16478	3.31503	+	Doc+_Doc-	6	5	2	34.4	28.6	14.6	21.45	0	39.073	3157900000	26	3.70241	0	1.32063	6.90663	P63000	P63000	Ras-related C3 botulinum toxin substrate 1	RAC1	1360	up
-3.00026	NaN	-2.76677	-1.84908	-1.31383	-1.54089	+	Doc+_Doc-	2	2	2	7.5	7.5	7.5	28.368	0	17.587	111420000	8	2.17767	0	1.31558	4.47278	Q6Y1H2	Q6Y1H2	Very-long-chain (3R)-3-hydroxyacyl-CoA dehydratase 2	HACD2	2003	up
0.550049	0.0420389	0.271364	1.46846	1.53519	1.7887	+	Doc+_Doc-	16	16	16	21.1	21.1	21.1	116.2	0	175.32	1021900000	34	2.52428	0	1.30963	4.73953	O94832	O94832	Unconventional myosin-Id	MYO1D	382	up
1.44031	1.4406	1.39103	2.71279	2.64405	2.82581	+	Doc+_Doc-	24	24	24	22.7	22.7	22.7	177.19	0	282.24	2247900000	66	3.15051	0	1.30357	8.38372	Q9NYU2	Q9NYU2	UDP-glucose:glycoprotein glucosyltransferase 1	UGGT1	2951	up
-0.483356	-0.39957	-0.503212	0.696135	0.917856	0.885559	+	Doc+_Doc-	3	3	3	35.1	35.1	35.1	11.203	0	38.379	602380000	19	3.19161	0	1.29523	7.35508	P60903	P60903	Protein S100-A10	S100A10	1257	up
-0.0993919	-0.364144	0.0515289	0.981102	1.17826	1.31043	+	Doc+_Doc-	9	8	8	25.7	21.7	21.7	55.756	0	106.09	753970000	22	2.85263	0	1.29393	5.08138	Q92599	Q92599	Septin-8	SEPT8	2329	up
-1.1298	-1.3148	-0.985651	0.1509	0.127308	0.164959	+	Doc+_Doc-	8	8	8	18.7	18.7	18.7	77.86	0	90.027	374920000	14	2.30691	0	1.29114	6.59104	Q96AC1;Q9BQL6	Q96AC1	Fermitin family homolog 2	FERMT2	2387	up
0.361847	0.156692	0.561502	1.50227	1.63789	1.80748	+	Doc+_Doc-	5	5	5	43.5	43.5	43.5	17.328	0	62.645	1060700000	20	2.89721	0	1.2892	5.23077	Q99471	Q99471	Prefoldin subunit 5	PFDN5	2537	up
-1.76725	-2.1345	-2.43966	-1.19137	-0.743023	-0.553274	+	Doc+_Doc-	8	3	3	42.5	19.3	19.3	23.584	0	37.52	192100000	18	2.04187	0	1.28458	3.46021	Q92930	Q92930	Ras-related protein Rab-8B	RAB8B	2360	up
3.1525	3.33532	3.33593	4.45038	4.50348	4.7139	+	Doc+_Doc-	30	30	27	54.5	54.5	49.1	81.744	0	323.31	7988100000	128	3.47685	0	1.28133	6.3749	P14923	P14923	Junction plakoglobin	JUP	668	up
3.23333	3.08527	3.20231	4.42778	4.41317	4.50642	+	Doc+_Doc-	47	47	42	58.4	58.4	54.1	112.59	0	323.31	7394300000	174	4.1859	0	1.27548	8.30488	O43491	O43491	Band 4.1-like protein 2	EPB41L2	211	up
-0.0278358	-0.0990858	-0.0469322	1.13686	1.17296	1.31925	+	Doc+_Doc-	10	10	10	20.2	20.2	20.2	76.749	0	107.44	782930000	24	3.23176	0	1.26764	7.93812	P17252;P05771;P05129	P17252	Protein kinase C alpha type	PRKCA	689	up
1.30586	1.02728	1.43867	2.53886	2.41222	2.60625	+	Doc+_Doc-	13	13	13	26.3	26.3	26.3	56.92	0	144.49	1946100000	47	2.50073	0	1.26184	5.39486	Q96JB5	Q96JB5	CDK5 regulatory subunit-associated protein 3	CDK5RAP3	2476	up
-0.94101	-0.789794	-0.823566	0.35004	0.428097	0.443771	+	Doc+_Doc-	4	4	4	24.4	24.4	24.4	23.025	0	62.563	449800000	16	4.11994	0	1.25876	8.16191	Q15286	Q15286	Ras-related protein Rab-35	RAB35	1755	up
-1.07242	-0.994336	-1.40417	-0.161264	0.0625153	0.361576	+	Doc+_Doc-	6	6	6	11.1	11.1	11.1	99.808	0	70.738	361980000	18	2.44627	0	1.24459	4.19364	P19022;P55283	P19022	Cadherin-2	CDH2	712	up
1.04355	0.924148	1.08218	2.23033	2.18925	2.34826	+	Doc+_Doc-	18	18	18	21.6	21.6	21.6	121.68	0	209.78	1622600000	60	4.29023	0	1.23932	7.40643	O00159	O00159	Unconventional myosin-Ic	MYO1C	49	up
0.10317	0.244485	NaN	1.29092	1.40827	1.53599	+	Doc+_Doc-	3	3	3	10.6	10.6	10.6	52.259	0	46.95	866090000	12	2.70666	0	1.2379	6.18941	O95864	O95864	Fatty acid desaturase 2	FADS2	452	up
0.629086	0.604924	0.676844	1.81649	1.88973	1.90783	+	Doc+_Doc-	11	11	11	26.4	26.4	26.4	56.805	0	124.87	1244100000	37	5.11392	0	1.2344	9.14253	Q16850	Q16850	Lanosterol 14-alpha demethylase	CYP51A1	1833	up
-1.16512	-1.3562	-0.980917	0.283138	0.627157	-0.710419	+	Doc+_Doc-	7	7	7	12.6	12.6	12.6	77.15	0	50.159	385320000	12	1.08381	0.0124295	1.23404	2.39437	Q6NUQ4	Q6NUQ4	Transmembrane protein 214	TMEM214	1963	up
1.20392	1.3975	1.47932	2.55253	2.54878	2.67653	+	Doc+_Doc-	19	19	19	36.5	36.5	36.5	75.472	0	212.39	2052000000	60	3.03979	0	1.23236	6.42497	Q9Y450	Q9Y450	HBS1-like protein	HBS1L	3219	up
-0.938314	-1.10125	-1.11176	0.373749	-0.614992	0.783451	+	Doc+_Doc-	3	3	3	12.8	12.8	12.8	26.21	0	19.721	406080000	9	1.02333	0.0157394	1.23117	2.37289	Q9BVC6	Q9BVC6	Transmembrane protein 109	TMEM109	2633	up
0.0206985	-0.0185556	0.172344	1.16411	1.15163	1.54689	+	Doc+_Doc-	5	5	5	33.8	33.8	33.8	16.648	0	71.612	831160000	19	2.35951	0	1.22938	5.07625	Q9UHV9	Q9UHV9	Prefoldin subunit 2	PFDN2	3059	up
2.01266	1.78814	1.78033	2.98273	3.07864	3.18406	+	Doc+_Doc-	28	15	15	44.8	26.9	26.9	68.563	0	163.1	2882100000	58	3.49113	0	1.22143	6.23731	P35241	P35241	Radixin	RDX	913	up
-1.23483	-0.660832	-1.03486	0.489403	0.714542	-0.481199	+	Doc+_Doc-	7	7	7	28.2	28.2	28.2	36.032	0	45.468	431240000	8	1.20781	0.00819976	1.21776	2.41816	P30519	P30519	Heme oxygenase 2	HMOX2	867	up
-2.51623	-2.00161	-1.78813	-1.15623	-0.937344	-0.567659	+	Doc+_Doc-	4	4	4	12.2	12.2	12.2	55.08	0	54.165	185440000	13	1.88459	0.00043038	1.21491	3.23083	Q8IZP0	Q8IZP0	Abl interactor 1	ABI1	2162	up
3.16379	2.91581	2.93138	4.08422	4.32624	4.24135	+	Doc+_Doc-	35	24	23	51.2	37.2	35.8	69.412	0	278.3	6353200000	95	3.42683	0	1.21361	5.86182	P15311	P15311	Ezrin	EZR	674	up
-0.0553284	-0.0621119	0.225912	1.28547	1.23003	1.23054	+	Doc+_Doc-	10	10	10	14	14	14	89.42	0	130.97	811870000	26	2.32238	0	1.21252	6.16546	P22059;Q969R2	P22059	Oxysterol-binding protein 1	OSBP	748	up
2.99411	2.85754	3.07939	4.09097	4.17926	4.29778	+	Doc+_Doc-	18	18	18	69.3	69.3	69.3	41.487	0	323.31	6285300000	81	3.77604	0	1.21233	6.44469	Q15019	Q15019	Septin-2	SEPT2	1727	up
-0.630013	-0.685811	-0.311802	0.490108	0.501093	1.00975	+	Doc+_Doc-	7	4	4	24.7	18	18	49.716	0	57.224	543700000	17	2.19927	0	1.20953	3.93663	Q14141	Q14141	Septin-6	SEPT6	1661	up
-0.703993	-0.953368	-1.02431	0.170675	0.441381	0.306475	+	Doc+_Doc-	5	5	5	8.6	8.6	8.6	79.697	0	42.36	423490000	18	3.09258	0	1.20007	5.34158	Q9BU23	Q9BU23	Lipase maturation factor 2	LMF2	2618	up
-1.59587	-1.3912	-1.61752	-0.398647	-0.439411	-0.182301	+	Doc+_Doc-	6	6	6	9.3	9.3	9.3	99.632	0	49.736	269640000	8	3.40411	0	1.19474	5.7568	P22681	P22681	E3 ubiquitin-protein ligase CBL	CBL	759	up
-1.64104	-1.95906	-2.0713	-0.756102	-0.680099	-0.680122	+	Doc+_Doc-	8	3	3	49.5	22.2	22.2	24.214	0	44.673	210010000	13	2.02211	0.000459459	1.18503	5.12287	Q8WUD1	Q8WUD1	Ras-related protein Rab-2B	RAB2B	2290	up
0.225994	0.172587	0.388329	1.45544	1.38156	1.49884	+	Doc+_Doc-	13	13	8	15.8	15.8	9.7	138.75	0	121.38	931640000	40	3.31285	0	1.18298	6.82419	P20020;Q16720;Q01814	P20020	Plasma membrane calcium-transporting ATPase 1	ATP2B1	722	up
-2.94013	-2.93024	-2.84842	-2.05613	-1.46617	-1.65898	+	Doc+_Doc-	3	3	3	12.9	12.9	12.9	35.119	0	38.03	104340000	6	1.72747	0.00307468	1.17917	4.2709	Q6IAN0	Q6IAN0	Dehydrogenase/reductase SDR family member 7B	DHRS7B	1950	up
-1.21304	-1.16451	-1.03437	-0.0389805	-0.0909023	0.243584	+	Doc+_Doc-	3	3	3	56.9	56.9	56.9	8.0061	0	39.388	351310000	11	2.6705	0	1.1752	5.42024	Q9UBI6	Q9UBI6	Guanine nucleotide-binding protein G(I)/G(S)/G(O) subunit gamma-12	GNG12	3007	up
-2.29287	-2.14361	-2.30559	-0.620228	-0.822874	-1.79243	+	Doc+_Doc-	4	4	4	22	22	22	28.783	0	42.011	173390000	11	1.09143	0.0125157	1.16885	2.51128	Q96EY5	Q96EY5	Multivesicular body subunit 12A	MVB12A	2438	up
-1.75019	-1.95522	-2.05232	-1.59901	-0.0894718	-0.571507	+	Doc+_Doc-	5	5	5	16.1	16.1	16.1	54.858	0	40.111	217950000	8	0.939683	0.021139	1.16591	2.10465	Q96DZ1	Q96DZ1	Endoplasmic reticulum lectin 1	ERLEC1	2423	up
-2.05672	-2.16929	NaN	-0.0657978	-1.43193	-1.34468	+	Doc+_Doc-	2	2	2	14.2	14.2	14.2	24.171	0.00066578	12.854	190510000	4	0.934358	0.0213424	1.16553	2.13809	Q9NWM8	Q9NWM8	Peptidyl-prolyl cis-trans isomerase FKBP14	FKBP14	2918	up
-0.659334	-0.972665	-0.949142	0.302801	0.127041	0.467279	+	Doc+_Doc-	4	4	4	11.2	11.2	11.2	52.764	0	55.577	422480000	21	2.92572	0	1.15942	4.81652	Q96N66	Q96N66	Lysophospholipid acyltransferase 7	MBOAT7	2493	up
-0.996164	NaN	-1.52472	-0.764576	0.8948	-0.434954	+	Doc+_Doc-	8	8	8	18.2	18.2	18.2	77.243	0	64.965	344730000	10	0.84861	0.0295778	1.15887	1.72472	O00213;Q92870	O00213	Amyloid beta A4 precursor protein-binding family B member 1	APBB1	57	up
0.0554314	0.0109015	0.145359	1.17426	1.2296	1.27949	+	Doc+_Doc-	19	19	19	27.5	27.5	27.5	104.06	0	170.12	815580000	36	4.46417	0	1.15722	7.72129	Q6P1N0	Q6P1N0	Coiled-coil and C2 domain-containing protein 1A	CC2D1A	1971	up
1.20178	1.02654	1.38599	2.34061	2.33359	2.41125	+	Doc+_Doc-	16	16	14	27.6	27.6	24.5	100.07	0	234.63	1772100000	39	2.24489	0	1.15705	5.59774	P35221	P35221	Catenin alpha-1	CTNNA1	908	up
-2.11409	NaN	-2.50431	-1.45713	-1.07387	-0.928598	+	Doc+_Doc-	3	3	3	27	27	27	15.824	0	21.659	151990000	9	1.45641	0.00327431	1.156	3.29497	Q7Z5G4	Q7Z5G4	Golgin subfamily A member 7	GOLGA7	2065	up
-0.608994	-0.716388	-0.497223	0.522827	0.421352	0.676788	+	Doc+_Doc-	6	6	6	17.5	17.5	17.5	41.488	0	73.098	499530000	16	3.46466	0	1.14786	5.8103	Q8TCT9	Q8TCT9	Minor histocompatibility antigen H13	HM13	2269	up
-1.16327	-1.75304	-1.17437	-0.229874	-0.401928	-0.021883	+	Doc+_Doc-	9	9	9	16	16	16	100.58	0	153.01	296420000	23	1.89608	0.000681913	1.14567	3.54016	P98194	P98194	Calcium-transporting ATPase type 2C member 1	ATP2C1	1422	up
-1.68899	-1.84976	-1.10345	-0.408112	0.298525	-1.12043	+	Doc+_Doc-	12	12	12	11	11	11	196.54	0	108.68	281900000	11	1.0454	0.0154833	1.1374	2.00175	Q9ULH0	Q9ULH0	Kinase D-interacting substrate of 220 kDa	KIDINS220	3105	up
2.78042	3.15885	2.78391	3.75891	4.09505	4.2692	+	Doc+_Doc-	10	2	2	24.5	7.4	7.4	49.775	0	174.62	5727600000	17	2.31682	0	1.13333	3.83612	Q3ZCM7	Q3ZCM7	Tubulin beta-8 chain	TUBB8	1852	up
-2.99536	NaN	-3.05509	-2.02708	-2.07673	-1.58259	+	Doc+_Doc-	2	2	2	7.6	7.6	7.6	56.252	0	18.559	89221000	10	1.79175	0.00275236	1.12976	4.34678	Q9BVG9	Q9BVG9	Phosphatidylserine synthase 2	PTDSS2	2635	up
0.67802	0.328	0.486843	1.57299	1.57033	1.70652	+	Doc+_Doc-	9	9	9	41	41	41	29.815	0	96.175	1056500000	37	2.53399	0	1.11899	5.3102	O15400	O15400	Syntaxin-7	STX7	183	up
-0.422531	-0.15759	-0.43495	0.476118	0.653755	1.2054	+	Doc+_Doc-	9	9	9	20.8	20.8	20.8	67.993	0	72.705	595990000	22	1.62557	0.00305565	1.11678	3.30935	P08195	P08195	4F2 cell-surface antigen heavy chain	SLC3A2	554	up
-2.92232	-2.5317	-3.0154	-1.83232	NaN	-1.58199	+	Doc+_Doc-	2	2	2	6	6	6	39.309	0	20.372	86067000	8	1.94544	0.000435897	1.11598	3.79628	Q70UQ0	Q70UQ0	Inhibitor of nuclear factor kappa-B kinase-interacting protein	IKBIP	2015	up
-2.76452	-2.35412	-1.99849	-1.51339	-1.56172	-0.694384	+	Doc+_Doc-	7	7	7	5.1	5.1	5.1	170.77	0	49.715	147360000	13	1.41626	0.00442164	1.11588	2.43637	Q9Y2E4	Q9Y2E4	Disco-interacting protein 2 homolog C	DIP2C	3168	up
-0.54141	-0.483438	-0.202173	0.647659	0.66715	0.805201	+	Doc+_Doc-	8	8	8	17.6	17.6	17.6	59.151	0	85.819	562330000	25	2.53444	0	1.11568	5.16746	Q8NF37	Q8NF37	Lysophosphatidylcholine acyltransferase 1	LPCAT1	2240	up
0.582125	0.599263	0.699333	1.66202	1.73416	1.8248	+	Doc+_Doc-	7	7	7	33	33	33	22.658	0	57.844	1150800000	20	4.12683	0	1.11342	6.97579	P61758	P61758	Prefoldin subunit 3	VBP1	1292	up
3.11131	2.74201	2.95971	3.902	4.21712	4.01494	+	Doc+_Doc-	12	12	12	39.7	39.7	39.7	24.146	0	127.92	5803500000	65	2.80352	0	1.10701	4.58653	P61313	P61313	60S ribosomal protein L15	RPL15	1283	up
-2.6944	-3.73189	-3.17074	-2.00296	-2.10371	-2.17206	+	Doc+_Doc-	2	2	2	7.4	7.4	7.4	37.318	0	16.897	81841000	9	1.20267	0.00922506	1.1061	2.73904	Q9H6V9	Q9H6V9	UPF0554 protein C2orf43	C2orf43	2765	up
-2.12382	NaN	-2.26117	-0.840168	-1.92482	-0.499382	+	Doc+_Doc-	7	7	7	15.5	15.5	15.5	57.625	0	40.165	169440000	9	0.918768	0.0236777	1.10437	2.06343	Q9BYI3;Q8IXS8	Q9BYI3	Hyccin	FAM126A	2671	up
-0.0817566	0.0556746	0.0332279	1.15434	0.86216	1.30224	+	Doc+_Doc-	5	5	5	47.5	47.5	47.5	19.193	0	94.229	745030000	21	2.08875	0	1.10386	4.67498	Q9Y3E5	Q9Y3E5	Peptidyl-tRNA hydrolase 2, mitochondrial	PTRH2	3210	up
-0.501348	-0.938519	-0.638704	0.315952	0.225355	0.681147	+	Doc+_Doc-	5	5	5	53	53	53	11.309	0	42.822	459170000	14	2.34769	0	1.10034	3.79544	Q15836;P63027;P23763	Q15836	Vesicle-associated membrane protein 3	VAMP3	1800	up
0.496077	0.326282	0.648918	1.44912	1.6699	1.63004	+	Doc+_Doc-	9	6	5	55.8	40.9	37.7	23.707	0	100.6	1036800000	33	2.97715	0	1.0926	5.07445	P61020	P61020	Ras-related protein Rab-5B	RAB5B	1265	up
-1.16804	-1.33179	-1.31426	-1.14761	-0.071043	0.675644	+	Doc+_Doc-	2	2	2	17.2	17.2	17.2	27.567	0	40.119	330350000	7	0.758509	0.043396	1.09036	1.72599	Q9GZP9	Q9GZP9	Derlin-2	DERL2	2700	up
1.6234	1.69959	1.68479	2.80065	2.62498	2.85147	+	Doc+_Doc-	10	10	10	72.1	72.1	72.1	22.837	0	164	2366700000	44	2.75289	0	1.08977	6.31861	P51151;Q9NP90	P51151	Ras-related protein Rab-9A	RAB9A	1135	up
2.08152	1.81059	2.0417	2.9926	2.97065	3.23351	+	Doc+_Doc-	26	26	26	37.5	37.5	37.5	89.594	0	323.31	2893800000	99	3.0958	0	1.08765	4.96048	O94874	O94874	E3 UFM1-protein ligase 1	UFL1	385	up
0.98665	0.922433	0.976505	1.98551	1.89236	2.26904	+	Doc+_Doc-	17	17	17	23	23	23	128.4	0	205.88	1431000000	47	2.0438	0.000443478	1.08711	5.05601	Q9P2R3	Q9P2R3	Rabankyrin-5	ANKFY1	2995	up
-1.89814	-1.37442	-1.80404	-0.614077	-0.621063	-0.589848	+	Doc+_Doc-	6	6	6	16.2	16.2	16.2	55.866	0	52.829	227380000	11	1.67561	0.00310806	1.08387	4.14525	P86791;P86790	P86791;P86790	Vacuolar fusion protein CCZ1 homolog;Vacuolar fusion protein CCZ1 homolog B	CCZ1;CCZ1B	1418	up
-1.63208	-2.08425	-1.73045	-0.940491	-0.861639	-0.437134	+	Doc+_Doc-	5	5	5	18.4	18.4	18.4	51.172	0	43.511	207280000	13	2.14848	0	1.06917	3.47083	Q9H993	Q9H993	Protein-glutamate O-methyltransferase	ARMT1	2786	up
-0.0895424	-0.287923	0.261553	0.938925	1.0267	1.12082	+	Doc+_Doc-	3	3	3	37.5	37.5	37.5	9.9743	0	27.64	708090000	13	1.83164	0.00232308	1.06745	3.96799	P60468	P60468	Protein transport protein Sec61 subunit beta	SEC61B	1249	up
-1.33127	-1.18566	-1.13825	-0.453964	0.0354195	-0.0394516	+	Doc+_Doc-	5	5	5	9.9	9.9	9.9	83.184	0	41.499	313610000	8	1.93966	0.000672131	1.06573	4.05381	Q96SU4	Q96SU4	Oxysterol-binding protein-related protein 9	OSBPL9	2523	up
-2.13812	-1.92671	-1.67887	-1.75749	-0.38509	-0.407364	+	Doc+_Doc-	5	5	5	7.8	7.8	7.8	85.862	0	36.646	204510000	11	0.871118	0.0278521	1.06458	1.85853	Q12797	Q12797	Aspartyl/asparaginyl beta-hydroxylase	ASPH	1537	up
NaN	-1.80448	-1.85737	-0.992069	-0.546583	-0.767178	+	Doc+_Doc-	6	6	6	20.1	20.1	20.1	47.739	0	55.78	197890000	9	1.92881	0.00177154	1.06231	4.59292	Q9C0E8	Q9C0E8	Protein lunapark	LNP	2694	up
-0.378807	-0.0870562	-0.0361443	0.848873	0.928022	0.902725	+	Doc+_Doc-	16	14	14	12	11	11	194.31	0	122.25	645010000	27	2.11404	0.000216704	1.06054	5.06773	Q9Y5S2;Q6DT37	Q9Y5S2	Serine/threonine-protein kinase MRCK beta	CDC42BPB	3263	up
-0.284285	0.0735254	-0.143723	0.642405	1.05452	1.12821	+	Doc+_Doc-	3	3	3	8.9	8.9	8.9	44.876	0	20.915	669040000	8	2.19375	0	1.05987	3.73821	Q96G23	Q96G23	Ceramide synthase 2	CERS2	2446	up
-1.52706	-1.79181	-1.38157	-0.625858	-0.553488	-0.358143	+	Doc+_Doc-	5	5	5	22.7	22.7	22.7	43.955	0	38.909	243380000	12	2.50334	0	1.05432	4.31628	Q9H488	Q9H488	GDP-fucose protein O-fucosyltransferase 1	POFUT1	2751	up
0.610161	0.0916548	0.625959	1.58716	1.40375	1.49059	+	Doc+_Doc-	12	6	5	37.9	20.6	17.8	40.532	0	78.463	983160000	18	1.70725	0.00319014	1.05124	3.71009	P08754	P08754	Guanine nucleotide-binding protein G(k) subunit alpha	GNAI3	566	up
2.06531	1.89467	1.87136	2.96857	2.99341	3.01923	+	Doc+_Doc-	25	25	25	50.3	50.3	50.3	66.022	0	321.61	2767600000	72	2.65926	0	1.04996	6.44695	Q07065;Q96K21	Q07065	Cytoskeleton-associated protein 4	CKAP4	1498	up
3.36526	3.56235	3.41133	4.36307	4.39905	4.71757	+	Doc+_Doc-	11	11	8	78.2	78.2	63.4	23.482	0	226.73	7870900000	86	2.44262	0	1.04691	4.60372	P51148	P51148	Ras-related protein Rab-5C	RAB5C	1133	up
0.403297	0.491181	0.865147	1.56941	1.60726	1.70708	+	Doc+_Doc-	11	10	10	40.1	37.3	37.3	45.664	0	104.2	1076800000	29	1.89735	0.00214229	1.04138	4.20882	P63092;Q5JWF2;P38405	P63092;Q5JWF2	Guanine nucleotide-binding protein G(s) subunit alpha isoforms short;Guanine nucleotide-binding protein G(s) subunit alpha isoforms XLas	GNAS	1362	up
NaN	-2.65554	-2.88351	-1.17007	-1.74302	-2.28212	+	Doc+_Doc-	6	5	5	5.1	4.5	4.5	184.7	0	34.33	106600000	9	1.14352	0.0107137	1.03779	2.35485	Q86VI3	Q86VI3	Ras GTPase-activating-like protein IQGAP3	IQGAP3	2093	up
2.25835	2.04985	1.97969	3.0121	3.20997	3.15618	+	Doc+_Doc-	15	15	15	40.5	40.5	40.5	47.628	0	163.59	3043800000	64	3.03416	0	1.03012	5.08885	Q8NBS9	Q8NBS9	Thioredoxin domain-containing protein 5	TXNDC5	2216	up
-0.00522041	0.0815001	0.130123	1.11889	1.08106	1.07833	+	Doc+_Doc-	14	14	14	30.5	30.5	30.5	86.706	0	186.84	744070000	35	3.24828	0	1.02396	7.22669	Q6P996;Q6P474	Q6P996	Pyridoxal-dependent decarboxylase domain-containing protein 1	PDXDC1	1981	up
0.25783	-0.197738	-0.0145283	0.844854	1.01063	1.24408	+	Doc+_Doc-	8	8	8	13.4	13.4	13.4	52.264	0	56.459	714640000	26	2.33071	0	1.018	3.69036	P61619;Q9H9S3	P61619	Protein transport protein Sec61 subunit alpha isoform 1	SEC61A1	1291	up
4.29073	4.23188	4.32901	5.25852	5.20022	5.4332	+	Doc+_Doc-	10	10	10	45.8	45.8	45.8	23.742	0	160.98	13824000000	71	2.77276	0	1.01344	5.77521	P23284	P23284	Peptidyl-prolyl cis-trans isomerase B	PPIB	766	up
-1.89405	-1.29706	NaN	-0.763662	-0.728218	-0.256386	+	Doc+_Doc-	4	4	4	19.5	19.5	19.5	30.338	0	32.457	228240000	11	0.906484	0.0256559	1.0128	2.30002	Q9Y287	Q9Y287	Integral membrane protein 2B;BRI2, membrane form;BRI2 intracellular domain;BRI2C, soluble form;Bri23 peptide	ITM2B	3161	up
-1.36382	-1.67747	-1.46467	NaN	-0.441946	-0.539419	+	Doc+_Doc-	3	3	3	9.4	9.4	9.4	58.259	0	36.506	182420000	12	2.52594	0	1.0113	4.94507	P52594	P52594	Arf-GAP domain and FG repeat-containing protein 1	AGFG1	1167	up
1.65358	1.33623	1.62033	2.43902	2.50955	2.67544	+	Doc+_Doc-	20	20	20	23	23	23	128.79	0	280.42	2039500000	47	2.7107	0	1.00463	4.51151	Q9Y2A7	Q9Y2A7	Nck-associated protein 1	NCKAP1	3165	up
-1.19009	-1.26111	-1.39968	0.262966	-0.806593	-0.316677	+	Doc+_Doc-	2	2	2	9.1	9.1	9.1	32.235	0	19.775	299590000	15	1.10275	0.0143277	0.996859	2.40101	P43307	P43307	Translocon-associated protein subunit alpha	SSR1	1015	up
-1.36549	-1.25418	-1.44337	-0.260187	-0.336828	-0.478094	+	Doc+_Doc-	7	7	6	25.7	25.7	23.4	50.98	0	52.253	274300000	13	3.48051	0	0.995977	5.40751	P49840	P49840	Glycogen synthase kinase-3 alpha	GSK3A	1103	up
-0.095026	-0.125455	0.10614	0.822992	0.850061	1.19091	+	Doc+_Doc-	20	10	10	19.1	11	11	148.4	0	116.16	677970000	33	2.39819	0	0.99277	4.15547	Q96F07	Q96F07	Cytoplasmic FMR1-interacting protein 2	CYFIP2	2440	up
1.24929	1.31961	1.3371	2.18732	2.22507	2.46875	+	Doc+_Doc-	14	14	14	29.7	29.7	29.7	64.244	0	171.17	1713200000	60	2.33727	0	0.991716	5.1602	Q96AY3	Q96AY3	Peptidyl-prolyl cis-trans isomerase FKBP10	FKBP10	2391	up
-0.991522	-1.03057	-1.09416	0.2542	-0.436602	0.0287418	+	Doc+_Doc-	6	6	6	19.6	19.6	19.6	42.509	0	38.43	343600000	14	1.42678	0.00488889	0.987531	3.23173	Q16795	Q16795	NADH dehydrogenase [ubiquinone] 1 alpha subcomplex subunit 9, mitochondrial	NDUFA9	1829	up
0.557243	0.539973	0.654484	1.50156	1.54713	1.66095	+	Doc+_Doc-	5	5	5	42.6	42.6	42.6	14.582	0	73.463	1038200000	18	3.89652	0	0.985983	6.18936	O15212	O15212	Prefoldin subunit 6	PFDN6	166	up
0.948374	0.828601	0.952082	1.88024	1.71223	2.06723	+	Doc+_Doc-	17	17	17	18.1	18.1	18.1	131.98	0	173.45	1324800000	62	2.29125	0	0.976879	4.64608	O43795;Q9UBC5	O43795	Unconventional myosin-Ib	MYO1B	234	up
0.0719662	-0.0587187	0.640549	1.2312	1.16647	1.18435	+	Doc+_Doc-	8	8	8	30.4	30.4	30.4	33.428	0	76.586	815360000	19	1.35545	0.00593139	0.976076	3.09359	P53004	P53004	Biliverdin reductase A	BLVRA	1179	up
2.05057	2.02626	1.98409	2.90837	2.96684	3.11329	+	Doc+_Doc-	19	19	19	26	26	26	91.706	0	323.31	2799800000	67	2.72218	0	0.975862	5.95161	Q96QK1	Q96QK1	Vacuolar protein sorting-associated protein 35	VPS35	2507	up
-0.204796	-0.517598	-0.348982	0.378334	0.566439	0.901302	+	Doc+_Doc-	13	13	13	18.4	18.4	18.4	113.29	0	120.8	538470000	25	2.01194	0.000427673	0.972484	3.50254	Q96T76	Q96T76	MMS19 nucleotide excision repair protein homolog	MMS19	2525	up
-2.37162	-1.97732	-2.53235	-1.50741	-1.13913	NaN	+	Doc+_Doc-	4	4	4	14.2	14.2	14.2	41.949	0	30.566	125390000	9	1.37765	0.00530909	0.970495	2.7954	O60547	O60547	GDP-mannose 4,6 dehydratase	GMDS	265	up
2.87763	2.88561	2.9356	3.80921	3.87827	3.9041	+	Doc+_Doc-	10	10	4	47.7	47.7	24.9	21.768	0	106.56	5108900000	55	4.45378	0	0.964248	7.21546	P61586	P61586	Transforming protein RhoA	RHOA	1289	up
-0.753195	-0.567235	-0.414639	0.113008	0.366465	0.676788	+	Doc+_Doc-	6	5	3	21.2	18.9	11.4	42.123	0	46.597	459970000	11	1.92293	0.00214653	0.963777	3.32157	P29992;O95837;P19086;Q03113	P29992	Guanine nucleotide-binding protein subunit alpha-11	GNA11	846	up
-2.42222	-2.08166	-2.35101	-1.5973	-1.08643	-1.29572	+	Doc+_Doc-	6	6	6	15	15	15	60.541	0	51.043	141180000	11	2.08206	0.000448352	0.958479	3.41162	Q6DD88	Q6DD88	Atlastin-3	ATL3	1942	up
-0.0120869	0.445361	0.783442	1.13982	1.42293	1.52333	+	Doc+_Doc-	8	8	8	21.6	21.6	21.6	59.573	0	93.655	907690000	15	1.45308	0.00477402	0.956454	2.67521	Q9NRG9	Q9NRG9	Aladin	AAAS	2865	up
-1.58668	-2.03113	-1.76047	-0.646339	-1.0932	-0.783762	+	Doc+_Doc-	6	6	6	27.9	27.9	27.9	26.056	0	40.973	198050000	11	2.16964	0	0.951659	3.34043	Q9BVG4	Q9BVG4	Protein PBDC1	PBDC1	2634	up
-0.655981	-0.632934	-0.723555	0.186701	0.058876	0.575945	+	Doc+_Doc-	9	9	9	14.8	14.8	14.8	103.93	0	87.511	426410000	22	1.63344	0.00316641	0.944664	3.66357	Q16512	Q16512	Serine/threonine-protein kinase N1	PKN1	1807	up
2.93678	3.06817	3.09377	3.8806	3.94407	4.08721	+	Doc+_Doc-	20	20	20	41.2	41.2	41.2	68.569	0	277.19	5519400000	109	3.43952	0	0.93772	5.26536	P04843	P04843	Dolichyl-diphosphooligosaccharide--protein glycosyltransferase subunit 1	RPN1	500	up
1.03176	1.07072	1.07477	2.034	1.94954	1.99703	+	Doc+_Doc-	17	17	17	42.6	42.6	42.6	64.615	0	203.02	1404500000	48	4.38977	0	0.934442	7.29879	P31939	P31939	Bifunctional purine biosynthesis protein PURH;Phosphoribosylaminoimidazolecarboxamide formyltransferase;IMP cyclohydrolase	ATIC	883	up
-0.526417	-0.456746	-0.285126	0.360233	0.495926	0.677099	+	Doc+_Doc-	15	15	15	24.4	24.4	24.4	105.36	0	119.37	501900000	24	2.77928	0	0.933849	4.31401	Q9UHI8	Q9UHI8	A disintegrin and metalloproteinase with thrombospondin motifs 1	ADAMTS1	3053	up
NaN	-2.08021	-1.67332	-0.412689	-0.924068	-1.49596	+	Doc+_Doc-	5	5	5	27.5	27.5	27.5	29.082	0	56.857	185390000	8	1.05403	0.016626	0.932526	1.97067	O95297	O95297	Myelin protein zero-like protein 1	MPZL1	415	up
-0.258543	-0.620107	-0.169447	0.513229	0.569393	0.656586	+	Doc+_Doc-	4	4	4	22.5	22.5	22.5	24.737	0	35.018	527480000	18	1.82396	0.00328261	0.929102	3.80833	O95372	O95372	Acyl-protein thioesterase 2	LYPLA2	423	up
-0.222609	NaN	-0.889545	-0.335434	0.876547	0.563969	+	Doc+_Doc-	5	5	5	13.1	13.1	13.1	38.036	0	36.32	458050000	11	0.785539	0.0431391	0.924438	1.55858	Q9H0U3	Q9H0U3	Magnesium transporter protein 1	MAGT1	2719	up
-0.267967	-0.400317	-0.0827236	0.679773	0.610136	0.714643	+	Doc+_Doc-	13	13	13	14.3	14.3	14.3	121.74	0	126.69	564260000	34	2.25453	0	0.91852	4.66036	Q9Y3P9;B7ZAP0	Q9Y3P9	Rab GTPase-activating protein 1	RABGAP1	3215	up
1.0233	1.14845	1.199	1.96093	1.91147	2.24257	+	Doc+_Doc-	10	10	9	39.1	39.1	37	38.169	0	101.25	1461900000	42	2.35658	0	0.914738	4.24304	O75436	O75436	Vacuolar protein sorting-associated protein 26A	VPS26A	322	up
3.03296	2.91998	2.97692	3.78464	3.88026	3.97978	+	Doc+_Doc-	13	13	6	61.8	61.8	31.5	37.377	0	323.31	5225200000	61	3.24674	0	0.904939	5.48129	P62873;P16520	P62873	Guanine nucleotide-binding protein G(I)/G(S)/G(T) subunit beta-1	GNB1	1346	up
-1.02044	-0.873143	-0.363867	0.173317	0.0311394	0.231747	+	Doc+_Doc-	6	5	2	14.6	12.2	4.7	52.306	0	36.479	393040000	14	1.43579	0.00503937	0.897885	2.91867	Q15796	Q15796	Mothers against decapentaplegic homolog 2	SMAD2	1796	up
-1.61675	-0.842072	-0.827688	-0.0230675	-0.956539	0.380974	+	Doc+_Doc-	7	7	7	14.3	14.3	14.3	94.693	0	67.078	324070000	12	0.84501	0.0352727	0.89596	1.56053	Q9H269	Q9H269	Vacuolar protein sorting-associated protein 16 homolog	VPS16	2727	up
-2.66239	-3.02528	-2.64318	-1.78248	-1.76186	-2.10283	+	Doc+_Doc-	4	4	4	13.1	13.1	13.1	32.542	0	24.944	97254000	7	2.22229	0	0.894556	3.36013	Q86WA6	Q86WA6	Valacyclovir hydrolase	BPHL	2101	up
1.01289	0.863376	0.987488	1.63913	1.8482	2.05912	+	Doc+_Doc-	10	10	10	27.7	27.7	27.7	56.598	0	108.16	1276200000	30	1.99451	0.00213807	0.894232	3.89236	Q15758	Q15758	Neutral amino acid transporter B(0)	SLC1A5	1794	up
-0.525578	-0.917064	-0.610292	0.133177	0.305038	0.178267	+	Doc+_Doc-	12	12	12	18.9	18.9	18.9	91.079	0	127.09	410040000	25	2.06729	0.000669388	0.889805	3.87598	Q8IXB1	Q8IXB1	DnaJ homolog subfamily C member 10	DNAJC10	2145	up
1.87436	1.82743	1.95404	2.69202	2.67567	2.94308	+	Doc+_Doc-	22	22	12	21.5	21.5	13.2	145.18	0	195.19	2427800000	72	2.41636	0	0.884984	4.55939	Q7L576	Q7L576	Cytoplasmic FMR1-interacting protein 1	CYFIP1	2029	up
-0.810375	-0.703952	-0.602842	0.193285	-0.000919342	0.341257	+	Doc+_Doc-	10	10	10	30.5	30.5	30.5	43.944	0	80.91	401550000	26	2.47417	0	0.883597	4.09479	Q99816	Q99816	Tumor susceptibility gene 101 protein	TSG101	2569	up
1.3347	1.15817	1.09411	1.99414	2.06629	2.17223	+	Doc+_Doc-	21	21	21	38.8	38.8	38.8	76.689	0	229.65	1496700000	52	3.03831	0	0.881897	4.67607	P16435	P16435	NADPH--cytochrome P450 reductase	POR	684	up
-1.02156	-0.978087	-0.682203	0.0412827	-0.0631809	-0.0144787	+	Doc+_Doc-	7	7	7	20.5	20.5	20.5	51.871	0	133.96	352650000	25	2.00538	0.00236399	0.881824	4.18316	Q96JJ7	Q96JJ7	Protein disulfide-isomerase TMX3	TMX3	2481	up
0.17779	0.215028	0.33168	1.06437	1.16302	1.1401	+	Doc+_Doc-	6	6	6	34.5	34.5	34.5	25.003	0	61.444	772800000	17	3.60219	0	0.880997	5.6798	Q15005	Q15005	Signal peptidase complex subunit 2	SPCS2	1723	up
0.363552	0.21091	0.155802	1.13518	1.0637	1.17385	+	Doc+_Doc-	8	8	8	49.8	49.8	49.8	24.997	0	101.09	795930000	29	2.96928	0	0.880825	5.1809	Q13637	Q13637	Ras-related protein Rab-32	RAB32	1641	up
-0.0803051	-0.487248	-0.251188	0.595343	0.439661	0.776678	+	Doc+_Doc-	13	13	13	19.2	19.2	19.2	111.76	0	97.396	540400000	24	2.2919	0	0.876808	3.46598	Q8N766	Q8N766	ER membrane protein complex subunit 1	EMC1	2198	up
0.437172	0.327098	0.619694	1.31544	1.2949	1.37624	+	Doc+_Doc-	7	7	7	14	14	14	64.734	0	115.23	893230000	32	2.21251	0.000440605	0.867539	4.59623	P35610	P35610	Sterol O-acyltransferase 1	SOAT1	924	up
0.0131416	-0.231128	-0.400414	0.503765	0.554956	0.915731	+	Doc+_Doc-	6	6	6	41.7	41.7	41.7	21.452	0	61.804	562030000	24	2.08552	0.000676289	0.864284	3.12383	P00374	P00374	Dihydrofolate reductase	DHFR	465	up
-1.96873	-1.71065	NaN	-1.20036	-0.952183	-0.791996	+	Doc+_Doc-	3	3	3	31.1	31.1	31.1	17.745	0	59.157	180830000	8	1.61233	0.00332743	0.858174	3.11617	Q6IAA8	Q6IAA8	Ragulator complex protein LAMTOR1	LAMTOR1	1949	up
1.4873	1.05895	0.871685	1.91991	2.0119	2.03337	+	Doc+_Doc-	8	8	8	54.9	54.9	54.9	20.954	0	124.39	1418200000	36	1.40932	0.00592386	0.849083	2.97412	Q16527	Q16527	Cysteine and glycine-rich protein 2	CSRP2	1809	up
-0.535583	-0.23121	-0.422058	0.409929	0.591459	0.347801	+	Doc+_Doc-	7	7	7	37.4	37.4	37.4	36.079	0	60.043	489460000	18	2.67905	0	0.846014	3.93456	Q9UET6	Q9UET6	Putative tRNA (cytidine(32)/guanosine(34)-2-O)-methyltransferase	FTSJ1	3030	up
NaN	-1.38861	-1.2469	-0.201387	-0.437214	-0.780247	+	Doc+_Doc-	4	4	4	16.6	16.6	16.6	36.167	0	31.077	250130000	7	1.59196	0.00326012	0.844803	2.99172	Q8N9F7	Q8N9F7	Glycerophosphodiester phosphodiesterase domain-containing protein 1	GDPD1	2203	up
1.5936	1.38889	1.58917	2.27955	2.36542	2.44563	+	Doc+_Doc-	25	25	23	27.3	27.3	25.8	133.28	0	210.69	1835400000	75	3.05338	0	0.839647	4.59302	P23458	P23458	Tyrosine-protein kinase JAK1	JAK1	772	up
0.680098	0.299584	0.59355	1.3785	1.39534	1.31625	+	Doc+_Doc-	10	10	10	44.7	44.7	44.7	33.232	0	119.06	921180000	37	1.81852	0.00309744	0.838951	3.85475	P54920;Q9H115	P54920	Alpha-soluble NSF attachment protein	NAPA	1208	up
-1.73745	-1.48438	-1.95761	-1.13943	-0.829294	-0.702122	+	Doc+_Doc-	5	5	5	29	29	29	19.398	0	33.221	193100000	11	1.94114	0.00314925	0.836193	2.89769	Q9GZZ1	Q9GZZ1	N-alpha-acetyltransferase 50	NAA50	2706	up
1.04377	1.27678	1.09836	1.82267	1.95444	2.14567	+	Doc+_Doc-	9	9	9	37.8	37.8	37.8	34.324	0	87.317	1401900000	27	2.56516	0	0.834622	3.84213	Q53GQ0	Q53GQ0	Very-long-chain 3-oxoacyl-CoA reductase	HSD17B12	1868	up
-1.00515	-0.763988	-0.457458	0.082283	-0.0721779	0.266836	+	Doc+_Doc-	3	3	3	11.9	11.9	11.9	21.08	0	50.128	381490000	15	1.78171	0.00304538	0.834513	2.91452	Q9UNL2	Q9UNL2	Translocon-associated protein subunit gamma	SSR3	3129	up
1.97966	1.4445	1.74567	2.42357	2.53527	2.71216	+	Doc+_Doc-	11	11	3	43.2	43.2	13.9	40.648	0	195.19	2163500000	50	1.77412	0.0030301	0.833723	3.01844	P10321;Q31612;P30499	P10321	HLA class I histocompatibility antigen, Cw-7 alpha chain	HLA-C	592	up
0.537748	-0.11757	0.91424	1.32842	1.46172	1.03908	+	Doc+_Doc-	3	3	3	5.8	5.8	5.8	53.944	0	49.568	883270000	14	1.0246	0.0204431	0.831601	1.95096	P53985	P53985	Monocarboxylate transporter 1	SLC16A1	1193	up
-0.484892	-0.77665	-0.920218	0.161581	0.00572586	0.126249	+	Doc+_Doc-	8	8	8	39.1	39.1	39.1	28.97	0	58.744	383690000	20	1.83871	0.0031623	0.825105	3.48904	O95721	O95721	Synaptosomal-associated protein 29	SNAP29	441	up
0.0176544	0.15989	0.0295944	0.666086	0.907932	1.10731	+	Doc+_Doc-	4	4	4	68.2	68.2	68.2	9.1175	0	37.428	665610000	15	1.83181	0.00313495	0.82473	3.50269	P61960	P61960	Ubiquitin-fold modifier 1	UFM1	1298	up
-1.38461	-1.6586	-1.50548	-0.831366	-0.537867	-0.711779	+	Doc+_Doc-	6	6	6	16.3	16.3	16.3	46.323	0	46.577	221970000	15	2.66637	0	0.82256	3.80141	Q8IWB7	Q8IWB7	WD repeat and FYVE domain-containing protein 1	WDFY1	2135	up
0.465908	0.55449	0.744902	1.34464	1.39595	1.48246	+	Doc+_Doc-	6	6	5	32.8	32.8	25.5	27.277	0	108	948890000	24	2.47478	0	0.819249	4.27566	Q9BVK6	Q9BVK6	Transmembrane emp24 domain-containing protein 9	TMED9	2636	up
0.287519	-0.000548363	0.442812	1.02918	0.998041	1.15786	+	Doc+_Doc-	14	14	14	23.9	23.9	23.9	83.308	0	114.55	747490000	37	1.82308	0.00310274	0.818433	3.42739	P48449	P48449	Lanosterol synthase	LSS	1058	up
2.04933	2.16225	2.06784	2.82689	2.86691	3.03396	+	Doc+_Doc-	15	15	15	29.5	29.5	29.5	47.578	0	225.6	2685400000	62	2.8993	0	0.816113	4.73348	P09543	P09543	2,3-cyclic-nucleotide 3-phosphodiesterase	CNP	580	up
-3.55284	-3.76107	-3.29652	-2.64472	-2.79964	NaN	+	Doc+_Doc-	3	3	3	14.1	14.1	14.1	32.868	0	19.91	48418000	6	1.83799	0.0031513	0.814633	3.19372	P29372	P29372	DNA-3-methyladenine glycosylase	MPG	840	up
-2.69156	-2.59882	-2.5804	-1.44088	-1.67045	-2.34076	+	Doc+_Doc-	2	2	2	4.4	4.4	4.4	68.641	0.00066138	12.644	105880000	4	1.02728	0.0204031	0.80623	2.16646	Q9Y289	Q9Y289	Sodium-dependent multivitamin transporter	SLC5A6	3162	up
-0.884148	-0.787778	-0.607698	-0.149759	0.0382652	0.247229	+	Doc+_Doc-	6	6	6	13.9	13.9	13.9	54.812	0	46.005	370010000	23	2.20175	0.000436831	0.80512	3.34925	O75844	O75844	CAAX prenyl protease 1 homolog	ZMPSTE24	353	up
-0.791616	-0.862176	-0.830524	-0.445583	0.135307	0.240774	+	Doc+_Doc-	3	3	3	9.1	9.1	9.1	42.153	0	36.322	356000000	10	1.20489	0.0121737	0.804938	2.56053	Q16186	Q16186	Proteasomal ubiquitin receptor ADRM1	ADRM1	1804	up
-1.20456	-1.14335	-0.878849	-0.186895	-0.463266	-0.172192	+	Doc+_Doc-	4	4	4	10	10	10	69.991	0	53.753	297490000	13	2.35913	0	0.801466	3.3723	Q14738;Q13362	Q14738;Q13362	Serine/threonine-protein phosphatase 2A 56 kDa regulatory subunit delta isoform;Serine/threonine-protein phosphatase 2A 56 kDa regulatory subunit gamma isoform	PPP2R5D;PPP2R5C	1710	up
-3.46234	-3.29491	NaN	-2.7928	NaN	-2.3653	+	Doc+_Doc-	3	3	3	12.9	12.9	12.9	26.697	0	16.87	49866000	8	0.883492	0.0340313	0.799575	2.42617	Q96C19;Q9BUP0	Q96C19	EF-hand domain-containing protein D2	EFHD2	2400	up
0.489349	0.551913	0.671494	1.34285	1.23326	1.53347	+	Doc+_Doc-	12	12	10	60.3	60.3	49.8	30.375	0	176.53	926960000	32	2.50758	0	0.798942	3.94147	P16152	P16152	Carbonyl reductase [NADPH] 1	CBR1	680	up
0.227722	0.0982103	0.0541039	0.911388	0.77969	1.0777	+	Doc+_Doc-	10	10	10	33.7	33.7	33.7	52.878	0	72.8	680480000	24	2.52148	0	0.796247	3.96656	Q96KP4	Q96KP4	Cytosolic non-specific dipeptidase	CNDP2	2489	up
-0.182014	-0.627624	-0.324568	0.474792	0.563477	0.211367	+	Doc+_Doc-	8	8	8	42	42	42	34.165	0	66.625	484720000	15	1.98782	0.00293433	0.794614	2.9578	P50225;P0DMN0;P0DMM9;P50226	P50225	Sulfotransferase 1A1	SULT1A1	1112	up
3.81703	3.46517	3.53789	4.34017	4.39704	4.45394	+	Doc+_Doc-	12	8	8	57.6	43.7	43.7	27.745	0	323.31	7641400000	57	1.9153	0.00321847	0.790349	3.72529	P63104	P63104	14-3-3 protein zeta/delta	YWHAZ	1364	up
1.35802	1.36986	1.47296	2.14335	2.17597	2.25229	+	Doc+_Doc-	12	12	12	42.9	42.9	42.9	41.9	0	156.57	1643700000	39	4.02888	0	0.790257	5.3135	Q15738	Q15738	Sterol-4-alpha-carboxylate 3-dehydrogenase, decarboxylating	NSDHL	1792	up
2.98326	3.07057	3.26975	3.84535	3.73409	4.07966	+	Doc+_Doc-	7	7	7	56.9	56.9	56.9	14.839	0	104.1	5343200000	35	2.33367	0.000218182	0.778504	3.34823	P62244	P62244	40S ribosomal protein S15a	RPS15A	1313	up
3.78764	3.85102	3.93737	4.58478	4.62028	4.69683	+	Doc+_Doc-	52	52	51	37.3	37.3	36.8	189.25	0	323.31	8931800000	193	3.66284	0	0.775286	5.0163	P46940	P46940	Ras GTPase-activating-like protein IQGAP1	IQGAP1	1045	up
-0.599609	-0.684958	-0.610453	0.0800056	0.0947285	0.248909	+	Doc+_Doc-	8	8	8	30	30	30	40.572	0	73.169	396680000	20	2.93859	0	0.772888	4.82123	Q9UNZ2	Q9UNZ2	NSFL1 cofactor p47	NSFL1C	3133	up
-0.912783	-1.16379	-1.0217	-0.37631	-0.304842	-0.0984669	+	Doc+_Doc-	5	5	5	30.9	30.9	30.9	21.466	0	125.26	311800000	17	2.62786	0	0.772885	3.67091	P84157	P84157	Matrix-remodeling-associated protein 7	MXRA7	1417	up
-0.14291	-0.119527	-0.0226479	0.582436	0.584368	0.858778	+	Doc+_Doc-	6	6	6	20.2	20.2	20.2	56.928	0	89.58	574640000	21	2.15811	0.00176447	0.770222	3.87239	Q9NP61	Q9NP61	ADP-ribosylation factor GTPase-activating protein 3	ARFGAP3	2827	up
5.30896	5.2583	5.14114	5.89896	5.99733	6.12125	+	Doc+_Doc-	9	9	9	70	70	70	15.054	0	116.75	23532000000	95	3.0322	0	0.769713	4.2461	P07737;CON__P02584	P07737	Profilin-1	PFN1	540	up
0.371765	0.301652	0.483347	0.844934	1.25521	1.36384	+	Doc+_Doc-	10	10	10	33	33	33	46.971	0	104.26	805030000	27	1.529	0.00507937	0.769071	2.88445	Q9BS26	Q9BS26	Endoplasmic reticulum resident protein 44	ERP44	2600	up
2.25044	2.00941	2.2668	2.79327	3.03709	3.00129	+	Doc+_Doc-	9	9	9	29.3	29.3	29.3	27.991	0	71.929	2776500000	40	2.60349	0	0.768335	3.61233	P51572	P51572	B-cell receptor-associated protein 31	BCAP31	1142	up
0.200886	0.0675325	0.323742	0.87731	0.900051	1.11761	+	Doc+_Doc-	15	12	12	28.2	23	23	85.496	0	191.7	702940000	23	2.70498	0	0.767603	3.71744	P35222	P35222	Catenin beta-1	CTNNB1	909	up
-0.289389	-0.277127	-0.587011	-0.165709	0.521477	0.792786	+	Doc+_Doc-	9	9	9	37.2	37.2	37.2	38.868	0	74.631	478790000	19	0.991742	0.0245607	0.76736	1.90553	O14745	O14745	Na(+)/H(+) exchange regulatory cofactor NHE-RF1	SLC9A3R1	122	up
-0.708021	-0.714822	-0.798962	-0.0938816	0.0229721	0.149267	+	Doc+_Doc-	6	6	6	17	17	17	55.882	0	61.11	366580000	17	2.47539	0	0.766721	4.35497	Q9UI12	Q9UI12	V-type proton ATPase subunit H	ATP6V1H	3063	up
1.82943	1.7957	1.90084	2.67088	2.46656	2.68014	+	Doc+_Doc-	9	9	9	40.1	40.1	40.1	41.35	0	139.08	2255600000	46	2.52397	0	0.763867	4.33324	Q9BWD1	Q9BWD1	Acetyl-CoA acetyltransferase, cytosolic	ACAT2	2643	up
-1.43194	-1.44949	-1.4937	-0.935061	-0.789507	-0.368187	+	Doc+_Doc-	5	5	5	19.6	19.6	19.6	29.634	0	41.024	222980000	16	1.34665	0.00896632	0.76079	2.80771	O60762	O60762	Dolichol-phosphate mannosyltransferase subunit 1	DPM1	278	up
5.06355	4.96695	5.15941	5.83377	5.80645	5.82951	+	Doc+_Doc-	8	8	3	55.8	55.8	21.2	17.965	0	129.17	20588000000	89	2.34435	0.000887984	0.759937	4.86501	P62979;P0CG47;P0CG48	P62979;P0CG47;P0CG48	Ubiquitin-40S ribosomal protein S27a;Ubiquitin;40S ribosomal protein S27a;Polyubiquitin-B;Ubiquitin;Polyubiquitin-C;Ubiquitin	RPS27A;UBB;UBC	1358	up
1.01718	1.3874	1.50241	1.95991	2.07345	2.14292	+	Doc+_Doc-	12	12	12	26.2	26.2	26.2	64.369	0	104.52	1505100000	43	1.60842	0.00426778	0.756432	2.95707	P08243	P08243	Asparagine synthetase [glutamine-hydrolyzing]	ASNS	558	up
0.00694466	-0.350602	-0.207453	0.411316	0.715164	0.590805	+	Doc+_Doc-	12	12	12	20	20	20	107.89	0	108.71	538660000	26	2.25401	0.000433121	0.756132	3.20014	O60763	O60763	General vesicular transport factor p115	USO1	279	up
2.92563	2.558	2.78895	3.45988	3.50393	3.57572	+	Doc+_Doc-	3	3	1	38.1	38.1	13.1	9.461	0	35.858	4123600000	25	1.87847	0.00305051	0.755651	3.55655	P42677	P42677	40S ribosomal protein S27	RPS27	1000	up
2.64636	2.41974	2.53379	3.09811	3.41159	3.33106	+	Doc+_Doc-	6	3	3	42	20.4	20.4	20.697	0	46.109	3540300000	20	2.37654	0.000217195	0.746951	3.482	P84077;P61204	P84077;P61204	ADP-ribosylation factor 1;ADP-ribosylation factor 3	ARF1;ARF3	1277	up
0.596664	0.379514	0.625149	1.16834	1.31223	1.35886	+	Doc+_Doc-	9	7	4	45.9	37.2	22.7	23.668	0	88.887	879170000	26	2.67915	0	0.746035	3.79743	P61006;Q96E17	P61006	Ras-related protein Rab-8A	RAB8A	1261	up
-1.49452	NaN	-1.84298	-1.04875	-1.08944	-0.639616	+	Doc+_Doc-	3	3	3	12.9	12.9	12.9	48.509	0	16.63	185360000	7	1.1706	0.0150785	0.742816	2.27992	Q9BY67	Q9BY67	Cell adhesion molecule 1	CADM1	2666	up
1.01852	0.603948	0.93314	1.57727	1.52376	1.68291	+	Doc+_Doc-	13	13	13	20.9	20.9	20.9	88.414	0	128	1093300000	49	1.74456	0.00343379	0.742779	3.16402	P05556	P05556	Integrin beta-1	ITGB1	517	up
-1.0133	-1.20697	-0.836399	-0.168365	-0.160326	-0.504583	+	Doc+_Doc-	4	4	4	18.6	18.6	18.6	24.935	0	34.336	302010000	12	2.04434	0.00313173	0.741131	2.89565	P51809	P51809	Vesicle-associated membrane protein 7	VAMP7	1153	up
-1.16658	-1.02028	-0.647701	-0.237638	-0.237095	-0.139683	+	Doc+_Doc-	7	7	7	15.2	15.2	15.2	78.947	0	63.936	314390000	8	1.44266	0.00656119	0.740046	2.87	O14641;P54792;O14640;Q92997	O14641	Segment polarity protein dishevelled homolog DVL-2	DVL2	108	up
-0.41712	-0.886415	-0.767899	0.0965347	0.0103722	0.0295563	+	Doc+_Doc-	7	7	7	21.8	21.8	21.8	63.145	0	62.118	374990000	15	1.50606	0.00539175	0.735965	3.02498	Q14699	Q14699	Raftlin	RFTN1	1709	up
1.50963	1.61901	1.68014	2.27329	2.29939	2.44395	+	Doc+_Doc-	12	12	12	21.1	21.1	21.1	91.916	0	95.337	1829300000	27	3.25933	0	0.735951	4.25817	Q13724	Q13724	Mannosyl-oligosaccharide glucosidase	MOGS	1644	up
-0.5606	-0.774835	-0.59779	-0.356308	0.175291	0.452906	+	Doc+_Doc-	5	5	5	19.1	19.1	19.1	40.329	0	49.517	389790000	15	1.09126	0.0184416	0.735038	2.12174	P61421	P61421	V-type proton ATPase subunit d 1	ATP6V0D1	1286	up
0.21413	0.332274	0.224131	0.976212	0.935141	1.05532	+	Doc+_Doc-	15	15	15	12.9	12.9	12.9	174.76	0	104.93	718380000	33	3.82642	0	0.732047	4.82509	P35573	P35573	Glycogen debranching enzyme;4-alpha-glucanotransferase;Amylo-alpha-1,6-glucosidase	AGL	920	up
0.549229	0.689237	0.54953	1.15147	1.31005	1.52154	+	Doc+_Doc-	14	14	14	17.3	17.3	17.3	128.98	0	124.67	908630000	39	1.96612	0.00321277	0.731689	3.37355	Q8WUM0	Q8WUM0	Nuclear pore complex protein Nup133	NUP133	2291	up
-2.80069	-2.55834	-2.48761	-1.76325	NaN	-2.00574	+	Doc+_Doc-	5	5	5	3.1	3.1	3.1	219.6	0	37.091	90366000	8	1.45828	0.00636409	0.731049	2.87922	Q6YHU6	Q6YHU6	Thyroid adenoma-associated protein	THADA	2006	up
-1.85247	-1.45094	-2.05088	-0.755241	-1.15725	-1.25126	+	Doc+_Doc-	5	5	5	14.1	14.1	14.1	50.435	0	34.454	177700000	10	1.44257	0.00674146	0.730183	2.1929	Q07960	Q07960	Rho GTPase-activating protein 1	ARHGAP1	1506	up
2.09772	1.94255	2.29147	2.82133	2.78449	2.91542	+	Doc+_Doc-	13	13	7	45.6	45.6	28.5	40.45	0	165.08	2677000000	47	1.97896	0.0032242	0.729835	3.50551	P04899;P11488;P19087;A8MTJ3;P09471	P04899	Guanine nucleotide-binding protein G(i) subunit alpha-2	GNAI2	502	up
-0.331785	NaN	-0.405323	0.2071	0.416	0.456905	+	Doc+_Doc-	3	3	3	22.5	22.5	22.5	19.258	0	29.316	435360000	8	2.31374	0.000425887	0.728556	3.92433	O60831	O60831	PRA1 family protein 2	PRAF2	285	up
-0.719437	-1.14288	-0.825411	-0.300213	-0.364925	0.154621	+	Doc+_Doc-	9	9	8	15.5	15.5	14.2	86.661	0	81.227	323540000	12	1.56396	0.00507266	0.725736	2.3629	Q96D71	Q96D71	RalBP1-associated Eps domain-containing protein 1	REPS1	2416	up
0.308132	-0.0112333	0.035532	0.800631	0.960947	0.74748	+	Doc+_Doc-	12	12	11	20.3	20.3	19.2	86.942	0	120.2	650620000	24	2.22662	0.00107099	0.725542	3.32118	P05067	P05067	Amyloid beta A4 protein;N-APP;Soluble APP-alpha;Soluble APP-beta;C99;Beta-amyloid protein 42;Beta-amyloid protein 40;C83;P3(42);P3(40);C80;Gamma-secretase C-terminal fragment 59;Gamma-secretase C-terminal fragment 57;Gamma-secretase C-terminal fragment 50;C31	APP	507	up
-0.775269	-1.2815	-0.954512	-0.165995	-0.420294	-0.251274	+	Doc+_Doc-	9	9	6	14.2	14.2	9.7	83.735	0	55.014	300340000	14	1.63975	0.00368671	0.724574	2.72426	P51812;Q15349;Q9UK32;O60307;Q9Y2H9;Q6P0Q8	P51812	Ribosomal protein S6 kinase alpha-3	RPS6KA3	1154	up
1.58231	1.50841	1.67363	2.38291	2.099	2.45579	+	Doc+_Doc-	8	8	8	46.6	46.6	46.6	32.444	0	201.61	1805300000	40	1.94183	0.00315679	0.724448	3.31004	O00560	O00560	Syntenin-1	SDCBP	91	up
3.16639	3.02942	3.13109	3.76288	3.77146	3.96336	+	Doc+_Doc-	17	17	16	40.2	40.2	38.5	60.13	0	267.9	5160700000	87	2.79743	0	0.723598	4.0822	O75131;Q96FN4;Q8IYJ1;Q96A23;O95741;Q9UBL6	O75131	Copine-3	CPNE3	297	up
5.38773	5.15562	5.26229	5.91298	5.99128	6.06596	+	Doc+_Doc-	19	19	16	74.1	74.1	64.3	29.174	0	323.31	23529000000	159	2.79064	0	0.72153	4.00151	P62258	P62258	14-3-3 protein epsilon	YWHAE	1315	up
1.44346	1.4066	1.34204	2.08446	2.00559	2.26628	+	Doc+_Doc-	12	12	12	71.2	71.2	71.2	23.897	0	226.97	1574200000	38	2.25421	0.001768	0.721409	3.94897	P61106	P61106	Ras-related protein Rab-14	RAB14	1272	up
1.31801	1.376	1.35973	2.02981	1.93751	2.23058	+	Doc+_Doc-	10	10	10	39	39	39	35.716	0	195.63	1519200000	52	1.92637	0.00299504	0.714715	3.79724	P04818	P04818	Thymidylate synthase	TYMS	499	up
-2.75569	-2.41965	NaN	-2.38804	-1.72631	-1.51402	+	Doc+_Doc-	2	2	2	9.9	9.9	9.9	48.337	0	18.76	94965000	6	0.967309	0.0267837	0.711551	1.72601	P14635	P14635	G2/mitotic-specific cyclin-B1	CCNB1	663	up
-0.727419	-0.743361	-0.233168	-0.137236	0.640236	-0.0735092	+	Doc+_Doc-	7	7	7	24.9	24.9	24.9	43.215	0	55.918	414240000	10	1.06435	0.0211595	0.711146	1.77672	P53582	P53582	Methionine aminopeptidase 1	METAP1	1186	up
-1.24065	NaN	-1.31262	-0.580292	-0.553894	NaN	+	Doc+_Doc-	5	5	5	12.2	12.2	12.2	75.019	0	34.99	205930000	4	1.76754	0.00528999	0.709541	5.12927	Q9BW27	Q9BW27	Nuclear pore complex protein Nup85	NUP85	2639	up
-0.409676	-0.37474	-0.237661	0.0797386	0.435457	0.584503	+	Doc+_Doc-	9	9	9	20	20	20	56.72	0	86.463	469800000	29	1.5096	0.00580892	0.707259	2.73427	Q8N6H7	Q8N6H7	ADP-ribosylation factor GTPase-activating protein 2	ARFGAP2	2196	up
-0.0790005	-0.171021	0.182442	0.77129	0.631027	0.650459	+	Doc+_Doc-	7	7	7	24.7	24.7	24.7	39.933	0	157.23	587230000	27	1.92107	0.00303518	0.706786	3.29346	Q96A49	Q96A49	Synapse-associated protein 1	SYAP1	2384	up
1.07097	1.10429	1.23535	1.80165	1.72699	2.00206	+	Doc+_Doc-	6	6	5	28.2	28.2	23.6	21.671	0	63.03	1303800000	18	2.43102	0.000457399	0.706695	3.60122	O00264	O00264	Membrane-associated progesterone receptor component 1	PGRMC1	64	up
0.0889587	0.047967	-0.0723228	0.623396	0.684969	0.875177	+	Doc+_Doc-	5	5	5	37.4	37.4	37.4	20.361	0	43.204	601410000	20	2.5671	0	0.706313	3.71909	Q9NQE9	Q9NQE9	Histidine triad nucleotide-binding protein 3	HINT3	2847	up
2.56306	2.31535	2.34019	3.12264	3.26004	2.9517	+	Doc+_Doc-	8	8	8	43.2	43.2	43.2	20.762	0	106.6	3171500000	44	2.37076	0.000441558	0.705262	3.22065	Q02543	Q02543	60S ribosomal protein L18a	RPL18A	1459	up
0.233305	-0.0161943	0.114756	0.789852	0.640329	1.00827	+	Doc+_Doc-	8	8	5	23.6	23.6	14.7	64.009	0	79.708	647030000	27	2.09785	0.00314339	0.702195	3.06821	Q13131	Q13131	5-AMP-activated protein kinase catalytic subunit alpha-1	PRKAA1	1573	up
1.31705	1.09631	1.25473	1.82415	1.97386	1.97107	+	Doc+_Doc-	18	18	14	24.5	24.5	19.1	107.54	0	162.46	1380300000	46	2.84254	0	0.700332	3.8431	O95782	O95782	AP-2 complex subunit alpha-1	AP2A1	443	up
0.797791	0.752471	0.675388	1.24669	1.41518	1.6599	+	Doc+_Doc-	10	10	10	43.8	43.8	43.8	31.444	0	84.935	987730000	31	1.67718	0.00369705	0.698709	3.10309	O75663	O75663	TIP41-like protein	TIPRL	342	up
2.65461	2.53799	2.54007	3.1043	3.28595	3.43473	+	Doc+_Doc-	8	8	5	51.7	51.7	30	20.529	0	100.16	3539200000	42	2.00751	0.00319577	0.697435	3.43529	P84085	P84085	ADP-ribosylation factor 5	ARF5	1413	up
-2.48202	-1.66542	-1.99171	-1.21328	-1.41961	-1.42223	+	Doc+_Doc-	5	5	5	17.5	17.5	17.5	46.655	0	39.31	144090000	7	1.04792	0.0219789	0.694676	2.00081	P34949	P34949	Mannose-6-phosphate isomerase	MPI	904	up
1.21981	1.36657	1.19788	1.84742	1.88531	2.1328	+	Doc+_Doc-	11	11	11	42.6	42.6	42.6	33.777	0	117.2	1410800000	41	2.27332	0.00153226	0.693755	3.40108	P46109	P46109	Crk-like protein	CRKL	1030	up
3.8576	3.86928	3.95882	4.46566	4.5667	4.73452	+	Doc+_Doc-	8	8	8	64.3	64.3	64.3	14.865	0	78.686	8955600000	68	2.22557	0.00235937	0.693728	3.75649	P62829	P62829	60S ribosomal protein L23	RPL23	1341	up
1.22119	1.21631	1.28749	1.94383	1.95821	1.89274	+	Doc+_Doc-	6	6	6	45.6	45.6	45.6	20.567	0	130.34	1392400000	31	4.58138	0	0.689929	5.29251	P21291	P21291	Cysteine and glycine-rich protein 1	CSRP1	738	up
1.21033	1.08026	1.29854	1.90739	1.88309	1.85841	+	Doc+_Doc-	9	6	6	35.6	25.5	25.5	28.302	0	115.07	1347100000	40	2.19955	0.00310294	0.686589	4.16232	P61981	P61981	14-3-3 protein gamma;14-3-3 protein gamma, N-terminally processed	YWHAG	1303	up
-0.848085	-0.670648	-0.652931	-0.328636	0.0564919	0.158989	+	Doc+_Doc-	3	3	3	10.1	10.1	10.1	50.386	0	27.542	356200000	12	1.52994	0.00550895	0.68617	2.62915	Q8IYB5	Q8IYB5	Stromal membrane-associated protein 1	SMAP1	2152	up
0.0470905	0.125205	0.186563	0.791899	0.727032	0.887447	+	Doc+_Doc-	11	11	11	20.4	20.4	20.4	87.156	0	143.17	635710000	21	3.37519	0	0.682506	4.2224	Q9Y263	Q9Y263	Phospholipase A-2-activating protein	PLAA	3154	up
NaN	-1.24192	-0.848909	-0.322208	-0.495012	-0.273577	+	Doc+_Doc-	8	7	7	15.7	14.4	14.4	61.116	0	48.152	269070000	10	0.828343	0.0460245	0.681813	2.21604	Q9NZW5	Q9NZW5	MAGUK p55 subfamily member 6	MPP6	2966	up
-2.72558	NaN	-2.58213	-2.1216	-2.04048	-1.7542	+	Doc+_Doc-	4	4	4	8.1	8.1	8.1	91.866	0	30.125	90142000	10	1.8389	0.00316149	0.681763	2.93203	P30260	P30260	Cell division cycle protein 27 homolog	CDC27	863	up
0.399221	0.0558786	0.104721	NaN	0.814226	0.919338	+	Doc+_Doc-	3	3	1	23.6	23.6	7.5	12.441	0	21.914	561150000	16	1.87179	0.00306477	0.680175	3.09982	P83881	P83881	60S ribosomal protein L36a	RPL36A	1411	up
0.784893	0.804875	0.782454	1.44673	1.41118	1.55172	+	Doc+_Doc-	19	19	19	21.7	21.7	21.7	134.32	0	137.24	1010100000	41	2.50727	0.00128745	0.679137	4.75644	Q15155;P69849;Q5JPE7	Q15155;P69849;Q5JPE7	Nodal modulator 1;Nodal modulator 3;Nodal modulator 2	NOMO1;NOMO3;NOMO2	1747	up
0.424274	0.551238	0.438107	0.95063	1.12376	1.37054	+	Doc+_Doc-	6	6	6	11.4	11.4	11.4	67.887	0	47.556	809140000	21	1.656	0.00446612	0.677103	2.96583	Q9HD45	Q9HD45	Transmembrane 9 superfamily member 3	TM9SF3	2824	up
-0.705557	-0.70378	-0.373905	-0.0299664	0.156158	0.116137	+	Doc+_Doc-	9	9	9	22.1	22.1	22.1	66.452	0	71.608	386850000	19	1.90989	0.00312399	0.67519	3.01534	Q15833	Q15833	Syntaxin-binding protein 2	STXBP2	1799	up
-1.7142	-1.7685	-1.75496	-1.09814	-1.24284	-0.8727	+	Doc+_Doc-	3	3	3	13.2	13.2	13.2	39.232	0	33.955	173840000	15	1.64826	0.00489544	0.674658	3.22923	Q53GG5	Q53GG5	PDZ and LIM domain protein 3	PDLIM3	1867	up
-0.941603	-0.892047	-0.721552	-0.207495	-0.116869	-0.209019	+	Doc+_Doc-	6	6	6	18.4	18.4	18.4	47.145	0	68.427	323510000	19	2.44813	0.000434043	0.67394	3.88936	Q9H8Y8	Q9H8Y8	Golgi reassembly-stacking protein 2	GORASP2	2781	up
-1.5335	-1.29828	-1.19361	-0.676056	-0.831501	-0.497503	+	Doc+_Doc-	3	3	3	15.1	15.1	15.1	46.939	0	45.518	230040000	11	2.07191	0.00327076	0.673443	2.81394	Q9Y2T2	Q9Y2T2	AP-3 complex subunit mu-1	AP3M1	3183	up
-1.38694	-1.00055	-0.852163	-0.529375	-0.586365	-0.108696	+	Doc+_Doc-	3	3	3	32.6	32.6	32.6	15.55	0	25.426	276380000	14	1.4236	0.00874592	0.67174	2.10376	P08708	P08708	40S ribosomal protein S17	RPS17	564	up
-0.819908	-0.655143	-0.457458	-0.0115929	-0.0231056	0.116121	+	Doc+_Doc-	10	10	10	17.4	17.4	17.4	83.381	0	91.041	372350000	24	1.88668	0.00306962	0.671311	3.13877	Q9UPT5	Q9UPT5	Exocyst complex component 7	EXOC7	3137	up
-0.133251	-0.00309658	0.0413456	0.46312	0.636015	0.816944	+	Doc+_Doc-	7	7	3	48.7	48.7	16.4	21.229	0	90.467	568720000	20	1.99323	0.00311876	0.67036	3.12087	P01111	P01111	GTPase NRas	NRAS	477	up
-0.747658	-0.451854	-0.145987	0.186453	-0.0114918	0.489464	+	Doc+_Doc-	10	10	10	14.5	14.5	14.5	127.46	0	95.971	431180000	18	1.36324	0.0102766	0.669974	2.05077	Q9HAU0	Q9HAU0	Pleckstrin homology domain-containing family A member 5	PLEKHA5	2798	up
1.70138	1.7197	1.78467	2.35545	2.28136	2.56975	+	Doc+_Doc-	6	6	6	30.8	30.8	30.8	38.287	0	195.53	1931300000	44	1.94626	0.00310897	0.666933	3.50862	O14828	O14828	Secretory carrier-associated membrane protein 3	SCAMP3	130	up
0.392706	0.143693	0.385967	0.998514	0.989096	0.931761	+	Doc+_Doc-	14	12	12	19.7	17.3	17.3	97.717	0	121.49	719800000	32	1.95983	0.00311897	0.665668	3.60759	Q9Y678	Q9Y678	Coatomer subunit gamma-1	COPG1	3278	up
-0.634104	-0.456359	-0.404312	0.0232677	0.154322	0.310368	+	Doc+_Doc-	4	4	4	27	27	27	17.138	0	34.443	409350000	16	2.39592	0.000425	0.660911	3.17312	P61088;Q5JXB2	P61088;Q5JXB2	Ubiquitin-conjugating enzyme E2 N;Putative ubiquitin-conjugating enzyme E2 N-like	UBE2N;UBE2NL	1271	up
-2.04464	-1.67318	-2.22569	-1.27817	-1.59177	-1.09231	+	Doc+_Doc-	6	6	6	20.7	20.7	20.7	45.834	0	44.541	160270000	9	1.40229	0.00967431	0.660424	2.07436	P82933	P82933	28S ribosomal protein S9, mitochondrial	MRPS9	1408	up
-1.67929	-2.29099	-1.6889	-1.27001	-1.27142	-1.13721	+	Doc+_Doc-	2	2	2	10.6	10.6	10.6	24.389	0	24.134	156990000	11	1.11805	0.0194614	0.660181	2.14935	P20338	P20338	Ras-related protein Rab-4A	RAB4A	726	up
-1.37444	-1.55773	-1.44149	-0.888145	-0.859783	-0.658113	+	Doc+_Doc-	7	7	7	11.1	11.1	11.1	95.925	0	69.219	209870000	18	2.58804	0	0.655873	3.45088	Q8NE71	Q8NE71	ATP-binding cassette sub-family F member 1	ABCF1	2233	up
-0.367659	-0.658599	-0.63784	-0.0469074	0.0190868	0.32914	+	Doc+_Doc-	8	8	8	13.9	13.9	13.9	72.453	0	69.112	392910000	20	1.88896	0.00302652	0.655139	2.63038	O00178	O00178	GTP-binding protein 1	GTPBP1	53	up
2.98941	2.97065	3.10712	3.65193	3.71399	3.66122	+	Doc+_Doc-	7	7	7	41.9	41.9	41.9	18.697	0	94.346	4687100000	29	2.93336	0	0.653316	4.44804	Q15185	Q15185	Prostaglandin E synthase 3	PTGES3	1750	up
1.52544	1.48055	1.61965	2.13669	2.20675	2.22962	+	Doc+_Doc-	43	43	42	16.6	16.6	16.4	394.46	0	323.31	1673800000	78	3.39028	0	0.649144	4.33884	P46939;Q13474	P46939	Utrophin	UTRN	1044	up
2.46834	2.45008	2.71391	3.19093	3.15676	3.23015	+	Doc+_Doc-	39	39	39	43.7	43.7	43.7	123.8	0	323.31	3354200000	119	1.89399	0.00344954	0.648505	3.45562	P18206	P18206	Vinculin	VCL	705	up
-0.0592518	0.0450907	0.270845	0.767715	0.774578	0.659218	+	Doc+_Doc-	5	5	5	21.3	21.3	21.3	31.282	0	55.393	612120000	22	1.88735	0.00328505	0.648276	3.17262	Q9UBX3	Q9UBX3	Mitochondrial dicarboxylate carrier	SLC25A10	3025	up
0.610611	-0.00746059	0.383415	0.96747	0.956139	0.999153	+	Doc+_Doc-	14	13	13	44.9	43	43	40.763	0	86.173	723380000	28	1.15883	0.0179213	0.645399	2.29717	Q08752	Q08752	Peptidyl-prolyl cis-trans isomerase D	PPID	1516	up
1.4635	1.60455	1.81626	2.22631	2.15097	2.44313	+	Doc+_Doc-	9	9	4	55.7	55.7	27.8	23.545	0	171.69	1773900000	48	2.03295	0.0031134	0.645368	2.7483	P61019	P61019	Ras-related protein Rab-2A	RAB2A	1264	up
-0.900249	-0.266627	-0.378817	0.182711	-0.0191212	0.221094	+	Doc+_Doc-	4	4	4	28.6	28.6	28.6	21.508	0	90.683	402700000	19	1.17848	0.0166429	0.643459	2.08274	Q13951	Q13951	Core-binding factor subunit beta	CBFB	1653	up
0.0690594	-0.322652	-0.079567	0.591305	0.575285	0.428665	+	Doc+_Doc-	9	9	9	16.4	16.4	16.4	66.69	0	60.331	533570000	25	1.76616	0.00358857	0.642805	2.85248	P17812	P17812	CTP synthase 1	CTPS1	696	up
2.5133	2.28651	2.32344	2.89464	3.00126	3.15108	+	Doc+_Doc-	9	8	8	35.5	31.9	31.9	36.688	0	94.855	2997300000	35	2.47586	0.000434968	0.641243	3.16958	P00338	P00338	L-lactate dehydrogenase A chain	LDHA	463	up
3.37772	3.28673	3.30456	3.91097	3.90766	4.07228	+	Doc+_Doc-	31	31	31	36.6	36.6	36.6	112.89	0	323.31	5729600000	134	2.72231	0	0.640632	3.97796	P05023;P13637;P50993;Q13733;P20648;P54707	P05023	Sodium/potassium-transporting ATPase subunit alpha-1	ATP1A1	505	up
2.13035	2.03163	2.14324	2.70937	2.68545	2.82871	+	Doc+_Doc-	12	9	9	54.1	43.9	43.9	28.218	0	131.92	2453000000	42	3.34002	0	0.639435	4.08268	Q04917	Q04917	14-3-3 protein eta	YWHAH	1483	up
2.0617	1.98103	2.1068	2.71234	2.56375	2.78319	+	Doc+_Doc-	10	10	10	53.8	53.8	53.8	24.899	0	137.8	2364900000	34	2.5683	0.000447368	0.636579	3.65032	Q9BT67	Q9BT67	NEDD4 family-interacting protein 1	NDFIP1	2609	up
-0.189856	-0.0687342	0.368546	0.508654	0.67741	0.83345	+	Doc+_Doc-	8	7	7	40.4	37.9	37.9	37.031	0	68.077	587040000	15	1.35909	0.0104994	0.636519	2.16654	Q15555	Q15555	Microtubule-associated protein RP/EB family member 2	MAPRE2	1781	up
0.433876	0.828462	0.773548	1.433	1.22816	1.28031	+	Doc+_Doc-	10	10	10	38.4	38.4	38.4	28.763	0	81.166	917620000	28	1.69527	0.00476757	0.635194	2.67049	Q9Y3A5	Q9Y3A5	Ribosome maturation protein SBDS	SBDS	3201	up
0.303362	0.0792589	0.208235	0.620817	0.949425	0.925739	+	Doc+_Doc-	19	19	19	9.1	9.1	9.1	319.1	0	174.92	655350000	34	1.94919	0.00308426	0.635042	2.83314	P50851	P50851	Lipopolysaccharide-responsive and beige-like anchor protein	LRBA	1125	up
3.26774	2.97673	3.17275	3.7095	3.65447	3.9546	+	Doc+_Doc-	24	24	24	32.4	32.4	32.4	106.87	0	316.73	5023400000	88	2.12972	0.0032415	0.633784	2.8056	Q14697	Q14697	Neutral alpha-glucosidase AB	GANAB	1708	up
-1.04911	-1.09134	-0.95916	-0.563	-0.384995	-0.265844	+	Doc+_Doc-	3	3	3	15	15	15	20.313	0	20.932	279730000	12	2.05654	0.00308688	0.628591	3.228	P61009	P61009	Signal peptidase complex subunit 3	SPCS3	1262	up
NaN	-2.37633	-2.10737	NaN	-1.76325	-1.46329	+	Doc+_Doc-	5	5	5	17.2	17.2	17.2	50.925	0	38.762	108720000	8	1.04331	0.0250074	0.628579	2.08524	O75312	O75312	Zinc finger protein ZPR1	ZPR1	308	up
5.77175	5.84413	5.90584	6.39029	6.44098	6.57537	+	Doc+_Doc-	19	19	19	73.1	73.1	73.1	36.053	0	323.31	33029000000	161	2.91168	0	0.628308	3.75195	P04406;O14556	P04406	Glyceraldehyde-3-phosphate dehydrogenase	GAPDH	493	up
0.437931	0.577514	0.811695	1.37877	1.04068	1.28883	+	Doc+_Doc-	4	4	4	30.5	30.5	30.5	17.222	0	35.073	871010000	18	1.8641	0.00336215	0.627048	2.52133	P62277	P62277	40S ribosomal protein S13	RPS13	1320	up
-0.517015	-0.536448	-0.179867	0.141294	0.356691	0.139088	+	Doc+_Doc-	9	9	4	20.9	20.9	11.1	58.951	0	74.904	428640000	15	1.81249	0.00344012	0.623468	2.63721	O43865	O43865	Putative adenosylhomocysteinase 2	AHCYL1	243	up
2.41147	2.40933	2.5581	2.95966	2.97628	3.30787	+	Doc+_Doc-	9	9	9	36.2	36.2	36.2	36.263	0	165	3114800000	59	1.72205	0.00447218	0.621636	2.77976	Q13642	Q13642	Four and a half LIM domains protein 1	FHL1	1642	up
-0.37698	-0.52521	-0.707882	-0.17882	0.298763	0.130522	+	Doc+_Doc-	5	5	5	41.4	41.4	41.4	17.676	0	81.526	392730000	18	1.57345	0.0062406	0.620179	2.30154	Q8WVJ2	Q8WVJ2	NudC domain-containing protein 2	NUDCD2	2300	up
0.289345	-0.435122	-0.055851	0.458075	0.549778	0.643135	+	Doc+_Doc-	10	10	9	23.7	23.7	21.6	58.47	0	92.569	541670000	17	1.04547	0.025136	0.617539	1.95469	O60749	O60749	Sorting nexin-2	SNX2	277	up
0.456417	0.303172	0.427513	0.861954	1.07643	1.10027	+	Doc+_Doc-	4	4	4	46.9	46.9	46.9	9.3697	0	29.51	743530000	18	2.36365	0.00212967	0.617185	3.26248	O00483	O00483	Cytochrome c oxidase subunit NDUFA4	NDUFA4	87	up
1.48766	1.30093	1.56791	1.9797	2.06472	2.16232	+	Doc+_Doc-	17	17	17	23.6	23.6	23.6	118.32	0	199.96	1551800000	60	2.33486	0.00234109	0.616743	3.16167	P53992	P53992	Protein transport protein Sec24C	SEC24C	1195	up
-2.45448	-2.34675	-2.48658	-1.80657	-2.20475	-1.4278	+	Doc+_Doc-	2	2	2	9.8	9.8	9.8	21.404	0.00067636	13.289	105920000	8	0.974037	0.0315989	0.616232	1.87727	P51965;Q96LR5;Q969T4	P51965;Q96LR5;Q969T4	Ubiquitin-conjugating enzyme E2 E1;Ubiquitin-conjugating enzyme E2 E2;Ubiquitin-conjugating enzyme E2 E3	UBE2E1;UBE2E2;UBE2E3	1156	up
1.0007	1.17326	1.14272	1.85492	1.47486	1.83308	+	Doc+_Doc-	9	9	9	35.2	35.2	35.2	37.489	0	153.42	1220200000	36	1.61934	0.0055444	0.61539	2.62774	Q9UHD1	Q9UHD1	Cysteine and histidine-rich domain-containing protein 1	CHORDC1	3047	up
0.702122	0.824773	0.928825	1.35404	1.30291	1.64361	+	Doc+_Doc-	7	7	6	9.5	9.5	8.5	80.529	0	54.049	995180000	24	1.90565	0.00342857	0.614947	2.73699	P46977	P46977	Dolichyl-diphosphooligosaccharide--protein glycosyltransferase subunit STT3A	STT3A	1046	up
0.881081	0.922042	0.716269	1.39098	1.26021	1.71079	+	Doc+_Doc-	7	7	7	25.4	25.4	25.4	50.287	0	91.11	1011000000	31	1.55039	0.00663882	0.614197	2.47789	Q15654	Q15654	Thyroid receptor-interacting protein 6	TRIP6	1789	up
1.97609	1.92357	2.01739	2.49492	2.59905	2.66329	+	Doc+_Doc-	9	9	5	42.8	42.8	23.1	23.593	0	100.49	2449800000	37	2.86428	0	0.613402	3.93036	P20340;Q14964	P20340	Ras-related protein Rab-6A	RAB6A	728	up
-3.16045	-3.79125	-3.16775	-2.70665	-3.03628	-2.54099	+	Doc+_Doc-	3	3	3	7.3	7.3	7.3	64.505	0	28.662	54836000	12	1.08639	0.0236876	0.611841	1.72472	P49023	P49023	Paxillin	PXN	1071	up
1.6346	1.54836	1.62495	2.15026	2.13932	2.3479	+	Doc+_Doc-	6	6	6	34.7	34.7	34.7	24.976	0	133.91	1707400000	50	2.2373	0.00328857	0.609859	3.52398	P49755	P49755	Transmembrane emp24 domain-containing protein 10	TMED10	1095	up
3.58854	3.51303	3.62554	4.1015	4.13175	4.32324	+	Doc+_Doc-	38	38	38	40	40	40	138.34	0	323.31	6702900000	137	2.30715	0.00292336	0.609794	3.44684	P53621	P53621	Coatomer subunit alpha;Xenin;Proxenin	COPA	1190	up
-1.34566	-1.02667	-0.932287	-0.650139	-0.440897	-0.386078	+	Doc+_Doc-	3	3	3	15.8	15.8	15.8	39.396	0	49.107	262470000	9	1.68882	0.00506596	0.609169	2.44933	Q15165	Q15165	Serum paraoxonase/arylesterase 2	PON2	1748	up
-1.45959	-1.39603	-0.831511	-1.01875	-0.626644	-0.217823	+	Doc+_Doc-	3	3	3	31	31	31	11.438	0	18.157	243060000	8	0.924767	0.0372287	0.607968	1.49943	Q9BV40	Q9BV40	Vesicle-associated membrane protein 8	VAMP8	2630	up
2.45032	2.41842	2.3146	2.96437	2.96389	3.07496	+	Doc+_Doc-	40	40	40	22.9	22.9	22.9	236.83	0	323.31	2963700000	113	3.3858	0	0.606624	3.90948	P42356;A4QPH2;Q8N8J0	P42356	Phosphatidylinositol 4-kinase alpha	PI4KA	997	up
2.61911	2.60525	2.50864	2.97589	3.23298	3.32743	+	Doc+_Doc-	11	11	11	71.4	71.4	71.4	26.922	0	184.36	3344900000	63	1.68556	0.0051817	0.601103	2.85374	O00299	O00299	Chloride intracellular channel protein 1	CLIC1	69	up
1.25634	1.12246	1.2926	1.75782	1.75784	1.95886	+	Doc+_Doc-	16	16	16	36.9	36.9	36.9	72.595	0	154.34	1307200000	54	2.58181	0.000432203	0.601038	3.25484	Q9H4A4	Q9H4A4	Aminopeptidase B	RNPEP	2754	up
1.30932	1.03076	1.16481	1.65641	1.81015	1.84048	+	Doc+_Doc-	13	13	12	32.9	32.9	31.2	66.248	0	179.61	1259200000	47	2.29126	0.00312015	0.600713	3.02521	Q5JTV8	Q5JTV8	Torsin-1A-interacting protein 1	TOR1AIP1	1889	up
0.483795	0.0672293	0.283447	0.722311	0.758183	1.15166	+	Doc+_Doc-	11	8	3	45.5	32.1	11	40.921	0	92.889	680160000	22	1.50433	0.00839298	0.599228	2.11961	P01892;P10316;P01891;P30512;P30459;P30453;P16190;P16189;P10314;P30457;P30456;P30450;P18462	P01892;P10316;P01891;P30512;P30459;P30453;P16190;P16189;P10314	HLA class I histocompatibility antigen, A-2 alpha chain;HLA class I histocompatibility antigen, A-69 alpha chain;HLA class I histocompatibility antigen, A-68 alpha chain;HLA class I histocompatibility antigen, A-29 alpha chain;HLA class I histocompatibility antigen, A-74 alpha chain;HLA class I histocompatibility antigen, A-34 alpha chain;HLA class I histocompatibility antigen, A-33 alpha chain;H…	HLA-A	479	up
-0.235592	-0.357017	-0.473223	0.385187	0.54248	-0.200802	+	Doc+_Doc-	15	15	15	25.9	25.9	25.9	80.954	0	109.94	449960000	20	0.966478	0.0330184	0.597566	1.77674	P35611	P35611	Alpha-adducin	ADD1	925	up
-2.57871	-3.21848	-3.3508	-2.68107	-2.31057	-2.3653	+	Doc+_Doc-	4	4	4	19.8	19.8	19.8	27.335	0	24.216	68144000	7	0.947187	0.0351525	0.597016	1.6362	Q9UKY7	Q9UKY7	Protein CDV3 homolog	CDV3	3094	up
0.136244	0.0993986	0.352922	0.854214	0.610615	0.914497	+	Doc+_Doc-	6	6	5	20.9	20.9	18.2	49.301	0	55.437	641610000	26	2.06458	0.00296563	0.59692	2.68886	O75351;Q6PIW4	O75351	Vacuolar protein sorting-associated protein 4B	VPS4B	313	up
3.15435	2.83468	3.15186	3.63788	3.63956	3.65371	+	Doc+_Doc-	12	12	12	39.7	39.7	39.7	34.362	0	123.3	4643900000	73	1.52326	0.00849231	0.596754	2.89318	P46777	P46777	60S ribosomal protein L5	RPL5	1035	up
-0.152254	-0.287103	-0.0893173	0.378988	0.312466	0.568792	+	Doc+_Doc-	5	5	5	24.8	24.8	24.8	34.932	0	60.257	494260000	26	2.36067	0.00231862	0.596307	3.03554	P16422	P16422	Epithelial cell adhesion molecule	EPCAM	683	up
1.65782	1.52275	1.37346	1.96213	2.20944	2.17109	+	Doc+_Doc-	8	4	4	36.6	22.8	22.8	28.082	0	145.98	1602400000	31	2.21058	0.00324731	0.596211	2.80611	P31946	P31946	14-3-3 protein beta/alpha;14-3-3 protein beta/alpha, N-terminally processed	YWHAB	886	up
-1.28541	-0.847596	-1.60574	-0.574371	-0.3666	-1.01471	+	Doc+_Doc-	5	5	5	23.3	23.3	23.3	37.375	0	39.241	241580000	9	0.950208	0.0352425	0.594356	1.51937	Q9UJ70	Q9UJ70	N-acetyl-D-glucosamine kinase	NAGK	3071	up
-0.489458	-0.836064	-0.740736	-0.268919	-0.113548	0.0836067	+	Doc+_Doc-	6	5	5	26.7	24	24	33.304	0	54.593	345530000	23	1.81254	0.00425591	0.589133	2.40237	Q00535	Q00535	Cyclin-dependent-like kinase 5	CDK5	1431	up
0.276522	0.384912	0.462416	1.03997	0.898251	0.9508	+	Doc+_Doc-	10	10	10	27.8	27.8	27.8	50.704	0	88.567	722840000	24	2.8852	0	0.588391	3.50337	P41240	P41240	Tyrosine-protein kinase CSK	CSK	985	up
-0.395397	-0.205014	-0.168783	0.143862	0.229097	0.614878	+	Doc+_Doc-	10	10	10	21.2	21.2	21.2	54.389	0	80.336	465630000	17	1.41949	0.0104667	0.585677	2.24356	P50995	P50995	Annexin A11	ANXA11	1130	up
1.12316	0.79209	0.914995	1.51759	1.44305	1.62617	+	Doc+_Doc-	12	12	12	44.4	44.4	44.4	38.274	0	102.07	1068800000	38	1.92421	0.00335215	0.585522	2.78444	O95433	O95433	Activator of 90 kDa heat shock protein ATPase homolog 1	AHSA1	428	up
-1.39252	-1.12511	-1.17759	-0.622997	-0.728605	-0.590822	+	Doc+_Doc-	8	8	8	11.7	11.7	11.7	90.954	0	57.757	236490000	19	2.09238	0.00295595	0.584263	3.04651	Q93034	Q93034	Cullin-5	CUL5	2367	up
1.23629	1.00293	0.885954	1.45042	1.62228	1.79867	+	Doc+_Doc-	7	7	7	45.8	45.8	45.8	26.319	0	109.78	1142200000	36	1.80788	0.00440331	0.582065	2.38634	Q13907;Q9BXS1	Q13907	Isopentenyl-diphosphate Delta-isomerase 1	IDI1	1652	up
1.65554	1.35653	1.54906	2.27569	1.93815	2.09305	+	Doc+_Doc-	5	5	5	36.4	36.4	36.4	18.998	0	48.562	1600700000	23	1.93443	0.00333728	0.581924	2.5187	P51571	P51571	Translocon-associated protein subunit delta	SSR4	1141	up
3.31405	3.26545	3.3856	3.8484	3.93569	3.91989	+	Doc+_Doc-	11	11	11	37.2	37.2	37.2	31.324	0	104.94	5551700000	63	3.55221	0	0.579626	4.02435	P15880	P15880	40S ribosomal protein S2	RPS2	677	up
-0.41264	-0.562737	-0.470623	-0.0612221	0.229471	0.124254	+	Doc+_Doc-	10	10	9	23.4	23.4	22.1	83.642	0	96.103	397290000	25	2.04121	0.00305994	0.579501	2.96338	Q9BXB4	Q9BXB4	Oxysterol-binding protein-related protein 11	OSBPL11	2653	up
-2.46734	-2.34441	-2.3982	-2.08458	-1.81348	-1.59172	+	Doc+_Doc-	4	4	4	8	8	8	81.312	0	30.153	104450000	9	1.30686	0.0148608	0.573389	2.32248	Q99661	Q99661	Kinesin-like protein KIF2C	KIF2C	2556	up
NaN	-1.87431	-1.87687	-1.52725	-1.30068	-1.08302	+	Doc+_Doc-	4	4	4	8	8	8	58.309	0	23.44	140770000	8	1.33006	0.0143582	0.571942	2.50573	Q96QD5	Q96QD5	DEP domain-containing protein 7	DEPDC7	2506	up
-1.04464	-0.945788	-0.762001	-0.258982	-0.608366	-0.174479	+	Doc+_Doc-	5	5	5	21.3	21.3	21.3	36.748	0	50.651	292920000	14	1.5282	0.00875613	0.570202	2.22294	Q9NUQ9;Q9H0Q0	Q9NUQ9	Protein FAM49B	FAM49B	2897	up
-2.18498	NaN	-1.93527	-1.68731	-1.46843	-1.31838	+	Doc+_Doc-	3	3	3	20.4	20.4	20.4	32.668	0	33.875	124670000	10	1.23547	0.0168609	0.568756	2.15023	P46926;Q8TDQ7	P46926;Q8TDQ7	Glucosamine-6-phosphate isomerase 1;Glucosamine-6-phosphate isomerase 2	GNPDA1;GNPDA2	1042	up
5.74354	5.65234	5.83301	6.23384	6.2864	6.41422	+	Doc+_Doc-	36	24	23	54.2	37.8	36.9	84.659	0	323.31	29645000000	204	2.79345	0.000456376	0.568522	3.25319	P07900;Q14568;Q58FG0	P07900	Heat shock protein HSP 90-alpha	HSP90AA1	544	up
-1.31122	-0.976626	-1.27728	-0.625683	-0.83215	-0.403753	+	Doc+_Doc-	6	6	6	19.8	19.8	19.8	58.042	0	81.318	241950000	16	1.5809	0.00819277	0.567847	2.15819	Q13177;Q13153;O75914	Q13177	Serine/threonine-protein kinase PAK 2;PAK-2p27;PAK-2p34	PAK2	1581	up
2.20565	2.229	2.2245	2.80638	2.6746	2.87057	+	Doc+_Doc-	19	19	19	44.6	44.6	44.6	55.704	0	245.52	2557700000	66	2.02433	0.00331765	0.564132	3.56765	P61011	P61011	Signal recognition particle 54 kDa protein	SRP54	1263	up
-0.34601	-0.457038	0.0149002	0.0680256	0.0632153	0.763229	+	Doc+_Doc-	4	4	4	34.3	34.3	34.3	14.96	0	40.398	462150000	10	0.909411	0.0421694	0.560873	1.50486	Q9NPJ3	Q9NPJ3	Acyl-coenzyme A thioesterase 13;Acyl-coenzyme A thioesterase 13, N-terminally processed	ACOT13	2840	up
1.70675	1.66489	1.91766	2.31439	2.08137	2.57229	+	Doc+_Doc-	6	6	6	77.8	77.8	77.8	13.802	0	97.615	1864700000	22	1.41492	0.0107373	0.559581	2.13644	P49773	P49773	Histidine triad nucleotide-binding protein 1	HINT1	1099	up
-1.04868	-0.868941	-0.961525	-0.377708	-0.500931	-0.32184	+	Doc+_Doc-	5	5	5	12.9	12.9	12.9	60.246	0	69.43	281670000	21	2.7823	0.000445415	0.559555	3.21387	Q13564	Q13564	NEDD8-activating enzyme E1 regulatory subunit	NAE1	1624	up
1.62618	1.50617	1.35404	2.02692	1.97617	2.15338	+	Doc+_Doc-	10	10	10	56.1	56.1	56.1	28.772	0	138.33	1542000000	49	2.19751	0.00306081	0.556695	2.85857	Q9Y696	Q9Y696	Chloride intracellular channel protein 4	CLIC4	3280	up
3.57694	3.47913	3.49741	3.98873	4.07102	4.15323	+	Doc+_Doc-	22	22	22	63.4	63.4	63.4	47.996	0	323.31	6280000000	102	2.87726	0.000451327	0.553166	3.54174	Q9UGI8	Q9UGI8	Testin	TES	3037	up
-0.330534	-0.284215	-0.237457	0.289528	0.207512	0.309832	+	Doc+_Doc-	7	7	6	20.7	20.7	18.9	59.179	0	79.618	448380000	28	3.68838	0	0.553026	3.91569	Q92783	Q92783	Signal transducing adapter molecule 1	STAM	2343	up
2.2393	2.51782	2.53061	2.92997	2.90598	3.09525	+	Doc+_Doc-	17	10	8	46	30.3	25.6	49.857	0	169.25	3002900000	52	1.90164	0.00370745	0.547821	2.58249	Q9BUF5	Q9BUF5	Tubulin beta-6 chain	TUBB6	2622	up
0.16824	0.414498	0.114147	0.591022	0.888582	0.859785	+	Doc+_Doc-	7	7	6	20.8	20.8	17	44.877	0	62.586	640490000	30	1.84045	0.00474832	0.547502	2.35618	P31350	P31350	Ribonucleoside-diphosphate reductase subunit M2	RRM2	878	up
2.48791	2.36698	2.52164	3.19965	2.79469	3.02437	+	Doc+_Doc-	8	8	8	46.2	46.2	46.2	18.565	0	78.236	3012600000	37	1.52858	0.00919306	0.547393	2.41882	P46778	P46778	60S ribosomal protein L21	RPL21	1036	up
2.20364	2.14931	2.29953	2.65928	2.6937	2.93178	+	Doc+_Doc-	6	6	6	38.3	38.3	38.3	21.634	0	81.319	2524400000	18	1.95329	0.00342529	0.544096	2.77214	Q07020	Q07020	60S ribosomal protein L18	RPL18	1496	up
-0.268751	-0.207217	-0.0180378	0.264854	0.384695	0.486502	+	Doc+_Doc-	12	12	12	16.6	16.6	16.6	111.08	0	87.742	484290000	30	2.23806	0.00306599	0.543352	2.73092	Q9Y6Y8	Q9Y6Y8	SEC23-interacting protein	SEC23IP	3306	up
1.67102	1.48523	1.54252	2.02894	2.1128	2.18424	+	Doc+_Doc-	8	8	8	42.5	42.5	42.5	24.604	0	122.99	1612200000	35	2.73604	0.000677686	0.542403	3.17321	P27635;Q96L21	P27635	60S ribosomal protein L10	RPL10	817	up
8.10723	7.98358	8.13581	8.55019	8.52758	8.77363	+	Doc+_Doc-	25	25	3	67.2	67.2	12.6	49.83	0	323.31	152860000000	405	2.12085	0.00304075	0.541589	2.83013	P68371;P04350	P68371;P04350	Tubulin beta-4B chain;Tubulin beta-4A chain	TUBB4B;TUBB4A	1383	up
1.02257	0.832377	0.965599	1.36789	1.43211	1.64446	+	Doc+_Doc-	20	20	20	20.7	20.7	20.7	142.69	0	209.74	1040100000	53	2.07744	0.00326994	0.541302	2.69575	Q9H2G2	Q9H2G2	STE20-like serine/threonine-protein kinase	SLK	2733	up
1.63039	1.55584	1.56146	2.07763	2.08616	2.20027	+	Doc+_Doc-	8	8	8	45.4	45.4	45.4	20.9	0	120.58	1621200000	21	3.06432	0	0.538789	3.68438	P61081	P61081	NEDD8-conjugating enzyme Ubc12	UBE2M	1270	up
0.990349	1.00092	1.07986	1.5512	1.51603	1.61786	+	Doc+_Doc-	7	7	2	41.8	41.8	14.1	20.987	0	79.803	1100600000	30	3.69813	0	0.537984	3.81276	P62834	P62834	Ras-related protein Rap-1A	RAP1A	1342	up
4.37076	4.43638	4.55112	4.99971	4.84422	5.12451	+	Doc+_Doc-	13	13	13	61.4	61.4	61.4	23.356	0	323.31	11870000000	93	2.09777	0.00328	0.536729	2.72867	P09211	P09211	Glutathione S-transferase P	GSTP1	572	up
0.47257	0.498858	0.637138	0.951731	0.938116	1.32676	+	Doc+_Doc-	12	12	12	40.2	40.2	40.2	42.621	0	142.05	784710000	33	1.42334	0.0119651	0.536012	2.25987	P35237;P50452	P35237	Serpin B6	SERPINB6	911	up
-1.58791	-1.80695	-2.26262	-1.11808	-1.54249	-1.39152	+	Doc+_Doc-	6	6	6	19.1	19.1	19.1	45.096	0	38.629	148240000	14	1.01225	0.0331349	0.535128	1.60053	Q8N2K0	Q8N2K0	Monoacylglycerol lipase ABHD12	ABHD12	2176	up
-0.416021	-0.538142	-0.411957	-0.0770702	0.128778	0.186848	+	Doc+_Doc-	5	5	5	11.1	11.1	11.1	47.514	0	30.24	394260000	13	2.01852	0.00332253	0.534892	2.81316	Q8TB61	Q8TB61	Adenosine 3-phospho 5-phosphosulfate transporter 1	SLC35B2	2261	up
-0.27766	0.114303	-0.338411	0.39179	0.100868	0.601906	+	Doc+_Doc-	3	3	3	18.8	18.8	18.8	20.848	0	23.706	483070000	8	1.23067	0.0194229	0.532111	1.75588	Q5BJF2	Q5BJF2	Transmembrane protein 97	TMEM97	1875	up
-0.774622	-1.05328	-0.897346	-0.470657	-0.427954	-0.231962	+	Doc+_Doc-	9	8	8	25.1	23	23	51.263	0	54.131	287420000	15	2.07651	0.00340785	0.531558	2.54216	Q8NFQ8	Q8NFQ8	Torsin-1A-interacting protein 2	TOR1AIP2	2247	up
2.26842	2.31102	2.51716	2.75623	2.89676	3.03497	+	Doc+_Doc-	12	12	12	58.8	58.8	58.8	26.21	0	106.86	2780100000	32	2.05079	0.00334718	0.530456	2.51117	Q9HB71	Q9HB71	Calcyclin-binding protein	CACYBP	2804	up
-1.36284	-1.11627	-1.30377	-1.03426	-0.296892	-0.865507	+	Doc+_Doc-	2	2	2	9.7	9.7	9.7	26.638	0.00035323	15.221	229820000	7	0.88506	0.047271	0.528742	1.57783	O75352	O75352	Mannose-P-dolichol utilization defect 1 protein	MPDU1	314	up
-0.654577	-0.963191	NaN	-0.19383	-0.373051	NaN	+	Doc+_Doc-	4	4	4	33.8	33.8	33.8	21.701	0	42.375	288960000	5	0.896398	0.0460425	0.525444	1.8871	Q3MHD2	Q3MHD2	Protein LSM12 homolog	LSM12	1849	up
0.825783	0.784001	1.10827	1.34904	1.46965	1.47549	+	Doc+_Doc-	13	13	13	31	31	31	63.146	0	124.52	1008900000	35	1.63535	0.00818291	0.525376	2.50341	P06744;CON__Q3ZBD7;Q8N196	P06744	Glucose-6-phosphate isomerase	GPI	527	up
-0.368587	-0.519473	-0.906036	-0.243616	0.107252	-0.0836525	+	Doc+_Doc-	13	13	13	21.4	21.4	21.4	97.071	0	123.1	357590000	28	1.21621	0.0205034	0.524693	1.81259	P33981	P33981	Dual specificity protein kinase TTK	TTK	896	up
-2.08437	-1.77199	-1.75484	-1.43107	-1.40817	-1.20743	+	Doc+_Doc-	4	4	4	10.1	10.1	10.1	59.356	0	31.364	146770000	10	1.69184	0.00676622	0.521513	2.28215	Q8WVX9	Q8WVX9	Fatty acyl-CoA reductase 1	FAR1	2302	up
2.19513	2.22402	2.27191	2.66633	2.71654	2.87023	+	Doc+_Doc-	21	21	21	43.8	43.8	43.8	57.21	0	191.76	2515200000	69	2.12605	0.00339248	0.520682	3.15003	P48444	P48444	Coatomer subunit delta	ARCN1	1057	up
-1.09605	-1.37021	-1.15763	-0.732388	-0.618103	-0.713413	+	Doc+_Doc-	6	6	6	27.2	27.2	27.2	32.193	0	69.914	232710000	24	1.8612	0.00496424	0.519996	2.73306	Q14192	Q14192	Four and a half LIM domains protein 2	FHL2	1672	up
2.87707	2.90467	2.9675	3.33048	3.43175	3.53688	+	Doc+_Doc-	12	12	12	59.4	59.4	59.4	23.489	0	270.4	4038000000	53	2.25611	0.00309904	0.516623	3.12504	P51149	P51149	Ras-related protein Rab-7a	RAB7A	1134	up
-0.0200615	0.188468	-0.162632	0.332027	0.605154	0.615311	+	Doc+_Doc-	7	7	7	56	56	56	14.285	0	71.941	536590000	21	1.68958	0.00797087	0.515573	2.16766	O14737	O14737	Programmed cell death protein 5	PDCD5	120	up
-1.06179	-1.36083	-1.41478	-0.54459	-0.914709	-0.831902	+	Doc+_Doc-	5	5	5	10.1	10.1	10.1	70.754	0	40.441	222620000	19	1.51707	0.0105112	0.515397	2.00593	Q13492;O60641	Q13492	Phosphatidylinositol-binding clathrin assembly protein	PICALM	1614	up
0.7724	0.77822	0.969166	1.21975	1.2738	1.57103	+	Doc+_Doc-	10	10	9	39.6	39.6	35.8	40.925	0	115.03	957230000	29	1.63498	0.00848227	0.514932	2.2694	O60256	O60256	Phosphoribosyl pyrophosphate synthase-associated protein 2	PRPSAP2	251	up
-0.218056	-0.308703	-0.311157	0.237228	0.148144	0.32118	+	Doc+_Doc-	6	6	6	44.9	44.9	44.9	20.692	0	47.26	440590000	20	2.68243	0.00234563	0.514823	3.246	Q9BYD1	Q9BYD1	39S ribosomal protein L13, mitochondrial	MRPL13	2668	up
-0.112862	-0.679341	-0.564817	-0.0227795	0.153929	0.0515442	+	Doc+_Doc-	10	10	9	27.5	27.5	25	46.816	0	64.77	392610000	18	1.06064	0.0298983	0.513238	1.83066	Q9Y5X3	Q9Y5X3	Sorting nexin-5	SNX5	3270	up
-1.54216	-1.51487	-1.0174	-0.995146	NaN	-0.696995	+	Doc+_Doc-	3	3	3	10	10	10	35.936	0	24.249	174400000	9	0.947582	0.0412711	0.512074	1.56828	P08758	P08758	Annexin A5	ANXA5	567	up
2.02004	1.97637	2.07684	2.50661	2.51649	2.57592	+	Doc+_Doc-	22	22	22	33.4	33.4	33.4	102.49	0	289.67	2168200000	61	3.61284	0	0.508589	3.73259	P35606	P35606	Coatomer subunit beta	COPB2	923	up
-1.6521	-1.86115	-1.68734	-1.36829	-1.07043	-1.23979	+	Doc+_Doc-	9	9	9	14.5	14.5	14.5	94.573	0	76.406	160780000	19	1.954	0.00451507	0.507356	2.44186	P13591	P13591	Neural cell adhesion molecule 1	NCAM1	642	up
6.86832	6.70147	6.78837	7.20695	7.31825	7.35343	+	Doc+_Doc-	46	46	45	53.5	53.5	52.3	95.337	0	323.31	59179000000	361	2.8136	0.0015261	0.506824	3.06521	P13639	P13639	Elongation factor 2	EEF2	643	up
-0.871735	-1.19867	-0.915497	-0.538218	-0.469297	-0.468636	+	Doc+_Doc-	7	6	6	18.8	15.9	15.9	53.082	0	58.495	267030000	17	1.47196	0.011926	0.50325	2.45446	P34896	P34896	Serine hydroxymethyltransferase, cytosolic	SHMT1	901	up
0.000583649	-0.0128012	0.133163	0.488897	0.322659	0.813545	+	Doc+_Doc-	4	4	4	18.3	18.3	18.3	23.563	0	66.797	550400000	12	1.20726	0.0213217	0.501385	1.99369	O75251	O75251	NADH dehydrogenase [ubiquinone] iron-sulfur protein 7, mitochondrial	NDUFS7	306	up
0.666487	1.07058	0.92058	1.50146	1.33371	1.32556	+	Doc+_Doc-	8	8	8	44.1	44.1	44.1	28.804	0	99.299	986070000	37	1.47385	0.011939	0.501028	2.16774	P18669;P15259;Q8N0Y7	P18669;P15259	Phosphoglycerate mutase 1;Phosphoglycerate mutase 2	PGAM1;PGAM2	709	up
-0.052515	0.133157	0.0722427	0.272501	0.551672	0.827284	+	Doc+_Doc-	12	12	12	20.5	20.5	20.5	93.52	0	114.45	550890000	22	1.11605	0.0263671	0.499524	1.85546	Q86Y56	Q86Y56	Dynein assembly factor 5, axonemal	DNAAF5	2113	up
5.20951	5.15045	5.28374	5.59586	5.62125	5.92057	+	Doc+_Doc-	24	7	1	69.2	27.4	2.7	49.906	0	224.12	21135000000	80	1.53277	0.010523	0.497998	2.35834	Q13885	Q13885	Tubulin beta-2A chain	TUBB2A	1651	up
1.58025	1.59487	1.71661	1.85343	2.12246	2.40915	+	Doc+_Doc-	10	10	10	54.3	54.3	54.3	33.824	0	141.06	1653500000	41	1.09036	0.0280252	0.497773	1.87013	P19623	P19623	Spermidine synthase	SRM	720	up
-0.725321	-0.666715	-0.743057	-0.331558	-0.225525	-0.0935822	+	Doc+_Doc-	5	5	5	19.4	19.4	19.4	36.573	0	50.48	322770000	15	1.91928	0.00505263	0.494809	2.86687	P14550	P14550	Alcohol dehydrogenase [NADP(+)]	AKR1A1	660	up
0.678921	0.602458	0.490009	0.958164	1.14015	1.15189	+	Doc+_Doc-	7	7	7	28.9	28.9	28.9	36.249	0	79.699	797410000	26	2.3646	0.0029901	0.492938	2.68893	P53597	P53597	Succinyl-CoA ligase [ADP/GDP-forming] subunit alpha, mitochondrial	SUCLG1	1187	up
7.54373	7.48345	7.67622	8.02562	7.99443	8.1561	+	Doc+_Doc-	38	37	22	56.5	54.8	34	83.263	0	323.31	104200000000	375	2.51197	0.00320708	0.49092	2.79797	P08238;Q58FF7;Q58FF6	P08238	Heat shock protein HSP 90-beta	HSP90AB1	556	up
2.57881	2.63498	2.56996	2.99747	3.01631	3.23757	+	Doc+_Doc-	7	7	7	46.6	46.6	46.6	23.207	0	103.81	3198600000	36	1.73287	0.00823245	0.4892	2.72186	P52565	P52565	Rho GDP-dissociation inhibitor 1	ARHGDIA	1166	up
-0.373199	-0.593987	-0.92898	-0.241486	-0.303741	0.11586	+	Doc+_Doc-	5	5	5	36.4	36.4	36.4	26.47	0	57.847	341600000	11	1.09079	0.0302317	0.488933	1.58831	Q9NPA0	Q9NPA0	ER membrane protein complex subunit 7	EMC7	2834	up
-1.31505	-1.01013	-1.175	-0.782795	-0.5345	-0.729385	+	Doc+_Doc-	6	6	6	56.5	56.5	56.5	20.749	0	66.857	235340000	15	1.83392	0.00604792	0.484501	2.24293	Q96EK6	Q96EK6	Glucosamine 6-phosphate N-acetyltransferase	GNPNAT1	2429	up
2.16157	1.70806	1.8777	2.16547	2.59301	2.44166	+	Doc+_Doc-	8	8	8	51.1	51.1	51.1	15.747	0	60.813	1998900000	28	1.247	0.0213113	0.484269	1.71655	P46779	P46779	60S ribosomal protein L28	RPL28	1037	up
-1.0929	-1.36948	-1.17234	-0.977459	-0.623671	-0.582539	+	Doc+_Doc-	8	8	8	9.5	9.5	9.5	137.42	0	68.082	227780000	16	1.40216	0.0156763	0.483684	1.93547	O95487	O95487	Protein transport protein Sec24B	SEC24B	434	up
-1.32069	-1.13999	-1.00593	-0.649494	-0.62167	-0.745592	+	Doc+_Doc-	9	9	9	7.2	7.2	7.2	213.7	0	68.081	236960000	14	1.6688	0.00898719	0.483286	2.4332	Q5JRA6	Q5JRA6	Melanoma inhibitory activity protein 3	MIA3	1884	up
1.67639	1.70643	1.65557	1.99649	2.12081	2.3628	+	Doc+_Doc-	13	13	13	39	39	39	50.097	0	125.2	1681200000	43	1.35348	0.0165499	0.480571	2.30427	P30520	P30520	Adenylosuccinate synthetase isozyme 2	ADSS	868	up
-0.945625	-1.03599	-1.37643	-0.589729	-0.470226	-0.856964	+	Doc+_Doc-	3	3	3	38.6	38.6	38.6	14.478	0	44.1	244670000	11	1.28522	0.0201732	0.480376	1.75325	P61970	P61970	Nuclear transport factor 2	NUTF2	1301	up
4.79287	4.68836	4.86469	5.22087	5.21047	5.35286	+	Doc+_Doc-	12	12	2	38.6	38.6	7	32.866	0	111.12	14504000000	75	2.63457	0.00329455	0.479428	2.84179	P12236	P12236	ADP/ATP translocase 3;ADP/ATP translocase 3, N-terminally processed	SLC25A6	629	up
-0.0825176	-0.18683	-0.303984	0.417801	0.195959	0.251005	+	Doc+_Doc-	9	9	9	20.8	20.8	20.8	80.172	0	137.5	461770000	25	2.18016	0.00330307	0.479365	2.49135	Q86TG7	Q86TG7	Retrotransposon-derived protein PEG10	PEG10	2080	up
3.83355	3.89676	3.81965	4.2492	4.19975	4.53215	+	Doc+_Doc-	16	16	16	44.5	44.5	44.5	57.548	0	286.32	8114200000	107	1.41703	0.015419	0.477042	2.31315	P49257	P49257	Protein ERGIC-53	LMAN1	1074	up
4.29985	4.25998	4.22797	4.68674	4.70567	4.82523	+	Doc+_Doc-	82	82	82	46.2	46.2	46.2	269.76	0	323.31	10051000000	285	2.58267	0.00316783	0.476614	3.21856	Q9Y490;Q9Y4G6	Q9Y490	Talin-1	TLN1	3223	up
-2.02274	-1.72601	-1.93793	-1.37581	-1.49551	-1.38586	+	Doc+_Doc-	3	3	3	17.3	17.3	17.3	25.497	0	33.384	141030000	12	1.70582	0.00844235	0.476499	2.42855	Q9Y2Q3	Q9Y2Q3	Glutathione S-transferase kappa 1	GSTK1	3178	up
-1.37578	-1.63809	-1.55296	-1.15022	-1.12833	-0.859978	+	Doc+_Doc-	8	8	8	19.5	19.5	19.5	62.974	0	82.423	182400000	15	1.73843	0.00810489	0.476103	2.15288	Q969V3	Q969V3	Nicalin	NCLN	2379	up
0.0818157	0.416486	0.0596771	0.610924	0.659868	0.710995	+	Doc+_Doc-	8	8	8	21.9	21.9	21.9	40.589	0	86.622	596040000	18	1.3263	0.0181349	0.474603	2.16729	P17612;P22694	P17612;P22694	cAMP-dependent protein kinase catalytic subunit alpha;cAMP-dependent protein kinase catalytic subunit beta	PRKACA;PRKACB	693	up
-0.989613	-1.50259	-0.973469	-0.954042	-0.604254	-0.494644	+	Doc+_Doc-	4	4	4	22.2	22.2	22.2	25.079	0	28.171	235930000	17	0.979409	0.0422108	0.470912	1.4615	Q9H8S9;Q7L9L4	Q9H8S9;Q7L9L4	MOB kinase activator 1A;MOB kinase activator 1B	MOB1A;MOB1B	2036	up
1.66443	1.6813	1.86994	1.93166	2.19449	2.49625	+	Doc+_Doc-	4	4	4	17.8	17.8	17.8	41.522	0	59.738	1749800000	21	1.05947	0.0340069	0.468912	1.69951	O00767	O00767	Acyl-CoA desaturase	SCD	98	up
-0.322107	-0.636336	-0.624777	-0.305912	-0.0959949	0.22508	+	Doc+_Doc-	5	5	5	15.8	15.8	15.8	76.096	0	75.408	363150000	14	1.13031	0.0280467	0.468798	1.64185	O96005	O96005	Cleft lip and palate transmembrane protein 1	CLPTM1	459	up
-0.17782	0.0298643	0.00119781	0.201319	0.484179	0.57148	+	Doc+_Doc-	8	8	8	19.1	19.1	19.1	58.777	0	65.124	504740000	14	1.49041	0.013938	0.467912	2.04115	P49591	P49591	Serine--tRNA ligase, cytoplasmic	SARS	1087	up
0.864773	0.833787	0.927202	1.32961	1.25343	1.44566	+	Doc+_Doc-	4	4	4	37.4	37.4	37.4	13.015	0	32.729	956330000	15	2.2666	0.00335714	0.467645	2.88178	P62854;Q5JNZ5	P62854;Q5JNZ5	40S ribosomal protein S26;Putative 40S ribosomal protein S26-like 1	RPS26;RPS26P11	1344	up
-0.290058	-0.19567	-0.284451	0.236988	0.197361	0.190128	+	Doc+_Doc-	3	3	3	21.8	21.8	21.8	25.569	0	33.689	436510000	17	2.97456	0.00275758	0.464885	3.47284	P68402	P68402	Platelet-activating factor acetylhydrolase IB subunit beta	PAFAH1B2	1385	up
-0.0180454	-0.228889	0.20146	0.425102	0.420698	0.501369	+	Doc+_Doc-	5	5	3	34	34	21.8	16.495	0	52.433	516040000	16	1.22802	0.0232321	0.464215	2.04528	Q13404	Q13404	Ubiquitin-conjugating enzyme E2 variant 1	UBE2V1	1600	up
2.19296	2.07028	2.24676	2.54198	2.63946	2.72073	+	Doc+_Doc-	10	10	10	36	36	36	35.619	0	98.191	2342000000	53	2.49296	0.00300498	0.464061	2.67525	Q9H9B4	Q9H9B4	Sideroflexin-1	SFXN1	2789	up
0.313578	0.84505	0.720003	0.986477	0.984308	1.29636	+	Doc+_Doc-	2	2	2	12.2	12.2	12.2	26.352	0	29.048	804500000	17	1.07923	0.0332729	0.462839	1.59048	Q15125	Q15125	3-beta-hydroxysteroid-Delta(8),Delta(7)-isomerase	EBP	1743	up
0.0856342	0.017972	0.309307	0.673389	0.496443	0.625364	+	Doc+_Doc-	7	7	7	36.8	36.8	36.8	20.505	0	88.417	573160000	24	1.76741	0.00809524	0.460761	2.27351	Q9UBQ0	Q9UBQ0	Vacuolar protein sorting-associated protein 29	VPS29	3012	up
0.881733	0.910558	0.992502	1.40678	1.26192	1.48929	+	Doc+_Doc-	10	10	10	40.3	40.3	40.3	37.636	0	99.62	987590000	39	2.03949	0.00485638	0.45773	2.62647	O00170	O00170	AH receptor-interacting protein	AIP	52	up
0.201542	0.272532	0.305576	0.625143	0.710443	0.813545	+	Doc+_Doc-	7	7	7	26.6	26.6	26.6	41.796	0	60.176	620340000	34	2.34954	0.00343902	0.456494	2.80886	O00154	O00154	Cytosolic acyl coenzyme A thioester hydrolase	ACOT7	48	up
1.01032	0.539779	0.919296	0.947916	1.48658	1.39961	+	Doc+_Doc-	7	7	7	19.5	19.5	19.5	57.818	0	55.835	925030000	17	0.960134	0.0463837	0.454904	1.41918	O95376	O95376	E3 ubiquitin-protein ligase ARIH2	ARIH2	425	up
1.63084	1.40125	1.5886	1.81343	2.00333	2.15987	+	Doc+_Doc-	5	5	5	30.8	30.8	30.8	13.293	0	36.278	1505100000	28	1.59559	0.0110911	0.45198	2.03124	P49207	P49207	60S ribosomal protein L34	RPL34	1073	up
1.26435	1.379	1.44174	1.57779	1.83529	2.02237	+	Doc+_Doc-	7	7	7	54.6	54.6	54.6	18.243	0	109.53	1329300000	26	1.24031	0.0237227	0.450117	1.88378	Q13526	Q13526	Peptidyl-prolyl cis-trans isomerase NIMA-interacting 1	PIN1	1618	up
2.28251	2.12545	2.11235	2.49585	2.59105	2.78374	+	Doc+_Doc-	13	13	13	55.2	55.2	55.2	29.717	0	168.4	2343300000	65	1.80216	0.00812425	0.450109	2.24164	Q14847	Q14847	LIM and SH3 domain protein 1	LASP1	1715	up
0.835865	0.775393	1.28735	1.42114	1.27041	1.55704	+	Doc+_Doc-	14	14	14	25.6	25.6	25.6	86.16	0	159.4	1031100000	50	1.04668	0.0368772	0.449995	1.59858	Q15436	Q15436	Protein transport protein Sec23A	SEC23A	1776	up
-2.19555	-2.35071	NaN	-1.69637	-1.6808	-2.09344	+	Doc+_Doc-	2	2	2	3.1	3.1	3.1	119.75	0	28.924	104220000	8	1.18279	0.0261848	0.449589	1.75808	O95486	O95486	Protein transport protein Sec24A	SEC24A	433	up
-1.2275	-0.768798	-0.837452	-0.532118	-0.678698	-0.277842	+	Doc+_Doc-	4	4	4	54.5	54.5	54.5	16.014	0	41.023	268920000	9	1.12709	0.0319113	0.448364	1.57484	Q9UK76	Q9UK76	Hematological and neurological expressed 1 protein;Hematological and neurological expressed 1 protein, N-terminally processed	HN1	3082	up
0.430012	0.409263	0.482328	0.758196	0.905596	1.0014	+	Doc+_Doc-	10	10	10	37.1	37.1	37.1	40.542	0	114.84	700060000	25	1.76627	0.00897674	0.447862	2.57398	Q9Y295	Q9Y295	Developmentally-regulated GTP-binding protein 1	DRG1	3164	up
1.61514	1.49868	1.44136	1.78587	1.986	2.12601	+	Doc+_Doc-	11	11	11	33	33	33	45.745	0	119.59	1478600000	34	1.56056	0.0128423	0.447568	2.11963	O60884	O60884	DnaJ homolog subfamily A member 2	DNAJA2	288	up
2.31987	2.12788	2.31055	2.60122	2.71472	2.78096	+	Doc+_Doc-	23	23	23	49.5	49.5	49.5	65.401	0	224.68	2457800000	79	2.22712	0.00374432	0.446201	2.45684	Q9UHD8	Q9UHD8	Septin-9	SEPT9	3049	up
0.201303	0.0212164	0.0118046	0.468046	0.431131	0.661636	+	Doc+_Doc-	3	3	3	51	51	51	10.921	0	56.998	548960000	14	2.00363	0.00540568	0.442163	2.27451	Q9NP97;Q8TF09	Q9NP97	Dynein light chain roadblock-type 1	DYNLRB1	2833	up
2.89249	2.78794	2.93042	3.25899	3.24454	3.42971	+	Doc+_Doc-	10	10	9	30.5	30.5	26.9	36.638	0	91.707	3765400000	61	2.28291	0.00342037	0.440799	2.54576	P07195;Q6ZMR3;P07864	P07195	L-lactate dehydrogenase B chain	LDHB	531	up
-1.9583	-1.80794	-1.71647	-1.37986	-1.53144	-1.25042	+	Doc+_Doc-	6	6	6	6.5	6.5	6.5	141.29	0	44.028	144920000	16	1.80906	0.00841266	0.440326	2.12168	Q9C0C9	Q9C0C9	E2/E3 hybrid ubiquitin-protein ligase UBE2O	UBE2O	2693	up
0.473633	0.517575	0.321995	0.74819	0.894014	0.989059	+	Doc+_Doc-	9	9	9	27.4	27.4	27.4	71.456	0	98.455	699570000	36	2.03041	0.0053022	0.439354	2.2914	Q13409	Q13409	Cytoplasmic dynein 1 intermediate chain 2	DYNC1I2	1601	up
-0.635115	-0.646373	-0.378275	-0.288864	-0.195772	0.140701	+	Doc+_Doc-	11	3	3	36.2	10.4	10.4	33.064	0	21.822	350460000	13	1.24147	0.0250047	0.438609	1.70583	P12235	P12235	ADP/ATP translocase 1	SLC25A4	628	up
-0.874937	-1.01084	-0.85989	-0.389931	-0.532682	-0.508194	+	Doc+_Doc-	4	4	4	36	36	36	18.154	0	51.37	273140000	14	2.5829	0.00314425	0.438287	2.65356	Q9H2H8	Q9H2H8	Peptidyl-prolyl cis-trans isomerase-like 3	PPIL3	2734	up
0.840391	0.920175	1.00763	1.34737	1.14564	1.58417	+	Doc+_Doc-	2	2	2	14.9	14.9	14.9	16.561	0	26.33	974110000	12	1.21898	0.0253038	0.436326	1.85183	P46776	P46776	60S ribosomal protein L27a	RPL27A	1034	up
-1.0115	-1.25967	-1.31124	-0.830912	-0.767593	-0.675472	+	Doc+_Doc-	6	6	6	11.8	11.8	11.8	88.754	0	44.029	224300000	16	1.58951	0.0127359	0.436144	2.14909	Q9UBV2	Q9UBV2	Protein sel-1 homolog 1	SEL1L	3022	up
0.831209	0.994634	1.00575	1.23145	1.50279	1.40269	+	Doc+_Doc-	5	5	5	53.6	53.6	53.6	13.832	0	70.925	1037900000	31	1.85734	0.00816327	0.435113	2.20578	Q9NRX4	Q9NRX4	14 kDa phosphohistidine phosphatase	PHPT1	2873	up
-0.601845	-0.37676	-0.271614	0.0451336	-0.236526	0.241478	+	Doc+_Doc-	11	11	11	7.9	7.9	7.9	190.36	0	86.449	385140000	25	1.15556	0.0302867	0.433434	1.60829	Q7Z3U7	Q7Z3U7	Protein MON2 homolog	MON2	2048	up
3.05598	3.31226	3.18398	3.52608	3.52703	3.79125	+	Doc+_Doc-	13	13	13	76.8	76.8	76.8	22.088	0	162.17	4674100000	56	1.67331	0.010643	0.430711	2.00197	P07203	P07203	Glutathione peroxidase 1	GPX1	533	up
3.04647	3.026	3.06532	3.32596	3.50907	3.59359	+	Doc+_Doc-	6	6	6	48.8	48.8	48.8	23.31	0	90.956	4231300000	31	1.52376	0.0151925	0.430278	2.39314	P43487	P43487	Ran-specific GTPase-activating protein	RANBP1	1017	up
2.48417	2.36018	2.66572	2.97047	2.82506	2.99944	+	Doc+_Doc-	14	14	14	47.4	47.4	47.4	44.868	0	249.97	2912200000	66	1.66889	0.0106312	0.428301	2.1012	P31689	P31689	DnaJ homolog subfamily A member 1	DNAJA1	880	up
0.916101	0.971074	0.943789	1.38177	1.29007	1.44096	+	Doc+_Doc-	15	15	15	33.7	33.7	33.7	67.314	0	144.11	982000000	48	2.26738	0.00449659	0.427277	2.91312	P61221	P61221	ATP-binding cassette sub-family E member 1	ABCE1	1278	up
4.34553	4.23374	4.3446	4.67102	4.69088	4.84173	+	Doc+_Doc-	29	29	23	64.7	64.7	52.4	50.663	0	323.31	10131000000	145	2.36717	0.00326483	0.426583	2.57853	P50395	P50395	Rab GDP dissociation inhibitor beta	GDI2	1114	up
0.761803	0.773471	0.977423	1.21127	1.23779	1.34322	+	Doc+_Doc-	7	7	7	29.6	29.6	29.6	33.879	0	156.11	911990000	20	1.94743	0.00662255	0.426528	2.35938	Q9NP79	Q9NP79	Vacuolar protein sorting-associated protein VTA1 homolog	VTA1	2830	up
-1.54736	NaN	-1.64125	NaN	-1.24966	-1.08799	+	Doc+_Doc-	4	4	4	18.3	18.3	18.3	37.895	0	70.804	124920000	10	1.1758	0.0297929	0.42548	2.19913	P13995	P13995	Bifunctional methylenetetrahydrofolate dehydrogenase/cyclohydrolase, mitochondrial;NAD-dependent methylenetetrahydrofolate dehydrogenase;Methenyltetrahydrofolate cyclohydrolase	MTHFD2	654	up
-0.681051	-0.752803	-0.544123	-0.290215	-0.307531	-0.104975	+	Doc+_Doc-	10	9	9	19.5	18.2	18.2	69.948	0	73.962	324080000	21	2.0493	0.0054949	0.425085	2.24724	Q03252	Q03252	Lamin-B2	LMNB2	1469	up
-0.469	-0.642062	-0.718292	-0.306158	-0.122738	-0.127815	+	Doc+_Doc-	3	3	3	40.7	40.7	40.7	9.7251	0	45.726	345570000	14	1.91193	0.00820265	0.424214	2.17242	P62306	P62306	Small nuclear ribonucleoprotein F	SNRPF	1323	up
-0.988115	-1.13408	-1.06911	-0.618137	-0.645956	-0.659451	+	Doc+_Doc-	3	3	3	39.7	39.7	39.7	8.5468	0	28.08	244060000	13	2.19918	0.00503277	0.422589	2.9359	Q9BZL1	Q9BZL1	Ubiquitin-like protein 5	UBL5	2682	up
2.58196	2.49141	2.55993	2.91748	2.83045	3.14908	+	Doc+_Doc-	13	10	10	61.3	55.7	55.7	30.54	0	162.54	2973000000	51	1.41142	0.018497	0.421236	2.11766	Q13162	Q13162	Peroxiredoxin-4	PRDX4	1580	up
-0.990566	-1.12434	-0.654133	-0.500919	-0.402603	-0.604628	+	Doc+_Doc-	10	10	4	12.6	12.6	5	120.88	0	70.151	270100000	16	1.10258	0.035303	0.420295	1.67083	O75044;P0DMP2;Q7Z6B7	O75044;P0DMP2	SLIT-ROBO Rho GTPase-activating protein 2;SLIT-ROBO Rho GTPase-activating protein 2B	SRGAP2;SRGAP2B	292	up
-1.66465	-1.76177	-1.69732	-1.26204	-1.31681	NaN	+	Doc+_Doc-	5	5	5	16.8	16.8	16.8	54.12	0	55.566	147400000	11	2.57249	0.00338231	0.418488	2.99887	Q9UN86	Q9UN86	Ras GTPase-activating protein-binding protein 2	G3BP2	3123	up
0.381432	0.369559	0.476578	0.73369	0.860392	0.888794	+	Doc+_Doc-	12	12	12	33.3	33.3	33.3	56.878	0	120.3	674820000	40	2.52878	0.00341818	0.418436	2.64026	P53041	P53041	Serine/threonine-protein phosphatase 5	PPP5C	1181	up
3.39024	3.20612	3.39149	3.71577	3.72849	3.79879	+	Doc+_Doc-	29	29	29	41.1	41.1	41.1	102	0	323.31	5109600000	113	1.94517	0.00796121	0.418399	2.50876	Q7KZF4	Q7KZF4	Staphylococcal nuclease domain-containing protein 1	SND1	2021	up
0.682814	0.754861	0.814775	1.15689	0.962296	1.37765	+	Doc+_Doc-	6	6	6	72.1	72.1	72.1	15.892	0	55.178	854650000	27	1.19985	0.028	0.414795	1.83618	Q9Y2V2	Q9Y2V2	Calcium-regulated heat stable protein 1	CARHSP1	3185	up
1.77887	1.54073	1.71566	1.96613	2.02796	2.28441	+	Doc+_Doc-	32	32	32	29.8	29.8	29.8	156.27	0	301.9	1647700000	85	1.51732	0.0161842	0.414412	1.87779	Q86UP2	Q86UP2	Kinectin	KTN1	2088	up
1.62962	1.43564	1.5393	1.86573	1.95667	2.02417	+	Doc+_Doc-	9	9	9	37.7	37.7	37.7	27.325	0	88.854	1469100000	46	2.28387	0.00447826	0.414001	2.40084	Q99426	Q99426	Tubulin-folding cofactor B	TBCB	2530	up
0.85527	0.684295	0.864155	1.18165	1.0404	1.42316	+	Doc+_Doc-	9	9	9	23.6	23.6	23.6	49.03	0	72.346	884350000	29	1.33764	0.021684	0.41383	1.82989	P62495	P62495	Eukaryotic peptide chain release factor subunit 1	ETF1	1331	up
2.42972	2.67334	2.45516	2.83004	2.88113	3.08651	+	Doc+_Doc-	18	15	15	31.7	26.9	26.9	85.018	0	214.36	2931300000	67	1.70103	0.0113384	0.413155	1.96654	P17858	P17858	ATP-dependent 6-phosphofructokinase, liver type	PFKL	698	up
-0.534788	-0.499192	-0.231699	-0.172752	0.0251255	0.119795	+	Doc+_Doc-	12	12	12	16.5	16.5	16.5	110.5	0	106.33	378510000	29	1.47815	0.0173846	0.412616	1.80377	Q96A65	Q96A65	Exocyst complex component 4	EXOC4	2386	up
1.00778	0.795678	1.00186	1.25414	1.27259	1.50775	+	Doc+_Doc-	13	13	13	35.6	35.6	35.6	59.851	0	149.32	967130000	32	1.70561	0.0114492	0.409724	1.97586	O95394	O95394	Phosphoacetylglucosamine mutase	PGM3	426	up
6.34357	6.63138	6.48595	6.79909	6.86283	7.02725	+	Doc+_Doc-	9	9	9	68.5	68.5	68.5	18.012	0	192.58	46424000000	112	1.69341	0.012187	0.409422	1.9746	P62937;P0DN26;A0A0B4J2A2;A0A075B759;Q9Y536;F5H284;P0DN37	P62937	Peptidyl-prolyl cis-trans isomerase A;Peptidyl-prolyl cis-trans isomerase A, N-terminally processed	PPIA	1356	up
0.0379353	-0.0845804	-0.0937176	0.230118	0.351208	0.504652	+	Doc+_Doc-	9	9	9	32.6	32.6	32.6	35.853	0	66.416	489280000	20	1.7158	0.0107255	0.40878	2.15077	P15121;C9JRZ8	P15121	Aldose reductase	AKR1B1	671	up
0.0304012	0.203284	0.0719452	0.456526	0.512806	0.561493	+	Doc+_Doc-	10	10	10	29.3	29.3	29.3	43.482	0	92.931	543280000	28	2.27945	0.0049086	0.408398	2.54792	Q6NVY1	Q6NVY1	3-hydroxyisobutyryl-CoA hydrolase, mitochondrial	HIBCH	1964	up
1.15432	1.08103	1.0649	1.41355	1.43875	1.67017	+	Doc+_Doc-	15	15	15	24.4	24.4	24.4	87.334	0	183.13	1082300000	59	1.55447	0.0157557	0.407407	2.18828	P42224	P42224	Signal transducer and activator of transcription 1-alpha/beta	STAT1	993	up
-0.592094	-0.950631	-0.882811	-0.624285	-0.388985	-0.190887	+	Doc+_Doc-	9	9	9	19.7	19.7	19.7	63.472	0	84.385	289130000	26	1.14219	0.0345815	0.407126	1.52662	Q8N1G4	Q8N1G4	Leucine-rich repeat-containing protein 47	LRRC47	2172	up
1.77897	1.63082	1.72019	1.92768	2.16384	2.2596	+	Doc+_Doc-	13	13	13	34.3	34.3	34.3	44.743	0	88.831	1653600000	45	1.42069	0.0194421	0.407046	1.96048	Q9NTK5	Q9NTK5	Obg-like ATPase 1	OLA1	2886	up
-0.612553	-0.656535	-0.745033	-0.271706	-0.262316	-0.266365	+	Doc+_Doc-	7	7	7	22.2	22.2	22.2	50.854	0	66.579	317110000	17	2.0511	0.00814371	0.404578	2.90955	Q9NS86	Q9NS86	LanC-like protein 2	LANCL2	2879	up
1.16685	1.01937	1.049	1.39573	1.5171	1.52298	+	Doc+_Doc-	17	17	17	21.8	21.8	21.8	144.73	0	163.69	1063400000	36	2.53784	0.00329825	0.400196	2.48219	O15067	O15067	Phosphoribosylformylglycinamidine synthase	PFAS	153	up
-1.60065	-1.37103	-1.15222	-0.987904	-1.09342	-0.842768	+	Doc+_Doc-	5	5	2	11.1	11.1	4.6	65.695	0	43.92	194400000	17	1.15213	0.0345009	0.399935	1.60967	Q9UHD9	Q9UHD9	Ubiquilin-2	UBQLN2	3050	up
1.65401	1.5028	1.53079	2.10021	1.70481	2.08128	+	Doc+_Doc-	9	9	9	33	33	33	31.512	0	71.303	1494200000	22	1.11719	0.0366774	0.399562	1.68677	P54709	P54709	Sodium/potassium-transporting ATPase subunit beta-3	ATP1B3	1203	up
0.50724	0.341987	0.283192	0.651545	0.854752	0.82156	+	Doc+_Doc-	16	16	16	17.9	17.9	17.9	138.6	0	105.22	654160000	23	1.90539	0.00931488	0.398479	2.0757	O15357;Q92835	O15357	Phosphatidylinositol 3,4,5-trisphosphate 5-phosphatase 2	INPPL1	179	up
0.573072	0.260097	0.576546	0.72257	0.866171	1.01552	+	Doc+_Doc-	5	5	5	24.7	24.7	24.7	23.432	0	46.046	697080000	20	1.35535	0.0236651	0.398182	1.69617	P50914	P50914	60S ribosomal protein L14	RPL14	1127	up
-0.649298	-0.629701	-0.865633	-0.296396	-0.490904	-0.163475	+	Doc+_Doc-	7	7	7	12.9	12.9	12.9	86.478	0	57.571	306750000	23	1.48256	0.01846	0.397952	1.79692	Q15437	Q15437	Protein transport protein Sec23B	SEC23B	1777	up
1.398	1.37682	1.37987	1.72111	1.5869	2.03868	+	Doc+_Doc-	7	7	7	26.4	26.4	26.4	34.061	0	128.18	1368000000	30	1.0133	0.046522	0.397332	1.69718	Q02978	Q02978	Mitochondrial 2-oxoglutarate/malate carrier protein	SLC25A11	1466	up
0.498652	0.483716	0.207094	0.73173	0.764128	0.883488	+	Doc+_Doc-	8	8	8	28.5	28.5	28.5	38.044	0	81.609	661540000	23	1.45757	0.0188798	0.396628	1.93073	P25685;Q9UDY4	P25685	DnaJ homolog subfamily B member 1	DNAJB1	792	up
0.906181	0.530459	0.715487	0.899206	1.20808	1.22771	+	Doc+_Doc-	13	13	13	23.9	23.9	23.9	86.191	0	115.92	827540000	33	1.21917	0.0312469	0.394289	1.5651	O14964	O14964	Hepatocyte growth factor-regulated tyrosine kinase substrate	HGS	140	up
-0.526762	-0.746383	-0.363375	-0.16609	-0.165802	-0.126289	+	Doc+_Doc-	7	6	6	19.7	17.2	17.2	46.648	0	91.603	344210000	23	1.15863	0.0345108	0.392779	1.85495	Q9UNH7	Q9UNH7	Sorting nexin-6;Sorting nexin-6, N-terminally processed	SNX6	3127	up
1.27034	1.15403	1.30178	1.615	1.54358	1.73675	+	Doc+_Doc-	7	7	7	53.4	53.4	53.4	13.81	0	66.147	1184000000	24	2.18624	0.00607858	0.389729	2.26448	Q9Y237	Q9Y237	Peptidyl-prolyl cis-trans isomerase NIMA-interacting 4	PIN4	3152	up
2.60875	2.50673	2.60603	2.86536	2.86521	3.15381	+	Doc+_Doc-	19	19	19	27.2	27.2	27.2	107.14	0	266.02	2976200000	69	1.35478	0.0236329	0.387625	1.92023	P53618	P53618	Coatomer subunit beta	COPB1	1189	up
3.06572	2.72061	2.86036	3.18804	3.34447	3.27247	+	Doc+_Doc-	12	12	12	47.5	47.5	47.5	29.597	0	131.75	3693500000	53	1.3557	0.0241847	0.386094	1.83902	P62701;Q8TD47;P22090	P62701	40S ribosomal protein S4, X isoform	RPS4X	1334	up
0.495249	0.499682	0.525692	0.80842	0.909643	0.957832	+	Doc+_Doc-	10	9	9	40.6	38	38	33.729	0	66.106	709410000	25	1.99258	0.00942529	0.385091	2.65506	P11802;Q96Q40;O94921;Q07002;Q9NYV4;Q14004	P11802	Cyclin-dependent kinase 4	CDK4	622	up
0.591372	0.186233	0.191404	0.588387	0.692667	0.842562	+	Doc+_Doc-	5	5	5	23.6	23.6	23.6	20.546	0	48.832	625750000	27	1.07688	0.0430721	0.384869	1.52043	O15145	O15145	Actin-related protein 2/3 complex subunit 3	ARPC3	163	up
1.79358	1.72794	1.81793	2.03112	2.3333	2.123	+	Doc+_Doc-	9	9	9	32.5	32.5	32.5	23.577	0	63.102	1719900000	27	1.38648	0.0230325	0.382655	1.97871	P40429;Q6NVV1	P40429	60S ribosomal protein L13a	RPL13A	972	up
1.38401	1.40273	1.60352	1.71861	1.87169	1.94291	+	Doc+_Doc-	17	17	15	27.7	27.7	25.3	97.621	0	177.88	1374500000	48	1.77029	0.0129526	0.380985	1.93872	Q9UBF2	Q9UBF2	Coatomer subunit gamma-2	COPG2	3003	up
-1.70399	-1.65336	-1.35301	-1.26858	-1.26323	-1.03827	+	Doc+_Doc-	6	6	6	7.9	7.9	7.9	125.43	0	54.545	167860000	10	1.27505	0.02833	0.380096	1.62951	Q7Z2Z2	Q7Z2Z2	Elongation factor Tu GTP-binding domain-containing protein 1	EFTUD1	2043	up
1.13743	1.04429	1.29203	1.53955	1.50238	1.56442	+	Doc+_Doc-	13	13	13	30	30	30	63.944	0	134.57	1111200000	55	1.54176	0.018338	0.377533	2.16397	Q96HC4	Q96HC4	PDZ and LIM domain protein 5	PDLIM5	2459	up
-0.248079	-0.376943	-0.0482578	0.0777245	0.174515	0.202168	+	Doc+_Doc-	13	13	13	14.6	14.6	14.6	118.08	0	115.34	431280000	24	1.35214	0.0251826	0.375896	1.85361	Q4VCS5	Q4VCS5	Angiomotin	AMOT	1860	up
-1.52528	-1.57691	-1.25848	-1.15535	-1.24789	-0.848532	+	Doc+_Doc-	6	6	6	16.2	16.2	16.2	46.659	0	41.932	181200000	12	1.10078	0.0437068	0.369631	1.44449	O75874	O75874	Isocitrate dehydrogenase [NADP] cytoplasmic	IDH1	354	up
-1.20955	-1.28202	-0.958891	-0.772203	-0.883318	-0.693443	+	Doc+_Doc-	3	3	3	13.9	13.9	13.9	24.669	0	16.46	223220000	12	1.36024	0.0256088	0.367164	1.72927	O75608	O75608	Acyl-protein thioesterase 1	LYPLA1	339	up
-0.649836	-0.499541	-0.894764	-0.258575	-0.469398	-0.214987	+	Doc+_Doc-	6	6	6	13.9	13.9	13.9	75.775	0	57.354	309310000	14	1.18062	0.0371057	0.36706	1.53316	Q99805	Q99805	Transmembrane 9 superfamily member 2	TM9SF2	2567	up
-0.42778	-0.46844	-0.366997	-0.179911	-0.0902328	0.104591	+	Doc+_Doc-	8	8	8	20.4	20.4	20.4	54.141	0	76.645	369040000	14	1.43081	0.0232099	0.365888	1.93591	Q6NXE6	Q6NXE6	Armadillo repeat-containing protein 6	ARMC6	1965	up
3.86696	4.13034	4.0897	4.19715	4.38975	4.58918	+	Doc+_Doc-	4	4	4	36.5	36.5	36.5	12.476	0	55.297	8229200000	25	1.1803	0.0376182	0.363027	1.51464	P14174	P14174	Macrophage migration inhibitory factor	MIF	655	up
0.578386	0.591025	0.593781	0.860003	0.981575	1.01008	+	Doc+_Doc-	10	10	2	25.9	25.9	4	53.974	0	131.55	741770000	28	1.82566	0.0142564	0.362823	2.48066	Q9NUU7;Q9UHL0	Q9NUU7	ATP-dependent RNA helicase DDX19A	DDX19A	2899	up
-0.608156	-0.30045	-0.280018	-0.0301838	-0.197145	0.122759	+	Doc+_Doc-	8	8	8	17.1	17.1	17.1	64.989	0	71.674	375390000	26	1.19886	0.0369509	0.361351	1.5012	Q9BY44	Q9BY44	Eukaryotic translation initiation factor 2A;Eukaryotic translation initiation factor 2A, N-terminally processed	EIF2A	2665	up
-0.206337	-0.0474577	-0.171556	0.155615	0.158514	0.344139	+	Doc+_Doc-	6	6	6	37.9	37.9	37.9	19.463	0	109.34	446770000	24	1.93046	0.0106548	0.361206	2.01981	P62633	P62633	Cellular nucleic acid-binding protein	CNBP	1332	up
5.42173	5.27903	5.52005	5.84796	5.57211	5.87801	+	Doc+_Doc-	13	13	13	69.5	69.5	69.5	16.832	0	244.09	21358000000	105	1.34302	0.0276931	0.359089	1.6331	P63241;Q6IS14;Q9GZV4	P63241;Q6IS14;Q9GZV4	Eukaryotic translation initiation factor 5A-1;Eukaryotic translation initiation factor 5A-1-like;Eukaryotic translation initiation factor 5A-2	EIF5A;EIF5AL1;EIF5A2	1371	up
-0.196363	-0.160472	-0.311544	0.194401	0.0359898	0.177973	+	Doc+_Doc-	7	7	7	27.1	27.1	27.1	32.233	0	94.819	422740000	19	2.20063	0.00811456	0.358914	2.13812	Q14165	Q14165	Malectin	MLEC	1668	up
0.111002	0.26884	0.376053	0.561462	0.509527	0.751532	+	Doc+_Doc-	6	6	6	36.9	36.9	36.9	22.977	0	78.055	585620000	22	1.53844	0.0210019	0.355542	1.722	Q9NP72	Q9NP72	Ras-related protein Rab-18	RAB18	2828	up
2.22404	2.21977	2.26802	2.51062	2.56081	2.70339	+	Doc+_Doc-	14	14	14	42.9	42.9	42.9	54.416	0	269.21	2315500000	60	1.70347	0.0161677	0.354325	2.21783	P26196	P26196	Probable ATP-dependent RNA helicase DDX6	DDX6	800	up
0.0103874	-0.0232916	0.129393	0.431631	0.25771	0.484247	+	Doc+_Doc-	10	10	10	25	25	25	66.591	0	117.11	504900000	29	1.76638	0.0154511	0.352366	1.92924	Q9Y5X1	Q9Y5X1	Sorting nexin-9	SNX9	3268	up
5.12919	5.04741	5.29518	5.49024	5.40399	5.61775	+	Doc+_Doc-	22	22	12	53.2	53.2	27.8	46.153	0	323.31	17811000000	151	1.63253	0.0192785	0.346731	1.7713	P60842	P60842	Eukaryotic initiation factor 4A-I	EIF4A1	1253	up
-0.6754	-1.01713	-0.85066	-0.638245	-0.40498	-0.46022	+	Doc+_Doc-	4	4	4	34.3	34.3	34.3	12.855	0	28.54	272700000	13	1.28615	0.0336481	0.34658	1.5669	O75347	O75347	Tubulin-specific chaperone A	TBCA	311	up
[truncated: 1,444 more rows]

## Sheet: Fig2
	Charge	Protein group IDs	Multiplicity	Localization prob	PEP	Score	Delta score	Score for localization	Mass error [ppm]	Intensity	Position	Proteins	Positions within proteins	Leading proteins	Protein	Protein names	Gene names	Sequence window	Phospho (STY) Probabilities	Log2 intensity ATP+_ALK+_1	Log2 intensity ATP+_ALK+_2	Log2 intensity ATP+_ALK+_3	Log2 intensity ATP-_ALK+_1	Log2 intensity ATP-_ALK+_2	Log2 intensity ATP-_ALK+_3	Log2 intensity ATP+_ALK-_1	Log2 intensity ATP+_ALK-_2	Log2 intensity ATP+_ALK-_3	Log2 intensity ATP-_ALK-_1	Log2 intensity ATP-_ALK-_2	Log2 intensity ATP-_ALK-_3	Average intensity ATP+ ALK+	Average intensity ATP- ALK+	Average intensity ATP+ ALK-	Average intensity ATP- ALK-	stdev ATP+ ALK+	stdev ATP- ALK+	stdev ATP+ ALK-	stdev ATP- ALK-
[truncated: 27 more rows]

[truncated: 4 more sheets: Fig3, Fig4, Fig5, Fig6]
